# Supplementary material for: A compendium of inborn errors of metabolism mapped onto the human metabolic network
Source: Royal Society of Chemistry journal article supplement (doi:10.1039/c2mb25075f), 2012-05-02
Supplement: c2mb25075f.xlsx [file c2mb25075f.xlsx]

## Sheet: mappedIEMs supple table
disease (Mapped IEMs)	type of disorder	metabolism involved	affected genes/proteins (with Boolean rules)	refined affected genes for counting purpose	EntrezGeneID	# genes per iem	corresponding reaction in Recon1	# reactions per iem	reactions associated with genes, i.e. rxn length (as mentioned in Recon 1)	mode of inheritance	modification in inheritance mode for analysis purpose	known phenotype	affected high level system/organs affected	systems/organs affected	notes	biomarkers/changes in metabolite concentration	# biomarkers per iem( note: cholesterol includes all its derivatives also)	healthy concentration ranges	frequency of disease	known therapies	# therapy per iem(no treatment includes no treatment and symptomatic therapy)(gene therapy is GT)(organ transplantation is TP)	remarks:imp. Note:in all the above diseases the MIC database,gene reviews,OMIM database and genetic home referance and entrezgene has been thoroughly followed.	references
Tangier disease	lipid disorder	lipid metabolism	ABCA1	ABCA1	19	1	CHSTEROLtg,CHSTEROLt	2	2	autosomal recessive	autosomal recessive		nervous system, spleen, liver,	nervous system, spleen, liver,	Affected individuals often develop atherosclerosis and type 2 diabetes.	in serum-reduced Apolipoprotein , Apo-A-I and HDL cholesterol but elevated Triglycerides.	cholesterol		Tangier disease is a rare disorder with approximately 100 cases identified worldwide. More cases are likely undiagnosed. This condition is named after an island off the coast of Virginia where the first affected individuals were identified.			OMIM:205400	PMID: 20070997
pseudo-Zellweger syndrome	fatty acid beta oxidation	lipid metabolism	ACAA1	ACAA1	30	1	ACACT4p, ACACT5p, ACACT6p, ACACT7p, ACACT8p, ACACT9p, FAOXC16080x, FAOXC180x, FAOXC183806x, FAOXC18480x, FAOXC200180x, FAOXC2051843x, FAOXC2242046x, FAOXC2251836x, FAOXC2252053x, FAOXC226205x, FAOXC240200x, FAOXC241181x, FAOXC2442246x, FAOXC2452253x, FAOXC2452256x, FAOXC246226x, FAOXC260240x, PEROXx	24	62	autosomal recessive	autosomal recessive		nervous system, kidney	nervous system, kidney		in plasma-increased Pipecolic acid and increased serum Very-long-chain fatty acids.	fatty acid	plasma Pipecolic acid (0.80-5.30 µmol/l) (mic)					OMIM:261515
Acetyl-CoA carboxylase deficiency	lipid disorder	lipid metabolism	ACACA	ACACA	31	1	ACCOAC	1	1				muscle, nervous system	muscles, nervous system		hypotonic myopathy and neurologic damage, excretion of urinary metabolites of hexanoic acid, including 2-ethyl-3-keto-hexanoic acid, 2-ethyl-3-hydroxy-hexanoic acid, and 2-ethyl-hexanedioic acid. Deficient ACC activity was found in her liver.	fatty acid		Only 1 case of ACC deficiency has been reported (Blom et al., 1981).			OMIM:200350	PMID: 6114432
medium chain acyl coA dehydrogenase deficiency	fatty acid disorders	lipid metabolism	ACADM	ACADM	34	1	FAOXC101C102m, FAOXC8C6m, FAOXC6C4m, FAOXC12C10m, FAOXC10C8m, FAOXC11C9m, FAOXC9C7m, FAOXC7C5m, FAOXC121C101m, FAOXTC101TC102m, FAOXC102C103m, FAOXC81C61m, FAOXC10C10OHm, FAOXC12C12OHm	14	46	autosomal recessive	autosomal recessive	Classic MCAD deficiency and Mild MCAD deficiency	liver, nervous system	liver,brain	Iafolla et al. (1994)-survivors have a risk of developmental disability, chronic muscle weakness, failure to thrive, and 'cerebral palsy.'-OMIM:201450	increase C8/C10 and C10:1 in blood,increased medium chain dicarboxylic acids in urine	acylcarnitine		in United states 1 in 17,000 people.more commen among individuals of northern European ancestry and ranges between 1:4,900 and 1:17,000 births.	avoidance of fasting glycine high-carbohydrate diet L-carnitine low-fat diet	diet		PMID:20490924,PMID:20195903
short chain acyl coA dehydrogenase deficiency	fatty acid disorders	lipid metabolism	ACADS	ACADS	35	1	FAOXC4C2m, FAOXC5C3x	2	30	autosomal recessive	autosomal recessive	Two distinct clinical phenotypes of hereditary short-chain acyl-CoA dehydrogenase deficiency have been identified. One type has been observed in infants with acute acidosis and muscle weakness; the other has been observed in middle-aged patients with chronic myopathy.	muscle	skeletal muscles	Bhala et al. (1995)-All patients with SCAD had neurologic deficits: hypotonia/hypertonia, hyperactivity, and/or developmental delay. Ribes et al. (1998)- One twin developed hypotonia and decreased level of consciousness following an upper respiratory infection at 5 months.-OMIM:201470	increased C4 in plasma,increased adipic acid in urine	acylcarnitine		1 in 40,000 to 100,000 newborns.	avoidance of fasting glucose infusion (acute) riboflavin	medications		PMID:20490924,PMID:20195903
Very long-chain acyl-coenzyme A dehydrogenase (VLCAD) deficiency	beta oxidation of fatty acids	lipid metabolism	ACADVL	ACADVL	37	1	FAOXC182C162m, FAOXC162C142m, FAOXC142C122m, FAOXC14C12m, FAOXC15C13m, FAOXC13C11m, FAOXC16C14m, FAOXC14C12m, FAOXC161C141m, FAOXC141C121m, FAOXC17C15m, FAOXC181C161m, FAOXTC182TC162m, FAOXTC162TC142m, FAOXTC142TC122m, FAOXC183C163m, FAOXC163C143m, FAOXC143C123m, FAOXC225C226m, FAOXC204C184m, FAOXC226C227m, FAOXC226C205m, FAOXC205C185m, FAOXC185C164m, FAOXC164C165m, FAOXC184C164m, FAOXC183C163Gm,…	34	36	autosomal recessive	autosomal recessive	3 forms-1) severe, early-onset, cardiac and multiorgan failure form typically presents in the first months of life, 2) hepatic or hypoketotic hypoglycemic form typically presents during early childhood, 3) later-onset episodic myopathic form presents with intermittent rhabdomyolysis, muscle cramps and/or pain, and/or exercise intolerance. Hypoglycemia typically is not present at the time of sympt…	nervous system, muscle, liver, heart	muscle, liver, heart, nervous system		In blood- decreased glucose and ph, increased Oleoylcarnitine (C18:1) , Palmitoylcarnitine (C16), Tetradecadienoylcarnitine (C14:2) , Tetradecanoylcarnitine (C14) , Tetradecenoylcarnitine (C14:1). Decreased activity of Very-long-chain acyl-CoA dehydrogenase in fibroblast, In plasma- increased Long chain acyl carnitines , Tetradecenoic acid . In urine- increased 3-Hydroxyadipic acid , Adipic acid …	enzyme	In blood- glucose (3.30-5.50 mmol/l), ph (7.35-7.45), Tetradecadienoylcarnitine (C14:2) (0.00-0.12 µmol/l ), Tetradecenoylcarnitine (C14:1) (0.02-0.27 µmol/l). Plasma Long chain acyl carnitines (0.00-7.00 µmol/l). In urine- 3-Hydroxyadipic acid (3.80-43.60 mmol/mol creatinine), adipic acid (0.00-34.30 mmol/mol creatinine), Mb (0.00-50.00 µg/l), suberic acid (0.00-2.00 mmol/mol creatinine). (mic)	1 in 40,000 to 120,000 people	avoidance of fasting bezafibrate L-carnitine medium-chain triglycerides (MCT)	diet	OMIM:201475	http://www.ncbi.nlm.nih.gov/books/NBK6816/
Beta-ketothiolase deficiency	organic acid disorders	amino acid metabolism	ACAT1	ACAT1	38	1	ACACT10m	1	2	autosomal recessive	autosomal recessive		nervous system	brain	severe metabolic acidosis is the hallmark-OMIM:203750	in blood-increased C5:1,C5OH. In urine-hydroxybutyric acid,tiglyl glycine etc.	acylcarnitine		1 in 1 million newborns.	avoidance of fasting L-carnitine low-protein diet	diet		PMID: 16950638
pseudoneonatal adrenoleukodystrophy	beta oxidation of fatty acids	lipid metabolism	ACOX1	ACOX1	51	1	ACOAO7p, FAOXC16080x, FAOXC180x, FAOXC183806x, FAOXC18480x, FAOXC200180x, FAOXC2051843x, FAOXC2242046x, FAOXC2251836x, FAOXC2252053x, FAOXC226205x, FAOXC240200x, FAOXC241181x, FAOXC2442246x, FAOXC2452253x, FAOXC2452256x, FAOXC246226x, FAOXC260240x, FAOXC24C22x, FAOXC16C14x, FAOXC14C12x, FAOXC12C10x, FAOXC10C8x, FAOXC8C6x, FAOXC6C4x, FAOXC184C164x, FAOXC164C165x, FAOXC143C123x, FAOXC102C103x, FAOX…	48	48	autosomal recessive	autosomal recessive		nervous system	nervous system		increased very long chain fatty acids and decresed activity of the peroxisomal fatty acyl-CoA oxidase.	enzyme					OMIM:264470	PMID: 17458872
Aminoacylase 1 deficiency	Urea cycle/amino group metabolism	amino acid metabolism	ACY1	ACY1	95	1	ACODA	1	1			Sass et al. (2006) presented 4 children with a genetic deficiency of ACY1. The clinical phenotypes of the patients were heterogeneous: nonspecific psychomotor delay in 1 subject, psychomotor delay with atrophy of the vermis and syringomyelia in a second, marked muscular hypotonia in a third, and follow-up for early treated biotinidase deficiency with normal clinical findings in the fourth subject.	nervous system, muscle	nervous system, muscles		decreased activity of Aminoacylase I in lyphoblasts. In urine-elevated levels of N-acetylalanine ,N-acetylamethionine ,N-acetylglutamate ,N-acetylglycine ,N-acetylisoleucine ,N-acetylleucine ,N-acetylserine ,N-acetylthreonine and N-acetylvaline.	enzyme		very rare (4 cases)			OMIM:609924	PMID: 16274666
Adenosine deaminase (ADA) deficiency	nucleotide metabolism	nucleotide metabolism	ADA	ADA	100	1	ADA,ADAe,DADA,DADAe	4	4	autosomal recessive	autosomal recessive	1)ADA-deficiency SCID. 2)Delayed-/late-onset ADA deficiency. 3)Partial ADA deficiency	immune system	immune system		assessment of ADA activity .decreased Lymphocytes in blood.	enzyme		Adenosine deaminase deficiency is very rare and is estimated to occur in approximately 1 in 200,000 to 1,000,000 newborns worldwide. This disorder is responsible for approximately 15 percent of SCID cases	bone marrow transplantation enzyme replacement therapy gene therapy	gene therapy,TP,enzyme therapy	OMIM:102700	http://www.ncbi.nlm.nih.gov/bookshelf/br.fcgi?book=gene&part=ada
Glycogen storage disease IIIa/Glycogen storage disease IIIb/CORI DISEASE	carbohydrate disorder	carbohydrate metabolism	AGL	AGL	178	1	GLDBRAN	1	1	autosomal recessive	autosomal recessive	1)GSD IIIa (~85% of all GSD III). Liver and muscle involvement, presumably resulting from enzyme deficiency in both liver and muscle 2)GSD IIIb (~15% of all GSD III). Only liver involvement, presumably resulting from enzyme deficiency in liver only 3)GSDIIIc (extremely rare). Presumably the result of deficiency of only glucosidase debranching activity 4)GSDIIId (extremely rare). Presumably the re…	liver, heart, muscle	liver, heart, muscles		liver and muscle Amylo-1,6-glucosidase decreased activity. In serum-increased Cholesterol ,Creatinine kinase ,Transaminases and Triglycerides but low glucose after 24 hrs fasting. In urine- high levels of Ketone bodies	enzyme		1:125.000, Israel 1:5420	cornstarch, uncooked frequent feeding gastric drip feeding at night maltodextrin	diet	OMIM:232400	http://www.ncbi.nlm.nih.gov/bookshelf/br.fcgi?book=gene&part=gsd3
Primary hyperoxaluria-type 1	amino acid disorders	amino acid metabolism	AGXT	AGXT	189	1	AGTim,AGTix,SPTix	3	2	autosomal recessive	autosomal recessive		kidney	kidney	Danpure [2001] reported Tissues Involved in Systemic Calcium Oxalate Deposition in PH1: Kidney and urinary tract,Bone,Eye,Teeth, mouth, and associated structures,Nerves,Brain and meninges,Heart,Deep vasculature,Peripheral vasculature and skin,Bone marrow,Cartilage, ligaments, and synovial tissue, thymus, adipose tissue, skeletal muscle and liver blood vessels-http://www.ncbi.nlm.nih.gov/bookshelf…	in urine-increased glycolic acid,glyoxylic acid and oxalate. Reducing substances present.	organic acid	Plasma Oxalate - <2.5 µmol/L based on oxalate oxidase assay(gene reviews), in urine-Glycolic acid (11.00-103.00 mmol/mol creatinine),Glyoxylic acid (0.00-11.00 mmol/mol creatinine),Oxalate( 0.00-54.00 mmol/mol creatinine)(metabolic information centre)	1 to 3 per million people; it is more common in some Mediterranean countries, such as Tunisia	hemofiltration/hemodialysis/peritonealdialysis liver transplantation liver-kidney transplantation low-oxalate diet sodium citrate Vitamin B6 (pyridoxine)	TP	OMIM:259900	http://www.ncbi.nlm.nih.gov/bookshelf/br.fcgi?book=gene&part=ph1
Hemolytic anemia due to adenylate kinase deficiency	nucleotide metabolism	nucleotide metabolism	AK1	AK1	203	1	ADK1	1	1	Autosomal recessive	autosomal recessive		RBC, nervous system	red blood cells, nervous system					3 cases in italy have been reported.			OMIM:612631	PMID: 2297346
reticular dysgenesis (RDYS)/aleukocytosis	nucleotide metabolism	nucleotide metabolism	AK2	AK2	204	1	ADK1m	1	1				immune system, nervous system	bone marrow, thymus, immune cells, nervous sytem		congenital agranulocytosis, lymphopenia, and lymphoid and thymic hypoplasia with absent cellular and humoral immunity functions.				bone-marrow transplant, methylprednisolone	TP	OMIM:267500	PMID: 19043416, PMID: 19043417
delta-aminolevulinate dehydratase deficiency	heme biosythesis disorder	heme biosythesis disorder	ALAD	ALAD	210	1	PPBNGS	1	1	autosomal recessive	autosomal recessive	1)PORPHYRIA, ACUTE HEPATIC form associated with ALAD, GLY133ARG,ALAD, VAL275MET,ALAD, ARG240TRP,ALAD, ALA274THR,ALAD, IVS3AS, C-A, -11,ALAD, IVS3AS, C-T, -11 mutations. 2)AMINOLEVULINATE DEHYDRATASE, ALAD*1/ALAD*2 POLYMORPHISM-ALAD, LYS59ASN mutation. 3)PORPHYRIA, ACUTE HEPATIC, DIGENIC form-ALAD, PHE12LEU mutation.				decreased Delta-aminolevulinic acid dehydratase activity in erythrocytes, increased Porphyrins in urine and erythrocytes. Increased urinary Delta-aminolevulinic acid.	enzyme		very rare-4 cases of autosomal recessive benign disorder, acute episodes should be managed as for other acute porphyrias (Elder GH 1997).			OMIM:125270	PMID: 17236137
X-linked adrenoleukodystrophy	transport defect of very long chain fatty acids	lipid metabolism	ABCD1	ABCD1	215	1	LGNCCOAtcx, C16txc, STRDNCCOAtxc, DCSPTN1COAtxc, DOCOSCOAtxc, NRVNCCOAtxc, DOCO13ECOAtxc, STCOATxc	8	8	X-linked	X-linked	3 types- 1)childhood cerebral form manifests most commonly between ages four and eight years, 2)adrenomyeloneuropathy (AMN), manifests most commonly in the late twenties and 3)Addison disease only," presents with primary adrenocortical insufficiency between age two years and adulthood and most commonly by age 7.5 years.	nervous system, adrenals	nervous system, adrenal glands.		increased very long chain fatty acids in plasma	fatty acid		1 in 20,000 individuals worldwide	Corticosteroid replacement therapy	medications		http://www.ncbi.nlm.nih.gov/books/NBK1315/
Sjoegren-Larsson syndrome	fatty acid and aldehyde metabolism	xenobiotic metabolism	ALDH3A2	ALDH3A2	224	1	5HOXINDACTOX,ALDD20x,ALDD21,ALDD2x,ALDD2y,BAMPPALDOX,GCALDD,IMACTD, LCADi,LCADi_D,NABTNO, PYLALDOX, FAOXOHC16C16DCc, FAOXOHC22C22DCc, FAOXOHMC10DC10c	15	18	autosomal recessive	autosomal recessive		skin, eye, nervous system	skin, retina(eye), nervous system								MIM ID #270200	PMID: 16903323 , http://www.uniprot.org/uniprot/P51648
X-linked adrenoleukodystrophy	transport defect of very long chain fatty acids	lipid metabolism	ABCD2	ABCD2	225	1	LGNCCOAtcx, DCSPTN1COAtxc, DOCOSCOAtxc, NRVNCCOAtxc, DOCO13ECOAtxc	5	5	X-linked	X-linked	3 types- 1)childhood cerebral form manifests most commonly between ages four and eight years, 2)adrenomyeloneuropathy (AMN), manifests most commonly in the late twenties and 3)Addison disease only," presents with primary adrenocortical insufficiency between age two years and adulthood and most commonly by age 7.5 years.	nervous system, adrenals	nervous system, adrenal glands		in plasma increased amounts of very lobg chain fatty acids	fatty acid		1 in 20,000 individuals worldwide	Corticosteroid replacement therapy	medications		http://www.ncbi.nlm.nih.gov/books/NBK1315/
Glycogen storage disease XII/Aldolase A deficiency	carbohydrate disorder	carbohydrate metabolism	ALDOA	ALDOA	226	1	FBA,FBA2	2	3	autosomal recessive	autosomal recessive		nervous system, muscle	nervous system, muscles		nonspherocytic hemolytic anemia, mental retardation, and increased hepatic glycogen	carbohydrate					OMIM:611881	PMID: 8598869
hereditary fructose intolerance	carbohydrate disorder	carbohydrate metabolism	ALDOB	ALDOB	229	1	FBA2	1	4	autosomal recessive	autosomal recessive		liver	liver		Fructose 1,6-biphosphate aldolase activity decreases in liver,kidney and small intestine. Fructoce level increases in urine and blood.	enzyme		1:20000 in Switzerland	elimination of fructose from the diet	diet	OMIM:229600
Hypophosphatasia	abnormal version of alkaline phosphatase/Glycerophospholipid Metabolism	carbohydrate metabolism	ALPL	ALPL	249	1	ALKP	1	1	severe forms of hypophosphatasia that appear early in life are inherited in an autosomal recessive pattern. Milder forms of hypophosphatasia can have either an autosomal recessive or an autosomal dominant pattern of inheritance.	autosomal recessive or autosomal dominant	1)Perinatal (lethal) hypophosphatasia 2)Perinatal (benign) hypophosphatasia 3)Infantile hypophosphatasia 4)Pseudohypophosphatasia 5)Childhood hypophosphatasia 6)Adult hypophosphatasia 7)Odontohypophosphatasia.	skeletal system	bones, teeth, skeletal system		serum-low Osteocalcin and decreased activity of Phosphatase, alkaline . In urine-elevated levels of Phosphoethanolamine.	enzyme		Severe forms of hypophosphatasia affect an estimated 1 in 100,000 newborns. Milder cases, such as those that appear in childhood or adulthood, probably occur more frequently. Mennonite population in Manitoba, Canada-1 in 2,500 infants is born with severe features of the condition.	nonsteroidal antiinflammatory drugs	medications	OMIM:241500, OMIM:241510, OMIM:146300	http://www.ncbi.nlm.nih.gov/bookshelf/br.fcgi?book=gene&part=hops
myoadenylate deaminase deficiency	nucleotide metabolism	nucleotide metabolism	AMPD1	AMPD1	270	1	AMPDA	1	1				muscle, heart	muscles, heart		increased Creatinine kinase in serum and ,myoglobin in urine.	enzyme					OMIM:102770	PMID: 3916903
erythrocyte AMP deaminase deficiency	nucleotide metabolism	nucleotide metabolism	AMPD3	AMPD3	272	1	AMPDA	1	1	autosomal recessive	autosomal recessive			It is a clinically asymptomatic condition characterized by a 50% increase in steady-state levels of ATP in affected cells. Individuals with complete deficiency of erythrocyte AMP deaminase are healthy and have no hematologic disorders.		Degradation of adenine nucleotide was slower in the deficient erythrocytes than in the control erythrocytes	N-base		Yamada et al. (1994) stated that AMPD3 deficiency had been found in Europe and that the frequency in northern Poland was almost the same as that in east Asia (heterozygote frequency of 1 in 30).			OMIM:612874	PubMed: 3804327
Adenine phosphoribosyltransferase deficiency	nucleotide metabolism	nucleotide metabolism	APRT	APRT	353	1	ADPT	1	1	autosomal recessive	autosomal recessive		kidney	kidney and urinary tract.		2,8-Dihydroxyadenine increased in urine.	N-base			allopurinol high fluid intake low-purine diet	diet	OMIM:102600
Arginase deficiency	amino acid disorders	amino acid metabolism	ARG1	ARG1	383	1	ARGN	1	1	autosomal recessive	autosomal recessive	no genotype-phenotype correlation has been found.	nervous system, RBC	brain,RBC	Cowley et al. (1998) reported no arginase activity in liver tissue.-OMIM:207800	increased blood urea nitrogen, in plasma-increased creatine,arginine,guanidoacetate and homoarginine, in urine-increased excretion of argininosuccinate,orotic acid and uracil.	amino acid	plasma arginine-6.00-140.00 µmol/l(metabolic information centre)	1 in every 300,000 to 1,000,000 individuals.	amino acid mixture low-protein diet sodium benzoate	diet		PMID: 15694174
Metachromatic leukodystrophy	Sphingolipid Metabolism	lipid metabolism	ARSA	ARSA	410	1	ARSA	1	1	autosomal recessive	autosomal recessive	Individuals with the 22q13.3 deletion syndrome often have a deletion of the ARSA gene. Presence of an ARSA-PD allele on the homologous chromosome resulting in arylsulfatase A pseudodeficiency has been reported in 22q13.3 deletion syndrome [Phelan et al 2001].Ring 22. Coulter-Mackie et al [1995] reported an individual with a ring chromosome 22 (including deletion of the ARSA gene) who had MLD resu…	nervous system, muscle	nervous system, spinal cord, muscle		decreased Arylsulfatase A activity in all tissues. Increased protein in spinal fluid. In urine-Galactosylceramide 3-sulfate,Lactosylceramide 3-sulfate and Sulfatide increased excretion.	enzyme		1 in 40,000 to 160,000 individuals worldwide. Much higher incidence has been reported in certain genetically isolated populations, such as 1 in 75 in a small group of Jews who immigrated to Israel from southern Arabia (Habbanites), 1 in 2,500 in the western portion of the Navajo Nation, and 1 in 8,000 among Arab groups in Israel.	bone marrow transplantation immunomodulation vigabatrin	TP	OMIM:250100	http://www.ncbi.nlm.nih.gov/bookshelf/br.fcgi?book=gene&part=mld
Mucopolysaccharidosis type VI/Maroteaux-Lamy syndrome	carbohydrate disorder	carbohydrate metabolism	ARSB	ARSB	411	1	S4TASE1ly,S4TASE2ly ,S4TASE3ly,S4TASE4ly,S4TASE5ly	5	5	autosomal recessive	autosomal recessive	In 9 patients with MPS VI, Litjens et al. (1996) identified several mutations in the ARSB gene (see, e.g., 611542.0008-611542.0010). All patients were compound heterozygotes and showed variable phenotypes ranging from mild to severe. For each patient, the combined biochemical phenotypes of the 2 mutant sulfatase alleles demonstrated a good correspondence with the observed clinical phenotype.	nervous system, tongue, heart, liver, spleen, eye	brain,tongue,heart,liver,spleen,eye(cornea)	Unlike other types of mucopolysaccharidosis, MPS VI does not affect intelligence.	decreased activity of N-Acetylgalactosamin-4-sulfate sulfatase in fibroblast. In urine-increased dermatan sulfate and mucoploysaccharides.Maroteaux et al. (1963) first described this disorder as a novel dysostosis associated with increased urinary excretion of chondroitin sulfate.	enzyme		The exact incidence of MPS VI is unknown, although it is estimated to occur in 1 in 250,000 to 600,000 newborns.	bone marrow transplantation enzyme replacement therapy no specific treatment supportive/symptomatic therapy	enzyme therapy,TP	OMIM:253200	PMID: 20385007
X-linked ichthyosis	steroid metabolism	hormone metabolism	STS	STS	412	1	STS2,STS2r,STS4,STS4r	4	8	X-linked recessive	X-linked		skin, eye	skin, cornea		Shapiro et al. (1978) identified placental steroid sulfatase deficiency by measuring estriol in the urine of pregnant women as an indication of a gestational abnormality.Lake et al. (1991) developed a histochemical method for demonstration of hexanol dehydrogenase activity by use of a simple staining method on cryostat sections of skin biopsies as an adjunct to the biochemical assay in the differ…	enzyme		1 in 6,000 males studied in various populations (Shapiro et al., 1978)	Lykkesfeldt and Hoyer (1983) found that a topical cream containing 10% cholesterol effected considerable improvement, suggesting that reduction in the cholesterol content of the stratum corneum may be responsible for abnormal cornification in this disorder.	medications	OMIM.308100
Farber lipogranulomatosis	lysosomal disorder	lipid metabolism	ASAH1	ASAH1	427	1	ASAH1	1	1	autosomal recessive	autosomal recessive	1)Type 1 is the most common form of this condition and is associated with the classic signs of voice, skin, and joint problems.Infants born with this form of the disorder usually survive only into early childhood. 2)Types 2 and 3 generally have milder signs and symptoms than the other types. Affected individuals have the three classic signs with mild, if any, intellectual disability and they gene…	skin, skeletal system, liver, spleen, nervous system	skin, joints, liver, spleen and nervous system		Acid ceramidase activity decreases in fibroblast.	enzyme		Farber lipogranulomatosis is a very rare disorder. About 80 individuals affected by this condition have been reported worldwide.	no specific treatment	no treatment	OMIM:228000	PMID: 19250404
Argininosuccinic aciduria	amino acid disorders	amino acid metabolism	ASL	ASL	435	1	ARGSL	1	1	autosomal recessive	autosomal recessive		nervous system, liver, skin	brain,liver,skin	Asai et al. (1997)- Argininosuccinase activity was absent in her erythrocytes.-OMIM:207900. brittle hair also seen	in plasma-increased argininosuccinate,citrulline,glutamine,lysine.in urine-elevated argininosuccinate,glycine,orotic acid,lysine,uracil etc.	amino acid	plasma-Argininosuccinate 0.00-2.00 µmol/l, Citrulline -10.00-45.00 µmol/l, Glutamine -376.00-709.00 µmol/l, Lysine -92.00-325.00 µmol/l(metabolic information centre)	1 in 70,000 newborns.	arginine-HCl liver transplantation low-protein diet	TP	OMIM:207900	PMID: 12384776
Canavan disease	amino acid disorders	amino acid metabolism	ASPA	ASPA	443	1	NACASPAH	1	1	autosomal recessive	autosomal recessive	Velinov et al. (2008) concluded that the R71H mutation is associated with a milder form of the disorder.only milder forms of the disorder has been reported.	nervous system, eye	nervous system, eyes		decreased activity of Aspartoacylase in fibroblasts,increased N-Acetylaspartic acid in plasma,spinal fluid and urine.	enzyme		1 in 6,400 to 13,500 people in the Ashkenazi Jewish population.	Glyceryl triacetate Lithium citrate no specific treatment	medications	OMIM:271900	http://www.ncbi.nlm.nih.gov/bookshelf/br.fcgi?book=gene&part=canavan
Type I citrullinemia	amino acid disorders	amino acid metabolism	ASS1	ASS1	445	1	ARGSS	1	1	autosomal recessive	autosomal recessive	1)Classic neonatal-onset CTLN1. 2)Milder, adult-onset citrullinemia type I.	nervous system	nervous system		elevated blood ammonia.increased citrulline and glycine in plasma.in urine-elevated levels of citrulline,glycine and orotic acid.	amino acid	blood ammonia-25.00-80.00 µmol/l, plasma-citrulline(10.00-45.00 µmol/l),plasma glycine( 232.00-740.00 µmol/l ), serum transaminases(10.00-30.00 U/l), in urine-citrulline(27.00-181.00 µmol/l ),glycine(-950.00 mmol/mol creatinine),orotic acid(0.00-11.00 mmol/mol creatinine)-metabolic information centre	Type I citrullinemia is the most common form of the disorder, affecting about 1 in 57,000 people worldwide	arginine-HCl glucose infusion (acute) hemofiltration/hemodialysis/peritonealdialysis low-protein diet sodium benzoate sodium phenylbutyrate	diet	OMIM:215700	http://www.ncbi.nlm.nih.gov/bookshelf/br.fcgi?book=gene&part=ctlm
AICA-ribosiduria	nucleotide metabolism	nucleotide metabolism	ATIC	ATIC	471	1	AICART,IMPC	2	2			ATIC, LYS426ARG,ATIC, 125-129DUP, 130-132DEL are the known mutations resulting in AICA-RIBOSIDURIA DUE TO ATIC DEFICIENCY.	nervous system, eye	nervous system, eyes								OMIM:608688	PMID: 15114530
renal tubular acidosis (RTA)	transporter defect	transporter defect	ATP6V1B1	ATP6V1B1	525	1	ATPasel	1	1	autosomal recessive	autosomal recessive		kidney	kidneys								OMIM:267300
3-methylglutaconic aciduria type I	organic acid disorders	amino acid metabolism	AUH	AUH	549	1	MGCHrm	1	5	autosomal recessive	autosomal recessive	There are five types of 3-methylglutaconic aciduria numbered I, II, III, IV, and V. Types I-III and V are caused by mutations in four different genes and have distinct signs and symptoms. The genetic cause of 3-methylglutaconic aciduria type IV has not been established. The common link among all types of 3-methylglutaconic aciduria is the excretion of large amounts of 3-methylglutaconic acid and …	nervous system	CNS	OMIM:250950	in urine-elevated 3-hydroxyisovaleric acid,3-methylglutaric acid,3-methylglutanoic acid etc.	fatty acid	3-Hydroxyisovaleric acid -0.00-46.00 mmol/mol creatinine,3-Methylglutaconic acid -0.00-9.00 mmol/mol creatinine, 3-Methylglutaric acid -0.00-7.00 mmol/mol creatinine in urine(metabolic information centre)	Fewer than 20 cases	low-protein diet	diet		The American Journal of Human Genetics, Volume 71, Issue 6, 1463-1466, 1 December 2002 doi:10.1086/344712
familial hypercholanemia (FHCA)	bile acid metabolism	bile acid metabolism	BAAT	BAAT	570	1	BAAT1x,BAAT2x,BAAT3x,BAAT4x,BAAT5x,	6	5				liver, bile canaliculi	liver,bile canaliculi		elevated serum bile acid concentrations, itching, and fat malabsorption.	porphyrin			ursodeoxycholic acid	medications	OMIM:607748	PMID: 12704386
Biotinidase deficiency	amino acid disorders	amino acid metabolism	BTD	BTD	686	1	BTND1,BTND1n,BTNDe,BTNDm	4	4	autosomal recessive	autosomal recessive	profound biotinidase deficiency alleles,carriers of profound biotinidase deficiency,compound heterozygotes	muscle, nervous system	muscles,nervous system	Gaudry et al. (1983) confirmed biotinidase deficiency in a patient with multiple carboxylase deficiency and showed that the deficiency is present also in liver.	in blood- inceased C5OH,NH3,ketone bodies. In urine-increased 3-hydroxyisovaleric acid,3-hydroxypropionic acid,3-methylcrotonylglycine,methylcitiric acid,acylcarnitine,lactate.	acylcarnitine	in plasma-3-Hydroxyisovaleric acid(0.00-19.00 µmol/l), in spinal fluid-2-Hydroxybutyrate (11.00-86.00 µmol/l),3-Hydroxybutyrate(20.00-60.00 µmol/l ),3-Hydroxyisovaleric acid (0.00-18.00 µmol/l ),3-Hydroxypropionic acid (0.00-9.50 µmol/l),Citrate (90.00-590.00 µmol/l),Lactate(0.50-2.10 mmol/l). in urine-3-Hydroxyisovaleric acid (0.00-46.00 mmol/mol creatinine ),3-Hydroxypropionic acid(3.00-10.00 m…	1 in 60,000 newborns	biotin	medications	OMIM:253260	http://www.ncbi.nlm.nih.gov/bookshelf/br.fcgi?book=gene&part=biotin
carnitine acylcarnitine translocase deficiency	fatty acid disorders	lipid metabolism	SLC25A20	SLC25A20	788	1	C9BRxtc, C110CPT2m, C2tcx, C2tmc, C3tcx, C3tmc, C4tcx, C4tmc, C6CRNtcx, LNLCCRNCACT, LNELDCRNCACT, GLNLNCRNCACT, ALNLNCRNCACT, OCD11CRNCACT, STCRNCACT, TDCRNCACT, PDCRNCACT, PMCRNCACT, HPDCRNCACT, ARCRNCACT, DGLCRNCACT, ARHDCRNCACT, TMDCRNCACT, ADRCRNCACT, DCPCRNCACT, C226CRNCACT, THD2CRNCACT, C161CACT, C181CACT, STDCRNCACT	30	45	autosomal recessive	autosomal recessive	neonatal onset and milder form with some residual CACT activity.	liver, muscle, heart	liver,muscle,heart	Morris et al. (1998) reported steatosis of renal tubules in a pakistani family. Huizing et al. (1998) found high level of CACT mRNA transcripts in in heart, skeletal muscle, and liver, and much lower levels in brain, placenta, kidney, pancreas, and espescially in lung.-OMIM:212138	elevated C-16 and C-18:1	acylcarnitine	Carnitine-acylcarnitine translocase in fibroblast-0.74-1.02 pmol/min/mg protein,Carnitine, total in plasma-40.00-60.00 µmol/l(metabolic information centre)	30 cases have been confirmed till date	medium-chain triglycerides (MCT)	diet		Postepy Hig Med Dosw,2009,63:266-277
acatalasemia	catalase enzyme	catalase enzyme	CAT	CAT	847	1	CATm, CATp	2	3			2 types. type I japanese variant of low specific activity and type II swiss variant of low stability relatively benign disease.		no clinical signs and symptoms.		decreased activity of Catalase in erythrocytes.	enzyme		1:25000 - 250000	no specific treatment	no treatment	OMIM:115500
Carbamoyl phosphate synthetase I deficiency	amino acid disorders	amino acid metabolism	CPS1	CPS1	1373	1	CBPSam	1	1	autosomal recessive	autosomal recessive	1)Early-Onset Form-congenital hyperammonemia and decreased levels of carbamoyl phosphate synthetase. 2)Delayed-Onset Form- 3 patients were described aged 9,32 and 26 years.	nervous system	nervous system		in plasma-decreased citrulline, increased glutamine. In urine-transient increase of 5-oxoproline, increase lysine,glycine and uracil.	amino acid	plasma-citrulline-10.00-45.00 µmol/l ,glutamine-376.00-709.00 µmol/l,serum urea nitrogen-1.80-6.40 mmol/l. In urine-glycine-950.00 mmol/mol creatinine,lysine- 7.00-29.00 mmol/mol creatinine,uracil-2.00-22.00 mmol/mol creatinine(metabolic information centre)	1 in 800,000 newborns in Japan	amino acid mixture arginine-HCl citrulline glucose infusion (acute) hemofiltration/hemodialysis/peritonealdialysis liver transplantation low-protein diet sodium benzoate sodium phenylbutyrate	TP	OMIM:237300	http://www.ncbi.nlm.nih.gov/bookshelf/br.fcgi?book=gene&part=ucd-overview
CPT-1 deficiency	fatty acid disorders	lipid metabolism	CPT1A	CPT1A	1374	1	FAOXC3DC, C16DCc, C10DCc, C8DCc, C6DCc, FAOXC4C4DCc, FAOXC5C5DCc, C10OHc, C12OHc, C14OHc, C18OHc, FAOXC5OHc, C4OHc, C16OHc, C161OHc, C181OHc, C182OHc, C20CPT1, C30CPT1, C51CPT1, C40CPT1, C50CPT1, C60CPT1, C81CPT1, C80CPT1, C102CPT1, C101CPT1, C100CPT1, C120CPT1, C121CPT1, C142CPT1, C141CPT1, C140CPT1, C160CPT1c, C161CPT1c, LNELDCCPT1c, ELAIDCPT1c, C180CPT1, LNLCCOACPT1, LNELDCOACPT1, GLNLNCOACPT1…	56	71	autosomal recessive	autosomal recessive	Hepatic encephalopathy,Adult-onset myopathy,Acute fatty liver of pregnancy	liver, nervous system, muscle, skeletal system	liver,nervous system,musculo-skeletal system.	kidney{Renal tubular acidosis, both proximal and distal, was noted by Falik-Borenstein et al. (1989)}-OMIM:255120	free carnitine/total carnitine is elevated,palmitoylcarnitine/free carnitine,C0/(C16+C18)	acylcarnitine	total serum carnitine: 25-69 µmol/L(http://www.ncbi.nlm.nih.gov/bookshelf/br.fcgi?book=gene&part=cpt1a),CPT1A enzyme activity is 0.58±0.11 nmol/min/mg fibroblast protein [Bennett et al 2004]	>30 cases reported.Alaskan population 1.3:1,000 live births	avoidance of fasting cornstarch, uncooked medium-chain triglycerides (MCT)	diet	http://www.ncbi.nlm.nih.gov/bookshelf/br.fcgi?book=gene&part=cpt1a	Postepy Hig Med Dosw,2009,63:266-277,Hum Genet(2002) 111:179-189,seminars in fetal and neonatal medicine 15 (2010) 122-128
CPT-2 deficiency	fatty acid disorders	lipid metabolism	CPT2	CPT2	1376	1	LNLCCRNCPT2, LNELDCRNCPT2, GLNLNCRNCPT2, ALNLNCRNCPT2, OCD11CRNCPT2, STCRNCPT2,TDCRNCPT2, PDCRNCPT2, PMCRNCPT2, HPDCRNCPT2, ARCRNCPT2, DGLCRNCPT2, ARHDCRNCPT2, TMDCRNCPT2, ADRCRNCPT2, DCPCRNCPT2, C226CRNCPT2, THD2CRNCPT2, C161CPT2m, C181CPT2m, STDCRNCPT2	21	36	autosomal recessive	autosomal recessive	Lethal neonatal form,Severe infantile hepatocardiomuscular form,Myopathic form	liver, heart, muscle, nervous system, kidney	liver,heart,muscles,brain,kidneys.	in infantile form-reduced enzyme acyivity in fibroblasts, lymphoblasts, and skeletal muscle-OMIM:600649, in lethal neonatal form- Postmortem examination showed diffuse lipid accumulation in the liver, heart, kidney, adrenal cortex, skeletal muscle, and lungs-OMIM:608836	elevated C-16 and C-18:1 along with urinary examination.	acylcarnitine	long chain acyl carnitines in plasma-0.00-7.00 µmol/l(metabolic information centre),L-Palmitoylcarnitine-0.097 +/- 0.006 umol/L in blood of >18yrs adult(metabolic information centre),	lethal neonatal-18 families,infantile hepatocardiomuscular-28 families,myopathic form >300 cases.	avoidance of fasting medium-chain triglycerides (MCT)	diet	http://www.ncbi.nlm.nih.gov/bookshelf/br.fcgi?book=gene&part=cpt2	seminars in fetal and neonatal medicine 15 (2010) 122-128,Postepy Hig Med Dosw,2009,63:266-277,
Cystathioninuria	amino acid disorders	amino acid metabolism	CTH	CTH	1491	1	CYSTGL,SELCYSTGL	2	2	autosomal recessive	autosomal recessive		nervous system	nervous system		large amounts of cystathionine in urine after methionine ingestion	amino acid		1 per 14,000 live births (Wong et al., 1979)	vitamin B	medications	OMIM:219500
congenital lipoid adrenal hyperplasia (CLAH)/ StAR DEFICIENCY	hormone metabolism	hormone metabolism	CYP11A1	CYP11A1	1583	1	P45011A1m	1	1	autosomal recessive	autosomal recessive	The several types of adrenal hyperplasia can be numbered I through V in order of the steps in the synthetic pathway. Adrenal hyperplasia type I is characterized in the male by various degrees of hypospadias or even almost complete failure of the external genitalia to undergo masculine development.	adrenals, gonads	adrenal glands, testis.		decreased steroids in urine. In plasma significant increase in Adrenocorticotropic hormone (ACTH). In plasma decrease in 17-Hydroxy-Progesteron , Androstendione , Corticosterone , Cortisol , Dehydroepiandrosterone (DHEA) , Deoxycorticosterone (DOC) and Steroids.	steroid	normal ACTH=4.40-22.20 pmol/l.	CLAH is a rare disease, except in Japan and Korea where it accounts for a significant percentage of cases of congenital adrenal hyperplasia.	corticosteroids mineralocorticoid sodium chloride	medications	OMIM:201710	PMID: 8948562
congenital adrenal hyperplasia	hormone metabolism	hormone metabolism	CYP11B1	CYP11B1	1584	1	P45011B11m ,P45011B12m	2	2	autosomal dominant	autosomal dominant	Familial hyperaldosteronism is categorized into three types. 1)Familial hyperaldosteronism type I, in which hypertension generally appears in childhood, can be treated with certain steroid medications called glucocorticoids, and so it is also known as glucocorticoid-remediable aldosteronism (GRA). 2)In familial hyperaldosteronism type II, hypertension usually appears in early to middle adulthood …	kidney, heart	kidney, heart	Familial hyperaldosteronism type I is caused by the abnormal fusion of two similar genes called CYP11B1 and CYP11B2, which are located close together on chromosome 8. These genes provide instructions for making two enzymes that are found in the adrenal glands.	increased levels of tetrahydro-11-deoxycortisol in the amniotic fluid	steroid					OMIM:202010	PMID: 18661760, http://ghr.nlm.nih.gov/condition/familial-hyperaldosteronism
corticosterone methyloxidase type 1 deficiency (CMO-1 deficiency)/aldosterone deficiency due to defect in 18-hydroxylase/aldosterone deficiency I	hormone metabolism	hormone metabolism	CYP11B2	CYP11B2	1585	1	P45011B21m	1	1	autosomal recessive	autosomal recessive	2 types. 1)In CMO I deficiency, aldosterone is undetectable, whereas its immediate precursor, 18-OHB, is low or normal. These patients have an increased ratio of corticosterone to 18-OHB (Portrat-Doyen et al., 1998). 2)In CMO II deficiency, aldosterone can be low or normal, but at the expense of increased secretion of 18-OHB. These patients have a low ratio of corticosterone to 18-OHB (Portrat-Do…	adrenals	adrenal glands and the juxtaglomerular apparatus.		in plasma-low 18-Hydroxycorticosterone and nondetectable Aldosterone. In serum- high Potassium and low sodium.	steroid			mineralocorticoid	medications	OMIM:203400	PMID: 11595502
adrenal hyperplasia type 5 (AH5)	hormone metabolism	hormone metabolism	CYP17A1	CYP17A1	1586	1	P45017A1r,P45017A2r,P45017A3r,P45017A4r	4	4										Yanase et al. (1991) stated that at least 122 cases of 17-alpha-hydroxylase deficiency had been reported.			OMIM:202110	PMID: 12626862
familial gynecomastia	hormone metabolism	hormone metabolism	CYP19A1	CYP19A1	1588	1	P45019A1r,P45019A2r	2	2	X-linked recessive or autosomal dominant, male-limited inheritance	X-linked or autosomal dominant		adrenals, breast	adrenal glands, breast		in plasma-increased Androstendione ,Follicle stimulating hormone (FSH) ,Luteinizing hormone (LH) and Testosterone where as low Estradiol	steroid			estradiol, transdermal	medications	OMIM:139300 , OMIM:107910	PMID: 19408804
Cerebrotendinous xanthomatosis	lipid disorder/cholesterol disorder	lipid metabolism	CYP27A1	CYP27A1	1593	1	P45027A11m,P45027A12m, P45027A13m,P45027A14m,P45027A15m,P45027A16m,P45027A1m,VITD2Hm,VITD3Hm	9	9	autosomal recessive	autosomal recessive	Several authors have attempted to correlate genotype to phenotype, but no correlation has been identified [Dotti et al 1996; Verrips, van Engelen, Wevers et al 2000]. The interaction of many genes and other factors may influence the clinical presentation.	nervous system, muscle, eye, skeletal system	nervous system (brain), muscles, eye, bones		Cholestanol in plasma and Bile alcohols in urine and plasma.normal-to-low plasma cholesterol concentration; decreased chenodeoxycholic acid; increased concentration of bile alcohols and their glyconjugates; and increased concentrations of cholestanol and apolipoprotein B in cerebrospinal fluid.	cholesterol		The incidence of cerebrotendinous xanthomatosis is estimated to be 3 to 5 per 100,000 people worldwide. This condition is more common in the Moroccan Jewish population with an incidence of 1 in 108 individuals.	Long-term treatment of individuals with CTX with chenodeoxycholic acid (CDCA) normalizes bile acid synthesis, normalizes plasma and CSF concentration of cholestanol, and improves neurophysiologic findings; however, CDCA is only available in Italy. Inhibitors of HMG-CoA reductase alone or in combination with CDCA are also effective in decreasing cholestanol concentration and improving clinical sig…	medications	OMIM:213700	http://www.ncbi.nlm.nih.gov/bookshelf/br.fcgi?book=gene&part=ctx
Aromatic L-amino acid decarboxylase deficiency	amino acid disorders	amino acid metabolism	DDC	DDC	1644	1	3HLYTCL,3HXKYNDCL,5HLTDL,5HXKYNDCL,LTDCL,PHYCBOXL,TYRCBOX	7	8	autosomal recessive	autosomal recessive		muscle, nervous system	muscles,autonomic nervous system		in plasma-3-methoxytyrosine,5-hydroxytryptophan,DOPA and decreased adrenalin,noradrenalin and aromatic aminoacid decarboxylase activity. In urine-increased 3-methoxytyramine,3-methoxytyrosine,5-hydroxytryptophan,dopamine and DOPA.	amino acid	in spinal fluid-Homovanillic acid -100.00-900.00 nmol/l(metabolic information centre)	Only about 30 people with this condition have been identified worldwide.	bromocriptine L-Dopa pergolide pyridoxal-5-phosphate tranylcypromine Vitamin B6 (pyridoxine)	medications	OMIM:608643	PMID: 20505134
Deoxyguanosine kinase deficiency	nucleotide metabolism	nucleotide metabolism	DGUOK	DGUOK	1716	1	DGNSKm	1	1	autosomal recessive	autosomal recessive	1)severe neurological form and 2)milder hepatic form.	liver, nervous system, muscle, kidney	liver, nervous system, muscle, kidney		elevated blood Lactate,in serum-increaesd Creatinine kinase and Transaminases. In urine-increaesd amounts of dicarboxylic acids.	organic acid		The prevalence of deoxyguanosine kinase deficiency is unknown. Approximately 100 affected individuals have been identified.	Management of liver disease-medium-chain-triglyceride,Cornstarch,Fractional meals and enteral nutrition during the night,Orthotopic liver transplantation.	TP	OMIM:251880	http://www.ncbi.nlm.nih.gov/bookshelf/br.fcgi?book=gene&part=dguok-mtddepl
Smith-Lemli-Opitz syndrome	lipid(cholesterol) disorder	lipid metabolism	DHCR7	DHCR7	1717	1	DHCR71r,DHCR72r	2	2	autosomal recessive	autosomal recessive	1)Witsch-Baumgartner et al (2000) found a general correlation in severity, depending on whether the mutation was a putative null mutation, a mutation in the large cytoplasmic domain, a transmembrane domain mutation, or a C-terminal mutation. However, the significant variation seen in severity, even among individuals with similar mutations, suggests significant influences on phenotype other than t…	nervous system, muscle	nervous system, muscles		in plasma-increased 7-Dehydrocholesterol,8-Dehydrocholesterol and decreased Cholesterol. Increased serum transaminases. Significant decrease in 7-Dehydrocholesterol reductase in liver microsomes. In urine-3-Methylglutaconic acid.	cholesterol		Smith-Lemli-Opitz syndrome affects an estimated 1 in 20,000 to 60,000 newborns. This condition is most common in Caucasians (whites) of European ancestry, particularly people from Central European countries such as Slovakia and the Czech Republic. It is very rare among African and Asian populations.	chenodeoxycholic acid cholesterol Simvastatin ursodeoxycholic acid	no treatment	OMIM:270400	http://www.ncbi.nlm.nih.gov/bookshelf/br.fcgi?book=gene&part=slo
Dihydrofolate reductase deficiency	amino acid disorders	amino acid metabolism	DHFR	DHFR	1719	1	FOLR2,DHFR	2	2				nervous system	nervous system								OMIM:126060
Sarcosinemia	Urea cycle/amino group metabolism	amino acid metabolism	SARDH	SARDH	1757	1	SARDHm	1	1	autosomal recessive	autosomal recessive		nervous system, heart	nervous system, heart		high levels of Sarcosine in plasma and urine.	sarcosine		1/350,000 (50 cases have been reported)			OMIM:268900	PMID: 2420598
Dihyropyrimidine dehydrogenase deficiency	nucleotide metabolism	nucleotide metabolism	DPYD	DPYD	1806	1	DURAD,DURAD2	2	2	autosomal recessive	autosomal recessive	Dihyropyrimidine dehydrogenase deficiency shows large phenotypic variability, ranging from no symptoms to a convulsive disorder with motor and mental retardation in homozygous patients. In addition, homozygous and heterozygous mutation carriers can develop severe toxicity after the administration of the antineoplastic drug 5-fluorouracil (5FU), which is also catabolized by the DPYD enzyme.	nervous system	nervous system		in urine-elevated levels of 5-Hydroxymethyluracil,Thymine and uracil.	N-base		Sumi et al. (1998) identified asymptomatic dihydropyrimidinuria in 2 of 21,200 healthy Japanese urine samples, yielding a prevalence of approximately 1 in 10,000 births.	no specific treatment	no treatment	OMIM:274270	PMID: 6488556
Dihydropyrimidinuria	nucleotide metabolism	nucleotide metabolism	DPYS	DPYS	1807	1	DHPM1	1	1	autosomal recessive	autosomal recessive		nervous system	nervous system		in urine- high levels of Dihydrothymine ,Dihydrouracil,Thymine and uracil.	N-base			no specific treatment	no treatment	OMIM:222748	PMID: 11031984
Zellweger syndrome	fatty acid beta oxidation	lipid metabolism	EHHADH	EHHADH	1962	1	FAOXC16080x, FAOXC180x, FAOXC183806x, FAOXC18480x, FAOXC200180x, FAOXC2051843x, FAOXC2242046x, FAOXC2251836x, FAOXC2252053x, FAOXC226205x, FAOXC240200x, FAOXC241181x, FAOXC2442246x, FAOXC2452253x, FAOXC2452256x, FAOXC246226x, FAOXC260240x, PEROXx	18	71	autosomal recessiv	autosomal recessive		nervous system, liver, heart, eye, skeletal system, kidney	eye, liver, nervous system, heart, kidney, skeletal system		in fibroblast- increased C26:0, C26:0/C22:0, Plasmalogens, biosynthesis, decreased Dihydroxyacetone-phosphate acyltransferase (DHAPAT), Phytanic acid oxidation, in plasma- increased Bile acid intermediates, C24:0/C22:0, C26:0, C26:0/C22:0 , C26:1, Phytanic acid, Pipecolic acid. In platelest decreased Dihydroxyacetone-phosphate acyltransferase. In serum- increased iron, transaminases and very long…	fatty acid	in fibroblast- C26:0 (0.05-0.21 µg/mg), C26:0/C22:0 (0.02-0.13), Dihydroxyacetone-phosphate acyltransferase (1.60-3.40 nmol/2h/mg protein), Phytanic acid oxidation (5.30-18.80 % oxidized), Plasmalogen, biosynthesis (0.40-0.80 3H/14C). In plasma- C24:0/C22:0 (0.50-0.90), C26:0 (0.10-0.60 µg/ml), C26:0/C22:0 (0.01-0.02), C26:1 (0.02-0.51 µg/ml), phytanic acid (0.00-3.10 µg/ml), Pipecolic acid (0.80…	1 in 50,000 individuals	no specifc treatment	no treatment		PMID: 3469675, http://www.ncbi.nlm.nih.gov/books/NBK1448/
glycogen storage disease type 13 (GSD13)	carbohydrate disorder	carbohydrate metabolism	ENO3	ENO3	2027	1	ENO	1	1				muscle	muscles		increased serum creatine kinase, severe deficiency of muscle enolase activity.	enzyme					OMIM:612932	PMID: 12351996
fructose-1,6-bisphosphatase deficiency	carbohydrate disorder	carbohydrate metabolism	FBP1	FBP1	2203	1	FBP	1	2	autosomal recessive	autosomal recessive		respiratory system, heart, nervous system	respiratory system,heart, nervous system.		decreased Fructose 1,6 bisphosphatase in liver, in blood-increased lactate and ketone bodies(after 24 hrs fasting), increased alanine in plasma. In serum-glucose(after 24 hrs fasting) and uric acid increased. In urine- 3-Hydroxybutyric acid ,Glycerol and ketone bodies increased excretion.	enzyme			avoidance of fasting cornstarch, uncooked glucose infusion (acute) insulin sodium bicarbonate	medications	OMIM:229700	PMID: 7807945
Porphyria	heme biosythesis disorder	heme biosythesis disorder	FECH	FECH	2235	1	FCLTm	1	1	autosomal dominant or autosomal recessive	autosomal recessive or autosomal dominant		skin, nervous system, liver, gall bladder	skin, nervous system, liver, gall bladder		overproduction of protoporphyrin, free erythrocyte protoporphyrin (FEP) highly increase over 1,000 microg/dl. Reduction in activity of ferrochelatase to 10 to 25% of normal levels has been demonstrated (Bonkowsky et al., 1975; Bloomer, 1980).	porphyrin	FEP=60 microg/dl red cells	Gouya et al. (2006) found that the frequency of the IVS3-48C allele differed widely in the Japanese (43%), southeast Asian (31%), white French (11%), north African (2.7%), and black west African (less than 1%) populations. These differences could be related to the prevalence of EPP in these populations and may account for the absence of EPP in black subjects	Management includes avoidance of sunlight; skin protection by parenteral administration of beta-carotene has given equivocal results (Mathews-Roth et al., 1970; Corbett et al., 1977; Poh-Fitzpatrick, 1978). Liver disease may be ameliorated by treatment with cholestyramine (Bloomer, 1979).In 5 patients with erythropoietic protoporphyria, Harms et al. (2009) reported favorable results after treatme…	medications	OMIM:177000	http://ghr.nlm.nih.gov/condition/porphyria
Fucosidosis	carbohydrate disorder	carbohydrate metabolism	FUCA1	FUCA1	2517	1	FUCASEly,FUCASE2ly	2	2	autosomal recessive	autosomal recessive	In the past, researchers described two types of this condition based on symptoms and age of onset, but current opinion is that the two types are actually a single disorder with signs and symptoms that range in severity. Fucosidosis has been classified into 2 major types. Type 1 is characterized by rapid psychomotor regression and severe neurologic deterioration beginning at about 6 months of age,…	nervous system	brain		increased Chitotriosidase activity in plasma,increased sodium and chloride in sweat, in urine-increased Fucoglycopeptides and oligosaccharides.	enzyme		Fucosidosis is a rare condition; approximately 100 cases have been reported worldwide. This condition appears to be most prevalent in Italy, Cuba, and the southwestern United States	no specific treatment	no treatment	OMIM:230000	PMID: 17845186
Glycogen storage disease type II/Pompe disease	carbohydrate disorder	carbohydrate metabolism	GAA	GAA	2548	1	MALTly,MLTG1ly	2	2	autosomal recessive	autosomal recessive	p.Glu176ArgfsX45 (c.525delT) is an especially common mutation among the Dutch [Van der Kraan et al 1994]. It results in negligible GAA enzyme activity and must be considered one of the more severe alterations. Either in the homozygous state or in the compound heterozygous state with another severe mutation, p.Glu176ArgfsX45 predicts the infantile-onset form of Pompe disease, although the correlat…	muscle, liver, heart, respiratory system	muscles,liver,heart in classic form of infantile origin. No cardiac implications in non-classic form and late onset forms. Respiratory failure in both non-classic form and late-onset type.	In classic cases of Pompe disease tongue may be enlarged.	increased oligosaccharides in urine.	carbohydrate		1 in 40,000 people in the United States	enzyme replacement therapy supportive/symptomatic therapy	enzyme therapy	OMIM:232300	http://www.ncbi.nlm.nih.gov/bookshelf/br.fcgi?book=gene&part=gsd2
Krabbe disease	Sphingolipid Metabolism	lipid metabolism	GALC	GALC	2581	1	GALC	1	1	autosomal recessive	autosomal recessive	1)Infantile form and 2)Late-onset forms.	nervous system, muscle	nervous system, muscles		decreased activity of Galactosylceramidase in fibroblast and leucocytes. Increaesd protein in spinal fluid.	enzyme		In the United States, Krabbe disease affects about 1 in 100,000 individuals. A higher incidence (6 cases per 1,000 people) has been reported in a few isolated communities in Israel.	bone marrow transplantation hemopoietic stem cell transplantation morphine no specific treatment supportive/symptomatic therapy	TP	OMIM:245200	http://www.ncbi.nlm.nih.gov/bookshelf/br.fcgi?book=gene&part=krabbe
Galactosemia type III	carbohydrate disorder	carbohydrate metabolism	GALE	GALE	2582	1	UDPG4E, UAG4E	2	2	autosomal recessive	autosomal recessive		eye, nervous system, liver, kidney	eye,nervous system,liver,kidney	Holton et al. (1981) reported a Pakistani baby with a severe form of galactosemia due to epimerase deficiency. The patient presented in the newborn period with clinical symptoms similar to classic galactosemia, including jaundice, vomiting, hypotonia, failure to thrive, hepatomegaly, moderate generalized amino aciduria and marked galactosuria. Henderson et al. (1983) provided further information …	increased galactose in serum.	carbohydrate		type III appears to be very rare.In Japan, Misumi et al. (1981) found the incidence of complete absence of galactose epimerase activity to be 1 in 23,000. They stated that reports of galactose epimerase deficiency had come only from Switzerland and Japan. However, nearly simultaneously, from England Holton et al. (1981) reported a baby with a severe form of galactosemia due to epimerase deficienc…	patients with galactose epimerase deficiency cannot utilize the endogenous pathway for synthesis of UDP-galactose, making them dependent on exogenous galactose; thus, a galactose-restricted rather than a galactose-free diet is recommended in the management of this disorder (Walter et al., 1999). The clear dual function of this enzyme suggests that dietary supplements with both galactose and N-ace…	diet	OMIM:230350	http://www.ncbi.nlm.nih.gov/bookshelf/br.fcgi?book=gene&part=galactosemia
Galactosemia type II	carbohydrate disorder	carbohydrate metabolism	GALK1	GALK1	2584	1	GALK	1	1	autosomal recessive	autosomal recessive		eye	eye		increased galactose in serum. In urine-increased galactose and reducing substance.	carbohydrate		1 in 100,000 newborns	galactose-free diet	diet	OMIM:230200	http://www.ncbi.nlm.nih.gov/bookshelf/br.fcgi?book=gene&part=galactosemia
Mucopolysaccharidosis type IV type A/Morquio syndrome	carbohydrate disorder	carbohydrate metabolism	GALNS	GALNS	2588	1	GALASE10ly,GALASE11ly,GALASE12ly,GALASE13ly,GALASE14ly,GALASE15ly,GALASE16ly ,GALASE17ly ,GALASE18ly,GALASE19ly,GALASE1ly,GALASE20ly,GALASE3ly,GALASE4ly,GALASE5ly,GALASE6ly,GALASE7ly,GALASE8ly,GALASE9ly,GLB1,LACZly,S6TASE10ly,S6TASE22ly,S6TASE25ly,S6TASE4ly,S6TASE5ly,S6TASE6ly,S6TASE7ly,S6TASE8ly,S6TASE9ly,SIAASE2ly,SIAASE3ly,SIAASE4ly,SIAASEly	34	34	autosomal recessive	autosomal recessive	1)mild phenotype with considerable residual activity-1.3-13.3% of wildtype GALNS activity. 2)severe phenotype had no enzyme activity.	skeletal system, eye, respiratory system, ears, heart, liver	skeletal system,eye(cornea),respiratory system,ear,heart,liver		in fibroblast reduced N-Acetylgalactosamin-6-sulfate sulfatase activity.in urine-increased Chondroitin-6-sulfate ,Keratan sulfate ,Mucopolysaccharides	enzyme		1 in 200,000 to 300,000 individuals.	no specific treatment supportive/symptomatic therapy	no treatment	OMIM.253000	PMID: 18456538
hyperphosphatemic familial tumoral calcinosis (HFTC)	O-Glycan Biosynthesis	carbohydrate metabolism	GALNT3	GALNT3	2591	1	GALNTg	1	1	autosomal recessive	autosomal recessive		skeletal system	bone		hyperphosphatemia caused by increased renal absorption of phosphate due to loss-of-function mutations in the FGF23 or GALNT3 gene. HFTC is considered to be the clinical converse of autosomal dominant hypophosphatemic rickets (ADHR; 193100)				low-phosphorus diet combined with large oral doses of aluminum hydroxide.	diet	OMIM:211900	PMID: 20358599
Classic galactosemia/type 1	carbohydrate disorder	carbohydrate metabolism	GALT	GALT	2592	1	UGLT,GALT	2	2	autosomal recessive	autosomal recessive	1).Substitution of an arginine for a glutamine at amino acid position 188 (p.Gln188Arg) accounts for approximately 70% of the G alleles in the Caucasian population of northern European ethnicity.2).homozygous state-increased risks for ovarian failure and dyspraxic speech.3)Duarte variant-bioinstability to the GALT enzyme.4)p.Ser135Leu allele- leucine is substituted for serine at amino acid 135, i…	liver, eye, nervous system	liver,eye,nervous system		in plasma-increased galactitol. In serum-increased bilirubin,chloride,galactose-1-phosphate and transaminases. In urine-incresed galactitol,galactose,total protein and reducing substances.	carbohydrate	Hb-12.00-20.00 g/dl, plasma-Galactitol 0.08-0.86 µmol/l, galactose( 0.00-200.00 nmol/ml),in serum-bilirubin(3.40-17.00 µmol/l),chloride(97.00-110.00 mmol/l ),gal-1-phosphate(0.00-0.30 mg/dl), glucose( 2.80-5.00 mmol/l),transaminases(Transaminases ). In urine-Galactitol(3.00-81.00 mmol/mol creatinine),galactose(0.00-1100.00 nmol/ml),protein(50.00-80.00 mg/24 hr)-metabolic informtaion centre	1 in 30,000 to 60,000 newborns	antibiotics galactose-free diet supportive/symptomatic therapy vitamin K	medications	OMIM:230400	http://www.ncbi.nlm.nih.gov/bookshelf/br.fcgi?book=gene&part=galactosemia
arginine:glycine amidinotransferase deficiency	amino acid disorders	amino acid metabolism	GATM	GATM	2628	1	GLYAMDTRc	1	1	autosomal recessive	autosomal recessive	The phenotype of individuals homozygous for the two most common GAMT mutations (c.59G>C and c.327G>A) ranges from mild to severe.	nervous system	nervous system		decreased Creatine and Guanidinoacetate in plasma and urine.	NPN		Approximately 37 individuals with GAMT deficiency have been diagnosed worldwide.	creatine monohydrate	medications	OMIM:612718	PMID: 11555793
Gaucher disease	carbohydrate disorder	carbohydrate metabolism	GBA	GBA	2629	1	GBA	1	2	autosomal recessive	autosomal recessive	1)Type 1 Gaucher disease is the most common form of this condition. Type 1 is also called non-neuronopathic Gaucher disease because the brain and spinal cord (the central nervous system) are usually not affected. The features of this condition range from mild to severe and may appear anytime from childhood to adulthood. 2)Types 2 and 3 Gaucher disease are known as neuronopathic forms of the disor…	liver, spleen, RBC, respiratory system, skeletal system, nervous system, heart, eye	in type 1-liver,spleen,RBC,lungs,bones. Type 2 and 3-central nervous system(brain and spinal cord). In the cardiovascular type-heart,eyes,bones and spleen.		Glucocerebrosidase activity decreases in both fibroblast and leucocytes. In type 1 the bleeding time is prolonged.	enzyme		Gaucher disease occurs in 1 in 50,000 to 100,000 people in the general population. Type 1 is the most common form of the disorder, and occurs more frequently in people of Ashkenazi (eastern and central European) Jewish heritage than in those with other backgrounds. This condition affects 1 in 500 to 1,000 people of Ashkenazi Jewish heritage. The other forms of Gaucher disease are uncommon, and do…	enzyme replacement therapy splenectomy substrate reduction therapy (SRT)	enzyme therapy	OMIM:230800, OMIM:230900, OMIM:231000 and OMIM:231005	http://www.ncbi.nlm.nih.gov/bookshelf/br.fcgi?book=gene&part=gaucher
Glycogen storage disease type IV/Andersen´s disease	carbohydrate disorder	carbohydrate metabolism	GBE1	GBE1	2632	1	GLBRAN	1	1	autosomal recessive	autosomal recessive	6 types. 1)Classic Hepatic Form, 2)Nonprogressive Hepatic Form, 3)Fatal Perinatal Neuromuscular Form, 4)Fatal Perinatal Neuromuscular Form, 5)Childhood Neuromuscular Form and 6)Adult Neuromuscular Form with Isolated Myopathy	liver, heart, muscle, respiratory system	liver,heart, muscle, lungs		decreased fasting glucose in blood. Decreased activity of alpha-1,4 glucan-6-alpha-glucosyltransferase in alpha-1,4 glucan-6-alpha-glucosyltransferase , fibroblasts, leucocytes, liver and muscle. Increased activity of Chitotriosidase in plasma.	enzyme	normal fasting glucose=Normal: 3.30-5.50 mmol/l	1:1000.000	cornstarch, uncooked gastric drip feeding at night liver transplantation	TP	OMIM:232500
glutaric acidemia type I.	organic acid disorders	amino acid metabolism	GCDH	GCDH	2639	1	GLUTCOADHm	1	1	autosomal recessive	autosomal recessive		nervous system	brain, particularly the basal ganglia	Strauss et al. (2003) reported nonketosis GA-I give rise to myopathy, cardiomyopathy, and Reye-like hepatocerebral crisis.-OMIM:231670	increased C5DC in blood, in urine-increased C4OH,C5DC etc.	acylcarnitine	2-Hydroxyglutaric acid -0.00-1.50 µmol/l in blood(metabolic information centre)	1 of every 30,000 to 40,000 individuals , 1 in 300 newborns in Amish community and Ojibwa population of Canada	amino acid mixture anticholinergic drugs anticonvulsants botulinum toxin glucose infusion (acute) L-carnitine low-protein diet riboflavin	diet		http://www.medscape.com/viewarticle/501097
glycerol kinase deficiency	glycerol metabolism	lipid metabolism	GK	GK	2710	1	GLYK,GLYKm	2	2	X-linked	X-linked	3 types: 1) complex glycerol kinase deficiency, Xp21 contiguous gene syndrome 2) juvenile form 3) benign or adult form	digestive system, nervous system	gastro-intestinal system, nervous sytem		increased serum Creatinine kinase and glycerol. Increased Glycerol in urine.	lipid	serum CK(40.00-400.00 U/l),serum glucose( 2.80-5.00 mmol/l),serum glycerol(0.02-0.27 mmol/l), in urine glycerol( 0.00-40.00 mmol/mol creatinine)-metaboilc information centre	rare >50 cases	corticosteroids glucose infusion (acute) mineralocorticoid	medications	OMIM:307030	PMID: 8651297
Fabry disease	lysosomal disorder	carbohydrate metabolism	GLA	GLA	2717	1	GLAl	1	1	X-linked	X-linked	1)classic phenotype 2)later-onset atypical variants 3)Three mutations (Arg112His, Arg301Gln, and Gly328Arg) have been identified in individuals with both the classic phenotype and the cardiac variant phenotype, suggesting that other modifying factors are involved in disease expression [Ashton-Prolla et al 2000].	skin, eye, kidney, heart	skin, eye, kidney, heart		alpha-Galactosidase A decreased activity in tears and plasma. Globotriaosylceramide levels increases in plasma. In urine-increased amounts of Globotriaosylceramide and total protein.	enzyme		Fabry disease affects an estimated 1 in 40,000 to 60,000 males. This disorder also occurs in females, although less frequently. Milder, late-onset forms of the disorder are probably more common than the classic, severe form.	carbamazepin diphenylhydantoin enzyme replacement therapy kidney transplantation morphine	enzyme therapy,TP	OMIM:301500	http://www.ncbi.nlm.nih.gov/bookshelf/br.fcgi?book=gene&part=fabry
Gamma-glutamylcysteine synthetase deficiency	amino acid disorders	amino acid metabolism	GCLC	GCLC	2729	1	GLUCYS	1	1	autosomal recessive	autosomal recessive		nervous system	nervous system								OMIM:230450	http://www.orpha.net/data/patho/GB/uk-cysteine.pdf
Mucopolysaccharidosis type III D/Sanfilippo syndrometype III D	lysosomal disorder	carbohydrate metabolism	GNS	GNS	2799	1	S6TASE11ly,S6TASE12ly,S6TASE13ly,S6TASE14ly, S6TASE15ly,S6TASE16ly,S6TASE17ly,S6TASE18ly,S6TASE19ly,S6TASE1ly,S6TASE20ly,S6TASE21ly,S6TASE23ly,S6TASE24ly,S6TASE26ly,S6TASE2ly,S6TASE3ly	17	17	autosomal recessive	autosomal recessive	Types A, B, C, D	nervous system, liver, spleen, skeletal system	brain, liver, spleen, joints		high percentage of heparan sulfate in the urinary glycosaminoglycans and severe deficiency of N-acetylglucosamine-6-sulfate sulfatase in cultured skin fibroblasts	enzyme					OMIM:252940
Glutathione synthetase deficiency and 5-oxoprolinuria	amino acid disorders	amino acid metabolism	GSS	GSS	2937	1	GTHS	1	1	autosomal recessive	autosomal recessive	1) Mild glutathione synthetase deficiency-usually results in the destruction of red blood cells (hemolytic anemia). 2)moderate glutathione synthetase deficiency-symptoms begine shortly after birth including hemolytic anemia, 5-oxoprolinuria, and elevated acidity in the blood and tissues (metabolic acidosis). 3)severe form-experience neurological symptoms. 4)Some people with severe glutathione syn…	nervous system, muscle	nervous system, muscles		Glutathione synthetase decreased activity in erythrocytes and fibroblast. In plasma-decreased 5-Oxoproline, presence of abnormal Cysteinyl leukotrienes (LTC4, LTD4, LTE4),Cystinylglycine is absent and increased amounts of proline. In urine-5-Oxoproline and Cysteinyl leukotrienes (LTC4, LTD4, LTE4).	enzyme		Glutathione synthetase deficiency is very rare. This disorder has been described in about 70 people worldwide.	N-acetylcysteine vitamin C (ascorbate)	medications	OMIM:266130, OMIM:231900	Scriver's Online Metabolic and Molecular Bases of Inherited Disease (OMMBID): Glutathione Synthetase Deficiency and Other Disorders of the γ-Glutamyl Cycle, http://ghr.nlm.nih.gov/condition/glutathione-synthetase-deficiency, PMID: 1770788
Tyrosinemia, type Ib	amino acid disorders	amino acid metabolism	GSTZ1	GSTZ1	2954	1	MACACI	1	1	autosomal recessive	autosomal recessive											OMIM:603758	http://www.springerlink.com/content/ef5h29ayrhc8ppvk/fulltext.pdf
Mucopolysaccharidosis type VII/ Sly syndrome	carbohydrate disorder	carbohydrate metabolism	GUSB	GUSB	2990	1	GLCAASE1ly,GLCAASE4ly,GLCAASE5ly,GLCAASE6ly,GLCAASE7ly,GLCAASE8ly ,GLCAASE9ly	7	7	autosomal recessive	autosomal recessive	1)The most severe cases of MPS VII are characterized by hydrops fetalis.Most babies with hydrops fetalis are stillborn or die soon after birth.2)Other people with MPS VII typically begin to show signs and symptoms of the condition during early childhood.3) Some affected individuals may live into adolescence or adulthood.	nervous system, liver, spleen, heart, eye, skeletal system	brain,liver,spleen,heart,eye,skeletal system		decreased activity of beta-Glucuronidase in fibroblast. In urine-increased excretion of Chondroitin 4/6 sulfate and Mucopolysaccharides .	enzyme		The exact incidence of MPS VII is unknown, although it is estimated to occur in 1 in 250,000 newborns. It is one of the rarest types of mucopolysaccharidosis.	no specific treatment supportive/symptomatic therapy. Yamada et al. (1998) reported that allogeneic bone marrow transplant in a 12-year-old Japanese girl with MPS VII resulted in improved motor function and activities of daily living, decreased upper respiratory and ear infections, but no improvement in cognitive function.	no treatment	OMIM:253220	PMID: 19375967 ,Scriver's Online Metabolic and Molecular Bases of Inherited Disease (OMMBID): The Mucopolysaccharidoses
Glycogen storage disease 0, muscle/muscle glycogen synthase deficiency	carbohydrate disorder	carbohydrate metabolism	GYS1	GYS1	2997	1	GGNG,GLGNS1	2	2				heart, muscle, nervous system	heart, muscles, nervous system		cardiomyopathy and exercise intolerance associated with complete absence of muscle glycogen.	carbohydrate					OMIM:611556	PMID: 17928598
glycogen storage disease type 0 (GSD0)/liver glycogen synthase deficiency	carbohydrate disorder	carbohydrate metabolism	GYS2	GYS2	2998	1	GGNG,GLGNS1	2	2	autosomal recessive	autosomal recessive		nervous system, liver	nervous system, liver		deficiency of glycogen synthetase in the liver. ketotic hypoglycemia when fasting.	enzyme			protein-rich meals and nighttime feedings of suspensions of uncooked corn starch	diet	OMIM:240600	PMID: 16337419
TRIFUNCTIONAL PROTEIN DEFICIENCY	lipid disorder	lipid metabolism	HADHA	HADHA	3030	1	ACACT1rm,C2M26DCOAHLm,ECOAH12m,ECOAH1m,ECOAH9m,HACD1m,PRPNCOAHYDm,T2M26DCOAHLm, FAOXC14C14OHm, FAOXC18C18OHm, FAOXC16C16OHm, FAOXC161C161OHm, FAOXC181C181OHm, FAOXC182C182OHm, FAOXC182C162m, FAOXC162C142m, FAOXC142C122m, FAOXC14C12m, FAOXC15C13m, FAOXC13C11m, FAOXC16C14m, FAOXC14C12m, FAOXC161C141m, FAOXC141C121m, FAOXC17C15m, FAOXC181C161m, FAOXTC182TC162m, FAOXTC162TC142m, FAOXTC142TC122m, FAOX…	41	44	autosomal recessive	autosomal recessive	clinically destinguished into 2 forms- 1) infancy and 2) early childhood forms. (http://ghr.nlm.nih.gov/condition/long-chain-3-hydroxyacyl-coenzyme-a-dehydrogenase-deficiency)	muscle, liver, eye, nervous system	muscle, liver, eye, peripheral nervous system		in urine-increased levels of 3-Hydroxydicarboxylic acid,3-Hydroxysuberic acid,Dicarboxylic acids .decreased activity of the enzyme in fibroblast.	enzyme		The incidence of LCHAD deficiency is unknown. One estimate, based on a Finnish population, indicates that 1 in 62,000 pregnancies is affected by this disorder. In the United States, the incidence is probably much lower.	medium-chain triglyceride preparation, preparation with a higher ratio of decanoate to octanoate may be most effective.	diet	OMIM:609016	PMID: 19699128
LONG-CHAIN-3-HYDROXYACYL-CoA DEHYDROGENASE DEFICIENCY (LCHAD)	lipid disorder	lipid metabolism	HADHB	HADHB	3032	1	ACACT1rm,C2M26DCOAHLm,ECOAH12m,ECOAH1m,ECOAH9m,HACD1m,PRPNCOAHYDm,T2M26DCOAHLm, FAOXC182C162m, FAOXC162C142m, FAOXC142C122m, FAOXC14C12m, FAOXC15C13m, FAOXC13C11m, FAOXC16C14m, FAOXC14C12m, FAOXC161C141m, FAOXC141C121m, FAOXC17C15m, FAOXC181C161m, FAOXTC182TC162m, FAOXTC162TC142m, FAOXTC142TC122m, FAOXC183C163m, FAOXC163C143m, FAOXC143C123m, FAOXC225C204m, FAOXC204C184m, FAOXC226C205m, FAOXC205C1…	35	35	autosomal recessive	autosomal recessive	Three clinical phenotypes were apparent: 1)severe neonatal presentation with cardiomyopathy, 2)hepatic form with recurrent hypoketotic hypoglycemia, 3)milder, later-onset neuromyopathic phenotype with episodic myoglobinuria. (OMIM:143450)	heart, muscle, respiratory system	heart, muscle, respiratory system		in plasma-decreased activity of 3-Hydroxybutyric acid,increased Long chain acyl carnitines. In urine-3-Hydroxyadipic acid,3-Hydroxysebacic acid ,3-Hydroxysuberic acid ,Dicarboxylic acids,	acylcarnitine		rare (>30 cases), 1:500000 in Sweden autosomal recessive	corticosteroids high-carbohydrate diet L-carnitine low-fat diet medium-chain triglycerides (MCT) riboflavin	diet	OMIM:143450	PMID: 19699128
short chain 3-hydroxy acyl coA dehydrogenase deficiency, Familial hyperinsulinism (FHI)	beta oxidation of fatty acids	lipid metabolism	HADH	HADH	3033	1	FAOXC122C101m, FAOXC101C8m, FAOXC8C6m, FAOXC6C4m, FAOXC4C2m, FAOXC14C12m, FAOXC12C10m, FAOXC10C8m, FAOXC15C13m, FAOXC11C9m, FAOXC9C7m, FAOXC7C5m, FAOXC5C3x, FAOXC121C101m, FAOXC101C8m, FAOXTC122TC101m, FAOXC123C102m, FAOXC102C81m, FAOXC81C61m, FAOXC61C4m	20	18				nervous system, muscle, heart	nervous system, heart, muscle		decreased blood glucose, decreased muscle Short-chain 3-hydroxyacyl-CoA dehydrogenase. In serum- increased creatinine kinase and transaminases. In urine- increased 3-Hydroxybutyric acid, 3-Hydroxydodecanedioic acid , Adipic acid, Dicarboxylic acids, Ketone bodies, Myoglobin , sebacic acid and suberic acid.	enzyme	blood glucose-3.30-5.50 mmol/l, muscle Short-chain 3-hydroxyacyl-CoA dehydrogenase -5.10-8.70 µmol/min/g tissue, In urine- 3-Hydroxybutyric acid (0.10-2.70 mmol/mol creatinine), 3-Hydroxydodecanedioic acid (10.00-100.00 mmol/mol creatinine), myoglobin (0.00-50.00 µg/l), sebacic acid (0.00-2.00 mmol/mol creatinine), suberic acid (0.50-10.90 mmol/mol creatinine). (mic)		diazoxide	medications	OMIM:601609
Histidinemia	amino acid disorders	amino acid metabolism	HAL	HAL	3034	1	HISD	1	1	autosomal recessive	autosomal recessive		nervous system	nervous system		in plasma-increased Histamine . In serum-increased Histidine . In urine-increased Imidazoleacetic acid ,histidine,histamine,Imidazolelactic acid ,Imidazolepyruvic acid ,N-Acetylhistidine ,N-Methylhistamine	amino acid		Estimates of the incidence of histidinemia vary widely, ranging between 1 in 8,600 to 1 in 90,000 people.	low-histidine diet	diet	OMIM:235800	PMID: 20156889
Sandhoff disease	carbohydrate disorder	carbohydrate metabolism	HEXB	HEXB	3074	1	AHEXASE2ly,AHEXASEly,NACHEX10ly,NACHEX11ly,NACHEX12ly,NACHEX13ly,NACHEX14ly,NACHEX15ly,NACHEX16ly,NACHEX17ly,NACHEX18ly,NACHEX19ly,NACHEX1ly,NACHEX20ly,NACHEX21ly,NACHEX22ly,NACHEX23ly,NACHEX24ly,NACHEX25ly,NACHEX26ly,NACHEX27ly,NACHEX2ly,NACHEX3ly,NACHEX4ly,NACHEX5ly,NACHEX6ly,NACHEX7ly,NACHEX8ly,NACHEX9ly,NACHEXA10ly,NACHEXA11ly,NACHEXA12ly ,NACHEXA13ly,NACHEXA14ly,NACHEXA15ly,NACHEXA16ly,NACHE…	51	51	autosomal recessive	autosomal recessive	1)The most common and severe form of Sandhoff disease becomes apparent in infancy. Infants with this disorder typically appear normal until the age of 3 to 6 months, when their development slows and muscles used for movement weaken. 2) As the disease progresses, children with Sandhoff disease experience seizures, vision and hearing loss, intellectual disability, and paralysis. An eye abnormality …	respiratory system, nervous system, muscle, eye	brain,spinal cord,muscles,eye(cherry red spot).	clinically indistinguishable from Tay-Sachs disease .	decreased serum beta-Hexosaminidase activity and Oligosaccharides appear in urine.	enzyme		This condition appears to be more common in the Creole population of northern Argentina; the Metis Indians in Saskatchewan, Canada; and people from Lebanon.	no specific treatment supportive/symptomatic therapy	no treatment	OMIM.268800	Scriver's Online Metabolic and Molecular Bases of Inherited Disease (OMMBID): The GM2 Gangliosidoses,PMID: 18930675
Alkaptonuria	amino acid disorders	amino acid metabolism	HGD	HGD	3081	1	HGNTOR	1	1	autosomal recessive	autosomal recessive	No correlation is observed between the type of HGD mutation and amount of HGA excreted or severity of the disease.	nervous system, skeletal system, heart, kidney, prostrate	spine,large joints,heart,kidney,prostrate		liver cells show decreased homogentisic acid oxidase activity. In urine-increased homogentisic acid and Fecl3 test-green	enzyme	in urine-Homogentisic acid-0.00-2.00 mmol/mol creatinine(metabolic information centre)	1 in 250,000 to 1 million people worldwide	low-protein diet no specific treatment vitamin C (ascorbate)	diet	OMIM:203500	http://www.ncbi.nlm.nih.gov/bookshelf/br.fcgi?book=gene&part=alkap
nonspherocytic hemolytic anemia	carbohydrate disorder	carbohydrate metabolism	HK1	HK1	3098	1	HEX1	1	4	autosomal recessive	autosomal recessive		RBC, platelets	RBC and platelets.								OMIM:235700	PMID: 10916679
Holocarboxylase synthetase deficiency	biotin metabolism	vitamin metabolism	HLCS	HLCS	3141	1	BACCL,BACCLm,BTNPL,BTNPLm	4	4	autosomal recessive	autosomal recessive					in urine-increased 3-hydroxyisovaleric acid,3-OHC5,3-hydroxy propionic acid,3-methylcrotonylglycine etc.	fatty acid		1 in 87,000 people.	biotin	medications	OMIM:253270	PMID: 12633764
Acute intermittent porphyria	heme biosythesis disorder	heme biosythesis disorder	HMBS	HMBS	3145	1	HMBS	1	1	autosomal dominant	autosomal dominant	Genotype-phenotype correlations are not evident in HMBS deficiency [Elder 1998], in part because of (1) HMBS enzyme activity in heterozygotes that is adequate for normal heme synthesis and (2) the effect of environmental factors on clinical expression of the disease. Unidentified modifying genes may also be important. higher prevalence was found in individuals with p.Trp198X or p.Arg173Trp mutati…	digestive system, nervous system	gastro-intestinal system, nervous system		fecal Porphyrins increases. In urine-increased levels of Delta-aminolevulinic acid ,Porphobilinogen and Porphyrins .	porphyrin		in Sweden is about 1 in 10,000. 1 in 50,000, probably in all ethnic groups (Tschudy et al., 1975), including blacks (Kreimer-Birnbaum et al., 1980).	avoidance of specific drugs glucose infusion (acute) gonadotropin-releasing hormone analog hematin liver transplantation luteinizing hormone-releasing hormone (LHRH) tibolone	TP	OMIM:176000	http://www.ncbi.nlm.nih.gov/bookshelf/br.fcgi?book=gene&part=aip
HMG-CoA lyase deficiency	organic acid disorders	lipid metabolism	HMGCL	HMGCL	3155	1	HMGLm	1	2	autosomal recessive	autosomal recessive		liver, pancreas	liver,pancrease	Robinson et al. (1980)-Liver biopsy showed diffuse accumulation of lipid droplets in swollen hepatocytes, Wilson et al. (1984) reported a 5-year-old child with a history of recurrent hypoglycemia who presented with a Reye-like syndrome and acute pancreatitis.-OMIM:246450	3-methylglutaconic acid increased,C6DC increased in blood,in urine-increased 3-methylglutaconic acid,adipic acid,3-methyl glutaryl acid etc.	acylcarnitine		rare condition. it has been reported in fewer than 100 individuals worldwide.	avoidance of fasting high-carbohydrate diet L-carnitine leucine-restricted diet low-fat diet low-protein diet	diet	OMIM:246450	PMID: 17692550
HMG-CoA synthase-2 deficiency	Cholesterol Metabolism	lipid metabolism	HMGCS2	HMGCS2	3158	1	HMGCOASim	1	1				nervous system, liver	nervous system, liver		low blood glucose, elevated transaminases and lactate dehydrogenase,During a monitored fasting test, massive elevation of plasma free fatty acids without concomitant elevation of total plasma ketones was observed.	fatty acid			supplementary carnitine, caloric drink at around midnight.	medications	OMIM:605911	PMID: 16601895
Asthma	Histidine Metabolism	amino acid metabolism	HNMT	HNMT	3176	1	SAMHISTA	1	1	autosomal-dominant	autosomal dominant		respiratory system	lungs								OMIM:600807	PMID: 10803682, PMID: 3812414
Tyrosinemia type III	amino acid disorders	amino acid metabolism	HPD	HPD	3242	1	PPOR, 34HPPOR	2	2	autosomal recessive	autosomal recessive		nervous system	brain	Giardini et al. (1983) described tyrosinemia without liver dysfunction due apparently to deficiency of 4-hydroxyphenylpyruvate dioxygenase (4HPPD).	in plasma-increased tyrosine. In urine-elevated 4-OH-phenyllactic acid,4-OHphenylacetic acid,4-Ohphenylpyruvic acid etc.	amino acid	plasma tyr-55.00-147.00 µmol/l(metabolic information centre)	Type III tyrosinemia is very rare; only a few cases have been reported.	tyrosine-restricted diet vitamin C (ascorbate)	diet	OMIM:276710	PMID: 11916315
Lesch-Nyhan syndrome	nucleotide metabolism	nucleotide metabolism	HPRT1	HPRT1	3251	1	HXPRT, GUAPRT	2	2	X-linked recessive	X-linked	Observed genotype-phenotype correlations are based on the amount of residual HPRT enzyme activity [Jinnah et al 2000, Jinnah et al 2004]. Mutations that completely disrupt HPRT enzyme function are associated with Lesch-Nyhan syndrome, whereas mutations that allow some residual HPRT enzyme function may be associated with the less severe phenotypes. Certain missense mutations that have been identif…	kidney, urinary bladder, skeletal system	kidney, bladder, joints		decreased activity of Hypoxanthin guanine phosphoribosyl transferase (HPRT) in fibroblast.in serum-decreased folate and increased uric acid. Increased amounts of uric acid in urine.	enzyme		The prevalence of Lesch-Nyhan syndrome is approximately 1 in 380,000 individuals. This condition occurs with a similar frequency in all populations.	allopurinol	medications	OMIM:300322	http://www.ncbi.nlm.nih.gov/bookshelf/br.fcgi?book=gene&part=lns
D-bifunctional protein deficiency (DBPD)	fatty acid beta oxidation	lipid metabolism	HSD17B4	HSD17B4	3295	1	FAOXC2452256x, FAOXC246226x, FAOXC260240x, PEROXx, FAOXC16080x, FAOXC180x, FAOXC183806x, FAOXC18480x, FAOXC200180x, FAOXC2051843x, FAOXC2242046x, FAOXC2251836x, FAOXC2252053x, FAOXC226205x, FAOXC240200x, FAOXC241181x, FAOXC2442246x, FAOXC2452253x	18	60	autosomal recessive	autosomal recessive		nervous system, heart, liver	nervous system, heart, liver		in plasma- increased C26:0, Pipecolic acid, Trihydroxycoprostanic acid. In urine- increased Pipecolic acid	fatty acid					OMIM:261515
Mucopolysaccharidosis type II/Hunter syndrome	carbohydrate disorder	carbohydrate metabolism	IDS	IDS	3423	1	S2TASE1ly,S2TASE2ly,S2TASE3ly	3	3	X-linked recessive	X-linked	There are two types of MPS II, called the severe and mild types.While both types affect many different organs and tissues, people with severe MPS II also experience a decline in intellectual function and a more rapid disease progression. Individuals with the severe form begin to lose basic functional skills (developmentally regress) between the ages of 6 and 8. The life expectancy of these indivi…	nervous system, liver, spleen, skin, eye, heart, respiratory system	brain,liver,spleen,skin,eye(retina),heart,respiratory system.	McKusick (1972) noted a lack of corneal clouding in the X-linked form of MPS as opposed to the autosomal forms (see MPS I-H, 607014).	decreased activity of Iduronosulfate-2-sulfatase in fibroblast.in urine-increased excretion of Dermatan sulfate ,Heparan sulfate and Mucopolysaccharides .	enzyme		1 in 100,000 to 1 in 170,000 males.	bone marrow transplantation hemopoietic stem cell transplantation	TP	OMIM:309900	http://www.ncbi.nlm.nih.gov/bookshelf/br.fcgi?book=gene&part=hunter
Fructosuria(essential Fructosuria)	carbohydrate disorder	carbohydrate metabolism	KHK	KHK	3795	1	KHK	1	3	autosomal recessive	autosomal recessive		spleen, liver	spleen, liver		decreased activity of Fructokinase in liver. In urine-increased excretion of Fructose and other reducing substances.	enzyme		1:130000	no treatment indicated/recommended	no treatment	OMIM:229800	PMID: 6268573
fish-eye disease/ LCAT deficiency	lipid disorder	lipid metabolism	LCAT	LCAT	3931	1	LCAT1e	1	1				eye, heart	eye, heart		in serum-low levels of HDL cholesterol where as elevated triglycerides.	cholesterol					OMIM:136120	PubMed: 4061122, PMID: 3141686
Congenital lactase deficiency/congenital alactasia	carbohydrate disorder	carbohydrate metabolism	LCT	LCT	3938	1	LACZe	1	1	autosomal recessive	autosomal recessive		digestive system	intestine		a decreased blood ph. Increased aminoacids and lactose in urine	amino acid	blood lactate-0.90-1.80 mmol/, blood pyruvate- 27.00-160.00 µmol/l (metabolic information centre)	1 in 60,000 newborns in Finland.Approximately 65 percent of the human population has a reduced ability to digest lactose after infancy. Lactose intolerance is also very common in people of West African, Arab, Jewish, Greek, and Italian descent.	change to a milk-free diet leads to rapid recovery	diet	OMIM:223000	PMID: 20629478
Exertional myoglobinuria due to deficiency of LDH-A/Glycogen storage disease XI	carbohydrate disorder	carbohydrate metabolism	LDHA	LDHA	3939	1	LDH_L,LDH_Lm	2	6				kidney, muscle, skin	kidney, muscle,skin								OMIM:612933	http://emedicine.medscape.com/article/982711-overview
hepatic lipase deficiency	lipid disorder	lipid metabolism	LIPC	LIPC	3990	1	LPS2e,LPS3e,LPSe	3	3				heart, skin	heart, skin		abnormal triglyceride,rich low and high density lipoproteins as well as beta-migrating very low density lipoproteins in blood.	lipid					OMIM:151670	PMID: 2297346
leukotriene C4 synthase deficiency (LTC4 synthase deficiency)	prostaglandin metabolism	lipid metabolism	LTC4S	LTC4S	4056	1	LTC4Sr	1	1				nervous system, muscle	nervous system, muscles		decreased levels of Cysteinyl leukotrienes (LTC4, LTD4, LTE4) in plasma,urine and apinal fluid.	lipid					OMIM:246530	PMID: 9820300
Alpha-mannosidosis	carbohydrate disorder	carbohydrate metabolism	MAN2B1	MAN2B1	4125	1	A_MANASEly	1	1	autosomal recessive	autosomal recessive	Type 1. Mild form clinically recognized after age ten years, without skeletal abnormalities and very slow progression Type 2. Moderate form, clinically recognized before age ten years, with skeletal abnormalities and slow progression with development of ataxia at age 20-30 years Type 3. Severe form, immediately recognized, with skeletal abnormalities and obvious progression leading to an early de…	skeletal system, nervous system, muscle, liver, spleen, eye	skeletal system-bones of knees,legs,vertebrae,skull, joints. Nervous system,muscles,liver,spleen,eye.		decreased alpha-mannosidase activity in serum. In urine-increased oligosaccharides.	enzyme		1 in 500,000 people worldwide.	no specific treatment	no treatment	OMIM:248500	http://www.ncbi.nlm.nih.gov/bookshelf/br.fcgi?book=gene&part=a-mannosidosis
Beta-mannosidosis	carbohydrate disorder/lysosomal disorder	carbohydrate metabolism	MANBA	MANBA	4126	1	B_MANNASEly	1	1	autosomal recessive	autosomal recessive		nervous system, muscle, skin	nervous system,muscles,skin		serum dolichol increases and increase oligosaccharides in urine.	carbohydrate		Approximately 20 affected individuals have been reported worldwide.			OMIM:248510	PMID: 19728872
Brunner syndrome (BRUNS)	hormone metabolism	hormone metabolism	MAOA	MAOA	4128	1	3HXKYNOXDA,3MOXTYROX,41R2A1H12BOOX,42A12BOOX,5HOXINOXDA,5HXKYNOXDA,APRTO2,MAOLNOR,PEAMNO,TRYPTAOX,TYROXDAc,	12	12	X-linked	X-linked		nervous system	nervous system								OMIM:300615	PMID: 8862875
Carbohydrate-deficient glycoprotein syndrome, type Ib	carbohydrate disorder	carbohydrate metabolism	MPI	MPI	4351	1	MAN6PI	1	1	autosomal recessive	autosomal recessive		nervous system, liver	central nervous system, liver		severe hypoproteinemia, anemia, and decreased antithrombin III (AT3; 107300). Isoelectric focusing of serum transferrin showed a pattern consistent with CDG type I.	antithrombin			Daily oral mannose administration	medications	OMIM:602579	http://www.ncbi.nlm.nih.gov/pmc/articles/PMC508719/pdf/1011414.pdf
myeloperoxidase deficiency	immune disorder	immune disorder	MPO	MPO	4353	1	PRDXl	1	1	autosomal recessive	autosomal recessive								in the U.S. is on the order of 1 in 2,000			OMIM:254600
mevalonic aciduria	Cholesterol Metabolism	lipid metabolism	MVK	MVK	4598	1	MEVK1x	1	1	autosomal recessive	autosomal recessive		nervous system, liver, spleen, muscle	nervous system, liver, spleen, muscles		decreased activity of Mevalonate kinase in fibroblasts, high levels of Mevalonic acid in urine and plasma,Mevalonolactone also found in high levels in urine. In serum-decreased cholesterol and increased Creatinine kinase.	enzyme		rare (30 cases have been reported)	anakinra cholesterol coenzyme Q10 lipoic acid vitamin C (ascorbate)	medications	OMIM:251170	PMCID: PMC1475558
Schindler disease	carbohydrate disorder/lysosomal storage disorder	carbohydrate metabolism	NAGA	NAGA	4668	1	NAGA2ly,NAGAly	2	2	autosomal recessive	autosomal recessive	1) Schindler disease type I, also called the infantile type, is the most severe form. Babies with Schindler disease type I appear healthy at birth, but by the age of 8 to 15 months they stop developing new skills and begin losing skills they had already acquired (developmental regression).2)Schindler disease type II, also called Kanzaki disease, is a milder form of the disorder that usually appea…	respiratory system, heart, liver	central nervous system. In addition in type 3 heart and liver	angiokeratoma is the characteristic feature of type II.	in plasma and fibroblast decreased activity of alpha-N-Acetylgalactosaminidase . In urine-increased excretion of Glycopeptides, various glycoconjugates and Oligosaccharides .	enzyme	alpha-N-Acetylgalactosaminidase -21.70-62.90 nmol/h/mg protein(metabolic information centre)	Schindler disease is very rare. Only a few individuals with each type of the disorder have been identified.	no specific treatment	no treatment	glycolipids are broken down by the enzyme.OMIM:609241 and OMIM:609242	Scriver's Online Metabolic and Molecular Bases of Inherited Disease (OMMBID): α-N-Acetylgalactosaminidase Deficiency: Schindler Disease
mucopolysaccharidosis type IIIB/Sanfilippo syndrome B	lysosomal disorder	carbohydrate metabolism	NAGLU	NAGLU	4669	1	GLCNACASE1ly,GLCNACASE2ly,GLCNACASE3ly,GLCNACASE4ly,GLCNACASE5ly	5	5	autosomal recessive	autosomal recessive	Types A, B, C, D	nervous system, liver, spleen, skeletal system	brain,liver,spleen, joints		decreased activity of alpha-N-acetylglucosaminidase,	enzyme			bone marrow transplantation	TP	OMIM:252920
Sialidosis	carbohydrate disorder	carbohydrate metabolism	NEU1	NEU1	4758	1	GALASE10ly,GALASE11ly,GALASE12ly,GALASE13ly,GALASE14ly,GALASE15ly,GALASE16ly ,GALASE17ly ,GALASE18ly,GALASE19ly,GALASE1ly,GALASE20ly,GALASE3ly,GALASE4ly,GALASE5ly,GALASE6ly,GALASE7ly,GALASE8ly,GALASE9ly,GLB1,LACZly,S6TASE10ly,S6TASE22ly,S6TASE25ly,S6TASE4ly,S6TASE5ly,S6TASE6ly,S6TASE7ly,S6TASE8ly,S6TASE9ly,SIAASE2ly,SIAASE3ly,SIAASE4ly,SIAASEly	34	34	autosomal recessive	autosomal recessive	1)Sialidosis type I, also referred to as cherry-red spot myoclonus syndrome, is the less severe form of this condition. 2)Sialidosis type II, the more severe type of the disorder, is further divided into congenital, infantile, and juvenile forms. The features of congenital sialidosis type II can develop before birth.Infantile sialidosis type II shares some features with the congenital form, altho…	nervous system, eye, liver, spleen	nervous system,eye. In type II additionally liver,spleen.		decreased activity of alpha-Neuraminidase in fibroblast. In urine increased amounts of Sialyloligosaccharides	enzyme		The overall prevalence of sialidosis is unknown. Sialidosis type I appears to be more common in people with Italian ancestry.	symptomatic therapy	no treatment	OMIM:256550	PMID: 14517945
Homocysteine plasma level	NAD Metabolism	xenobiotic metabolism	NNMT	NNMT	4837	1	NNMT	1	1													OMIM:600008. Homocysteine (Hcy) plasma level is an independent risk marker for venous thrombosis, myocardial infarction, stroke, congestive heart failure, osteoporotic fractures, and Alzheimer disease (AD; 104300)	PMID: 15849667
Gyrate atrophy of the choroid and retina	amino acid disorders	amino acid metabolism	OAT	OAT	4942	1	ORNTArm	1	1	autosomal recessive	autosomal recessive		muscle, eye	muscle, eyes		decreased activity of Ornithine-delta-aminotransferase in fibroblast. In plasma increased ornithine and low levels of Glutamic acid , Glutamine , Lysine. Increased ornithine in CSF. In urine- increased levels of 2-Aminopiperid-2-one ,Arginine ,Lysine and ornithine.	enzyme	in plasam, Glutamic acid =10.00-133.00 µmol/l, glutamine0246.00-1182.00 µmol/l, lysine048.00-284.00 µmol/l, ornithine027.00-103.00 µmol/l. In CSF, ornithine=1.90-6.90 µmol/l. In urine, arginine03.00-11.00 mmol/mol creatinine, lysine07.00-29.00 mmol/mol creatinine, ornithine=2.00-8.00 mmol/mol creatinine.	150 cases	amino acid mixture low-arginine diet low-protein diet lysine Vitamin B6 (pyridoxine)	diet	OMIM:258870	http://ghr.nlm.nih.gov/condition/gyrate-atrophy-of-the-choroid-and-retina
Alpha-ketoglutarate dehydrogenase deficiency	carbohydrate disorder	carbohydrate metabolism	OGDH	OGDH	4967	1	AKGDm	1	2				nervous system, muscle	nervous system, muscles		Low molar ratios of ketone bodies in plasma of neonates with congenital lactic acidosis- Bonnefont et al. (1992)	organic acid					OMIM:203740	PMID: 8295396
succinyl-CoA:3-oxoacid CoA transferase deficiency	ketone body catabolism	lipid metabolism	OXCT1	OXCT1	5019	1	OCOAT1m	1	1	autosomal recessive	autosomal recessive		nervous system, respiratory system, kidney	nervous system, respiratory system, kidney		in blood and urine-increased ketone bodies, in fibroblast- decreased 3-Ketoacid CoA transferase, in plasma- increased 3-Hydroxybutyrate + Acetoacetate.	enzyme	in fibroblast- 3-Ketoacid CoA transferase (9.80-13.00 nmol/min/mg protein), in plasma- 3-Hydroxybutyrate + Acetoacetate (0.00-0.20 mmol/l) (mic)		glucose infusion (acute) low-protein diet sodium bicarbonate	diet	OMIM:245050
phenylketonuria	amino acid disorders	amino acid metabolism	PAH	PAH	5053	1	PHETHPTOX2	1	1	autosomal recessive	autosomal recessive	Phenylketonuria (PKU),Non-PKU hyperphenylalaninemia (non-PKU HPA) and Variant PKU	nervous system	brain(OMIM:261600)	Numerous studies indicate that individuals with PKU have a high incidence of osteopenia (as measured by DEXA) [Zeman et al 1999, Pérez-Dueñas et al 2002, Modan-Moses et al 2007]. -http://www.ncbi.nlm.nih.gov/bookshelf/br.fcgi?book=gene&part=pku	plasma phenylalanine and phe/tyr increased;urine-increased excretion of 2-hydroxyphenylacetic acid,phenyl lactic acid and phenyl pyruvic acid .Fecl3 test-green	amino acid	plasma Phenylalanine-38.00-137.00 µmol/l,Phenylalanine/Tyrosine-0.20-1.21(metabolic information centre),Phenylalanine in spinal fluid-20.00 µmol/l(metabolic information centre)	in united states 1 in 10,000 to 15,000 newborns	amino acid mixture BH4 (tetrabiopterin) phenylalanine-restricted diet vitamin B12 (hydroxycobalamin)	diet	the phenotypes mentioned is a simple classification on the basis of clnical diagnosis.PAH deficiency is a 'complex' disorder at the cognitive and metabolic levels [Scriver & Waters 1999]. It is difficult to assess clinical phenotypes.	fundamentals of biochemistry,upgrade edition by donald voet,judith g.voet and charlotte w. pratt,page636-640,PMID:16770930
Pyruvate carboxylase deficiency	carbohydrate disorder	carbohydrate metabolism	PC	PC	5091	1	PCm	1	1	autosomal recessive	autosomal recessive	1)Type A (infantile form)- infantile onset. 2)Type B (severe neonatal form)-Although the majority of affected infants die within the first three months of life [García-Cazorla et al 2006], two are alive at ages nine and 20 years, likely due to mosaicism [Wang et al 2008] .3)Type C (intermittent/benign form).4)Mosaicism was found in five individuals-Wang et al 2008. 5)Homozygous mutations.	muscle, respirstory system, liver, nervous system	type A-muscles,respirstory system. Type B affects liver,nervous system,muscles. Type C-nervous system.	Oizumi et al. (1983) reported a patient with PC deficiency associated with renal tubular acidosis and cystinuria.	in blood-increased 3-Hydroxybutyrate/Acetoacetate, fasting state 15 h,ammonia,lactate,pyruvate/lactate ratio,decreased glucose. In plasma-increased alanine,citrulline,proline and lysine. In urine-increased excretion of 2-Oxoglutaric acid ,fumaric acid,ketone boddies and succinate.	amino acid		1 in 250,000 births worldwide. This disorder appears to be much more common in some Algonkian Indian tribes in eastern Canada.	aspartate citrate high-carbohydrate diet sodium bicarbonate	diet	OMIM:266150	http://www.ncbi.nlm.nih.gov/bookshelf/br.fcgi?book=gene&part=pdc
cytosolic phosphoenolpyruvate carboxykinase deficiency	carbohydrate disorder	carbohydrate metabolism	PCK1	PCK1	5105	1	PEPCK	1	1	autosomal recessive	autosomal recessive		liver, kidney, muscle, nervous system	liver,kidney, muscles,nervous system					<10 cases have been reported in literature.			OMIM:261680	Vidnes, J., Sovik, O. Gluconeogenesis in infancy and childhood. III. Deficiency of the extramitochondrial form of hepatic phosphoenolpyruvate carboxykinase in a case of persistent neonatal hypoglycaemia. Acta Paediat. Scand. 65: 301-312, 1976, http://www.uniprot.org/uniprot/P35558
mitochondrial phosphoenolpyruvate carboxykinase deficiency	carbohydrate disorder	carbohydrate metabolism	PCK2	PCK2	5106	1	PEPCKm	1	1	autosomal recessive	autosomal recessive		liver, kidney	liver, kidney		decreased activity of Phosphoenolpyruvate carboxykinase in fibroblast. Increased blood lactate and pyruvate. Serum cholesterol and glucose decreases where as triglycerides elevated.	enzyme			cornstarch, uncooked glucose infusion (acute) sodium bicarbonate	diet	OMIM:261650	Fiser, R. H., Jr., Melsher, H. L., Fisher, D. A. Hepatic phosphoenolpyruvate carboxykinase (PEPCK) deficiency: a new cause of hypoglycemia in childhood. Pediat. Res. 8: 432-only, 1974.
Glycogen storage disease VII/Tarui disease	carbohydrate disorder	carbohydrate metabolism	PFKM	PFKM	5213	1	PFK	1	1	autosomal recessive	autosomal recessive		respiratory system, muscle, kidney	lung, muscles, kidney		decreased activity of Muscle phosphofructokinase 1 , increased myoglobin in urine, in serum increased levels of Bilirubin , Creatinine kinase and Uric acid	enzyme	serum bilirubin=3.40-17.00 µmol/l, serum Creatinine kinase =40.00-400.00 U/l and serum uric acid=0.60-5.50 mg/dl (hmdb)	1:1000.000			OMIM:232800
Glycogen storage disease X	carbohydrate disorder	carbohydrate metabolism	PGAM2	PGAM2	5224	1	DPGase,PGM	2	3	autosomal recessive	autosomal recessive		muscle, kidney	muscles, kidney		decreased Muscle phosphoglycerate mutase activity	enzyme					OMIM:261670	PMID: 8447317
Glycogen storage disease XIV	carbohydrate disorder	carbohydrate metabolism	PGM1	PGM1	5236	1	PGMT	1	2				muscle	muscles		serum creatine kinase and ammonia were increased after strenuous exercise. Muscle biopsy showed abnormal subsarcolemmal and sarcoplasmic accumulations of normally structured, free glycogen.reduced PGM1 activity	enzyme					OMIM:612934	PMID: 19625727
classic refsum disease	fatty acid disorders	lipid metabolism	PHYH	PHYH	5264	1	PHYHx	1	1	autosomal recessive	autosomal recessive	3 forms- 1)adult Refsum disease-1, occurs due to mutation in the gene encoding phytanoyl-CoA hydroxylase (PHYH, or PAHX) on chromosome 10. 2)adult Refsum disease-2, occurs due to mutation in gene encoding peroxin-7 (PEX7; 601757) on chromosome 6q. 3)infantile form of Refsum disease can be caused by mutation in the PEX1 , the PEX2 , or the PEX26 genes.	eye, nervous system	eye,brain	Skjeldal et al. (1987)- reported anosmia and progressive hearing loss.Skin changes, cardiac abnormalities, and skeletal manifestations were less common.phytanic acid oxidase activity in fibroblasts was very low.Leys et al. (1989) described 2 brothers who presented in their twenties with severe heart failure as the predominant clinical manifestation of Refsum disease. Van den Brink et al. (2003) r…	increased phytanic acid but decreased pristanic acid in plasma	fatty acid	Plasma Phytanic Acid-<10 µmol/L, Plasma Pristanic Acid-<3.0 µmol/L(gene reviews)	one in 106 in the United Kingdom	phytanic acid restricted diet therapeutic apheresis	diet	no clear phenotype-genotype correlations have been identified as yet. Phenotypic variation may be related to the dietary intake of phytanic acid, which is thought to be the toxic compound.	Biochemica et Biophysica Acta 1801 (2010) 272-280
pyruvate kinase deficiency	blood disorders	blood disorders	PKLR	PKLR	5313	1	PYK	1	1	autosomal recessive	autosomal recessive		liver, spleen, gall bladder, RBC	liver, spleen, gall-bladder, red blooc cell		decreased Pyruvate kinase in erythrocytes.	enzyme			immunization splenectomy transfusions	medications	OMIM:609712 and OMIM:266200
Congenital disorder of glycosylation type Ia	carbohydrate disorder	carbohydrate metabolism	PMM2	PMM2	5373	1	PMANM	1	1	autosomal recessive	autosomal recessive	1)C-terminal mutations, including p.His218Leu, p.Thr237Met, and p.Cys241Ser, may be associated with a milder phenotype [Matthijs et al 1999, Tayebi et al 2002]. 2)Individuals with the [p.Arg141His]+[p.Phe119Leu] genotype probably represent the severe end of the clinical spectrum of CDG-1a. 3)A severe phenotype presenting with a high mortality rate was observed with the [p.Asp188Gly]+[p.Arg141His]…	nervous system, muscle	nervous system (both central and peripheral), muscles		Phosphomannomutase activity decreases in fibroblast.in serum-alpha1-decreased Antitrypsine, increased Asialotransferrin, increased Carbohydrate-deficient transferrins ,decreased Cholesterol, increased Disialotransferrin ,decreased Haptoglobin , decreased Tetrasialotransferrin , normal/decreased Thyroxine binding globuline (TBG) , increased Transaminases , normal/decreased Transferrin	enzyme		More than 800 individuals with CDG-Ia have been identified worldwide.	ketogenic diet mannose no specific treatment pericardectomy	no treatment	OMIM:212065	http://www.ncbi.nlm.nih.gov/bookshelf/br.fcgi?book=gene&part=cdg-1a
Galactosialidosis	lysosomal disorder	carbohydrate metabolism	CTSA	CTSA	5476	1	GALASE10ly,GALASE11ly,GALASE12ly,GALASE13ly,GALASE14ly,GALASE15ly,GALASE16ly ,GALASE17ly ,GALASE18ly,GALASE19ly,GALASE1ly,GALASE20ly,GALASE3ly,GALASE4ly,GALASE5ly,GALASE6ly,GALASE7ly,GALASE8ly,GALASE9ly,GLB1,LACZly,S6TASE10ly,S6TASE22ly,S6TASE25ly,S6TASE4ly,S6TASE5ly,S6TASE6ly,S6TASE7ly,S6TASE8ly,S6TASE9ly,SIAASE2ly,SIAASE3ly,SIAASE4ly,SIAASEly	34	34	autosomal recessive	autosomal recessive	1)early infantile form- Infants with this form usually are diagnosed between birth and 3 months; they typically live into late infancy. 2)late infantile form-. Children with this condition typically develop symptoms within the first year of life. 3)The juvenile/adult form- The age at which symptoms begin to develop varies widely among affected individuals, but the average age is 16. This form is …	liver, spleen, skeletal system, heart, eye, kidney, muscle, nervous system	liver, spleen, bone, heart, eye, kidney, muscles and nervous system		in leucocytes and fibroblast-decreased activity of beta-Galactosidase and Neuraminidase. Increased activity of Chitotriosidase in plasma. In urine-Sialyloligosaccharides ,protein and oligosaccharides are present.	enzyme		The prevalence of galactosialidosis is unknown; more than 100 cases have been reported. Approximately 60 percent of people with galactosialidosis have the juvenile/adult form. Most people with this type of the condition are of Japanese descent.			OMIM:256540	OMIM:256540 PMID: 3080874
Variegate porphyria	heme biosythesis disorder	heme biosythesis disorder	PPOX	PPOX	5498	1	PPPGOm	1	1	autosomal dominant	autosomal dominant	on und zu Fraunberg et al. (2002) investigated clinical and biochemical characteristics and genotype-phenotype correlations for 3 common PPOX mutations in Finnish patients with VP identified during a period of 35 years. Of the 103 patients studied, 52% experienced clinical symptoms: 40% had photosensitivity, 27% had acute attacks, and 14% had both manifestations. The proportion of patients with a…	skin, nervous system, liver	skin, peripheral nervous system, liver		increased levels of porphyrins in plasma,feces and urine. Low serum sodium. Increased amounts of Delta-aminolevulinic acid and Porphobilinogen in urine.	porphyrin		Dean (1972) estimated that about 8,000 persons in South Africa were suffering from porphyria inherited from either Gerrit Jansz, a Dutch settler in the Cape, or his wife, Ariaantje Jacobs.in Finland (Mustajoki, 1980), where prevalence was estimated to be 1.3 per 100,000. 3 families in Sweden were also recorded.	avoidance of precipitating factors avoidance of specific drugs dextrose hematin heme analogs, synthetic	medications	OMIM:176200	http://ghr.nlm.nih.gov/condition/porphyria
Hyperprolinemia type I	amino acid disorders	amino acid metabolism	PRODH	PRODH	5625	1	PRO1xm,PROD2m	2	2	autosomal recessive	autosomal recessive	There are two inherited forms of hyperprolinemia, called type I and type II.People with hyperprolinemia type I often do not show any symptoms, although they have proline levels in their blood between 3 and 10 times the normal level.	nervous system	nervous system		decreased Proline oxidase activity in liver. Increased Proline in plasma. In urine-elevated Glycine,Hydroxyproline and proline.	enzyme		1:20000	anticonvulsants no treatment indicated/recommended	no treatment	OMIM:239500	PMID: 18806117, http://ghr.nlm.nih.gov/condition/hyperprolinemia
Phosphoribosylpyrophosphate synthetase superactivity (PRS superactivity)	nucleotide metabolism	nucleotide metabolism	PRPS1	PRPS1	5631	1	PRPPS	1	1	X-linked	X-linked	1)PRS superactivity-infantile and juvenile onset. 2)CMTX5-early onset and 3)Arts syndrome-congenital disorder.	skeletal system, kidney, urinary bladder, nervous system, muscle	joints, kidney, bladder, nervous system, muscles.		increased uric acid in serum and urine.	NPN		Approximately 30 families with the condition have been reported. More than two thirds of these families are affected by the milder form of the disease.	allopurinol high fluid intake low-purine diet potassium citrate sodium bicarbonate	diet	OMIM:300661	http://www.ncbi.nlm.nih.gov/bookshelf/br.fcgi?book=gene&part=prs, http://ghr.nlm.nih.gov/condition/phosphoribosylpyrophosphate-synthetase-superactivity
essential hypertension	prostaglandin metabolism	lipid metabolism	PTGIS	PTGIS	5740	1	PGISr	1	1				heart	heart								OMIM:145500	PMID: 20357747
Zellweger syndrome	peroxisome biogenesis disorder	lipid metabolism	ABCD3	ABCD3	5825	1	SCP21cx, PRISTCOAtcx	2	2	autosomal recessive	autosomal recessive		nervous system, liver, heart, eye, skeletal system, kidney	nervous system, liver, heart, eye, skeletal system, kidney		in fibroblast- increased C26:0, C26:0/C22:0, Plasmalogens, biosynthesis, decreased Dihydroxyacetone-phosphate acyltransferase (DHAPAT), Phytanic acid oxidation, in plasma- increased Bile acid intermediates, C24:0/C22:0, C26:0, C26:0/C22:0 , C26:1, Phytanic acid, Pipecolic acid. In platelest decreased Dihydroxyacetone-phosphate acyltransferase. In serum- increased iron, transaminases and very long…	fatty acid	in fibroblast- C26:0 (0.05-0.21 µg/mg), C26:0/C22:0 (0.02-0.13), Dihydroxyacetone-phosphate acyltransferase (1.60-3.40 nmol/2h/mg protein), Phytanic acid oxidation (5.30-18.80 % oxidized), Plasmalogen, biosynthesis (0.40-0.80 3H/14C). In plasma- C24:0/C22:0 (0.50-0.90), C26:0 (0.10-0.60 µg/ml), C26:0/C22:0 (0.01-0.02), C26:1 (0.02-0.51 µg/ml), phytanic acid (0.00-3.10 µg/ml), Pipecolic acid (0.80…	1 in 50,000 individuals	no specific treatment	no treatment
glycogen storage disease type 6/Hers disease	carbohydrate disorder	carbohydrate metabolism	PYGL	PYGL	5836	1	GLPASE1,GLPASE2	2	2	autosomal recessive	autosomal recessive	The clinical phenotype varies from mild undetected hypoglycemia to severe recurrent hypoglycemia with hepatomegaly. No clear genotype-phenotype correlation exists.	liver	liver		blood Lactate, fasting state 15 h increases, Liver phosphorylase and both muscle and liver Phosphorylase kinase activity decreases. In serum- cholesterol,glucose and transaminases increases. In urine- ketone bodies.	enzyme		1:1000.000	frequent feeding maltodextrin	medications	OMIM:	http://www.ncbi.nlm.nih.gov/bookshelf/br.fcgi?book=gene&part=gsd6
Glycogen storage disease type V/McArdle disease	carbohydrate disorder	carbohydrate metabolism	PYGM	PYGM	5837	1	GLPASE2,GLPASE1	2	2	autosomal recessive	autosomal recessive	One study showed that an angiotensin converter enzyme (ACE) insertion/deletion (I/D) polymorphism, involving the insertion (allele I) or deletion (allele D) situated approximately 250 bp into intron 16 of the ACE gene, could play a significant role as a phenotype modulator in individuals with GSDV [Martinuzzi et al 2003]. The ACE I allele has been associated with a higher functional capacity in a…	muscle	muscles	McArdle disease is a relatively benign disorder, except for possible renal failure as a complication of myoglobinuria (Chen, 2001).	increased creatinine kinase in serum and ,myoglobin in urine.	enzyme	serum CK-40.00-400.00 U/l, urine myoglobin-0.00-50.00 µg/l-metabolic information centre	In the Dallas-Fort Worth area of Texas, where the prevalence of GSDV has been studied, the condition is estimated to affect 1 in 100,000 individuals.	avoidance of excessive exercise high-protein diet	diet	OMIM:232600	http://www.ncbi.nlm.nih.gov/bookshelf/br.fcgi?book=gene&part=gsd5
Zellweger syndrome and Leukoencephalopathy with dystonia and motor neuropathy	lipid disorder	lipid metabolism	SCP2	SCP2	6342	1	SCP21x,SCP22x,SCP2x,SCP3x,SCPx	5	5				nervous system	nervous system								OMIM:184755	PMID: 16685654
mucopolysaccharidosis IIIA	lysosomal disorder	carbohydrate metabolism	SGSH	SGSH	6448	1	HS1ly,HS2ly,HS3ly,HS4ly	4	4	autosomal recessive	autosomal recessive	Types A, B, C, D. type A is the most severe form	nervous system, liver, spleen, skeletal system	brain,liver,spleen, joints.		heparitin sulfate is excreted in the urine.	carbohydrate		Van de Kamp (1979) reported the incidence as 1 in 24,000	Sivakumur and Wraith (1999) found that bone marrow transplantation did not affect the prognosis favorably, even though neurologic manifestations were not evident.	TP	OMIM:252900
Congenital sucrase-isomaltase deficiency	carbohydrate disorder	carbohydrate metabolism	SI	SI	6476	1	O16G1e,O16G2e,SUCRe	3	3	autosomal recessive	autosomal recessive		digestive system	digestive system(small intestine)		decreased activity of sucrase and isomaltase in duodenal mucosa. In serum-increased calcium	enzyme		1 in 5,000 people of European descent.This condition is much more prevalent in the native populations of Greenland, Alaska, and Canada, where as many as 1 in 20 people may be affected.	diet. Peterson and Herber (1967) noted that enzyme of fungal origin is effective treatment.The invertase (beta-fructofuranosidase) preparation had the advantage of being odorless and tasteless, stable with refrigeration, and effective at low pH. Invertase hydrolyzes only sucrose (in vitro) and reduced or eliminated symptoms in 14 patients.	medications	OMIM:222900	PMID: 16329100
GLUT1 deficiency syndrome	carbohydrate disorder	carbohydrate metabolism	SLC2A1	SLC2A1	6513	1	GLCt1r,GLCtg,MANt1r,GAMt1r,GALt1r,DHAAt1r	6	6	autosomal dominant	autosomal dominant	mild and severe forms.	nervous system, muscle	brain,muscles		decreased glucose and lactate in spinal fluid. Normal serum glucose.	carbohydrate		GLUT1 deficiency syndrome is a rare disorder. Fewer than 100 cases have been reported since the disorder was first identified in 1991.	ketogenic diet. Klepper et al. (2003) reportedconcluded that ethanol, diazepam, chloralhydrate, phenobarbital, and pentobarbital could exacerbate the effect of GLUT1 deficiency on glucose transport into the brain, whereas phenytoin and carbamazepine had no significant inhibitory effects and might be preferable for use in seizure control.	medications	OMIM:606777	http://www.ncbi.nlm.nih.gov/bookshelf/br.fcgi?book=gene&part=glut1
Fanconi-Bickel syndrome	transporter defect	transporter defect	SLC2A2	SLC2A2	6514	1	FRUt1r,GALt1r,GAMt1r,GLCt1r,MANt1r	5	5	autosomal recessive	autosomal recessive		nervous system, skeletal system, liver, kidney, pancreas	nervous system, bone, liver, kidney, pancreas		in serum-increased Phosphatase, alkaline but decreased Phosphorus, inorganic and Potassium. In urine-increased Albumin (intermittend albuminuria),calcium,galactose,inorganic phosphorous and uric acid.	enzyme	serum alkaline phosphatse(20.00-150.00 U/l),serum potassium(3.50-5.50 mmol/l )(metaboilc information centre)		cornstarch, uncooked high-caloric nutrition no specific treatment potassium supportive/symptomatic therapy vitamin D	diet	OMIM:227810	PMID: 18626436
hereditary spherocytosis-4	blood disorders	blood disorders	SLC4A1	SLC4A1	6521	1	HCO3_CLt	1	1	autosomal dominant	autosomal dominant											OMIM:612653
distal renal tubular acidosis type 1	transporter defect	transporter defect	SLC4A1	SLC4A1	6521	1	HCO3_CLt	1	1	autosomal dominant	autosomal dominant		kidney	kidneys		increased serum sodium, potassium	mineral			sodium bicarbonate	medications	OMIM:179800
Glucose-galactose malabsorption	transporter defect	transporter defect	SLC5A1	SLC5A1	6523	1	GALt2_2,GALt4_2,GLCt2_2,GLCt4_2,H2Ot,Nat, UREAt,UREAt5,	9	8	autosomal recessive	autosomal recessive		digestive system	Gastro-intestinal system		increaesd galactose in serum, increased glucose in stool and urine.	carbohydrate		Glucose-galactose malabsorption is a rare disorder; only a few hundred cases have been identified worldwide. However, as many as 10 percent of the population may have a somewhat reduced capacity for glucose absorption without associated health problems. This condition may be a milder variation of glucose-galactose malabsorption.	galactose-free diet low-glucose diet	diet	OMIM:606824	PMID: 19852331
Bartter syndrome, type 1	sodium-potassium-chloride cotransporter	transporter defect	SLC12A1	SLC12A1	6557	1	NKCC2t,NKCCt	2	2	autosomal recessive	autosomal recessive		kidney, skeletal system	kidneys, bones		amniotic fluid contains high chloride, moderate hypokalemic metabolic alkalosis, hyperprostaglandinuria,	lipid		treated with inhibitors of prostaglandin synthesis			OMIM:601678	PMID: 17998760
Allan-Herndon-Dudley syndrome	thyroid hormone disorder	hormone metabolism	SLC16A2	SLC16A2	6567	1	THYOXt2,TRIODTHYt2	2	2	X-linked recessive	X-linked	A few missense mutations (p.Ser194Phe, p.Leu434Trp, p.Leu568Pro) and the deletion of a single amino acid (p.F501del) have been associated with milder psychomotor delays, including some speech development, some reading/writing, and/or the ability to walk without support despite ataxia [Jansen et al 2008, Visser et al 2009]. Independent walking and speech development are unusual in affected males w…	nervous system, muscle	nervous system, muscles		All affected males tested to date have had pathognomonic thyroid test results including high serum 3,3’,5-triiodothyronine (T3 ) concentration and low serum 3,3’,5’-triiodothyronine (reverse T3 or rT3) concentration. Serum tetraiodothyronine (thyroxine or T4) concentration is often reduced, but may be within the normal range; serum TSH concentrations are normal or slightly elevated. Molecular gen…	steroid		About 25 families with individuals affected by this condition have been reported worldwide.	Physical, occupational, and speech therapies, if necessary. Anticholinergics, L-DOPA, carbamazepine, or lioresol for the treatment of dystonia. Glycopyrolate or scopolamine to reduce drooling. Standard antiepileptic drugs to control seizures, if present. Placement of permanent feeding tube to maintain caloric intake.	medications	OMIM:300523	http://www.ncbi.nlm.nih.gov/bookshelf/br.fcgi?book=gene&part=thctd
systemic carnitine deficiency	fatty acid disorders	lipid metabolism	SLC22A5	SLC22A5	6584	1	CRNt	1	5	autosomal recessive	autosomal recessive	systemic carnitine decificiency,muscle carnitine deficiency	nervous system, heart, muscle, liver	brain,heart,muscle,liver.	high-affinity carnitine transporter expressed in muscle, heart, kidney, lymphoblasts, and fibroblasts. The defect is expressed as impaired fatty acid oxidation in skeletal and heart muscle.Stanley et al. (1991)-defect appeared to be expressed also in muscle and kidney.-OMIM:212140. myopathic carnitine deficiency (OMIM:212160) is restricted to skeletal muscle	decreased free and total carnitine,increased urinary dicarboxylic fatty acids	free carnitine	carnine uptake-0.27-0.64 pmol/min/mg protein(mic), plasma total carnatine-40.00-60.00 µmol/l(mic), C2-12.40-50.70 µmol/l in blood(metabolic information centre)	1 in 100,000 newborns.in japan 1 in every 40,000 newborns	L-carnitine	medications	OMIM:212140	progree in lipid research 49 (2010),61-75,
Snyder-Robinson syndrome	amino acid disorders	amino acid metabolism	SMS	SMS	6611	1	SPRMS	1	1	X-linked recessive	X-linked		nervous system, skeletal system	nervous system, skeletal system								OMIM:309583	PubMed: 18550699
5-alpha reductase deficiency	steroid metabolism	hormone metabolism	SRD5A2	SRD5A2	6716	1	SR5AR2r, SR5ARr	2	2	autosomal recessive	autosomal recessive	2 types. Leshin et al. (1978) suggested the existence of two forms of 5-alpha-reductase deficiency. In one form (represented by a family in Dallas and by the Dominican kindred), an abnormal Km for substrate and low activity suggested a structural alteration in the enzyme. In a second form, represented by a Los Angeles family, activity in the biopsy specimen was not detectable, although cultured f…	gonads, breast	testes , breast , genital organs .	MALE PSEUDOHERMAPHRODITISM DUE TO 5-ALPHA-REDUCTASE DEFICIENCY					androgen therapy	medications	OMIM:264600 http://ghr.nlm.nih.gov/condition/5-alpha-reductase-deficiency
tyrosinemia type II	amino acid disorders	amino acid metabolism	TAT	TAT	6898	1	TYRTAm, PHETA1m	2	2	autosomal recessive	autosomal recessive		nervous system	brain	Tallab (1996) reported corneal opacities and patchy hyperkeratotic yellow-white papules and plaques on palms and soles.	in plasma-increased tyrosine. In urine-elevated 4-OH-phenyllactic acid,4-OHphenylacetic acid,4-Ohphenylpyruvic acid etc.	amino acid	plasma tyrosine-55.00-147.00 µmol/l(metabolic information centre)	1 in 250,000 individuals	low-protein diet phenylalanine-restricted diet tyrosine-restricted diet	diet	OMIM:276600	PMID: 11589874
thromboxane synthetase deficiency	prostaglandin metabolism	lipid metabolism	TBXAS1	TBXAS1	6916	1	TXASr	1	1	autosomal recessive	autosomal recessive		digestive system, platelets	GI system, platelets								OMIM:274180	PMID: 7925341
orotic aciduria	nucleotide metabolism	nucleotide metabolism	UMPS	UMPS	7372	1	OMPDC, ORPT	2	2	autosomal recessive	autosomal recessive		heart, muscle, nervous system	heart, muscle, nervous sytem		increased Orotic acid in urine and plasma. Decreased blood hemoglobin.	organic acid	blood Hb=12.00-15.00 g/dl, plasma orotic acid =0.00-0.50 µmol/l and in urine=0.00-11.00 mmol/mol creatinine. (hmdb)		corticosteroids uridine	medications	OMIM:258900
Porphyria cutanea tarda (PCT)	heme biosythesis disorder	heme biosythesis disorder	UROD	UROD	7389	1	UPPDC1	1	1	autosomal dominant	autosomal dominant	1)Reduced liver and red cell uroporphyrinogen decarboxylase activity has been reported in familial (Kushner et al., 1976; Lehr and Doss, 1981) and sporadic cases of porphyria cutanea tarda (Elder et al., 1978; Felsher et al., 1978). 2)Hepatoerythropoietic porphyria (HEP) is a severe form of cutaneous porphyria that presents in infancy and is characterized biochemically by excessive excretion of a…	skin	skin		decreased Uroporphyrinogen decarboxylase activity in erythrocytes. High levels of porphyrins in urine,feces and plasma.	porphyrin		The incidence of PCT varies from approximately 1 in 25,000 in the United States to approximately 1 in 5,000 in the Czech Republic and Slovakia (review by Lambrecht et al., 2007),common in the Bantu races in South Africa in association with iron overload (Barnes, 1955).	avoidance of precipitating factors chloroquine phlebotomy	medications	OMIM:176100	http://ghr.nlm.nih.gov/condition/porphyria
congenital erythropoietic porphyria/Gunther disease	heme biosythesis disorder	heme biosythesis disorder	UROS	UROS	7390	1	UPP3S	1	1	autosomal recessive	autosomal recessive	1)one type is associated with lifelong overproduction of series I porphyrins which circulate and are deposited in many tissues, causing light-sensitization and severe damage to skin beginning in childhood. 2)second type observed In the newborn period-the patient developed intense jaundice with hepatosplenomegaly associated with diffuse bleeding and thrombocytopenia. 3)Adult-Onset Form-Deybach et …	skin, liver, spleen	skin, liver, spleen		increased porphyrins seen in erythrocytes,feces,plasma and urine. Uroporphyrinogen III cosynthase activity decreased in erythrocytes.	porphyrin		Congenital erythropoietic porphyria is exceedingly rare; as of 1997, about 130 cases had been reported (Fritsch et al., 1997).	avoidance of trauma to the skin beta-carotene bone marrow transplantation minimal exposure to the sun transfusions	TP	OMIM:263700	http://ghr.nlm.nih.gov/condition/porphyria
xanthinuria type 1	nucleotide metabolism	nucleotide metabolism	XDH	XDH	7498	1	XANDp,XAO2x,XAOx	3	3	autosomal recessive	autosomal recessive	2 types. In type I there is an isolated deficiency of xanthine dehydrogenase, and in type II there is a dual deficiency of xanthine dehydrogenase and aldehyde oxidase (603592). Type I patients can metabolize allopurinol, whereas type II patients cannot (Simmonds et al., 1995). Xanthinuria also occurs in molybdenum cofactor deficiency (252150).	kidney, ureter	kidney,ureter		in serum-low uric acid, in plasma-increased xanthine, in urine- Hypoxanthine increases, Uric acid decreases and Xanthine increases.	N-base	plasma xanthine(-5.00 µmol/l),serum uric acid(0.60-5.50 mg/dl), urine uric acid( 5.00-17.00 mmol/g creatinine), urine xanthine(0.02-0.07 mmol/24h)-metabolic information centre	1:45000	avoidance of specific drugs extracorporeal shock-wave lithotripsy high fluid intake lithotomy low-purine diet	diet	OMIM:278300	PMID: 2273608
Succinic semialdehyde dehydrogenase deficiency	amino acid disorders	amino acid metabolism	ALDH5A1	ALDH5A1	7915	1	SSALxm	1	4	autosomal recessive	autosomal recessive	No genotype-phenotype correlations have been observed.	muscle, nervous system	muscles, nervous system		decreased Succinic semialdehyde dehydrogenase in lymphoblast. In plasma-increased 4-Hydroxybutyric acid,Glycine,Succinic semialdehyde. Increased gamma-Aminobutyric acid in spinal fluid. In urine- elevated levels of 2,4-Dihydroxybutyric acid,3,4-Dihydroxybutyric acid,4-Hydroxybutyric acid,Glycine,Succinic semialdehyde.	enzyme		Approximately 350 people with succinic semialdehyde dehydrogenase deficiency have been reported worldwide.	symptomatic therapy vigabatrin	no treatment	OMIM:271980	http://www.ncbi.nlm.nih.gov/bookshelf/br.fcgi?book=gene&part=ssadh
pyruvate dehydrogenase (PDH) complex deficiency	carbohydrate disorder	carbohydrate metabolism	PDHX	PDHX	8050	1	PDHm	1	3				nervous system	nervous system								OMIM:608769
Infantile neuroaxonal dystrophy	lipid disorder	lipid metabolism	PLA2G6	PLA2G6	8398	1	PLA2_2	1	1	autosomal recessive	autosomal recessive	Classic and Atypical form.	nervous system, muscle	nervous system, muscles		Tissue biopsy,Molecular Genetic Testing	gene analysis		Infantile neuroaxonal dystrophy is a very rare disorder. Its specific incidence is unknown.	Pharmacologic treatment of spasticity and seizures,Trial of oral or intrathecal baclofen for those with atypical INAD who have significant dystonia,Treatment by a psychiatrist for those with a later-onset, more protracted course accompanied by neuropsychiatric symptoms,Over-the-counter fiber supplements and/or stool softeners to treat constipation that is likely caused by a combination of immobil…	diet	OMIM:256600	http://www.ncbi.nlm.nih.gov/bookshelf/br.fcgi?book=gene&part=inad
Rhizomelic chondrodysplasia punctata type 2	ether phospholipids synthesis in peroxisomes	lipid metabolism	GNPAT	GNPAT	8443	1	DHAPAx	1	2														http://ghr.nlm.nih.gov/condition/rhizomelic-chondrodysplasia-punctata, OMIM:222765
Rhizomelic chondrodysplasia punctata, type 3	ether lipid biosynthesis	lipid metabolism	AGPS	AGPS	8540	1	AGPSx	1	1														http://ghr.nlm.nih.gov/condition/rhizomelic-chondrodysplasia-punctata, OMIM:600121
Hyperprolinemia type II	amino acid disorders	amino acid metabolism	ALDH4A1	ALDH4A1	8659	1	P5CDm,PHCDm	2	14	autosomal recessive	autosomal recessive	There are two inherited forms of hyperprolinemia, called type I and type II.Hyperprolinemia type II results in proline levels in the blood between 10 and 15 times higher than normal, and high levels of a related compound called pyrroline-5-carboxylate.	nervous system	nervous system		Pyrroline-5-carboxylic dehydrogenase activity decreases in lymphocytes. In plasma-elevated levels of Proline. In serum-increased Ornithine . In urine-high levels of glycine,proline and hydroxyproline.	enzyme		Hyperprolinemia type II is a rare condition; its prevalence is unknown.	no treatment indicated/recommended	no treatment	OMIM:239510	PMID: 9700195 , http://ghr.nlm.nih.gov/condition/hyperprolinemia
SUCLA2-Related Mitochondrial DNA Depletion Syndrome, Encephalomyopathic Form, with Mild Methylmalonic Aciduria	carbohydrate disorder	carbohydrate metabolism	SUCLA2	SUCLA2	8803	1	SUCOASm	1	3	autosomal recessive	autosomal recessive		nervous system, muscle	nervous system, muscles		Creatinine kinase ,lactate,transaminases increased in blood. In uine large amonts of dicarboxylic acids.	organic acid		17 individuals of different ethnic origins have been reported	Physical therapy and stretching exercises to promote mobility and prevent contractures Mechanical assistance such as wheelchairs to help mobility Respiratory aids such as nasal intermittent positive pressure ventilator when indicated Bracing to treat scoliosis or kyphosis Baclofen therapy alone or in combination with other medications had the best and longest-lasting effect in the treatment of dy…	medications	OMIM:612073	http://www.ncbi.nlm.nih.gov/bookshelf/br.fcgi?book=gene&part=sucla2-def
congenital disorder of glycosylation type 1E (CDG1E)	N-Glycan Biosynthesis	carbohydrate metabolism	DPM1	DPM1	8813	1	DOLPMT_L, DOLPMT_U	2	2				nervous system	nervous system		Antithrombin III (AT III) decreased in plasma,	antithrombin					OMIM:608799	PMID: 10642602
Lysinuric protein intolerance	amino acid disorders	amino acid metabolism	SLC7A7	SLC7A7	9056	1	SERLYSNaex	1	1	autosomal recessive	autosomal recessive	Genotype-phenotype correlations have not been found.	liver, spleen, skeletal system, muscle, kidney, respiratory system, nervous system, immune system, pancreas	liver,spleen,bone,muscles,kidneys,lungs,brain,immune system,pancreas	Oyanagi et al. (1970) reported mild intestinal malabsorption syndrome.	in serum-decreased carnitine, increased ferritin,LDH and TBG. In urine-lysine,ornitihne,orotic acid after protein load etc.	amino acid	Ammonia, after protein load-25.00-80.00 µmol/l in blood, serum LDH-120.00-330.00 U/l, serum-Thyroxine binding globuline (TBG)-22.00-42.00 mg/dl(metabolic information centre)	1 in 60,000 newborns in Finland and 1 in 57,000 newborns in Japan	citrulline immune globuline, intravenous L-carnitine low-protein diet lung lavage lysine	diet	OMIM:222700	http://www.ncbi.nlm.nih.gov/bookshelf/br.fcgi?book=gene&part=lpi
Type 2 primary hyperoxaluria	amino acid disorders	amino acid metabolism	GRHPR	GRHPR	9380	1	GLYCLTDy,HPYRRy,LALDD	3	3	autosomal recessive	autosomal recessive	The low prevalence of PH2 does not allow genotype-phenotype correlations at the present time.	kidney	kidney		increased oxalate and glyceric acid etc.	organic acid	in urine-L-Glyceric acid (0.00-9.00 mmol/mol creatinine),Oxalate ( 0.00-54.00 mmol/mol creatinine)(metabolic information centre)	unknown, it is less common than type 1. 24 cases have been reported so far.			OMIM:260000	http://www.ncbi.nlm.nih.gov/bookshelf/br.fcgi?book=gene&part=ph2#ph2.Differential_Diagnos
Hyperlysinemia I, familial	amino acid disorders	amino acid metabolism	AASS	AASS	10157	1	SACCD3m	1	2	autosomal recessive	autosomal recessive		nervous system	brain	Ghadimi et al. (1965) reported impaired sexual development, lax ligaments and muscles.	in plasma-increased lysine and pipecolic acid. In urine-increased lysine and saccharopine.	amino acid	plasma lysine-48.00-284.00 µmol/l, plasma Pipecolic acid -0.40-4.90 µmol/l, urine-lysine 7.00-29.00 mmol/mol creatinine(metabolic information centre)				OMIM:238700	PMID: 17513445,PMID: 463877
hyperlysinemia II or saccharopinuria	amino acid disorders	amino acid metabolism	AASS	AASS	10157	1	SACCD4m	1	2	autosomal recessive	autosomal recessive		nervous system	brain		in plasma and urine-incresed citrulline,lysine and saccharopine.	amino acid	plasma citrulline-12.00-55.00 µmol/, plasma-lysine-48.00-284.00 µmol/l, in urine- citrulline-1.00-7.00 mmol/mol creatinine, urine-lysine 7.00-29.00 mmol/mol creatinine(metabolic information centre)				OMIM:268700	PMID: 5690339
Type II citrullinemia	urea cycle disorder	amino acid metabolism	SLC25A13	SLC25A13	10165	1	3SALAASPm,ASPGLUm,GLUt2m	3	3	autosomal recessive	autosomal recessive	two types-1) adult onset and 2) neonatal onset.	nervous system, liver	nervous system. Ohura et al. (2001) reported involvement of liver in neonatal onset form but no brain development was normal. (OMIM:605814)		increased blood Ammonia,elevated Citrulline in plasma. In urine-increased levels of Argininosuccinate.	amino acid		found primarily in the Japanese population, where it occurs in an estimated 1 in 100,000 to 230,000 individuals. primarily in the Japanese population,also been reported in other populations, including people from East Asia and the Middle East.	arginine-HCl liver transplantation sodium pyruvate	TP	OMIM:603471	http://www.ncbi.nlm.nih.gov/bookshelf/br.fcgi?book=gene&part=citrin PMID: 11343052
NICCD(Neonatal intrahepatic cholestasis caused by citrin deficiency)	transporter defect	transporter defect	SLC25A13	SLC25A13	10165	1	3SALAASPm,ASPGLUm,GLUt2m	3	3	autosomal recessive	autosomal recessive	The two phenotypes of citrin deficiency are citrullinemia type II (CTLN2) and neonatal intrahepatic cholestasis caused by citrin deficiency (NICCD).	liver	liver		blood-elevated Acetylcarnitine (C2),Palmitoylcarnitine (C16) ,Phenylalanine ,Propionylcarnitine (C3) ,Stearoylcarnitine (C18) . In plasma-increased alpha-Fetoprotein ,Carnitine, free ,Citrulline ,met,thr and tyr. Bilirubin,galactose and protein increased in serum.4-Hydroxyphenyllactic acid in urine.	acylcarnitine		Lu et al. (2005) estimated the frequencies of SLC25A13 homozygotes to be 1 in 19,000 in Japan, 1 in 50,000 in Korea, and 1 in 17,000 in China.	supportive/symptomatic therapy	no treatment		http://www.ncbi.nlm.nih.gov/bookshelf/br.fcgi?book=gene&part=citrin
Ornithine translocase deficiency/HHH (hyperornithinemia, hyperammonemia, homocitrullinuria) syndrome.	urea cycle disorder	amino acid metabolism	SLC25A15	SLC25A15	10166	1	ORNt3m,ORNt4m	2	5	autosomal recessive	autosomal recessive		nervous system, liver	nervous system, liver.		increased blood ammonia. In plasma-Coagulopathy/abnormal Coagulation factors, increased levels of Glutamine and ornithine. In urine-high levels of 2-Aminopiperid-2-one ,Homocitrulline,citrulline(under treatment),lysine,ornithine and orotic acid.	amino acid		Fewer than 100 affected individuals have been reported worldwide.	arginine-HCl citrulline low-protein diet ornithine	diet	OMIM:238970, http://ghr.nlm.nih.gov/condition/ornithine-translocase-deficiency	http://www.ncbi.nlm.nih.gov/bookshelf/br.fcgi?book=gene&part=ucd-overview#ucd-overview.Ornithine_Translocas
congenital disorder of glycosylation type Id	carbohydrate disorder	carbohydrate metabolism	ALG3	ALG3	10195	1	DOLPMT1_Ler,DOLPMT1_Uer	2	2	autosomal recessive	autosomal recessive		nervous system	nervous system		accumulation of the LLO(lipid-linked oligosaccharide) intermediate and, due to its leaky nature, a residual formation of full-length LLOs. In serum-abnormal Transferrin upon isoelectric focusing (transferrin is a protein so classified under amino acid)	amino acid					OMIM:601110	PMID: 18679822
Berardinelli-Seip congenital lipodystrophy type 1	lipid disorder	lipid metabolism	AGPAT2	AGPAT2	10555	1	AGPAT1	1	1	autosomal recessive	autosomal recessive	1)Neonatal or infantile-severe form 2)Juvenile presentation 3)Adult presentation.	nervous system, liver, heart, muscle	nervous system, liver, heart, muscles.		lipoatrophy affecting the trunk, limbs, and face; acromegaloid features; hepatomegaly; elevated serum concentration of triglycerides; and insulin resistance.	lipid		Berardinelli-Seip congenital lipodystrophy has an estimated prevalence of 1 in 10 million people worldwide. Although this condition has been reported in populations around the world, it may be more common in certain regions of Lebanon, Brazil, and Portugal.	restriction of total fat intake between 20% and 30% of total dietary energy maintains normal triglyceride serum concentration. Diabetes mellitus is managed as in childhood-onset diabetes mellitus.	diet	OMIM:269700	http://www.ncbi.nlm.nih.gov/bookshelf/br.fcgi?book=gene&part=bscl
Glutamate formiminotransferase deficiency	amino acid disorders	amino acid metabolism	FTCD	FTCD	10841	1	FTCD,GluForTx	2	2	autosomal recessive	autosomal recessive	severe and mild forms.Individuals affected by the severe form of this disorder have profound intellectual disability and delayed development of motor skills such as sitting, standing, and walking.People with the mild form of glutamate formiminotransferase deficiency have minor delays in physical and mental development and may have mild intellectual disability.	nervous system	central and peripheral nervous system.		Very large amounts of FIGLU were excreted in the urine. The level of folic acid in the blood was increased. Hyperfolicacidemia followed histidine loading.	organic acid		approximately 20 affected individuals have been identified. Of these, about one-quarter have the severe form of the disorder. Everyone reported with the severe form has been of Japanese origin.			OMIM:229100	PMID: 12815595
Malonyl-coenzyme A (CoA) decarboxylase deficiency	organic acid disorders	lipid metabolism	MLYCD	MLYCD	23417	1	MCD,MCDm,MCDp	3	6	autosomal recessive	autosomal recessive		nervous system, heart	brain,heart	OMIM:248360	in urine-increased acylcarnitine/carnitine,adipic acid,suberic acid,ethylmalonic acid,methylmalonic acid etc.	acylcarnitine	Malonyl-CoA decarboxylase activity -8.20-15.70 nmol/h/mg protein in fibroblast,Acylcarnitine/carnitine ratio -1.00-1.50 no unit(urine) (metabolic information centre)	fewer than 30 cases have been reported	low-fat diet	diet		PMID: 6145813
Isobutyryl-coenzyme A (CoA) dehydrogenase (IBD)	organic acid disorders	amino acid metabolism	ACAD8	ACAD8	27034	1	ACOAD9m	1	3	autosomal recessive	autosomal recessive		heart, muscle, RBC	heart,muscle,RBCs	OMIM:611283	in blood increased butyryl/isobutyrylcarnitine; in urine-increased isobutyrylglycine	acylcarnitine		22 cases have been reported in the medical literature	L-carnitine supplementation,avoid fasting and low valine food plan	medications		www.newbornscreening.info/Parents/.../Isobut.pdf
Congenital disorder of glycosylation, type Ic	N-Glycan Biosynthesis	carbohydrate metabolism	ALG6	ALG6	29929	1	DOLPGT1_Ler,DOLPGT1_Uer	2	2			2 types. CDGs can be divided into 2 types, depending on whether they impair lipid-linked oligosaccharide (LLO) assembly and transfer (CDG I), or affect trimming of the protein-bound oligosaccharide or the addition of sugars to it (CDG II) (Orlean, 2000).	nervous system, muscle	nervous system, muscles		in serum-increased transaminases during infection and abnormal Transferrin upon isoelectric focusing.	enzyme					OMIM:603147	PMID: 16321363
Renal tubular acidosis, distal, autosomal recessive	Transport, Lysosomal	transporter defect	ATP6V0A4	ATP6V0A4	50617	1	ATPasel	1	1	autosomal recessive	autosomal recessive		kidney, skeletal system	kidneys, bones		systemic metabolic acidosis	organic acid			Alkali replacement	medications	OMIM:602722	PMID: 10973252
distal renal tubular acidosis (dRTA	transporter defect	transporter defect	ATP6V0A4	ATP6V0A4	50617	1	ATPasel	1	1	autosomal recessive	autosomal recessive		kidney	kidneys								OMIM:602722
essential pentosuria	carbohydrate disorder	carbohydrate metabolism	DCXR	DCXR	51181	1	XYLUR	1	1	autosomal recessive	autosomal recessive			no apparent clinical dysfunction. (stanbury book)		L-Xylulose in urine.	carbohydrate		Pentosuria occurs almost exclusively in Jews. The frequency in American Jews is estimated at 1 in 2,000 to 2,500 (Hiatt, 2001).			OMIM:260800	OMIM:260800 , Hiatt, H. H. Pentosuria. In: Scriver, C. R., Beaudet, A. L., Sly, W. S., Valle, D. (eds.) The Metabolic and Molecular Bases of Inherited Disease. Vol. I. New York: McGraw-Hill 8th ed. 1589-1599, 2001.
Crigler-Najjar syndrome type I/Gilbert syndrome/Crigler-Najjar syndrome type II	bile acid metabolism	bilirubin metabolism	UGT1A1	UGT1A1	54658	1	UGT1A2r	1	4	type 1 is autosomal recessive and type 2 is autosomal dominant .	autosomal recessive or autosomal dominant	2 types- type 1 and type 2	nervous system	brain		Bilirubin level increases in serum. Liver UDP-glucuronyltransferase activity decreases.	enzyme			avoidance of specific drugs cholestyramine exchange transfusion liver transplantation phototherapy supportive/symptomatic therapy. In addition phenobarbital in type 2.	TP	OMIM:218800, OMIM:143500 . mutation in the same gene causes the other two diseases.
Pyridoxal 5'-phosphate-dependent epilepsy	vitamin disorder	vitamin metabolism	PNPO	PNPO	55163	1	PDX5PO,PYAM5POr	2	2	autosomal recessive	autosomal recessive		nervous system, muscle	nervous system, muscles		glycine and threonine elevated in spinal fluid and plasma.	amino acid		Pyridoxal 5'-phosphate-dependent epilepsy is a rare condition; approximately 14 cases have been described in the scientific literature.	pyridoxal-5-phosphate	medications	OMIM:610090	PubMed: 18024216
Methylmalonic aciduria III	amino acid disorders	amino acid metabolism	MCEE	MCEE	84693	1	MMEm	1	1				nervous system	brain		Methylmalonic acid in cerebrospinal fluid was moderately increased, Urine organic acids indicated severe ketonuria and elevated methylmalonic and methylcitric acid	organic acid			reduction of dietary protein	diet	OMIM:251120	http://web.ebscohost.com/ehost/pdfviewer/pdfviewer?vid=2&hid=109&sid=07ed03a6-678c-46fa-b9bc-49935813f3a8%40sessionmgr112
Leber congenital amaurosis type 3	vitamin disorder	vitamin metabolism	RDH12	RDH12	145226	1	RDH1a ,RDH2a,RDH3a	3	3	autosomal recessive. When Leber congenital amaurosis is caused by mutations in the CRX or IMPDH1 genes, the disorder has an autosomal dominant pattern of inheritance	autosomal recessive or autosomal dominant	Hanein et al [2004], Perrault et al [2004] identified 11 distinct mutations of the RDH12 gene in 8/44 individuals with LCA characterized by congenital severe progressive rod-cone dystrophy. All eight with RDH12 mutations had a clinical course similar to that of individuals with RPE65 mutations: mild or absent hyperopia, transient improvement of visual acuity, and eventual macular atrophy with sev…	eye, nervous system	retina, nervous system		electroretinogram. Molecular genetic testing is clinically available for the 12 genes currently known to be associated with LCA: GUCY2D (locus name: LCA1), RPE65 (LCA2), SPATA7 (LCA3), AIPL1 (LCA4), LCA5 (LCA5), RPGRIP1 (LCA6), CRX (LCA7), CRB1 (LCA8), CEP290 (LCA10), IMPDH1 (LCA11), RD3 (LCA12), and RDH12 (LCA13). Together these genes are estimated to account for, depending on the survey, about …	gene analysis		Leber congenital amaurosis occurs in 2 to 3 per 100,000 newborns. It is one of the most common causes of blindness in children	Treatment is supportive.Affected individuals benefit from correction of refractive error, use of low-vision aids when possible, and optimal access to educational and work-related opportunities.	no treatment	http://ghr.nlm.nih.gov/condition/leber-congenital-amaurosis, OMIM:612712	http://www.ncbi.nlm.nih.gov/bookshelf/br.fcgi?book=gene&part=lca
N-acetylglutamate synthase deficiency	urea cycle disorder	amino acid metabolism	NAGS	NAGS	162417	1	ACGSm	1	1	autosomal recessive	autosomal recessive		nervous system	nervous system		N-acetylglutamate synthetase activity decreases in liver, increased blood ammonia. In plasma-Citrulline decreases, where as Alanine ,glutamine and ornithine levels are high. In urine-low levels of orotic acid.	enzyme		N-acetylglutamate synthase deficiency is a very rare disorder. Only a few cases have been reported worldwide, and the overall incidence is unknown.	carbamylglutamate low-protein diet	diet	OMIM:237310	http://www.ncbi.nlm.nih.gov/bookshelf/br.fcgi?book=gene&part=ucd-overview, http://ghr.nlm.nih.gov/condition/n-acetylglutamate-synthase-deficiency
Isovaleric acidemia	organic acid disorders	amino acid metabolism	IVD	IVD	3712	1	ACOAD8m	1	1	autosomal recessive	autosomal recessive	2 forms- 1)the acute neonatal form, leading to massive metabolic acidosis from the first days of life and rapid death (e.g., Newman et al., 1967). 2)chronic form in which periodic attacks of severe ketoacidosis occur with asymptomatic intervening periods (e.g., Tanaka et al., 1966).-OMIM:243500	nervous system	brain(CNS)	Sidbury et al. (1967) reported moderate hepatomegaly-OMIM:243500	in blood increased isovaleryl carnitine/C5,in urine-increased hydroxy acylcarnitine(C4OH,C5OH etc).	acylcarnitine		1 in 250,000 people in the United States	amino acid mixture glycine L-carnitine low-protein diet	diet		PMID: 16602101
Tyrosinemia type 1	amino acid disorders	amino acid metabolism	FAH	FAH	2184	1	FUMAC	1	1	autosomal recessive	autosomal recessive	No correlation is observed between clinical presentation and genotype. Both acute and chronic forms have been seen in the same families, as well as in unrelated individuals with the same genotype [Poudrier et al 1998].	nervous system, liver, kidney	brain,liver,kidney	Perry et al. (1965) reported pancreatic islet hypertrophy.	in plasma-increased aplhafeto protein,coagulation factors,methionine and tyrosine. In urine-elevated 4-OH-phenyllactic acid,4-OHphenylacetic acid,4-Ohphenylpyruvic acid etc.	amino acid	plasma-Methionine -9.00-42.00 µmol/l , Tyrosine -55.00-147.00 µmol/l(metabolic information centre)	1 person in 100,000. in Quebec is about 1 in 16,000 individuals.	liver transplantation NTBC (2-(2-nitro-4-trifluoro-methylbenzoyl)-1,3-cyclo-hexanedione) phenylalanine-restricted diet tyrosine-restricted diet vitamin D	TP	OMIM:276700	http://www.ncbi.nlm.nih.gov/bookshelf/br.fcgi?book=gene&part=tyrosinemia
Ornithine transcarbamylase deficiency	amino acid disorders	amino acid metabolism	OTC	OTC	5009	1	OCBTm	1	1	X-linked	X-linked		nervous system, liver, skin, hair	nervous system,liver,skin,hair	Anadiotis et al. (2001) reported a 15-year-old male patient with OTC deficiency who developed pancreatitis while taking a low protein diet, citrulline, and sodium phenylbutyrate.	increased NH3 in blood, in plasma-decreased citrulline and ornithine but increased glutamine. In urine-glycine,lysine,orotic acid, uracil increased.transient incrase in 5-oxoproline.	amino acid	blood ammonia-25.00-80.00 µmol/l, plasam-citrulline-10.00-45.00 µmol/,glutamine-376.00-709.00 µmol/l,ornithine-48.00-210.00 µmol/l. Serum urea nitrogen-5.00-15.00 mmol/l, in urine-glycine(950.00 mmol/mol creatinine),lysine( 7.00-29.00 mmol/mol creatinine),orotic acid(0.00-11.00 mmol/mol creatinine), uracil(2.00-22.00 mmol/mol creatinine)-metabolic information centre	1 in every 80,000 people.	arginine-HCl citrulline hemofiltration/hemodialysis/peritonealdialysis liver transplantation low-protein diet sodium benzoate sodium phenylbutyrate	TP	OMIM:311250	http://www.ncbi.nlm.nih.gov/bookshelf/br.fcgi?book=gene&part=ucd-overview
Guanidinoacetate methyltransferase deficiency	amino acid disorders	amino acid metabolism	GAMT	GAMT	2593	1	GACMTRc	1	1	autosomal recessive	autosomal recessive		nervous system, muscle	nervous system and muscles.		increased creatinine in plasma. In serum and urine-decreased creatine but increased guanidoacetate and uric acid.	NPN		Only a few dozen affected individuals have been reported worldwide. Of these, approximately one third are of Portuguese origin.	amino acid mixture arginine-restricted diet creatine monohydrate L-ornithine hydrochlorate sodium benzoate	diet	OMIM:601240	PMID: 20159424
Glucose-6-phosphate dehydrogenase deficiency	carbohydrate disorder	carbohydrate metabolism	G6PD	G6PD	2539	1	G6PDH2r	1	1	X-linked recessive	X-linked	1)The severe Mediterranean type of G6PD deficiency has been associated with severe neonatal jaundice and favism. Favism is hemolytic anemia which results from ingestion of the fava beans.very low enzyme activity and is common in Asian and Mediterranean populations.2)A moderate type of G6PDD with low to moderate enzyme activity is more common in African American men in the United States	RBC	red blood cells		in blood-decreased hemoglobin,increased reticulocytes. In serum-increased bilirubin.	bilirubin		An estimated 400 million people worldwide have glucose-6-phosphate dehydrogenase deficiency. This condition occurs most frequently in certain parts of Africa, Asia, and the Mediterranean. It affects about 1 in 10 African-American males in the United States.	avoidance of specific drugs	medications	OMIM:305900	PMID: 19233695
Mucopolysaccharidosis type I	carbohydrate disorder	carbohydrate metabolism	IDUA	IDUA	3425	1	IDOAASE1ly ,IDOAASE2ly ,IDOAASE3ly,IDOAASE4ly	4	4	autosomal recessive	autosomal recessive	1)Severe MPS I (Hurler Syndrome), 2)Attenuated MPS I (Hurler-Scheie Syndromel Scheie Syndrome). The clinical phenotypes are biochemically indistinguishable [Muenzer 2004].	nervous system, heart, liver, spleen, tongue, eye, skeletal system	brain,heart,liver,spleen,tongue,eye(cornea),skeletal system		decreased activity of alpha-Iduronidase in fibroblast.increased amounts of dermatan sulfate,heparan sulfate and other mucopolysaccharides in urine.	enzyme		Severe MPS I occurs in approximately 1 in 100,000 newborns. Attenuated MPS I is less common and occurs in about 1 in 500,000 newborns.	bone marrow transplantation enzyme replacement therapy supportive/symptomatic therapy	enzyme therapy,TP	OMIM:607014	http://www.ncbi.nlm.nih.gov/bookshelf/br.fcgi?book=gene&part=mps1
GM1-gangliosidosis and Mucopolysaccharidosis type IV type B	carbohydrate disorder	carbohydrate metabolism	GLB1	GLB1	2720	1	GALASE10ly,GALASE11ly,GALASE12ly,GALASE13ly,GALASE14ly,GALASE15ly,GALASE16ly ,GALASE17ly ,GALASE18ly,GALASE19ly,GALASE1ly,GALASE20ly,GALASE3ly,GALASE4ly,GALASE5ly,GALASE6ly,GALASE7ly,GALASE8ly,GALASE9ly,GLB1,LACZly,S6TASE10ly,S6TASE22ly,S6TASE25ly,S6TASE4ly,S6TASE5ly,S6TASE6ly,S6TASE7ly,S6TASE8ly,S6TASE9ly,SIAASE2ly,SIAASE3ly,SIAASE4ly,SIAASEly	34	34	autosomal recessive	autosomal recessive	All of the mutations were located in the coding region common to the GLB1 lysosomal enzyme and its splice variant S-Gal/EBP (elastin-binding protein), and none of the mutant proteins expressed EBP. Functional studies indicated that the mutant proteins resulted in impaired secretion of tropoelastin and inability to assemble elastic fibers, resulting in impaired elastogenesis	skeletal system, eye	skeletal system, eye(cornea)	There is no central nervous system involvement and intelligence is normal.	in fibroblast reduced beta-Galactosidase activity.in urine-increased excretion of Keratan sulfate and Mucopolysaccharides	enzyme			no specific treatment supportive/symptomatic therapy	no treatment	OMIM:253010	PMID: 12393180
Sialuria	carbohydrate disorder	carbohydrate metabolism	GNE	GNE	10020	1	AMANK,UAG2EMAi	2	2	autosomal dominant	autosomal dominant	1) in siluria-the missense pathogenic GNE mutation was detected in the putative allosteric site (codons 263 or 266). 2)In hereditary inclusion body myopathy (hIBM). Homozygous or compound heterozygous GNE mutations are observed outside the allosteric site in the epimerase or the kinase domain [Kayashima et al 2002, Argov et al 2003, Huizing et al 2004, Tomimitsu et al 2004, Huizing 2005].	liver, spleen, RBC, muscle, nervous system, respiratory system	liver,spleen,RBC,muscles,nervous system,respiratory system		1)Increased urinary and intracellular free sialic acid. 2)Molecular genetic testing of the GNE gene with special attention for changes in the allosteric site.	organic acid		Fewer than 10 people worldwide have been diagnosed with sialuria.	antiepileptic drugs and Affected individuals benefit from early developmental intervention and appropriate educational programs.	medications	OMIM:269921	http://www.ncbi.nlm.nih.gov/bookshelf/br.fcgi?book=gene&part=sft
Aspartylglucosaminuria	lysosomal disorder	carbohydrate metabolism	AGA	AGA	175	1	GASNASE2ly,GASNASE3ly,GASNASEly	3	3	autosomal recessive	autosomal recessive	could not be found.	nervous system, skeletal system	nervous system, skeletal system		in urine-increased amounts of 4-N-2-acetamido-2-deoxy-ß-D-glucopyrasonyl-L-asparagine ,Aspartylglucosamine and oligosaccharides.	carbohydrate	in urine-Aspartylglucosamine(0.20-1.00 mmol/mol creatinine)-metabolic information centre	1 in 18,500 people in Finland. This condition is less common outside of Finland, but the incidence is unknown.	bone marrow transplantation	TP	OMIM:208400	PMID: 8405810, http://ghr.nlm.nih.gov/condition/aspartylglucosaminuria
fumarase deficiency	carbohydrate disorder	carbohydrate metabolism	FH	FH	2271	1	FUM,FUMm	2	2	autosomal recessive	autosomal recessive		nervous system, liver, spleen, muscle, RBC	nervous system(brain), liver, spleen, muscles, RBC		increased ammonia and lactate in blood. Increased Fumaric acid in plasma.in urine-2-Oxoglutaric acid ,citrate and fumaric acid are found.	organic acid		Approximately 100 affected individuals have been reported worldwide. Several were born in an isolated religious community in the southwestern United States.	no specific treatment	no treatment	OMIM:606812	http://www.ncbi.nlm.nih.gov/bookshelf/br.fcgi?book=gene&part=fum
Sialic acid storage disease	carbohydrate disorder	carbohydrate metabolism	SLC17A5	SLC17A5	26503	1	ACNAMlt,GLCURtly,IDOURtly	3	3	autosomal recessive	autosomal recessive	1)Salla disease-Homozygosity for the missense mutation p.Arg39Cys, 2)ISSD(Infantile Free Sialic Acid Storage Disease)-Compound heterozygosity for the p.Arg39Cys mutation and another SLC17A5 mutation and homozygosity for the p.Lys136Glu mutation [Biancheri et al 2005]. , 3) intermediate severe Salla disease.these are the only phenotypes known to be associated with mutations in SLC17A5. 4)Compound …	nervous system, muscle, liver, spleen, heart	nervous system, muscles, liver, spleen, heart, nervous system		free sialic acid concentration increases in fibroblast and urine.	organic acid		Sialic acid storage disease is a very rare disorder. ISSD has been identified in only a few dozen infants worldwide. Salla disease occurs mainly in Finland and Sweden and has been reported in approximately 150 people. A few individuals have been identified as having intermediate severe Salla disease.	no specific treatment.		OMIM:269920 and OMIM:604369	http://www.ncbi.nlm.nih.gov/bookshelf/br.fcgi?book=gene&part=issd
Tay-Sach's disease	carbohydrate disorder	carbohydrate metabolism	HEXA	HEXA	3073	1	AHEXASE2ly,AHEXASEly,NACHEX10ly,NACHEX11ly,NACHEX12ly,NACHEX13ly,NACHEX14ly,NACHEX15ly,NACHEX16ly,NACHEX17ly,NACHEX18ly,NACHEX19ly,NACHEX1ly,NACHEX20ly,NACHEX21ly,NACHEX22ly,NACHEX23ly,NACHEX24ly,NACHEX25ly,NACHEX26ly,NACHEX27ly,NACHEX2ly,NACHEX3ly,NACHEX4ly,NACHEX5ly,NACHEX6ly,NACHEX7ly,NACHEX8ly,NACHEX9ly,NACHEXA10ly ,NACHEXA11ly,NACHEXA12ly,NACHEXA13ly,NACHEXA14ly,NACHEXA15ly,NACHEXA16ly ,NACH…	51	51	autosomal recessive	autosomal recessive	1)acute infantile form-with no HEX A enzymatic activity. 2)juvenile or chronic and adult-onset forms-residual but low activity of the HEX A enzyme toward GM2 ganglioside. 3)B1 variant associated with juvenile and chronic hexosaminidase A deficiency.	nervous system, eye, muscle	brain , spinal cord, eye, muscles		Hexosaminidase A activity decreases in serum and fibroblasts. However Hexosaminidase B is normal. In urine-abnormal concentration of Oligosaccharides appear.	enzyme		Tay-Sachs disease is very rare in the general population. The genetic mutations that cause this disease are more common in people of Ashkenazi (eastern and central European) Jewish heritage than in those with other backgrounds. The mutations responsible for this disease are also more common in certain French-Canadian communities of Quebec, the Old Order Amish community in Pennsylvania, and the Ca…	no specific treatment supportive/symptomatic therapy	no treatment	OMIM:272800	http://www.ncbi.nlm.nih.gov/bookshelf/br.fcgi?book=gene&part=tay-sachs
Ribose 5-phosphate isomerase deficiency	carbohydrate disorder	carbohydrate metabolism	RPIA	RPIA	22934	1	RPI	1	1	autosomal recessive	autosomal recessive		nervous system, liver	nervous system, liver		increased levels of D-Arabitol and Ribitol in body fluids.	carbohydrate					OMIM:608611	PMID: 18987987, PMID: 14988808
Porphyria	heme biosythesis disorder	heme biosythesis disorder	ALAS2	ALAS2	212	1	ALASm	1	1	X-linked dominant	X-linked		skin	skin								OMIM:300752	http://ghr.nlm.nih.gov/condition/porphyria, http://ghr.nlm.nih.gov/condition/x-linked-sideroblastic-anemia
Hereditary coproporphyria	heme biosythesis disorder	heme biosythesis disorder	CPOX	CPOX	1371	1	CPPPGO	1	1	autosomal dominant	autosomal dominant	Schmitt et al. (2005) noted that all 5 reported patients (from 3 families) with harderoporphyria had a K404E mutation (612732.0003) in the CPOX gene in homozygosity or compound heterozygosity with a null mutation. Biochemical and expression studies revealed that only a few missense mutations, restricted to 5 amino acids encoded by exon 6 (D400-K404), may accumulate significant amounts of harderop…	nervous system, skin	nervous system, skin		coproporphyrin III:I ratio increased.increased porphyrins in plasma,serum,feces and urine. Decreased serum sodium.	porphyrin			avoidance of precipitating factors glucose infusion (acute) hematin	medications	OMIM:121300	http://ghr.nlm.nih.gov/condition/porphyria
3-beta (β)-hydroxysteroid dehydrogenase (HSD) deficiency	steroid metabolism	hormone metabolism	HSD3B2	HSD3B2	3284	1	HSD3B11r,HSD3B12r,HSD3B13r,HSD3B2r,HSD3B3r	5	5	autosomal recessive	autosomal recessive	1)salt-wasting-hormone production is extremely low. Individuals with this type lose large amounts of sodium in their urine, which can be life-threatening. Individuals affected with the salt-wasting type are usually diagnosed soon after birth due to complications related to a lack of salt reabsorption, including dehydration, poor feeding, and vomiting. 2)non-salt-wasting type-patient produces enou…	gonads, adrenals	gonads (ovaries in females and testes in males),adrenal glands.		in plasma-decreased 17-Hydroxy-Progesteron and increased 16-Hydroxy-dehydroepiandrosterone ,17-Hydoxypregnenolone ,ACTH ,Dehydroepiandrosterone (DHEA) ,Pregnenolone . In serum-decreased cortisol. In urine-increased excretion of 17-Hydoxypregnenolone ,17-Ketosteroids ,Pregnenolone .	steroid		The exact prevalence of 3β-HSD deficiency is unknown. At least 60 affected individuals have been reported.	dexamethasone	medications	OMIM:201810	Scriver's Online Metabolic and Molecular Bases of Inherited Disease (OMMBID): Congenital Adrenal Hyperplasia. PMID: 15671104
21-hydroxylase deficiency	steroid metabolism	hormone metabolism	CYP21A2	CYP21A2	1589	1	P45021A1r,P45021A2r	2	2	autosomal recessive	autosomal recessive	Two types are classic forms, known as the 1)salt-wasting and 2)simple virilizing types. 3)the non-classic type. The salt-wasting type is the most severe, the simple virilizing type is less severe, and the non-classic type is the least severe form. Approximately 75 percent of individuals with classic 21-hydroxylase deficiency have the salt-wasting type. Hormone production is extremely low in this …	adrenals, sex organs	adrenal glands, secondry sex organs in both males and females		in plasma- increased 17-Hydoxypregnenolone ,17-Hydroxy-Progesteron ,21-Deoxycortisol ,ACTH ,Aldosterone ,Androstendione ,Dehydroepiandrosterone (DHEA) ,Progesterone . Decreased cortisol in serum. In urine-increased 17-Ketosteroids and Pregnantriol .	steroid		The classic forms of 21-hydroxylase deficiency occur in 1 in 15,000 newborns. The prevalence of the non-classic form of 21-hydroxylase deficiency is estimated to be 1 in 1,000 individuals. The prevalence of both classic and non-classic forms varies among different ethnic populations. 21-hydroxylase deficiency is responsible for about 95 percent of all cases of congenital adrenal hyperplasia.	adrenalectomy corticosteroids dexamethasone mineralocorticoid sodium chloride	medications	OMIM:201910	http://www.ncbi.nlm.nih.gov/bookshelf/br.fcgi?book=gene&part=cah
Lowe syndrome	lipid disorder	lipid metabolism	OCRL	OCRL	4952	1	PI45P5P	1	1	X-linked	X-linked	To date, correlation of genotype with phenotype has not been established. Differing clinical courses have been noted in unrelated individuals with the same OCRL mutation [Leahey et al 1993]. It is also now apparent that highly deleterious mutations in the OCRL gene that result in total loss of OCRL gene expression occur both in individuals with Lowe syndrome and in individuals with Dent disease, …	eye, nervous system, kidney	eyes, brain, and kidneys		in serum-increased cholesterol,creatinine kinase,LDH,Pi,total protein,transaminases and acid phosphatase. In urine-increase glucose and inorganic phosphorous.	cholesterol	serum-chlesterol( 3.10-5.20 mmol/l),creatinine kinase(40.00-400.00 U/l ),LDH(120.00-330.00 U/l),inorganic phosphorous(1.30-1.90 mmol/l),total protein(6.20-8.00 g/dl ),acid phosphatse(11.00 U/l),transaminases(10.00-30.00 U/)(metabolic information centre)	1 in 500,000 people.	no specific treatment supportive/symptomatic therapy	no treatment	OMIM:309000	http://www.ncbi.nlm.nih.gov/bookshelf/br.fcgi?book=gene&part=lowe
Familial lipoprotein lipase deficiency	lipid disorder	lipid metabolism	LPL	LPL	4023	1	LPS,LPS2	2	2	autosomal recessive	autosomal recessive	There are no known genotype-phenotype correlations.	pancreas, skin, liver, spleen	pancreas, skin, liver and spleen		in plasma-Chylomicrons, fasting state present,decreased Lipoprotein lipase activity. In serum-incresed Triglycerides and uric acid.	enzyme		This condition affects about 1 per million people worldwide. It is much more common in some areas of the province of Quebec, Canada.	low-fat diet medium-chain triglycerides (MCT)	diet	OMIM:238600	http://www.ncbi.nlm.nih.gov/bookshelf/br.fcgi?book=gene&part=lpl
Fanconi renotubular syndrome	transporter defect	transporter defect	SLC34A1	SLC34A1	6569	1	PIt7	1	1	autosomal dominant	autosomal dominant		kidney, skeletal system	kidneys, bones		in serum-increased Parathyroid hormone (PTH) where as decreased Phosphorus, inorganic and Potassium. In urine-increased aminoacids,glucose,Phosphorus, inorganic ,Potassium and a acidic ph.	steroid			kidney transplantation phosphate, neutral potassium sodium bicarbonate supportive/symptomatic therapy vitamin D	TP	OMIM:134600	PMID: 20335586
renal glucosuria	transport defect	transporter defect	SLC5A2	SLC5A2	6524	1	GLCt2r, GLCt4	2	2	autosomal recessive and autosomal dominant	autosomal recessive or autosomal dominant		kidney	kidneys		increased urine glucose.	carbohydrate			no treatment indicated/recommended	no treatment	OMIM:233100
Parkinsonism, susceptibility/Codeine sensitivity/Debrisoquine sensitivity	drug metabolism	xenobiotic metabolism	CYP2D6	CYP2D6	1565	1	P4502D6	1	1														Gene ID: 1565
milder variant of X-linked adrenoleukodystrophy	transport defect of very long chain fatty acids	lipid metabolism	SLC27A2	SLC27A2	11001	1	FAOXC15ATPx	1	14													OMIM:603247
3-methylcrotonyl coA carboxylase deficiency	organic acid disorders	amino acid metabolism	MCCC1 or MCCC2	MCCC1,MCCC2	56922, 64087	2	MCCCrm	1	1	autosomal recessive	autosomal recessive	2 types- 1)3-methylcrotonylglycinuria I is caused by mutation in the gene encoding the alpha subunit of 3-methylcrotonyl-CoA carboxylase(MCCC1). 2)3-methylcrotonylglycinuria II, or MCC2 deficiency, is caused by mutation in the gene encoding the beta subunit of 3-methylcrotonyl-CoA carboxylase (MCCC2)	nervous system, muscle	brain,muscles	1)Bartlett et al. (1984) reported gross neutrophilia-OMIM:210200 2)Beemer et al. (1982) reported transient alopecia,Gibson et al. (1998) reported fatty liver-OMIM:210210. Mutations in the MCCC1 or MCCC2 gene reduce or eliminate the activity of 3-MCC, preventing the body from processing leucine properly. As a result, toxic byproducts of leucine processing build up to harmful levels, which can dama…	increased C5OH in blood.in urine-3-hydroxyisovaleric acid,3-methylcrotonylglycine and ketone bodies are increased.	acylcarnitine		1 in 36,000 newborns worldwide.	biotin glycine high-carbohydrate diet L-carnitine leucine-restricted diet low-protein diet	diet		PMID:5035417
propionic acidemia	organic acid disorders	amino acid metabolism	PCCA or PCCB	PCCA,PCCB	5095, 5096	2	PPCOACm	1	1	autosomal recessive	autosomal recessive		nervous system, muscle, heart	brain,muscles,heart	neutropenia, periodic thrombocytopenia, hypogammaglobulinemia are other features-OMIM:606054. Propionyl-CoA carboxylase also helps break down certain types of fat and cholesterol in the body. Mutations in the PCCA or PCCB gene disrupt the function of the enzyme and prevent the normal breakdown of these molecules. As a result, a substance called propionyl-CoA and other potentially harmful compound…	increased C3 in blood,in plasma increased amounts of propionic acid,glycine,glutamine and total carnitine. In urine-increased OH-propionic and valeric acid etc.	acylcarnitine		1 in 100,000 people in the United States	arginine-HCl frequent feeding glucose infusion (acute) hemofiltration/hemodialysis/peritonealdialysis human growth hormone (hGH) intestinal motility agents L-carnitine low-protein diet metronidazole sodium benzoate sodium bicarbonate sodium phenylacetate	diet		http://emedicine.medscape.com/article/948084-overview, PMID: 7494401
Glycine encephalopathy/ nonketotic hyperglycinemia / NKH	amino acid disorders	amino acid metabolism	AMT or GLDC	AMT, GLDC	275, 2731	2	GCC2am,GCC2bim,GCC2cm,GCCam,GCCbim,GCCcm	6	6	autosomal recessive	autosomal recessive	private nature of many mutations and the early demise without evaluation of ultimate neurodevelopmental outcome makes genotype-phenotype correlations difficult. Clinically the various forms- 1)Neonatal (classic) presentation-The neonatal form of glycine encephalopathy manifests in the first hours to days of life with progressive lethargy, hypotonia, and myoclonic jerks leading to apnea and often …	nervous system	brain	About 80 percent of cases of glycine encephalopathy result from mutations in the GLDC gene, while AMT mutations cause 10 percent to 15 percent of all cases. Mutations in either the AMT or GLDC gene prevent the complex from breaking down glycine properly (http://ghr.nlm.nih.gov/condition/glycine-encephalopathy).	increased levels of glycine in plasma and urine	amino acid	CSF glycine concentration-<20 µmol/L,at age >1 year <12 µmol/L , Plasma glycine concentration-125-450µmol/L,at age >1 year-<350 µmol/L, CSF/plasma glycine ratio -<0.02(gene reviews)	1 in 55,000 newborns in Finland and about 1 in 63,000 newborns in British Columbia, Canada.	dextromethorphane diazepam ketamine N-methyl-D-aspartate modulators sodium benzoate strychnine	medications	OMIM:605899	http://www.ncbi.nlm.nih.gov/bookshelf/br.fcgi?book=gene&part=nkh
Cystinuria	amino acid disorders	amino acid metabolism	SLC3A1 or SLC7A9	SLC3A1, SLC7A9	6519, 11136	2	CYSTSERex,SERLYSNaex	2	4	autosomal recessive	autosomal recessive	Rosenberg et al. (1966) described 3 types of cystinuria based on excretion patterns of presumed heterozygotes- 1)type I heterozygotes showing normal amino aciduria, 2)type II heterozygotes showing high hyperexcretion of cystine, 3)type III show moderate excretion of dibasic amino acids. In contrast to types I and II homozygotes, type III homozygotes showed a nearly normal increase in cystine plas…	kidney, urinary bladder	kidney,bladder	Scriver et al. (1970) presented evidence indicating that cystinuria patients are at increased risk for impaired cerebral function. Mutations in either the SLC3A1 gene or SLC7A9 gene disrupt the ability of the transporter protein complex to reabsorb amino acids, which causes them to become concentrated in the urine. As the levels of cystine in the urine increase, the crystals typical of cystinuria…	in urine-increased arginine,cysteine-homocysteine disulfide,cystine,lysine,ornithine.	amino acid	urine arg-38.00-165.00 µmol/l, cys-30.00-100.00 mmol/mol creatinine ,lys- 7.00-29.00 mmol/mol creatinine, ornithine-2.00-8.00 mmol/mol creatinine(metabolic information centre)	1 in 10,000 people.	2-mercaptopropionylgycine captopril D-penicillamine extracorporeal shock-wave lithotripsy high fluid intake potassium citrate sodium bicarbonate sodium citrate tiopronin	medications	OMIM.220100	PMID: 18840913
Succinate-coenzyme A (CoA) ligase deficiency/LACTIC ACIDOSIS, FATAL INFANTILE	carbohydrate disorder	carbohydrate metabolism	SUCLA2 or SUCLG1	SUCLA2, SUCLG1	8803, 8802	2	SUCOASm	1	6	autosomal recessive	autosomal recessive		nervous system, muscle	nervous system, muscles	Mutations in either the SUCLA2 or SUCLG1 gene disrupt the normal function of succinate-CoA ligase. (http://ghr.nlm.nih.gov/condition/succinate-coa-ligase-deficiency)	pyruvate and lactate elevated in blood.	organic acid		Ostergaard et al. (2007) estimated the incidence of the encephalomyopathic form of mtDNA depletion syndrome with methylmalonic aciduria in the Faroe Islands to be 1 in 1,700.			OMIM:612073 and OMIM:245400	http://www.ncbi.nlm.nih.gov/bookshelf/br.fcgi?book=gene&part=sucla2-def
Glycogen storage disease I	Glycolysis/Gluconeogenesis	carbohydrate metabolism	G6PC or SLC37A4	G6PC, SLC37A4	2538, 2542	2	G6PPer, G6Pter	2	4	autosomal recessive	autosomal recessive	1)GSD type Ia, caused by the deficiency of glucose-6-phosphatase (G6Pase) catalytic activity and 2)GSD type Ib, caused by a defect in glucose-6-phosphate translocase (transporter).	liver, kidney, digestive system, respiratory system, skeletal system	liver, kidneys, small intestines, lungs, bones	The diagnosis of GSDI is based on clinical presentation, abnormal blood/plasma concentrations of glucose, lactate, uric acid, triglycerides, and lipids, and molecular genetic testing. Mutations in G6PC (GSDIa) are responsible for 80% of GSD1 and mutations in SLC37A4 (GSDIb) are responsible for 20% of GSD1. Molecular testing is clinically available for both genes.	Hyperuricemia,hyperlactic acidemia, ketonemia and increased Tryglycerides in serum. Reduced activity of Glucose 6-phosphatase in liver. In urine-increased proteins and ketone bodies.	enzyme		1:100.000	allopurinol cornstarch, uncooked frequent feeding gastric drip feeding at night liver transplantation maltodextrin	TP	OMIM:232200	http://www.ncbi.nlm.nih.gov/bookshelf/br.fcgi?book=gene&part=gsd1
Congenital hypothyroidism	thyroid hormone disorder	hormone metabolism	DUOX2 or TPO	DUOX2,TPO	50506, 7173	2	H2O2syn,IDHPOXOX2b,IDHPOXOX3,IDHPOXOX4,IDHPOXOXb, THYPX	6	6	An estimated 15 to 20 percent of cases are inherited. Many inherited cases are autosomal recessive. Most cases of congenital hypothyroidism are sporadic, which means they occur in people with no history of the disorder in their family. mutation in the PAX8 gene or certain TSHR gene mutations) have an autosomal dominant pattern of inheritance.	autosomal recessive	1)sporadic, 2)familial, 3)goitrous, and 4)non-goitrous congenital forms.	thyroid gland, nervous system	thyroid gland, nervous system	Other forms of thyroid hormone dysgenesis include a form (TDH2A; 274500) caused by mutation in the thyroid peroxidase gene (TPO; 606765) on chromosome 2p25; Pendred syndrome, a form of thyroid hormone dysgenesis associated with deafness (TDH2B; 274600) and caused by mutation in the SLC26A4 gene (605646) on chromosome 7q31; a form (TDH3; 274700) caused by mutation in the thyrogobulin gene (TG; 188…	in serum-increased Thyroid-stimulating hormone (TSH) where as low levels of Thyroxine, free (FT4) and Triiodthyronine, free .	steroid		1 in 3,000 to 4,000 newborns. For reasons that remain unclear, congenital hypothyroidism affects more than twice as many females as males.	L-thyroxine	medications	OMIM:274500, OMIM:607200	http://ghr.nlm.nih.gov/condition/congenital-hypothyroidism , PMID: 20435715
Mitochondrial trifunctional protein deficiency	lipid and organic acid disorder	organic acid disorder	HADHA or HADHB	HADHA,HADHB	3030, 3032	2	ACACT1rm,C2M26DCOAHLm,ECOAH12m,ECOAH1m,ECOAH9m,HACD1m,PRPNCOAHYDm,T2M26DCOAHLm	8	44	autosomal recessive	autosomal recessive	Spiekerkoetter et al. (2003) characterized 15 patients from 13 families with HADHB mutations of the mitochondrial trifunctional protein. Three clinical phenotypes were apparent: 1) a severe neonatal presentation with cardiomyopathy, 2)a hepatic form with recurrent hypoketotic hypoglycemia and 3)a milder, later-onset neuromyopathic phenotype with episodic myoglobinuria.	muscle, liver, heart, nervous system	muscle, liver , heart, nervous system	Mutations in the HADHA or HADHB genes that cause mitochondrial trifunctional protein deficiency disrupt all three functions of this enzyme complex. (http://ghr.nlm.nih.gov/condition/mitochondrial-trifunctional-protein-deficiency)	dimethylheptanoylcarnitine is significantly less. C11/C9 ratio may also be used.(PMID: 16297647)	acylcarnitine		Mitochondrial trifunctional protein deficiency is a rare disorder; its incidence is unknown.	Traditional treatment includes fasting avoidance and consumption of a low-fat, high-carbohydrate diet. A diet higher in protein and lower in carbohydrate may help to lower total energy intake while maintaining good metabolic control.	diet	OMIM:609015	Scriver's Online Metabolic and Molecular Bases of Inherited Disease (OMMBID): Mitochondrial Fatty Acid Oxidation Disorders PMID: 19699128, PMID: 16996288
methylmalonic acidemia (MMA)	organic acid disorders	amino acid metabolism	MMAA or MUT	MMAA, MUT	166785, 4594	2	CBLATm,CBL2tm,MMMm	3	3	autosomal recessive	autosomal recessive	Infantile/non-B12 responsive,B12 responsive ,"Benign" /adult methylmalonic acidemia	nervous system, kidney, pancreas	brain,kidney,pancreas	MUT, MMAA and MMAB-either of these 3 genes defect causes MMA, however about 50% shows mutation in MUT gene. MMAB gene is absent in Recon 1.	in blood-increased C4DC,C3. in plasma-decreased carnitine,increased methylmalonic acid.in urine-aminoisobutyric acid,hydroxypropionic acid,hydroxyvaleric acid etc.	acylcarnitine	Methylmalonic acid-0.00-2.00 mmol/mol creatinine in urine(metabolic information centre), 22.0 (4.3-37.0) uM in blood(adult >18 yrs)(metabolic information centre)	1 in 50,000 to 100,000 people	amino acid mixture cobalamin creatine monohydrate frequent feeding glucose infusion (acute) hemofiltration/hemodialysis/peritonealdialysis kidney transplantation L-carnitine liver-kidney transplantation low-protein diet metronidazole sodium bicarbonate	TP		PMID: 7494401
Homocystinuria	amino acid disorders	amino acid metabolism	CBS or MTHFR or MTR	CBS,MTHFR, MTR	875, 4524, 4548	3	CYSTS,MTHFR3,METS	3	4	autosomal recessive	autosomal recessive	G307S allele -predicts B6 non-responsiveness and I278T allele usually predicts B6 responsiveness-Kraus et al 1999, Gaustadnes et al 2002, Kruger et al 2003	nervous system, skeletal system	brain,skeletal system	less commom forms cause megaloblastic anemia. Mutations in the CBS gene cause the most common form of homocystinuria. Rarely, homocystinuria can be caused by mutations in several other genes. The enzymes made by the MTHFR, MTR, MTRR, and MMADHC genes play roles in converting homocysteine to methionine. Mutations in any of these genes prevent the enzymes from functioning properly, which leads to a…	in plasma-increased ceruloplasmin,coagulation factors,copper,homocysteine,homocystine,methionine and ornithine. In urine-increased cystathionine.homocysteine and homocystine.	amino acid	plasma-Homocystine(<1 µmol/L ),Total homocysteine (<15 µmol/L), Methionine(10-40 µmol/L)-gene reviews	Homocystinuria caused by cystathionine beta-synthase deficiency affects at least 1 in 200,000 to 335,000 people worldwide	aspirin, low dose (?) baclofen betaine folic acid methionine-restricted diet vitamin B12 (hydroxycobalamin) Vitamin B6 (pyridoxine)	medications		Gene Review: Homocystinuria Caused by Cystathionine Beta-Synthase Deficiency/http://www.ncbi.nlm.nih.gov/bookshelf/br.fcgi?book=gene&part=homocystinuria, OMIM:236200
Hypermethioninemia	amino acid disorders	amino acid metabolism	AHCY or GNMT or MAT1A	AHCY, GNMT, MAT1A	191, 27232, 4143	3	AHC,SEAHCYSHYD,GNMT,METAT,SELMETAT	5	5	autosomal recessive and autosomal dominant	autosomal recessive or autosomal dominant		nervous system, liver, muscle	brain,liver,muscles	A deficiency of any of these enzymes (i.e. MAT1A gene provides instructions for producing the enzyme methionine adenosyltransferase, GNMT gene provides instructions for making the enzyme glycine N-methyltransferase, AHCY gene provides instructions for producing the enzyme S-adenosylhomocysteine hydrolase) results in a buildup of methionine in the body, and may cause signs and symptoms related to …	in plasma-increased homocysteine and methionine.in urine-increased methionine.	amino acid		only a small number of cases have been reported.many individuals with hypermethioninemia have no symptoms	diet S-Adenosylmethionine (AdoMet)	diet		PMID: 16702333
Glutaric acidemia type II	fatty acid disorders	lipid metabolism	ETFA or ETFB or ETFDH	ETFA, ETFB, ETFDH	2108, 2109, 2110	3	ETF,ETFQO	2	2	autosomal recessive	autosomal recessive	1)neonatal form and 2)late onset form.	liver, heart, kidney, muscle	liver, heart, kidney, muscles	genital abnormalities may be seen. The disorders resulting from defects in these 3 genes are referred to as glutaric acidemia IIA, IIB, and IIC, respectively, although there appears to be no difference in the clinical phenotypes (OMIM:231680).	in blood-increased C4,C10,C12,C14 and C16. in urine-high levels of 2-Hydroxyglutaric acid (L) ,2-Methylbutyrylglycine ,3-Hydroxyisovaleric acid ,4-Hydroxybutyric acid ,5-Hydroxyhexanoic acid ,Acylcarnitin,Adipic acid ,Ethylmalonic acid ,Glutaric acid ,Hydroxyproline ,Isobutyrylglycine ,Isovalerylglycine ,Proline ,Sebacic acid ,Suberic acid .	acylcarnitine		Glutaric acidemia type II is a very rare disorder; its precise incidence is unknown. It has been reported in several different ethnic groups.	high-carbohydrate diet low-fat diet riboflavin	diet	OMIM:231680	PMID: 12359134
maple syrup urine disease	amino acid disorders	amino acid metabolism	BCKDHA or BCKDHB or DBT or DLD	BCKDHA, BCKDHB, DBT, DLD	593, 594, 1629, 1738	4	OIVD2m,OIVD1m,OIVD3m	3	12	autosomal recessive	autosomal recessive	1)classic and intermediate MSUD(http://www.ncbi.nlm.nih.gov/bookshelf/br.fcgi?book=gene&part=msud). 2)There are 5 clinical subtypes of MSUD: the 'classic' neonatal severe form, an 'intermediate' form, an 'intermittent' form, a 'thiamine-responsive' form, and an 'E3-deficient with lactic acidosis' form-OMIM:248600	nervous system	brain	central respiratory failure-(http://www.ncbi.nlm.nih.gov/bookshelf/br.fcgi?book=gene&part=msud). Mutations in any of these four genes reduce or eliminate the function of the protein complex, preventing the normal breakdown of leucine, isoleucine, and valine (http://ghr.nlm.nih.gov/condition/maple-syrup-urine-disease).	in plasma increased levels of allo-isoleucine,ile,leu and val.in urine-abonormal metabolites like methylvaleric acid,hydroxyisocaproic acid,ile etc.Fecl3-green	amino acid	leu-80-200micromol/l, ile-40-90micromol/l,val-200-425micromol/l(john fernandes-inborn metabolic diseases-4th edition)	1 in 185,000 infants worldwide.	amino acid mixture hemofiltration/hemodialysis/peritonealdialysis low branched-chain aminoacid diet vitamin B1 (thiamine)	diet	strict genotype-phenotype correlations are not easily defined for MSUD [Childs 1999].	PMID:16770930,
Tetrahydrobiopterin deficiency	Tetrahydrobiopterin metabolism	Tetrahydrobiopterin metabolism	GCH1 or PCBD1 or PTS or QDPR	GCH1, PCBD1, PTS, QDPR	2643, 5092, 5805, 5860	4	GTPCI, GTPCIn,THBPT4ACAMDASE,PTHPS,PTHPSn,DHPR	6	6	autosomal recessive	autosomal recessive		nervous system	brain	OMIM:261640, Kaufman et al. (1975) demonstrated absence of dihydropteridine reductase in liver, brain, and cultured skin fibroblasts of a patient with elevated blood phenylalanine and no response to diet despite good control of blood levels.-OMIM:261630. Tetrahydrobiopterin deficiency can be caused by mutations in one of several genes, including GCH1, PCBD1, PTS, and QDPR. These genes provide ins…	in plasma-elevated phenylalanine. In urine-increased biopterin,neopterin and primapterin.	amino acid	plasma- phe(38.00-137.00 µmol/l), metabolic information centre	1 per million newborns	tetrahydrobiopterin-7-10mg/kg/d has been used for a few months.phenylalanine controlled diets.	diet	ORPHA238583 (orpha.net)	PMID: 10727395, http://www.orpha.net/data/patho/GB/uk-pcd.pdf
Mitochondrial neurogastrointestinal encephalopathy (MNGIE) disease	nucleotide metabolism	nucleotide metabolism	TYMP	TYMP	1890	1	TMDPP	1	1	autosomal recessive	autosomal recessive		nervous system, eye, digestive system	nervous system, eyes, digestive system		increase in plasma thymidine concentration greater than 3 µmol/L and increase in plasma deoxyuridine concentration greater than 5 µmol/L. Thymidine phosphorylase enzyme activity in leukocytes is less than 10% of the control mean.	enzyme		About 70 people with this disorder have been reported	supportive/symptomatic therapy	no treatment		http://www.ncbi.nlm.nih.gov/books/NBK1179/
purine nucleoside phosphorylase deficiency	nucleotide metabolism	nucleotide metabolism	PNP	PNP	4860	1	DURIPP, NP1, PNP, PUNP1, PUNP2, PUNP3, PUNP4, PUNP5, PUNP6, PUNP7	10	10	autosomal recessive	autosomal recessive		nervous system, immune system	immune system, nervous system		decresed PNP activity	enzyme					OMIM:613179
Phospholipase A2, group IV A, deficiency	phospholipid metabolism	lipid metabolism	PLA2G4A	PLA2G4A	5321	1	LPASE	1	1													OMIM:600522
keratosis follicularis spinulosa decalvans (KFSD)	polyamine metabolism	amino acid metabolism	SAT1	SAT1	6303	1	PTRCAT1	1	1	X linked or autosomal dominant	X-linked or autosomal dominant		skin, eye	skin, eye		overexpression of SAT1 and the consequent putrescine accumulation	gene analysis					OMIM:308800
autosomal dominant hypercarotenemia and vitamin A deficiency	vitamin disorder	vitamin metabolism	BCMO1	BCMO1	53630	1	BCDO	1	1	autosomal recessive or autosomal dominant	autosomal recessive or autosomal dominant					low level of serum vitamin A and a raised level of carotenes.	vitamin					OMIM:115300, OMIM:277350
urocanic aciduria	Histidine Metabolism	amino acid metabolism	UROC1	UROC1	131669	1	URCN	1	1				nervous system	nervous system		absence of enzyme	enzyme					OMIM.276880
transaldolase deficiency	HMP shunt pathway	carbohydrate metabolism	TALDO1	TALDO1	6888	1	TALA	1	1				heart, liver, spleen, kidney	heart, liver, spleen, kidney		In blood- decreased Thrombocytes, Platelets. In plasma and urine- increased D-Arabitol , Erythritol, Ribitol. In serum- decreased total protein.	carbohydrate		7 patients have been diagnosed.			OMIM: 606003	PMID: 18987987
Lathosterolosis	Cholesterol Metabolism	lipid metabolism	SC5DL	SC5DL	6309	1	LSTO1r, LSTO2r	2	2				nervous system, liver	nervous system, liver		Activity of 3-beta-hydroxysteroid-delta-5-desaturase (SC5D), the enzyme involved in this reaction, was deficient in the patient's fibroblasts.	enzyme					OMIM: 607330	PMCID: PMC378549
desmosterolosis	Cholesterol Metabolism	lipid metabolism	DHCR24	DHCR24	1718	1	DHCR241r, DHCR242r, DHCR243r	3	3	autosomal recessive	autosomal recessive		nervous system	nervous system		increased Desmosterol in plasma	cholesterol					OMIM: 602398	PMID: 12457401
Conradi-Hunermann syndrome	cholesterol Metabolism	lipid metabolism	EBP	EBP	10682	1	EBP1r, EBP2r	2	2	X-linked dominant	X-linked		skeletal system	skeletal system		In plasma- increased levels of 8-dehydrocholesterol and 8(9)-cholestenol	cholesterol					OMIM: 302960	PMID: 18176751
oxysterol 7-alphahydroxylase deficiency	Cholesterol Metabolism	lipid metabolism	CYP39A1	CYP39A1	51302	1	P45039A1r	1	1														http://books.google.com/books?id=lo4IurHUYWcC&lpg=PA39&dq=Advanced%20nutrition%20and%20human%20metabolism&pg=PA283#v=onepage&q&f=false
Progressive familial intrahepatic cholestasis (PFIC)	transport of bile salts	transporter defect	ABCB11 and ABCB4	ABCB11, ABCB4	8647, 5244	2	CHOLATEt3, GCHOLAt3, TCHOLAt3, PCt	4	4	autosomal recessive	autosomal recessive	There are three known types of PFIC: PFIC1, PFIC2, and PFIC3.	liver, spleen	liver, spleen		Low-to-normal serum γ-GT activity despite conjugated hyperbilirubinemia is the hallmark of PFIC1 and PFIC2, as γ-GT activity is elevated in most types of cholestasis. Serum cholesterol concentration is low to normal. Serum concentration of total bile acids is elevated. Fast-atom bombardment ionization mass spectrometry (FAB-MS) analysis of urine shows normal bile acid species and indicates normal…	enzyme		1 in 50,000 to 100,000 people worldwide	Nutritional therapy includes infant formulas with significant proportions of medium chain triglycerides, which can be absorbed relatively independent of bile flow. Fat-soluble vitamin supplementation using special preparations of vitamin E is useful in severe cholestasis.	diet		http://www.ncbi.nlm.nih.gov/books/NBK1297/
3beta-hydroxy-Delta(5)-C(27)-steroid oxidoreductase defect	bile acid metabolism	bile acid metabolism	HSD3B7	HSD3B7	80270	1	HSD3B7, HSD3B7P	2	2														PMCID: PMC329841
adenylosuccinase deficiency	AMP biosynthesis	nucleotide metabolism	ADSL	ADSL	158	1	ADSL1, ADSL2	2	2	autosomal recessive	autosomal recessive		nervous system	nervous system		specific test for succinyladenosine in the urine, modified Bratton-Marshall test, originally designed as an assay for sulfonamides, would be a practical screening method for the disorder, provided the patients are not receiving sulfonamides. This disorder is characterized by the presence in urine and cerebrospinal fluid of succinyl-5-amino-4-imidazolecarboxamide riboside (SAICA-riboside) and succ…	N-base						OMIM:103050, PMID:16839792, PMID: 20933180
dicarboxylic aminoaciduria	transporter defect	transporter defect	SLC1A1	SLC1A1	6505	1	ASPDt6, ASPt6, GLUt6	3	1	autosomal recessive	autosomal recessive		nervous system	nervous system	hypoglycemia is general feature	large amounts of aspartic acid and glutamic acid in urine	amino acid		1 in 36,000 births			some cases have been reported without any neurologic symptoms.	PMID: 21123949, OMIM: 222730
ichthyosis prematurity syndrome (IPS)	transporter defect	lipid metabolism	SLC27A4	SLC27A4	10999	1	DOCO13EFATP, OCT11EFATP, FATP1t	3	1	autosomal recessive	autosomal recessive		skin, respiratory system	skin, respiratory system									OMIM:608649
