# Supplementary material for: A compendium of inborn errors of metabolism mapped onto the human metabolic network
Source: Royal Society of Chemistry journal article supplement (doi:10.1039/c2mb25075f), 2012-05-02
Supplement: c2mb25075f_2.xlsx [file c2mb25075f_2.xlsx]

## Sheet: future iems supplement table 3
Unmapped IEMs	AFFECTED GENES MISSING IN RECON1	EntrezGeneID	remarks with respect to the presence in Recon 1	AFFECTED PROTEIN/ENZYME	category of disorder(metabolic pathway involved).	categorization of pathways(collagen,hemoglobin and other protein metabolism is taken under amino acid metabolism)	regulatory pathway involved.	some details about the disorder	referances
Hereditary folate malabsorption	SLC46A1	113235	present in Recon 1 as MGC9564 gene that encodes PHEMEt rxn. However there is no rxn in Recon 1 that is encoded by this gene and associated with folate transport.	proton-coupled folate transporter (PCFT).	transporter defect.	transporter defect		Approximately 15 affected families have been reported worldwide. Affects RBC,WBC, platelets and nervous system. (http://ghr.nlm.nih.gov/condition/hereditary-folate-malabsorption)	http://www.ncbi.nlm.nih.gov/bookshelf/br.fcgi?book=gene&part=folate-mal
Mitochondrial encephalomyopathy, lactic acidosis, and stroke-like episodes (MELAS)	MT-ND1, MT-ND5, MT-TH, MT-TL1, and MT-TV		Recon 1 contains 2 genes, i.e. the gene MT-ND1 that encodes NADH2-u10m rxn and MT-ND5 that encodes NADH2-u10m rxn. Other genes are missing.	proteins are part of a large enzyme complex in mitochondria that helps convert oxygen and simple sugars to energy. Other genes associated with this disorder provide instructions for making molecules called transfer RNAs.	respiratory chain is primarily affected .(PMID: 20065125)	ETC		most common MELAS have an incidence of 7.59 per 100,000 persons in north east England,16.3 persons per 100,000 in north Finland, 236 per 100,000 in Australia. Organs affected are CNS, peripheral nervous system, ear, eye, heart, kidney, GI system and endocrine system.(PMID: 20065125)	http://www.ncbi.nlm.nih.gov/bookshelf/br.fcgi?book=gene&part=melas, PMID: 20065125
Ehlers-Danlos syndrome	ADAMTS2, COL1A1, COL1A2, COL3A1, COL5A1, COL5A2, PLOD1, and TNXB	9509, 1277, 1278, 1281, 1289, 1290, 5351 and 7148	Recon 1 contains the PLOD 1 gene that encodes the rxn PCLYSOX, however other genes are missing.	genes (COL1A1, COL1A2, COL3A1, COL5A1, and COL5A2) provide instructions for making proteins that are used to assemble different types of collagen. Collagens are molecules that give structure and strength to connective tissues throughout the body. Other genes (ADAMTS2, PLOD1, and TNXB) provide instructions for making proteins that process or interact with collagen.	collagen metabolism	amino acid metabolism			http://ghr.nlm.nih.gov/condition/ehlers-danlos-syndrome
2-hydroxyglutaric aciduria	D2HGDH and L2HGDH	728294 and 79944		D-2-hydroxyglutarate dehydrogenase	succinic acid-glycine cycle.(PMID: 16601864)	amino acid metabolism		Worldwide, about 100 cases of L-2-hydroxyglutaric aciduria have been reported, and about 75 cases of D-2-hydroxyglutaric aciduria have been described. D-2-hydroxyglutaric aciduria mainly affects cerebrum and L-2-hydroxyglutaric aciduria affects cerebellum.	PMID: 20065797, PMID: 18931888, OMIM:236792 and OMIM:600721, http://ghr.nlm.nih.gov/condition=2-hydroxyglutaric-aciduria
3-methylglutaconic aciduria type II (Barth syndrome)	TAZ	6901		tafazzin-maintains the levels of a particular lipid, cardiolipin, located in the inner membrane of the mitochondria.	cardiolipin metabolism.	lipid metabolism		affects cardio-skeletal system(PMID: 16899548)	PMID: 16442164 ,
3-methylglutaconic aciduria type III	OPA3	80207		mitochondrial protein	The branched-chain organic acid 3-MGC is an intermediate of leucine degradation pathway and the mevalonate shunt pathway that links sterol synthesis with mitochondrial acetyl-CoA metabolism.	amino acid metabolism		characterized by Bilateral early-onset optic atrophy and Choreoathetoid movement disorder.The diagnosis of 3-MGCA 3 is suggested by elevated urinary excretion of 3-methylglutaconate (3-MGC) and 3-methylglutaric acid (3-MGA) and confirmed by molecular genetic testing of OPA3 gene.	http://www.ncbi.nlm.nih.gov/bookshelf/br.fcgi?book=gene&part=mga3#mga3.Elevated_Excretion_o
3-methylglutaconic aciduria type V	DNAJC19	131118		ATP-dependent transport of transit peptide-containing proteins.		regulatory pathway	defect in post-transcriptional splicing of DNAJC19 gene, so the product of the gene localizes to the cardiac mitochondria.(doi:10.1017/S104795110700042)	It has been reported only in the genetically isolated Hutterite population of Canada and the Northern United States. The common link among all types of 3-methylglutaconic aciduria is the excretion of large amounts of 3-methylglutaconic acid and 3-methylglutaric acid in the urine.	PMID: 17244376, http://ghr.nlm.nih.gov/condition/3-methylglutaconic-aciduria
Abetalipoproteinemia	MTTP	4547		microsomal triglyceride transfer protein	lipoprotein metabolism.	lipid metabolism		in the absence of microsomal triglyceride transfer protein, apoB undergoes pre-secretory degradation preventing the assembly of chylomicrons and VLDL.(Uslu, N., Gürakan, F., Yüce, , Demir, H., & Tarugi, P.. (2010). Abetalipoproteinemia in an infant with severe clinical phenotype and a novel mutation. The Turkish Journal of Pediatrics, 52(1), 73-7. Retrieved November 12, 2010, from Research Librar…	Atherosclerosis Supplements, doi:10.1016/S1567-5688(10)70383-4, Volume 11, Issue 2, June 2010, Page 84 Abstracts of the 78th EAS Congress, (http://ghr.nlm.nih.gov/condition/abetalipoproteinemia), PMID: 10891663
Friedreich ataxia	FXN	2395		frataxin		regulatory pathway	deficiency of FXN gene transcription, results in deficiency of frataxin, which is essential for iron-sulfur cluster biogenesis, resulting in mitochondrial dysfunction.(PMID: 19956589)	electron transport chain is affected, reduced energy production.(PMID: 19165552 )	Title: Epigenetic Silencing in Friedreich Ataxia Is Associated with Depletion of CTCF (CCCTC-Binding Factor) and Antisense Transcription Author(s): De Biase I, Chutake YK, Rindler PM, et al. Source: PLOS ONE Volume: 4 Issue: 11 Article Number: e7914 Published: NOV 19 2009 (PMID: 19956589)
Cholesteryl ester storage disease	LIPA	3988		lysosomal acid lipase	lipid metaboilsm.(cholesterol ester)	lipid metabolism		About 50 individuals affected by this condition have been reported worldwide.liver and heart are primarily affected.(http://ghr.nlm.nih.gov/condition/cholesteryl-ester-storage-disease)	PMID: 19307143
Chylomicron retention disease	SAR1B	51128		protein that is involved in transporting chylomicrons within enterocytes	lipid metabolism	lipid metabolism		Chylomicron retention disease is a rare condition with approximately 40 cases described worldwide.affects the nervous system in the later stage.(http://ghr.nlm.nih.gov/condition/chylomicron-retention-disease)	Journal of Pediatric Gastroenterology & Nutrition. 48(3):370-373, March 2009./Novel Missense Mutations of SAR1B Gene in an Infant With Chylomicron Retention Disease Treepongkaruna, Suporn; Chongviriyaphan, Nalinee; Suthutvoravut, Umaporn; Charoenpipop, Dussadee; Choubtum, Lulin; Wattanasirichaigoon, Duangrurdee Journal of Pediatric Gastroenterology & Nutrition. 48(3):370-373, March 2009. doi: 10.…
Cystinosis	CTNS	1497		cystinosin- moves cystine out of the lysosomes	amino acid cysteine metabolism	amino acid metabolism		Cystinosis affects approximately 1 in 100,000 to 200,000 newborns. The incidence is higher in the province of Brittany, France, where the disorder affects 1 in 26,000 individuals.primarily affects kidneys and eyes.(http://ghr.nlm.nih.gov/condition/cystinosis)	PMID: 20467383
Cytochrome P450 oxidoreductase deficiency	POR	5447		cytochrome P450 oxidoreductase, which plays a critical role in the formation of steroid hormones.	steroid hormone metabolism	hormone metabolism		About 60 affected individuals have been reported worldwide. reproductive and skeletal system affected .(http://ghr.nlm.nih.gov/condition/cytochrome-p450-oxidoreductase-deficiency)	PMID: 20844025
Dubin-Johnson syndrome	ABCC2	1244		multidrug resistance protein 2 (MRP2)- This protein acts as a pump to transport substances out of the liver, kidneys, intestine, or placenta so they can be excreted from the body.	transporter defect/bile acid metabolism	transporter defect		Studies suggest that this disorder affects 1 in 1,300 Iranian Jews in Israel.Jaundice is typically the only symptom of Dubin-Johnson syndrome, but some people also experience weakness, mild upper abdominal pain, nausea, and/or vomiting.(http://ghr.nlm.nih.gov/condition/dubin-johnson-syndrome)	PMID: 19881259
Donnai-Barrow syndrome	LRP2	4036		Megalin- has many ligands involved in various body processes, including the absorption of vitamins A and D, immune functioning, stress response, and the transport of fats in the bloodstream.		regulatory pathway		. The LRP2 gene provides instructions for making a protein called megalin, which functions as a receptor. Receptor proteins have specific sites into which certain other proteins, called ligands, fit like keys into locks. Together, ligands and their receptors trigger signals that affect cell development and function.Megalin is embedded in the membrane of cells that line the surfaces and cavities o…	http://www.ncbi.nlm.nih.gov/bookshelf/br.fcgi?book=gene&part=donnai, PMID: 19089858
GM2-gangliosidosis, AB variant	GM2A	2760		GM2 ganglioside activator- required for the normal function of an enzyme called beta-hexosaminidase A.	glycosphingolipid metabolism(GM2)	lipid metabolism		GM2-gangliosidosis, AB variant is a rare inherited disorder that progressively destroys nerve cells (neurons) in the brain and spinal cord.This condition is inherited in an autosomal recessive pattern.(http://ghr.nlm.nih.gov/condition/gm2-gangliosidosis-ab-variant)	PMID: 11339652,Biochimica et Biophysica Acta (BBA) - Molecular Basis of Disease,doi:10.1016/S0925-4439(99)00074-5 Volume 1455, Issues 2-3, 8 October 1999, Pages 105-138,
Hemochromatosis	HAMP, HFE, HFE2, SLC40A1, and TFR2	57817, 3077, 148738, 30061 and 7036		regulates the absorption, transport, and storage of iron.	iron metabolism	mineral metabolism		Mutations in these genes impair the control of iron absorption during digestion and alter the distribution of iron to other parts of the body. As a result, iron accumulates in tissues and organs, which can disrupt their normal functions.Type 1 hemochromatosis is one of the most common genetic disorders in the United States, affecting about 1 million people. It most often affects people of Norther…	PMID: 20843199,PMID: 17951290
Juvenile Batten disease	CLN3	1201		mutation in CLN3 leads to builds up of a fatty substance called a lipopigmen abnormally within lysosomes.	lysosomal storage disease(characterized by intracellular accumulation of autofluorescent liposomal material). (http://www.uniprot.org/uniprot/Q13286)	lipid metabolism		affects nervous system and eye.(http://www.ncbi.nlm.nih.gov/bookshelf/br.fcgi?book=gene&part=ncl#ncl.Clinical_Description) , neuronal ceroid lipofuscinoses 3 is especially enriched in Finland with an incidence of 1:21,000 live births and a carrier frequency of 1 in 70 (Mitchison et al., 1995).-OMIM:204200	DOI: 10.1111/j.1469-8749.2010.03628.x, Developmental Medicine & Child Neurology Volume 52, Issue 7, pages 637–643, July 2010
Kufs disease	PPT1	5538		palmitoyl-protein thioesterase 1	lysosomal storage disease	lipid metabolism		the protein removes thioester-linked fatty acyl groups such as palmitate from modified cysteine residues in proteins or peptides during lysosomal degradation. Prefers acyl chain lengths of 14 to 18 carbons.(http://www.uniprot.org/uniprot/P50897). the disease primarily affects the nervous system, as a group, NCLs affect 2 to 4 per 100,000 newborns worldwide. It is estimated that Kufs disease repre…	PMID: 20680390
Lactose intolerance in adulthood	LCT and MCM6	3938 and 4175		The LCT gene provides instructions for making the lactase enzyme. LCT gene expression is controlled by a DNA sequence called a regulatory element, which is located within a nearby gene called MCM6.	carbohydrate metabolism disorder.	carbohydrate metabolism		Approximately 65 percent of the human population has a reduced ability to digest lactose after infancy. Lactose intolerance in adulthood is most prevalent in people of East Asian descent, affecting more than 90 percent of adults in some of these communities. Lactose intolerance is also very common in people of West African, Arab, Jewish, Greek, and Italian descent.(http://ghr.nlm.nih.gov/conditio…	Annals of Medicine,2005, Vol. 37, No. 3 , Pages 179-185 (doi:10.1080/07853890510007359)
Menkes syndrome	ATP7A	538		protein that is important for regulating copper levels in the body.	copper metabolism	mineral metabolism		This gene encodes a transmembrane protein that functions in copper transport across membranes. The protein localizes to the trans-Golgi network, where it is predicted to supply copper to copper-dependent enzymes in the secretory pathway. The protein relocalizes to the plasma membrane under conditions of elevated extracellular copper and functions in the efflux of copper from cells.(Gene ID: 538).…	PMID: 20420124, http://www.ncbi.nlm.nih.gov/bookshelf/br.fcgi?book=gene&part=menkes
Metachromatic leukodystrophy	ARSA and PSAP	410 and 5660		prosaposin- activator proteins that assist enzymes in breaking up various sphingolipids. The saposin B protein is the activator that works with the enzyme arylsulfatase A to break down sulfatides. Mutations in the PSAP gene that result in a shortage (deficiency) of the saposin B protein interfere with its role in sulfatide metabolism, resulting in the accumulation of sulfatides characteristic of …	lysosomal disorder/sphingolipid metabolism	lipid metabolism		found in turkish and spanish ancestory(OMIM:249900).	http://www.ncbi.nlm.nih.gov/bookshelf/br.fcgi?book=gene&part=mld
Mucolipidosis II alpha/beta (also known as I-cell disease)	GNPTAB	79158		GlcNAc-1-phosphotransferase	lysosomal storage disorder. (absence of glycosylation by mannose-6-phosphate)	carbohydrate metabolism		It is estimated to occur in about 1 in 100,000 to 400,000 individuals worldwide. Affects musculo-skeletal system and nervous system.(http://ghr.nlm.nih.gov/condition/mucolipidosis-ii-alphabeta)	http://www.ncbi.nlm.nih.gov/bookshelf/br.fcgi?book=gene&part=ml2
Mucolipidosis III gamma	GNPTG	84572		subunit of an enzyme called GlcNAc-1-phosphotransferase.	lysosomal storage disorder. (absence of glycosylation by mannose-6-phosphate	carbohydrate metabolism		It is estimated to occur in about 1 in 100,000 to 400,000 individuals worldwide. Affects musculo-skeletal system, nervoys system and eye. (http://ghr.nlm.nih.gov/condition/mucolipidosis-iii-gamma)	http://www.ncbi.nlm.nih.gov/bookshelf/br.fcgi?book=gene&part=ml3c
Mucolipidosis type IV	MCOLN1	57192		mucolipin-1- This protein is located in the membranes of lysosomes and endosomes, compartments within the cell that digest and recycle materials.	lysosomal storage disorder/ transporter defect (the encoded protein is a cation channel probably playing a role in the endocytic pathway and in the control of membrane trafficking of proteins and lipids. Could play a major role in Ca2+ transport regulating lysosomal exocytosis) (http://www.uniprot.org/uniprot/Q9GZU1)	transporter defect		Mucolipidosis type IV is estimated to occur in 1 in 40,000 people. About 70 percent of affected individuals have Ashkenazi Jewish ancestry. Affected organs are nervous system, eye, muscles and stomach. (http://ghr.nlm.nih.gov/condition/mucolipidosis-type-iv)	http://www.ncbi.nlm.nih.gov/bookshelf/br.fcgi?book=gene&part=ml4
mucopolysaccharidosis type III C	HGSNAT	138050		enzymes are involved in the step-wise breakdown of a subset of GAGs called heparan sulfate.	lysosomal storage disease (carbohydrate disorder)	carbohydrate metabolism		The birth prevalence of MPS IIIC in Australia, Portugal, and the Netherlands has been estimated at 0.07, 0.12, and 0.21 per 100,000, respectively (Feldhammer et al., 2009). Affects nervous system and motor skills.(OMIM:252930)	http://mps.csupportinc.com/files/booklet_MPS_III_v6.pdf, PMID: 19479962
Neutral lipid storage disease	PNPLA2	57104		adipose triglyceride lipase (ATGL)	lipid disorder, (breakdown of triglyceride pathway)	lipid metabolism		incidence is unknown and affects muscles,heart, pancreas, thyroid glands and may lead to type 2 diabetes mellitus. (http://ghr.nlm.nih.gov/condition/neutral-lipid-storage-disease-with-myopathy)	doi:10.1016/j.nmd.2010.04.004
Niemann-Pick disease	NPC1, NPC2, and SMPD1	4864, 10577 and 6609		Mutations in the SMPD1 gene cause Niemann-Pick disease types A and B. This gene provides instructions for producing an enzyme called acid sphingomyelinase. Mutations in either the NPC1 or NPC2 gene cause Niemann-Pick disease type C. The NPC1 gene provides instructions for producing a protein that is involved in the movement of cholesterol and lipids within cells. A deficiency of this protein lead…	lysosomal storage disorder. (lipid metabolism)	lipid metabolism		The incidence of both Niemann-Pick disease types A and B in all other populations is estimated to be 1 in 250,000. The incidence of Niemann-Pick disease type C is estimated to be 1 in 150,000. organs affected are spleen, liver, lungs, bone marrow, and brain. (http://ghr.nlm.nih.gov/condition/niemann-pick-disease)	http://www.ncbi.nlm.nih.gov/bookshelf/br.fcgi?book=gene&part=npab, http://www.ncbi.nlm.nih.gov/bookshelf/br.fcgi?book=gene&part=npc
Ocular albinism	GPR143	4935		the encoded protein functions as intracellular G protein-coupled receptor involved in melanosome biogenesis, organization and transport. plays a role in pigmentation of the eyes and skin. It helps control the growth of melanosomes.		regulatory pathway	melanosome biogenesis	The most common form of this disorder, ocular albinism type 1, affects at least 1 in 60,000 males. The classic signs and symptoms of this condition are much less common in females, inherited in an X-linked pattern. Affected organs are eyes and optic nerves. (http://ghr.nlm.nih.gov/condition/ocular-albinism)	http://www.ncbi.nlm.nih.gov/bookshelf/br.fcgi?book=gene&part=x-oa
Oculocutaneous albinism	OCA2, SLC45A2, TYR, and TYRP1	4948, 51151, 7299 and 7306		pigment called melanin.	amino acid metabolism.(tyrosine to melanin pathway)	amino acid metabolism		TYR gene encodes enzyme that catalyzes the first 2 steps, and at least 1 subsequent step, in the conversion of tyrosine to melanin. The enzyme has both tyrosine hydroxylase and dopa oxidase catalytic activities, and requires copper for function.(Gene ID: 7299) OCA2 gene encodes protein that is an integral membrane protein involved in small molecule transport, specifically tyrosine - a precursor o…	http://www.ncbi.nlm.nih.gov/bookshelf/br.fcgi?book=gene&part=oca1, http://www.ncbi.nlm.nih.gov/bookshelf/br.fcgi?book=gene&part=oca2, http://www.ncbi.nlm.nih.gov/bookshelf/br.fcgi?book=gene&part=oca4
Rhizomelic chondrodysplasia punctata type 1	PEX7, GNPAT, and AGPS	5191, 8443 and 8540		the encoded protein binds to the N-terminal PTS2-type peroxisomal targeting signal and plays an essential role in peroxisomal protein import. (http://www.uniprot.org/uniprot/O00628)		regulatory pathway	peroxisome biogenesis pathway	Rhizomelic chondrodysplasia punctata affects fewer than 1 in 100,000 people worldwide. Affects skeletal system, respiratory system, and nervous system. (http://ghr.nlm.nih.gov/condition/rhizomelic-chondrodysplasia-punctata)	http://www.ncbi.nlm.nih.gov/bookshelf/br.fcgi?book=gene&part=rcdp
Very long-chain acyl-coenzyme A dehydrogenase (VLCAD) deficiency	ACADVL	37		very long-chain acyl-coenzyme A dehydrogenase	lipid metabolism.(fatty acid beta oxidation in mitochondria)	lipid metabolism		VLCAD deficiency is estimated to affect 1 in 40,000 to 120,000 people. Affects muscles, liver and heart. When symptoms begin in adolescence or adulthood, they tend to be milder and usually do not involve the heart. (http://ghr.nlm.nih.gov/condition/very-long-chain-acyl-coenzyme-a-dehydrogenase-deficiency)	http://www.ncbi.nlm.nih.gov/bookshelf/br.fcgi?book=gene&part=vlcad
Wilson disease	ATP7B and PRNP	540 and 5621		ATP7B gene provides instructions for making a protein that plays a role in the transport of copper from the liver to other parts of the body.A normal variation in the PRNP gene may delay the age of onset of Wilson disease and affect the type of symptoms that develop. The PRNP gene provides instructions for making prion protein, which is active in the brain and other tissues.	copper metabolism/transporter defect	mineral metabolism		Wilson disease is a rare disorder that affects approximately 1 in 30,000 individuals. Affected organs are liver, brain, and eyes. (http://ghr.nlm.nih.gov/condition/wilson-disease)	http://www.ncbi.nlm.nih.gov/bookshelf/br.fcgi?book=gene&part=wilson
Wolman disease	LIPA	3988		lysosomal acid lipase.	lipid metabolism. (triglycerides and cholesteryl esters hydrolysis pathways)	lipid metabolism		Wolman disease is estimated to occur in 1 in 350,000 newborns. Affected organs are spleen, liver, bone marrow, small intestine, small hormone-producing glands on top of each kidney (adrenal glands), and lymph nodes. (http://ghr.nlm.nih.gov/condition/wolman-disease)	PMID: 17455094
X-linked adrenoleukodystrophy	ABCD1	215		adrenoleukodystrophy protein (ALDP), which is involved in transporting molecules into peroxisomes.	lipid metabolism (very long-chain fatty acids beta oxidation in peroxisomes)	lipid metabolism		The prevalence of X-linked adrenoleukodystrophy is approximately 1 in 20,000 individuals worldwide.It mainly affects the nervous system and the adrenal glands. (http://ghr.nlm.nih.gov/condition/x-linked-adrenoleukodystrophy)	http://www.ncbi.nlm.nih.gov/bookshelf/br.fcgi?book=gene&part=x-ald
Peroxisome biogenesis disorders, Zellweger syndrome spectrum	PEX1 and 11 other PEX genes.			Peroxins-assist in the formation (biogenesis) of peroxisomes by producing the membrane that separates the peroxisome from the rest of the cell and by importing enzymes into the peroxisome.		regulatory pathway	peroxisome biogenesis. (disrupt the formation of peroxisomes)	The Zellweger spectrum is estimated to occur in 1 in 50,000 individuals. Affects white matter(brain and spinal cord), liver, heart, and kidneys. (http://ghr.nlm.nih.gov/condition/zellweger-spectrum).	http://www.ncbi.nlm.nih.gov/bookshelf/br.fcgi?book=gene&part=pbd
Brugada syndrome type 2 (BRS2) and sudden infant death syndrome (SIDS)	GPD1L	23171		catalyzes the conversion of sn-glycerol 3-phosphate to glycerone phosphate. Glycerol phosphate dehydrogenase action.		regulatory pathway	the GPD1L-dependent SCN5A phosphorylation pathway may be a general regulatory mechanism linking the metabolic state of the cardiocyte to cellular excitability by modulating INa density.(PMID: 19666841)	affects the heart. (OMIM:611777)	PMID: 17967976
Transthyretin amyloidos	TTR	7276		Transthyretin transports vitamin A (retinol) and the hormone thyroxine throughout the body.		hormone metabolism	defctive binding of transthyretin molecules, 4 must bind to serve as an effective transporter of retinol and thyroxine.	Transthyretin amyloidosis is less common among Americans of European descent, where it is estimated to affect one in 100,000 people. Affects the peripheral nervous system.(http://ghr.nlm.nih.gov/condition/transthyretin-amyloidosis)	http://www.ncbi.nlm.nih.gov/bookshelf/br.fcgi?book=gene&part=tfap
Familial hyperinsulinism (FHI)	ABCC8, KCNJ11, GLUD1, GCK, and HADH	6833, 3767, 2746, 2645 and 3033		ABCC8 gene encodes protein functioning as a modulator of ATP-sensitive potassium channels and insulin release. KCNJ11 gene encodes integral membrane protein and inward-rectifier type potassium channel. The encoded protein, which has a greater tendency to allow potassium to flow into a cell rather than out of a cell, is controlled by G-proteins and is found associated with the sulfonylurea recepto…	ABC transporter/potassium channel inward rectifier/ short or medium chain acylcoa dehydrogenase deficiency	transporter defect		Familial hyperinsulinism has an estimated incidence of 1 in 50,000 live births. (http://ghr.nlm.nih.gov/condition/familial-hyperinsulinism)	http://www.ncbi.nlm.nih.gov/bookshelf/br.fcgi?book=gene&part=hi
Familial hypercholesterolemia	LDLR, LDLRAP1,APOB and PCSK9	3949, 26119, 338 and 255738		LDLR gene encodes cell surface proteins involved in receptor-mediated endocytosis of specific ligands. Low density lipoprotein (LDL) is normally bound at the cell membrane and taken into the cell ending up in lysosomes where the protein is degraded and the cholesterol is made available for repression of microsomal enzyme 3-hydroxy-3-methylglutaryl coenzyme A (HMG CoA) reductase, the rate-limiting…	LDL-cholesterol, cholesterol synthesis and Apo-proteins pathway. ABC transporters(ABCG5 and ABCG8 gene encoded transporters) defects may also lead to thsi disorder.	lipid metabolism	SREBP2 mediated transcription of cholesterol synthesis genes.	orphanet database(http://www.orpha.net/consor/cgi-bin/Disease_Genes_Simple.php?lng=EN&LnkId=268&Typ=Pat&diseaseType=Gen) mentions 3 additional genes involved in familial hypercholesterolemia(SREBF2, ABCG5 and ABCG8). Affects about 1 in 500 people in most countries, occurs more frequently in certain populations, including Afrikaners in South Africa, French Canadians, Lebanese, and Finns. (http://g…	PMID: 20614444
Ethylmalonic encephalopathy	ETHE1	23474		This gene encodes a sulfur dioxygenase that localizes within the mitochondrial matrix. The enzyme functions in sulfide catabolism.		regulatory pathway	metabolic homeostasis in mitochondria	About 30 individuals with this condition have been identified worldwide, mostly in Mediterranean and Arab populations. Affects nervous system, vascular system and muscles.(http://ghr.nlm.nih.gov/condition/ethylmalonic-encephalopathy)	PMID: 19289697 , PMID: 14732903, OMIM:602473
Neuropathy, ataxia, and retinitis pigmentosa (NARP)	MT-ATP6	4508		The MT-ATP6 protein forms one part (subunit) of an enzyme called ATP synthase, which is responsible for the last step in ATP production.	electron transport chain and ATP synthesis	ETC		chiefly affects nervous system. (http://ghr.nlm.nih.gov/condition/neuropathy-ataxia-and-retinitis-pigmentosa)	http://www.ncbi.nlm.nih.gov/bookshelf/br.fcgi?book=gene&part=mt-overview, http://www.ncbi.nlm.nih.gov/bookshelf/br.fcgi?book=gene&part=narp
Primary congenital glaucoma	CYP1B1 and MYOC	1545 and 4653		myocilin. Myocilin is found in certain structures of the eye, called the trabecular meshwork and the ciliary body, that regulate the intraocular pressure.		regulatory pathway	development of the trabecular meshwork in the eye.	Primary congenital glaucoma affects approximately 1 in 10,000 people. Its frequency is higher in the Middle East. Other forms are juvenile onset and primary open-angle forms. Affects the eye and may lead to blindness. (http://ghr.nlm.nih.gov/condition/early-onset-glaucoma)	PMID: 20431268,PMID: 20057908
Trimethylaminuria	FMO3	2328		Flavin-containing monooxygenases- breaks down nitrogen-containing compounds from the diet, including trimethylamine.	xenobiotic metabolism.( trimethylamine from fish)	xenobiotic metabolism		incidence is unknown, affects the digestive system.(http://ghr.nlm.nih.gov/condition/trimethylaminuria).	http://www.ncbi.nlm.nih.gov/bookshelf/br.fcgi?book=gene&part=trimethylaminuria
methylmalonic aciduria (cobalamin deficiency) cblD type	MMADHC	27249		mitochondrial protein that is involved in an early step of vitamin B12 metabolism.	cobalamin (vit B12) metabolism	vitamin metabolism		clinically distinguished as combined and isolated forms.(OMIM:277410)	OMIM:277410, PMID: 18385497
Berardinelli-Seip congenital lipodystrophy type 2	BSCL2	26580		seipin- important for lipid droplet morphology in the ER.		regulatory pathway	development of lipid droplet morphology.(process still not known).	Berardinelli-Seip congenital lipodystrophy has an estimated prevalence of 1 in 10 million people worldwide. Affects liver,muscles, heart and nervous sytem.(http://ghr.nlm.nih.gov/condition/berardinelli-seip-congenital-lipodystrophy)	http://www.ncbi.nlm.nih.gov/bookshelf/br.fcgi?book=gene&part=bscl
rickets vitamin D-dependent type 2A (VDDR2A)	VDR	7421		nuclear hormone receptor for vitamin D3.		regulatory pathway	regulation of transcription of hormone sensitive genes via its association with the WINAC complex, a chromatin-remodeling complex. (http://www.uniprot.org/uniprot/P11473)	affects bones.	OMIM:277440, PMID: 20146166
Optic atrophy type 1	OPA1	4976		OPA1 protein plays a key role in the organization of the shape and structure of the mitochondria and in the self-destruction of cells (apoptosis). The OPA1 protein is also involved in a process called oxidative phosphorylation. Als omaintains mtDNA.		regulatory pathway	mitochondrial fusion and regulation of apoptosis. (http://www.uniprot.org/uniprot/O60313)	Optic atrophy type 1 is estimated to affect 1 in 50,000 people worldwide. This condition is more common in Denmark, where it affects approximately 1 in 10,000 people. Affects the eyes.(http://ghr.nlm.nih.gov/condition/optic-atrophy-type-1)	http://www.ncbi.nlm.nih.gov/bookshelf/br.fcgi?book=gene&part=opa
ZAP70-related severe combined immunodeficiency	ZAP70	7535		A loss of functional zeta-chain-associated protein kinase leads to the absence of CD8+ T cells and an excess of inactive CD4+ T cells. The resulting shortage of active T cells causes people with ZAP70-related SCID to be more susceptible to infection.		regulatory pathway	T-cell development and lymphocyte activation	Only about 15 affected individuals have been identified. Affects the immune system. (http://ghr.nlm.nih.gov/condition/zap70-related-severe-combined-immunodeficiency)	http://www.ncbi.nlm.nih.gov/bookshelf/br.fcgi?book=gene&part=zap70-scid
methylmalonic aciduria and homocystinuria type cblC.	MMACHC	25974		it is postulated that this protein may have a role in the binding and intracellular trafficking of cobalamin.	cobalamin metabolism	vitamin metabolism		Methylmalonic aciduria and homocystinuria, cblC type, is the most common inborn error of vitamin B12 (cobalamin) metabolism, with about 250 known cases (Lerner-Ellis et al., 2006). Affected individuals may have developmental, hematologic, neurologic, metabolic, ophthalmologic, and dermatologic clinical findings. Although considered a disease of infancy or childhood, some individuals develop sympt…	PMID: 19700356,PMID: 8534962, OMIM:277400
Wolff-Parkinson-White syndrome	PRKAG2	51422		encodes AMP-activated protein kinase (AMPK). This enzyme helps sense and respond to energy demands within cells. It is likely involved in the development of the heart before birth, although its role in this process is unknown.		regulatory pathway	AMPK is responsible for the regulation of fatty acid synthesis by phosphorylation of acetyl-CoA carboxylase. Also regulates cholesterol synthesis via phosphorylation and inactivation of hydroxymethylglutaryl-CoA reductase and hormone-sensitive lipase. This is a regulatory subunit.(http://www.uniprot.org/uniprot/Q9UGJ0)	Wolff-Parkinson-White syndrome affects 1 to 3 in 1,000 people worldwide. Only a small fraction of these cases appear to run in families. Affects the heart. (http://ghr.nlm.nih.gov/condition/wolff-parkinson-white-syndrome)	PMID: 20361420,PMID: 19465366
Congenital hypothyroidism	DUOX2, PAX8, SLC5A5, TG, TPO, TSHB, and TSHR	50506, 7849, 6528, 7038, 7173, 7252 and 7253		Mutations in the PAX8 gene and some mutations in the TSHR gene prevent or disrupt the normal development of the thyroid gland before birth. Mutations in the DUOX2, SLC5A5, TG, TPO, and TSHB genes prevent or reduce the production of thyroid hormones, even though the thyroid gland is present. PAX8 gene encodes nuclear protein is involved in thyroid follicular cell development and expression of thyr…	thyroid hormone metabolism.	hormone metabolism		Studies of populations from North America, Europe, Japan, and Australia, indicate that congenital hypothyroidism affects 1 in 3,000 to 4,000 newborns. Affects the thyroid gland, T3 and T4 hormone production is decreased or absent.(http://ghr.nlm.nih.gov/condition/congenital-hypothyroidism)	PMID: 20302910, PMID: 20153806
Inherited thyroxine-binding globulin deficiency	SERPINA7	6906		thyroxine-binding globulin	thyroid hormone transporter deficiency	hormone metabolism		The complete form of inherited thyroxine-binding globulin deficiency, TBG-CD, affects about 1 in 15,000 newborns worldwide. The partial form, TBG-PD, affects about 1 in 4,000 newborns. These conditions appear to be more common in the Australian Aborigine population and in the Bedouin population of southern Israel. (http://ghr.nlm.nih.gov/condition/inherited-thyroxine-binding-globulin-deficiency)	PMID: 19415532
obesity and pituitary dysfunction.	LEPR	3953		the gene encodes receptor for obesity factor (leptin). On ligand binding, mediates signaling through JAK2/STAT3. Involved in the regulation of fat metabolism and, in a hematopoietic pathway, required for normal lymphopoiesis. May play a role in reproduction. Can also mediate the ERK/FOS signaling pathway		regulatory pathway	leptin receptor stimulate gene transcription via activation of cytosolic STAT proteins.		PMID: 20624279
autosomal dominant hypophosphatemic rickets (ADHR)	PHEX and FGF23	5251 and 8074		Regulator of phosphate homeostasis		regulatory pathway	regulation of renal phosphate levels. PHEX gene for phosphate reabsorption and FGF23 gene inhibits phosphate transport.	X-linked hypophosphatemic rickets is the most common form of rickets that runs in families. It affects about 1 in 20,000 newborns. Affects bones, joints , tendons and ligaments. (http://ghr.nlm.nih.gov/condition/hereditary-hypophosphatemic-rickets)	PMID: 20688626
obesity in middle age.	PPARGC1B	133522		The encoded protein may be involved in fat oxidation, non-oxidative glucose metabolism, and the regulation of energy expenditure.		regulatory pathway	transcription activation.		PMID: 11916956
surfactant protein B deficiency/pulmonary alveolar proteinosis	SFTPB	6439		This gene encodes the pulmonary-associated surfactant protein B (SPB), an amphipathic surfactant protein essential for lung function and homeostasis after birth.		regulatory pathway	promotes alveolar stability	affects lungs	PMID: 20005435, OMIM:265120
multiple lipid transport defects	NPC1L1	29881		Play a major role in cholesterol homeostasis. Is critical for the uptake of cholesterol across the plasma membrane of the intestinal enterocyte	cholesterol transport , other multiple lipids and vit E.	lipid metabolism		affects the heart in the elderly.	PMID: 19752398
pulmonary surfactant metabolism dysfunction type 2	SFTPC	6440		This gene encodes the pulmonary-associated surfactant protein C (SPC), an extremely hydrophobic surfactant protein essential for lung function and homeostasis after birth.	lipoprotein metabolism.	lipid metabolism		affects the lungs.	PMID: 19220077
Hyperapobetalipoproteinemia	PPARA	5465		Ligand-activated transcription factor. Key regulator of lipid metabolism		regulatory pathway	Regulates the peroxisomal beta-oxidation pathway of fatty acids. Functions as transcription activator for the acyl-CoA oxidase gene. (http://www.uniprot.org/uniprot/Q07869)		PMID: 10828087,PMID: 17705849, OMIM:170998
insulin resistance and various other metabolic disorders	ANGPTL2	23452		The encoded protein is a serum hormone directly involved in regulating glucose homeostasis, lipid metabolism, and insulin sensitivity and also acts as an apoptosis survival factor for vascular endothelial cells.		regulatory pathway	Induces sprouting in endothelial cells through an autocrine and paracrine action.(http://www.uniprot.org/uniprot/Q9UKU9)		PMID: 19723494,http://www.vincibiochem.it/PDFFiles/ANGPTLs.pdf
Ataxia with vitamin E deficiency	TTPA	7274		α-tocopherol transfer protein (αTTP)	transport and distribution of vit E in the body.	vitamin metabolism		affects the nervous system. (http://ghr.nlm.nih.gov/condition/ataxia-with-vitamin-e-deficiency)	http://www.ncbi.nlm.nih.gov/bookshelf/br.fcgi?book=gene&part=aved
apolipoprotein A-II deficiency or hypercholesterolemia	APOA2	336		apolipoprotein (apo-) A-II, which is the second most abundant protein of the high density lipoprotein particles.	HDL metabolism.(apo-lipoprotein A II)	lipid metabolism		In most populations the frequency of the homozygote is 1 in a million (probably a minimal estimate, being a prevalence figure rather than incidence at birth) and the frequency of heterozygotes not less than 1 in 500. mainly affects the heart.	PMID: 19910634, OMIM:143890
Prolidase deficiency	PEPD	5184		the protein forms a homodimer that hydrolyzes dipeptides or tripeptides with C-terminal proline or hydroxyproline residues. The enzyme serves an important role in the recycling of proline	collagen metabolism. (cleaves the dipeptides a prolyl or hydroxyprolyl residue in the C-terminal position)	amino acid metabolism		affects the respiratory system, may lead to systemic lupus erythomatoses.	PMID: 17142620, OMIM:170100
combined deficiency of vitamin K-dependent clotting factors type 2 (VKCFD2)	VKORC1	79001		Involved in vitamin K metabolism. Catalytic subunit of the vitamin K epoxide reductase (VKOR) complex which reduces inactive vitamin K 2,3-epoxide to active vitamin K.	vit K metabolism	vitamin metabolism			Nature 427, 537-541 (5 February 2004) | doi:10.1038/nature02214
familial hypercholesterolemia	EPHX2	2053		This gene encodes a member of the epoxide hydrolase family. The protein, found in both the cytosol and peroxisomes, binds to specific epoxides and converts them to the corresponding dihydrodiols.	xenobiotic metabolism	xenobiotic metabolism			http://www.biopestlab.ucdavis.edu/Labbib/557.pdf
D-glyceric acidemia	GLYCTK	132158		The encoded enzyme catalyzes the phosphorylation of (R)-glycerate and may be involved in serine degradation and fructose metabolism.	amino acid or carbohydrate metabolism	amino acid metabolism			PMID: 16753811
Cranioosteoarthropathy,Digital clubbing, isolated congenital and Hypertrophic osteoarthropathy, primary, autosomal recessive	HPGD	3248		Catalyzes the NAD-dependent dehydrogenation of lipoxin A4 to form 15-oxo-lipoxin A4.	lipid metabolism(prostaglandins)	lipid metabolism			PMID: 16283874, PMID: 19568269
Apolipoprotein H deficiency	APOH	350		Binds to various kinds of negatively charged substances such as heparin, phospholipids, and dextran sulfate. May prevent activation of the intrinsic blood coagulation cascade by binding to phospholipids on the surface of damaged cells.	lipid metabolism	lipid metabolism			HUMAN GENETICS Volume 105, Numbers 1-2, 63-71, DOI: 10.1007/s004390051065
High density lipoprotein cholesterol level QTL	PLTP	5360		The protein encoded by this gene is one of at least two lipid transfer proteins found in human plasma. The encoded protein transfers phospholipids from triglyceride-rich lipoproteins to high density lipoprotein (HDL). In addition to regulating the size of HDL particles, this protein may be involved in cholesterol metabolism	transporter defect(lipid transporters)	transporter defect			PMID: 20088939
rickets vitamin D-dependent type 1B (VDDR1B)/pseudovitamin D(3) deficiency rickets due to 25-hydroxylase deficiency	CYP2R1	120227		Has a D-25-hydroxylase activity on both forms of vitamin D, vitamin D(2) and D(3).	vit D metabolism	vitamin metabolism			PMID: 20146166
pulmonary surfactant metabolism dysfunction type 3 (SMDP3)	ABCA3	21		Plays an important role in the formation of pulmonary surfactant, probably by transporting lipids such as cholesterol	lipid metabolism	lipid metabolism			PMID: 19220077
ichthyosis lamellar type 3 (LI3)	CYP4F22	126410		encodes an enzyme thought to play a role in the 12(R)-lipoxygenase pathway.	lipid metabolism(prostaglandins)	lipid metabolism			PMID: 18245815,PMID: 1492060
early onset bilateral and multifocal clear cell renal carcinoma	FHIT	2272		encodes a diadenosine 5',5'''-P1,P3-triphosphate hydrolase involved in purine metabolism.	nucleotide metabolism	nucleotide metabolism			http://jco.ascopubs.org/content/27/23/3731.full.pdf
Carboxylesterase 1 deficiency	CES1	1066		hydrolysis or transesterification of various xenobiotics, such as cocaine and heroin, and endogenous substrates with ester, thioester, or amide bonds. They may participate in fatty acyl and cholesterol ester metabolism, and may play a role in the blood-brain barrier system. This enzyme is the major liver enzyme and functions in liver drug clearance.	xenobiotic metabolism	xenobiotic metabolism			PMCID: PMC2427248
hereditary megaloblastic anemia 1 (MGA1)	CUBN	8029		Cubilin (CUBN) acts as a receptor for intrinsic factor-vitamin B12 complexes	transporter defect	transporter defect			PMID: 10887099
Glycogen storage disease Ixc	PHKG2	5261		Phosphorylase b kinase catalyzes the phosphorylation of serine in certain substrates, including troponin I. This isozyme may regulate glycogeneolysis in the testis.		regulatory pathway	regulatory pathway involved in muscles		PMID: 17689125
Muscle glycogenosis/ glycogen storage disease type 9D (GSD9D)	PHKA1	5255		Phosphorylase b kinase catalyzes the phosphorylation of serine in certain substrates, including troponin I. The alpha chain may bind calmodulin		regulatory pathway	regulatory pathway involved in muscles		PMID: 18401027
Bartter syndrome type 4A (BS4A) with sensorineural deafness	BSND	7809		Functions as a beta-subunit for CLCNKA and CLCNKB chloride channels. In the kidney CLCNK/BSND heteromers mediate chloride reabsorption by facilitating its basolateral efflux. In the stria, CLCNK/BSND channels drive potassium secretion by recycling chloride for the basolateral SLC12A2 cotransporter.	chloride channels	transporter defect			PMID: 19646679
Apnea, postanesthetic	BCHE	590		Esterase with broad substrate specificity. Contributes to the inactivation of the neurotransmitter acetylcholine. Can degrade neurotoxic organophosphate esters.		regulatory pathway	neurotransmission		OMIM:177400, PMID: 18075469
6-mercaptopurine sensitivity	TPMT	7172		Catalyzes the S-methylation of thiopurine drugs such as 6-mercaptopurine.	nucleotide metabolism	nucleotide metabolism			PMID: 20153897
glycogen storage disease type 9A	PHKA2	5256		Phosphorylase b kinase catalyzes the phosphorylation of serine in certain substrates, including troponin I. The alpha chain may bind calmodulin.		lipid metabolism	regulatory pathway involved in muscles		PMID: 17581768
1)Diabetes mellitus, insulin-resistant, with acanthosis nigricans, 2)Hyperinsulinemic hypoglycemia, familial, 5, 3)Leprechaunism and 4)Rabson-Mendenhall syndrome	INSR	3643		insulin receptor		lipid metabolism	regulatory pathway(insulin)		PMID: 15232309
neonatal onset insulin-dependent diabetes mellitus,Immune dysregulation, polyendocrinopathy, enteropathy, X-linked (IPEX) syndrome	FOXP3	50943		member of the forkhead/winged-helix family of transcriptional regulators. Type 1 diabetes mellitus is an autoimmune condition involving the pancreas and is the most common endocrine disorder present in people with IPEX syndrome.		regulatory pathway	regulatory pathway		http://www.ncbi.nlm.nih.gov/bookshelf/br.fcgi?book=gene&part=dmn,http://www.ncbi.nlm.nih.gov/bookshelf/br.fcgi?book=gene&part=ipex
enterokinase deficiency	TMPRSS15	5651		enzyme that converts the pancreatic proenzyme trypsinogen to trypsin, which activates other proenzymes including chymotrypsinogen and procarboxypeptidases	protein metabolism(digestion)	amino acid metabolism			PMID: 6347801
Angelman syndrome	UBE3A	7337		This gene encodes an E3 ubiquitin-protein ligase, part of the ubiquitin protein degradation system	protein metabolism(degradation)	amino acid metabolism			http://www.ncbi.nlm.nih.gov/bookshelf/br.fcgi?book=gene&part=angelman
emphysema or liver disease	SERPINA1	5265		serine protease inhibitor whose targets include elastase, plasmin, thrombin, trypsin, chymotrypsin, and plasminogen activator	protein metabolism	amino acid metabolism			http://www.ncbi.nlm.nih.gov/bookshelf/br.fcgi?book=gene&part=alpha1-a
Molybdenum cofactor deficiency, type B	MOCS2	4338		Eukaryotic molybdoenzymes use a unique molybdenum cofactor (MoCo) consisting of a pterin, termed molybdopterin, and the catalytically active metal molybdenum. MoCo is synthesized from precursor Z by the heterodimeric enzyme molybdopterin synthase. The large and small subunits of molybdopterin synthase are both encoded from this gene by overlapping open reading frames.	molybdenum co-factor synthesis	mineral metabolism			PMID: 12754701
Molybdenum cofactor deficiency, type A	MOCS1	4337		Molybdenum cofactor biosynthesis is a conserved pathway leading to the biological activation of molybdenum. The protein encoded by this gene is involved in this pathway.	molybdenum co-factor synthesis	mineral metabolism			PMID: 12754701
Chediak-Higashi syndrome	LYST	1130		This gene is thought to encode a protein that regulates intracellular protein trafficking to and from the lysosome.		regulatory pathway	regulatory pathway(lysosomal protein trafficking)		http://www.ncbi.nlm.nih.gov/bookshelf/br.fcgi?book=gene&part=chediak-higashi
Marfan syndrome type 1, isolated ectopia lentis, autosomal dominant Weill-Marchesani syndrome, MASS syndrome, and Shprintzen-Goldberg craniosynostosis syndrome.	FBN1	2200		This gene encodes a member of the fibrillin family. The encoded protein is a large, extracellular matrix glycoprotein that serve as a structural component of 10-12 nm calcium-binding microfibrils. These microfibrils provide force bearing structural support in elastic and nonelastic connective tissue throughout the body		regulatory pathway	extracellular matrix protein		http://www.ncbi.nlm.nih.gov/bookshelf/br.fcgi?book=gene&part=marfan
Marfan Syndrome type 2, Loeys-Deitz Aortic Aneurysm Syndrome	TGFBR2	7048		This gene encodes a member of the Ser/Thr protein kinase family and the TGFB receptor subfamily. The encoded protein is a transmembrane protein that has a protein kinase domain, forms a heterodimeric complex with another receptor protein, and binds TGF-beta. This receptor/ligand complex phosphorylates proteins, which then enter the nucleus and regulate the transcription of a subset of genes relat…		regulatory pathway	regulatory pathway		http://www.ncbi.nlm.nih.gov/bookshelf/br.fcgi?book=gene&part=marfan
Hermansky-Pudlak syndrome	HPS1 and HPS3	3257 and 84343		This gene encodes a protein that may play a role in organelle biogenesis associated with melanosomes, platelet dense granules, and lysosomes. The encoded protein is a component of three different protein complexes termed biogenesis of lysosome-related organelles complex (BLOC)-3, BLOC4, and BLOC5. HPS3 gene encodes a protein containing a potential clathrin-binding motif, consensus dileucine signa…		regulatory pathway	regulatory pathway(organelle biogenesis)		http://www.ncbi.nlm.nih.gov/bookshelf/br.fcgi?book=gene&part=hps
glutaric aciduria type III	C7orf10	79783		This gene encodes a protein that is similar to members of the CaiB/baiF CoA-transferase protein family		regulatory pathway	regulatory pathway		OMIM:231690
abetalipoproteinemia	MTTP	4547		encodes the large subunit of the heterodimeric microsomal triglyceride transfer protein. Protein disulfide isomerase (PDI) completes the heterodimeric microsomal triglyceride transfer protein, which has been shown to play a central role in lipoprotein assembly.	lipid metabolism	lipid metabolism			http://ghr.nlm.nih.gov/condition/abetalipoproteinemia, OMIM:200100
apoC-II deficiency	APOC2	344		The protein encoded by this gene is secreted in plasma where it is a component of very low density lipoprotein. This protein activates the enzyme lipoprotein lipase, which hydrolyzes triglycerides and thus provides free fatty acids for cells.	lipid metabolism	lipid metabolism			OMIM:207750
type V hyperlipoproteinemia	APOA5	116519		The protein encoded by this gene is an apolipoprotein that plays an important role in regulating the plasma triglyceride levels, a major risk factor for coronary artery disease. It is a component of high density lipoprotein and is highly similar to a rat protein that is upregulated in response to liver injury	lipid metabolism	lipid metabolism			OMIM:144650 http://ghr.nlm.nih.gov/gene/APOA5
type 3 hyperlipoproteinemia	APOE	348		Chylomicron remnants and very low density lipoprotein (VLDL) remnants are rapidly removed from the circulation by receptor-mediated endocytosis in the liver. Apolipoprotein E, a main apoprotein of the chylomicron, binds to a specific receptor on liver cells and peripheral cells. ApoE is essential for the normal catabolism of triglyceride-rich lipoprotein constituents	lipid metabolism	lipid metabolism			OMIM:107741 http://ghr.nlm.nih.gov/gene/APOE
sitosterolemia	ABCG8 or ABCG5	64241 or 64240		The protein encoded by this gene is a member of the superfamily of ATP-binding cassette (ABC) transporters. ABC proteins transport various molecules across extra- and intra-cellular membranes. ABC genes are divided into seven distinct subfamilies (ABC1, MDR/TAP, MRP, ALD, OABP, GCN20, White). This protein is a member of the White subfamily. The protein encoded by this gene functions to exclude no…	lipid transporters	lipid metabolism			OMIM:210250
Androgen insensitivity syndrome	AR	367		The androgen receptor gene is more than 90 kb long and codes for a protein that has 3 major functional domains: the N-terminal domain, DNA-binding domain, and androgen-binding domain. The protein functions as a steroid-hormone activated transcription factor. Upon binding the hormone ligand, the receptor dissociates from accessory proteins, translocates into the nucleus, dimerizes, and then stimul…		regulatory pathway	regulatory pathway		OMIM:300068 http://www.ncbi.nlm.nih.gov/bookshelf/br.fcgi?book=gene&part=androgen
Xeroderma pigmentosum	ERCC2, ERCC3, POLH, XPA, and XPC	2068, 2071, 5429, 7507 and 7508		DNA repair genes		regulatory pathway	regulatory pathway		OMIM:http://ghr.nlm.nih.gov/condition/xeroderma-pigmentosum, http://www.ncbi.nlm.nih.gov/bookshelf/br.fcgi?book=gene&part=xp
Hemochromatosis	HAMP, HFE, HFE2, SLC40A1, and TFR2	57817, 3077, 148738, 30061 and 7036		genes play an important role in regulating the absorption, transport, and storage of iron	iron metabolism	mineral metabolism			http://ghr.nlm.nih.gov/condition/hemochromatosis
Alpha-1 antitrypsin deficiency	SERPINA1	5265		The protein encoded by this gene is secreted and is a serine protease inhibitor whose targets include elastase, plasmin, thrombin, trypsin, chymotrypsin, and plasminogen activator	protein metabolism	amino acid metabolism			http://ghr.nlm.nih.gov/condition/alpha-1-antitrypsin-deficiency, http://www.ncbi.nlm.nih.gov/bookshelf/br.fcgi?book=gene&part=alpha1-a, OMIM:107400
Familial Mediterranean fever with nephropathy	MEFV	4210		encodes a protein, also known as pyrin or marenostrin, that is an important modulator of innate immunity.		regulatory pathway	regulatory pathway		OMIM.249100
hereditary systemic amyloidoses with cardiac and neuropathic types	TTR	7276		This gene encodes transthyretin, one of the three prealbumins including alpha-1-antitrypsin, transthyretin and orosomucoid. Transthyretin is a carrier protein; it transports thyroid hormones in the plasma and cerebrospinal fluid, and also transports retinol (vitamin A) in the plasma. The protein consists of a tetramer of identical subunits. More than 80 different mutations in this gene have been …	hormone metabolism(thyroid)	hormone metabolism			OMIM:176300
Duchenne and Becker types of muscular dystrophy	DMD	1756		The dystrophin gene is the largest gene found in nature, measuring 2.4 Mb. The gene was identified through a positional cloning approach, targeted at the isolation of the gene responsible for Duchenne (DMD) and Becker (BMD) Muscular Dystrophies. DMD is a recessive, fatal, X-linked disorder occurring at a frequency of about 1 in 3,500 new-born males. BMD is a milder allelic form. In general, DMD p…		regulatory pathway	regulatory pathway		http://ghr.nlm.nih.gov/condition/duchenne-and-becker-muscular-dystrophy,http://www.ncbi.nlm.nih.gov/bookshelf/br.fcgi?book=gene&part=dbmd, http://www.ncbi.nlm.nih.gov/bookshelf/br.fcgi?book=gene&part=dcm-ov, OMIM:300376 and OMIM:310200
Myotonic dystrophy type 1	DMPK	1760		The protein encoded by this gene is a serine-threonine kinase that is closely related to other kinases that interact with members of the Rho family of small GTPases. Substrates for this enzyme include myogenin, the beta-subunit of the L-type calcium channels, and phospholemman. The 3' untranslated region of this gene contains 5-37 copies of a CTG trinucleotide repeat. Expansion of this unstable m…		regulatory pathway	regulatory pathway		http://www.ncbi.nlm.nih.gov/bookshelf/br.fcgi?book=gene&part=myotonic-d, OMIM:160900
Myotonic dystrophy type 2	CNBP	7555		This gene encodes a nucleic-acid binding protein with seven zinc-finger domains. The protein has a preference for binding single stranded DNA and RNA. The protein functions in cap-independent translation of ornithine decarboxylase mRNA, and may also function in sterol-mediated transcriptional regulation. A CCTG expansion in the first intron of this gene results in myotonic dystrophy type 2		regulatory pathway	regulatory pathway		http://www.ncbi.nlm.nih.gov/bookshelf/br.fcgi?book=gene&part=myotonic-d2, OMIM:602668
Hyperkalemic periodic paralysis	SCN4A	6329		Voltage-gated sodium channels are transmembrane glycoprotein complexes composed of a large alpha subunit with 24 transmembrane domains and one or more regulatory beta subunits. They are responsible for the generation and propagation of action potentials in neurons and muscle. This gene encodes one member of the sodium channel alpha subunit gene family. It is expressed in skeletal muscle, and muta…	sodium channel	transporter defect			http://www.ncbi.nlm.nih.gov/bookshelf/br.fcgi?book=gene&part=hyper-pp, OMIM:170500
Hypokalemic periodic paralysis	CACNA1S and SCN4A	779 and 6329		This gene encodes one of the five subunits of the slowly inactivating L-type voltage-dependent calcium channel in skeletal muscle cells. Mutations in this gene have been associated with hypokalemic periodic paralysis, thyrotoxic periodic paralysis and malignant hyperthermia susceptibility	calcium channel	transporter defect			http://www.ncbi.nlm.nih.gov/bookshelf/br.fcgi?book=gene&part=hpp, OMIM:170400
pseudohypoparathyroidism type Ia	GNAS	2778		This locus has a highly complex imprinted expression pattern. It gives rise to maternally, paternally, and biallelically expressed transcripts that are derived from four alternative promoters and 5' exons. Some transcripts contains a differentially methylated region (DMR) at their 5' exons, and this DMR is commonly found in imprinted genes and correlates with transcript expression. An antisense t…		regulatory pathway	regulatory pathway		OMIM:103580
Hemophilia A	F8	2157		encodes coagulation factor VIII, which participates in the intrinsic pathway of blood coagulation; factor VIII is a cofactor for factor IXa which, in the presence of Ca+2 and phospholipids, converts factor X to the activated form Xa.	blood coagulation cascade	blood disorder			http://www.ncbi.nlm.nih.gov/bookshelf/br.fcgi?book=gene&part=hemo-a, OMIM:306700
hemophilia B	F9	2158		encodes vitamin K-dependent coagulation factor IX that circulates in the blood as an inactive zymogen. This factor is converted to an active form by factor XIa, which excises the activation peptide and thus generates a heavy chain and a light chain held together by one or more disulfide bonds. The role of this activated factor IX in the blood coagulation cascade is to activate factor X to its act…	blood coagulation cascade	blood disorder			http://www.ncbi.nlm.nih.gov/bookshelf/br.fcgi?book=gene&part=hemo-b ,OMIM:306900
von Willebrand disease (VWD) type 1	VWF	7450		The glycoprotein encoded by this gene functions as both an antihemophilic factor carrier and a platelet-vessel wall mediator in the blood coagulation system. It is crucial to the hemostasis process		regulatory pathway	regulatory pathway		OMIM:193400
Bernard-Soulier syndrome type A	GP1BA	2811		Glycoprotein Ib (GP Ib) is a platelet surface membrane glycoprotein composed of a heterodimer, an alpha chain and a beta chain, that is linked by disulfide bonds. The Gp Ib functions as a receptor for von Willebrand factor (VWF). The complete receptor complex includes noncovalent association of the alpha and beta subunits with platelet glycoprotein IX and platelet glycoprotein V. The binding of t…		regulatory pathway	regulatory pathway		OMIM:231200
Bernard-Soulier syndrome type B	GP1BB	2812		Platelet glycoprotein Ib (GPIb) is a heterodimeric transmembrane protein consisting of a disulfide-linked 140 kD alpha chain and 22 kD beta chain. It is part of the GPIb-V-IX system that constitutes the receptor for von Willebrand factor (VWF), and mediates platelet adhesion in the arterial circulation.		regulatory pathway	regulatory pathway		OMIM:231200
Bernard-Soulier syndrome type C	GP9	2815		This gene encodes a small membrane glycoprotein found on the surface of human platelets. It forms a 1-to-1 noncovalent complex with glycoprotein Ib, a platelet surface membrane glycoprotein complex that functions as a receptor for von Willebrand factor. The complete receptor complex includes noncovalent association of the alpha and beta subunits with the protein encoded by this gene and platelet …		regulatory pathway	regulatory pathway		OMIM:231200
glanzmann´s thrombasthenia	ITGB3 and ITGA2B	3690 and 3674		The ITGB3 protein product is the integrin beta chain beta 3. Integrins are integral cell-surface proteins composed of an alpha chain and a beta chain. A given chain may combine with multiple partners resulting in different integrins. Integrin beta 3 is found along with the alpha IIb chain in platelets. Integrins are known to participate in cell adhesion as well as cell-surface mediated signalling…		regulatory pathway	signalling pathway		OMIM:173470, OMIM:607759, OMIM:600065,
hereditary spherocytosis type 2	SPTB	6710		This locus encodes a member of the spectrin gene family. Spectrin proteins, along with ankyrin, play a role in cell membrane organization and stability. The protein encoded by this locus functions in stability of erythrocyte membranes, and mutations in this gene have been associated with spherocytosis type 2, hereditary elliptocytosis, and neonatal hemolytic anemia.		regulatory pathway	regulatory pathway		OMIM:182870
Hereditary spherocytosis type 1	ANK1	286		Ankyrins are a family of proteins that link the integral membrane proteins to the underlying spectrin-actin cytoskeleton and play key roles in activities such as cell motility, activation, proliferation, contact and the maintenance of specialized membrane domains. Multiple isoforms of ankyrin with different affinities for various target proteins are expressed in a tissue-specific, developmentally…		regulatory pathway	regulatory pathway		OMIM:182900
hereditary spherocytosis-3	SPTA1	6708		Spectrin is an actin crosslinking and molecular scaffold protein that links the plasma membrane to the actin cytoskeleton, and functions in the determination of cell shape, arrangement of transmembrane proteins, and organization of organelles. It is a tetramer made up of alpha-beta dimers linked in a head-to-head arrangement. This gene is one member of a family of alpha-spectrin genes. The encode…		regulatory pathway	regulatory pathway		OMIM:270970
hereditary spherocytosis-5	EPB42	2038		Erythrocyte membrane protein band 4.2 is an ATP-binding protein which may regulate the association of protein 3 with ankyrin. It probably has a role in erythrocyte shape and mechanical property regulation. Mutations in the EPB42 gene are associated with recessive spherocytic elliptocytosis and recessively transmitted hereditary hemolytic anemia		regulatory pathway	regulatory pathway		OMIM:612690
Beta-globin type methemoglobinemia and Sickle cell disease and Beta thalassemia	HBB	3043		The alpha (HBA) and beta (HBB) loci determine the structure of the 2 types of polypeptide chains in adult hemoglobin, Hb A. The normal adult hemoglobin tetramer consists of two alpha chains and two beta chains.	hemoglobin metabolism	amino acid metabolism			OMIM:141900
Polycythemia vera	JAK2 and TET2	3717 and 54790		The function of the TET2 gene is unknown. The JAK2 gene provides instructions for making a protein that promotes the growth and division (proliferation) of cells. The JAK2 protein is especially important for controlling the production of blood cells from hematopoietic stem cells. These stem cells are located within the bone marrow and have the potential to develop into red blood cells, white bloo…		regulatory pathway	regulatory pathway		OMIM:263300
Alpha thalassemia X-linked mental retardation syndrome	ATRX	546		The protein encoded by this gene contains an ATPase/helicase domain, and thus it belongs to the SWI/SNF family of chromatin remodeling proteins. The mutations of this gene are associated with an X-linked mental retardation (XLMR) syndrome most often accompanied by alpha-thalassemia (ATRX) syndrome. These mutations have been shown to cause diverse changes in the pattern of DNA methylation, which m…		regulatory pathway	regulatory pathway		http://www.ncbi.nlm.nih.gov/bookshelf/br.fcgi?book=gene&part=xlmr, OMIM:301040
Alpha thalassemia	HBA1 and HBA2	3039 and 3040		Both of these genes provide instructions for making a protein called alpha-globin, which is a component (subunit) of hemoglobin.	hemoglobin metabolism	amino acid metabolism			http://www.ncbi.nlm.nih.gov/bookshelf/br.fcgi?book=gene&part=a-thal, OMIM:141800, OMIM:141850, OMIM:604131
iminoglycinuria	SLC36A2 and SLC6A20 and SLC6A19	153201 and 54716 and 340024		SLC36A2 gene encodes a pH-dependent proton-coupled amino acid transporter that belongs to the amino acid auxin permease 1 protein family. The encoded protein primarily transports small amino acids such as glycine, alanine and proline. SLC6A20 encodes a member of the subgroup of transporter with unidentified substrates within the Na+ and Cl- coupled transporter family. This gene is expressed in ki…	transporters(amino acids)	transporter defect			OMIM:242600
hartnup disorder	SLC6A19	340024		This gene encodes a system B(0) transmembrane protein that actively transports most neutral amino acids across the apical membrane of epithelial cells.	transporters(amino acids)	transporter defect			OMIM.234500
Renal glucosuria associated with juvenile cataract with microcornea	SLC16A12	387700		This gene encodes a transmembrane transporter that likely plays a role in monocarboxylic acid transport.	transporters	transporter defect			OMIM:233100
Nephrogenic diabetes insipidus	AVPR2 and AQP2	554 and 359		AVPR2 gene encodes the vasopressin receptor, type 2, also known as the V2 receptor, which belongs to the seven-transmembrane-domain G protein-coupled receptor (GPCR) superfamily, and couples to Gs thus stimulating adenylate cyclase. The subfamily that includes the V2 receptor, the V1a and V1b vasopressin receptors, the oxytocin receptor, and isotocin and mesotocin receptors in non-mammals, is wel…		regulatory pathway	regulatory pathway(hormones)		http://www.ncbi.nlm.nih.gov/bookshelf/br.fcgi?book=gene&part=ndi, OMIM:125800 and OMIM:304800
Cystic fibrosis	CFTR	1080		The encoded protein functions as a chloride channel and controls the regulation of other transport pathways	chloride channels	transporter defect			http://www.ncbi.nlm.nih.gov/bookshelf/br.fcgi?book=gene&part=cf, OMIM:219700
X-linked agammaglobulinemia (XLA)	BTK	695		The protein encoded by this gene plays a crucial role in B-cell development.		regulatory pathway	regulatory pathway		http://www.ncbi.nlm.nih.gov/bookshelf/br.fcgi?book=gene&part=xla, OMIM:300755
Hereditary angioedema	SERPING1 and F12	710 and 2161		F12 gene encodes coagulation factor XII which circulates in blood as a zymogen. SERPING1 gene encodes a highly glycosylated plasma protein involved in the regulation of the complement cascade. Its protein inhibits activated C1r and C1s of the first complement component and thus regulates complement activation.		regulatory pathway	complement activation		OMIM.106100, OMIM:610618
Complement factor I deficiency	CFI	3426		This gene encodes a serine proteinase that is essential for regulating the complement cascade. The encoded preproprotein is cleaved to produce both heavy and light chains, which are linked by disulfide bonds to form a heterodimeric glycoprotein. This heterodimer can cleave and inactivate the complement components C4b and C3b, and it prevents the assembly of the C3 and C5 convertase enzymes.		regulatory pathway	complement activation		OMIM:610984
X-linked chronic granulomatous disease (CGD)	CYBB	1536		Cytochrome b (-245) is composed of cytochrome b alpha (CYBA) and beta (CYBB) chain. It has been proposed as a primary component of the microbicidal oxidase system of phagocytes. CYBB deficiency is one of five described biochemical defects associated with chronic granulomatous disease (CGD)		regulatory pathway	regulatory pathway		OMIM:306400
chronic granulomatous disease (CGD) type I	NCF1	653361		The protein encoded by this gene is a 47 kDa cytosolic subunit of neutrophil NADPH oxidase. This oxidase is a multicomponent enzyme that is activated to produce superoxide anion.	free radical mechanism	xenobiotic metabolism			OMIM:233700
familial intrahepatic cholestasis-1 (PFIC1)	ATP8B1	5205		This gene encodes a member of the P-type cation transport ATPase family, which belongs to the subfamily of aminophospholipid-transporting ATPases. The aminophospholipid translocases transport phosphatidylserine and phosphatidylethanolamine from one side of a bilayer to another.	phospholipid metabolism	lipid metabolism			OMIM:211600
GRACILE syndrome	BCS1L	617		This gene encodes a homolog of the S. cerevisiae bcs1 protein which is involved in the assembly of complex III of the mitochondrial respiratory chain. The encoded protein does not contain a mitochondrial targeting sequence but experimental studies confirm that it is imported into mitochondria. Mutations in this gene are associated with mitochondrial complex III deficiency and the GRACILE syndrome.	mitochondrial respiratory chain	ETC			OMIM:603358
SUMF1 disease/ multiple sulfatase deficiency	SUMF1	285362		This gene encodes an enzyme that catalyzes the hydrolysis of sulfate esters by oxidizing a cysteine residue in the substrate sulfatase to an active site 3-oxoalanine residue, which is also known as C-alpha-formylglycine. Mutations in this gene cause multiple sulfatase deficiency, a lysosomal storage disorder	lysosomal storage disorder	lipid metabolism			OMIM: 272200
