# Supplementary material for: A compendium of inborn errors of metabolism mapped onto the human metabolic network
Source: Royal Society of Chemistry journal article supplement (doi:10.1039/c2mb25075f), 2012-05-02
Supplement: c2mb25075f_3.xlsx [file c2mb25075f_3.xlsx]

## Sheet: reactions
Reaction Abbreviation	Reaction Name	Reaction formula	Subsystem	Protein	EC Number	Confidence score	GPR	Notes	Physiological Evidence
2MB2COAc	'2MB2COAc'	'2mb2coa[m] <=> 2mb2coa[c] '	'FAO'	Acyl-CoA-binding protein	''	3	'1622.1'	'acyl coA binding protein is localized in cytosol, nucelus, golgi, E.R., mitochondrial inter memebrane space. In mitochondria its released when the integrity of the organelle is compromised. It has wide role in lipid metabolism, also acts as a coA transporter between different cellular compartments. can transport accumulated acyl coAs from cutosol into mitochondria for beta oxidation or into cyto…	'PMID: 20511713, PMID: 11859412, PMID: 16908521, PMID: 8001684'
3HBCOARc	'3HBCOARc'	'3hbcoa_R[m] <=> 3hbcoa_R[c] '	'FAO'	Acyl-CoA-binding protein	''	3	'1622.1'	'acyl coA binding protein is localized in cytosol, nucelus, golgi, E.R., mitochondrial inter memebrane space. In mitochondria its released when the integrity of the organelle is compromised. It has wide role in lipid metabolism, also acts as a coA transporter between different cellular compartments. can transport accumulated acyl coAs from cutosol into mitochondria for beta oxidation or into cyto…	'PMID: 20511713, PMID: 11859412, PMID: 16908521, PMID: 8001684'
ADPACDAc	'ADPACDAc'	'atp[c] + coa[c] + adpac[c] -> amp[c] + ppi[c] + adpcoa[c] '	'FAO'	0	''	2	''	'dicarboxylic coa synthetase, origin and gene not known'	'Hunt MC, Alexson SEH. (2008). Progress in Lipid Research 47: 405-21'
ADPACTD	'ADPACTD'	'adpac[x] <=> adpac[c] '	'FAO'	0	''	2	''	'simple diffusion of fatty acids freely across membranes'	'Glatz JFC, Luiken JJFP, Bonen A. (2010). Physiological Reviews 90: 367-417, Kamp F, Hamilton JA. (2006). Prostaglandins, Leukotrienes and Essential Fatty Acids 75: 149-59, PMCID: PMC2785172, Evtodienko VY, Bondarenko DI, Antonenko YN. (1999). Biochimica et Biophysica Acta (BBA) - Biomembranes 1420: 95-103'
ADPCOACROT	'ADPCOACROT'	'crn[x] + adpcoa[x] <=> coa[x] + c6dc[x] '	'FAO'	0	'2.3.1.137'	3	'54677.1'	'alternatively peroxisomal carnitine O-octanoyltransferase may convert adipoyl coa into adipoyl carnitine and excreted out. Thioesterases and CRAT/CROT show same substrate specificty and similar Vmax and Km values, however author suggested there is no competition as they are expressed differentially in different tissues.'	'PMID: 15060085, Westin M, Hunt M, Alexson S. (2008). Cellular and Molecular Life Sciences 65: 982-90, PMID: 20560540'
ADPCOAPTE	'ADPCOAPTE'	'h2o[x] + adpcoa[x] -> coa[x] + h[x] + adpac[x] '	'FAO'	Acyl-coenzyme A thioesterase 8	'3.1.2.27'	4	'10005.1'	'human peroxisomal thioesterases are ACOT-4 and ACOT-8. ACOT 4 is specific for C4DC and C5DC, where as ACOT-8 catalyzes wide range of substrates. One proton added to the product for balancing'	'PMID: 15007068, PMID: 18538142, Westin MAK, Hunt MC, Alexson SEH. (2005). Journal of Biological Chemistry 280: 38125-32'
BCRNe	'BCRNe'	'3bcrn[c] -> 3bcrn[e] '	'FAO'	0	''	2	''	'mitochondrial aceto acetyl coA thiolase deficiency, high levels of 3-hydroxy butyryl carnitine in urine. In SCHAD high blood levels of 3-hydroxy butyryl carnitine.'	'PMID: 20157782, Han L, Ye J, Qiu W, Gao X, Wang Y, Gu X. (2007). Journal of Inherited Metabolic Disease 30: 507-14, PMID: 11489939'
C100CPT1	'C100CPT1'	'crn[c] + dcacoa[c] <=> coa[c] + c10crn[c] '	'FAO'	Carnitine O-palmitoyltransferase 1, liver isoform,Carnitine O-palmitoyltransferase 1, muscle isoform,Carnitine O-palmitoyltransferase 1, brain isoform	'2.3.1.21'	4	'(1374.1 or 1375.1 or 126129.1)'	''	'PMID: 18767270, PMID: 18075239'
sink_c101coa	C101COASINK'	'c101coa[c] <=> '	'FAO'	0	''	1	''	''	''
C101CPT1	'C101CPT1'	'crn[c] + c101coa[c] <=> coa[c] + c101crn[c] '	'FAO'	Carnitine O-palmitoyltransferase 1, liver isoform,Carnitine O-palmitoyltransferase 1, muscle isoform,Carnitine O-palmitoyltransferase 1, brain isoform	'2.3.1.21'	4	'(1374.1 or 1375.1 or 126129.1)'	''	'PMID: 7551818 '
C101CRNe	'C101CRNe'	'c101crn[c] -> c101crn[e] '	'FAO'	0	''	2	''	'elevated in MCAD'	'Jones LL, McDonald DA, Borum PR. (2010). Progress in Lipid Research 49: 61-75'
C102CPT1	'C102CPT1'	'crn[c] + decdicoa[c] <=> coa[c] + decdicrn[c] '	'FAO'	Carnitine O-palmitoyltransferase 1, liver isoform,Carnitine O-palmitoyltransferase 1, muscle isoform,Carnitine O-palmitoyltransferase 1, brain isoform	'2.3.1.21'	4	'(1374.1 or 1375.1 or 126129.1)'	''	'PMID: 19578400'
C10CRNe	'C10CRNe'	'c10crn[c] -> c10crn[e] '	'FAO'	0	''	2	''	'elevated in MCAD'	'Jones LL, McDonald DA, Borum PR. (2010). Progress in Lipid Research 49: 61-75'
C10DCCACT	'C10DCCACT'	'c10dc[x] <=> c10dc[c] '	'FAO'	0	''	2	'788.1'	'acyl carnitines transported by CACT.'	'Westin M, Hunt M, Alexson S. (2008). Cellular and Molecular Life Sciences 65: 982-90. doi:10.1006/mgme.2000.3055,doi:10.1006/bbrc.1999.1340,biochimica et biophysica acta 1546 (2001) 21-43'
C10DCc	'C10DCc'	'crn[c] + sebcoa[c] <=> coa[c] + c10dc[c] '	'FAO'	Carnitine O-palmitoyltransferase 1, liver isoform,Carnitine O-palmitoyltransferase 1, muscle isoform,Carnitine O-palmitoyltransferase 1, brain isoform	'2.3.1.21'	4	'(1374.1 or 1375.1 or 126129.1)'	''	'PMID: 20173117, doi:10.1016/j.physletb.2003.10.071'
C10DCe	'C10DCe'	'c10dc[c] -> c10dc[e] '	'FAO'	0	''	2	''	'elevated levels in urine in case of dicarboxylic aciduria'	'PMID: 6959231, PMID: 3119938'
C10OHc	'C10OHc'	'crn[c] + 3hdcoa[c] <=> coa[c] + 3deccrn[c] '	'FAO'	Carnitine O-palmitoyltransferase 1, liver isoform,Carnitine O-palmitoyltransferase 1, muscle isoform,Carnitine O-palmitoyltransferase 1, brain isoform	'2.3.1.21'	4	'(1374.1 or 1375.1 or 126129.1)'	''	'clinical chemistry 46:2, 149-155(2000), Biochemistry 2005, 44, 5234-5245'
C120CPT1	'C120CPT1'	'crn[c] + ddcacoa[c] <=> coa[c] + ddeccrn[c] '	'FAO'	Carnitine O-palmitoyltransferase 1, liver isoform,Carnitine O-palmitoyltransferase 1, muscle isoform,Carnitine O-palmitoyltransferase 1, brain isoform	'2.3.1.21'	4	'(1374.1 or 1375.1 or 126129.1)'	''	'PMID: 12828998 , PMID: 9498103, PMID: 3955080'
C121CPT1	'C121CPT1'	'crn[c] + dd2coa[c] <=> coa[c] + ddece1crn[c] '	'FAO'	Carnitine O-palmitoyltransferase 1, liver isoform,Carnitine O-palmitoyltransferase 1, muscle isoform,Carnitine O-palmitoyltransferase 1, brain isoform	'2.3.1.21'	4	'(1374.1 or 1375.1 or 126129.1)'	''	'PMID: 18678604'
C12DCACOT	'C12DCACOT'	'h2o[x] + c12dccoa[x] -> coa[x] + h[x] + dodecanac[x] '	'FAO'	Acyl-coenzyme A thioesterase 8	'3.1.2.27'	4	'10005.1'	'human peroxisomal thioesterases are ACOT-4 and ACOT-8. ACOT 4 is specific for C4DC and C5DC, where as ACOT-8 catalyzes wide range of substrates. One proton added to the product for balancing'	'PMID: 15007068, PMID: 18538142, Westin MAK, Hunt MC, Alexson SEH. (2005). Journal of Biological Chemistry 280: 38125-32'
C12DCACT	'C12DCACT'	'atp[c] + coa[c] + dodecanac[c] -> amp[c] + ppi[c] + c12dccoa[c] '	'FAO'	0	''	2	''	'dicarboxylic coa synthetase, origin and gene not known'	'Hunt MC, Alexson SEH. (2008). Progress in Lipid Research 47: 405-21'
C12DCTD	'C12DCTD'	'dodecanac[x] <=> dodecanac[c] '	'FAO'	0	''	2	''	'simple diffusion of fatty acids freely across membranes'	'Glatz JFC, Luiken JJFP, Bonen A. (2010). Physiological Reviews 90: 367-417, Kamp F, Hamilton JA. (2006). Prostaglandins, Leukotrienes and Essential Fatty Acids 75: 149-59, PMCID: PMC2785172, Evtodienko VY, Bondarenko DI, Antonenko YN. (1999). Biochimica et Biophysica Acta (BBA) - Biomembranes 1420: 95-103'
C12DCe	'C12DCe'	'c12dc[c] -> c12dc[e] '	'FAO'	0	''	2	''	'elevated in urine in C-12 dicarboxylic aciduria '	'Korman SH, Waterham HR, Gutman A, Jakobs C, Wanders RJA. (2005). Molecular Genetics and Metabolism 86: 337-44'
C12OHc	'C12OHc'	'crn[c] + 3hddcoa[c] <=> coa[c] + 3ddcrn[c] '	'FAO'	Carnitine O-palmitoyltransferase 1, liver isoform,Carnitine O-palmitoyltransferase 1, muscle isoform,Carnitine O-palmitoyltransferase 1, brain isoform	'2.3.1.21'	4	'(1374.1 or 1375.1 or 126129.1)'	''	'clinical chemistry 46:2, 149-155(2000), Biochemistry 2005, 44, 5234-5245'
C140CPT1	'C140CPT1'	'crn[c] + tdcoa[c] <=> coa[c] + tdcrn[c] '	'FAO'	Carnitine O-palmitoyltransferase 1, liver isoform,Carnitine O-palmitoyltransferase 1, muscle isoform,Carnitine O-palmitoyltransferase 1, brain isoform	'2.3.1.21'	4	'(1374.1 or 1375.1 or 126129.1)'	''	'PMID: 19137688, PMID: 15653102, PMID: 12403251 '
C141ACBP	'C141ACBP'	'3tetd7ecoa[m] <=> 3tetd7ecoa[c] '	'FAO'	Acyl-CoA-binding protein	''	3	'1622.1'	'acyl coA binding protein is localized in cytosol, nucelus, golgi, E.R., mitochondrial inter memebrane space. In mitochondria its released when the integrity of the organelle is compromised. It has wide role in lipid metabolism, also acts as a coA transporter between different cellular compartments. can transport accumulated acyl coAs from cutosol into mitochondria for beta oxidation or into cyto…	'PMID: 20511713, PMID: 11859412, PMID: 16908521, PMID: 8001684'
C141CPT1	'C141CPT1'	'crn[c] + tetdece1coa[c] <=> coa[c] + tetdece1crn[c] '	'FAO'	Carnitine O-palmitoyltransferase 1, liver isoform,Carnitine O-palmitoyltransferase 1, muscle isoform,Carnitine O-palmitoyltransferase 1, brain isoform	'2.3.1.21'	4	'(1374.1 or 1375.1 or 126129.1)'	''	'PMID: 19327992 , PMID: 18670371, PMID: 15466478, PMID: 11433098'
C141OHc	'C141OHc'	'crn[c] + 3tetd7ecoa[c] <=> coa[c] + 3tetd7ecoacrn[c] '	'FAO'	0	'2.3.1.21'	2	'(1374.1 or 1375.1 or 126129.1)'	''	'PMID: 21281499'
C141OHe	'C141OHe'	'3tetd7ecoacrn[c] -> 3tetd7ecoacrn[e] '	'FAO'	0	''	2	''	''	'PMID: 21281499'
C142ACBP	'C142ACBP'	'3ttetddcoa[m] <=> 3ttetddcoa[c] '	'FAO'	Acyl-CoA-binding protein	''	3	'1622.1'	'acyl coA binding protein is localized in cytosol, nucelus, golgi, E.R., mitochondrial inter memebrane space. In mitochondria its released when the integrity of the organelle is compromised. It has wide role in lipid metabolism, also acts as a coA transporter between different cellular compartments. can transport accumulated acyl coAs from cutosol into mitochondria for beta oxidation or into cyto…	'PMID: 20511713, PMID: 11859412, PMID: 16908521, PMID: 8001684'
C142CPT1	'C142CPT1'	'crn[c] + tetdec2coa[c] <=> coa[c] + tetdec2crn[c] '	'FAO'	Carnitine O-palmitoyltransferase 1, liver isoform,Carnitine O-palmitoyltransferase 1, muscle isoform,Carnitine O-palmitoyltransferase 1, brain isoform	'2.3.1.21'	4	'(1374.1 or 1375.1 or 126129.1)'	''	'PMID: 11433098'
C142OHc	'C142OHc'	'crn[c] + 3ttetddcoa[c] <=> coa[c] + 3ttetddcoacrn[c] '	'FAO'	0	'2.3.1.21'	2	'(1374.1 or 1375.1 or 126129.1)'	''	'PMID: 21281499'
C142OHe	'C142OHe'	'3ttetddcoacrn[c] -> 3ttetddcoacrn[e] '	'FAO'	0	''	2	''	''	'PMID: 21281499'
C14OHc	'C14OHc'	'crn[c] + 3htdcoa[c] <=> coa[c] + 3tdcrn[c] '	'FAO'	Carnitine O-palmitoyltransferase 1, liver isoform,Carnitine O-palmitoyltransferase 1, muscle isoform,Carnitine O-palmitoyltransferase 1, brain isoform	'2.3.1.21'	4	'(1374.1 or 1375.1 or 126129.1)'	'molecular genetics and metabolism,Volume 85, Issue 2, June 2005, Pages 108-114 '	'molecular genetics and metabolism,Volume 85, Issue 2, June 2005, Pages 108-114 '
C161OHc	'C161OHc'	'crn[c] + 3hdeccoa[c] <=> coa[c] + 3hdececrn[c] '	'FAO'	Carnitine O-palmitoyltransferase 1, liver isoform,Carnitine O-palmitoyltransferase 1, muscle isoform,Carnitine O-palmitoyltransferase 1, brain isoform	'2.3.1.21'	4	'(1374.1 or 1375.1 or 126129.1)'	''	'Biochemistry 2005, 44, 5234-5245'
C162ACBP	'C162ACBP'	'3thexddcoa[m] <=> 3thexddcoa[c] '	'FAO'	Acyl-CoA-binding protein	''	3	'1622.1'	'acyl coA binding protein is localized in cytosol, nucelus, golgi, E.R., mitochondrial inter memebrane space. In mitochondria its released when the integrity of the organelle is compromised. It has wide role in lipid metabolism, also acts as a coA transporter between different cellular compartments. can transport accumulated acyl coAs from cutosol into mitochondria for beta oxidation or into cyto…	'PMID: 20511713, PMID: 11859412, PMID: 16908521, PMID: 8001684'
C162OHc	'C162OHc'	'crn[c] + 3thexddcoa[c] <=> coa[c] + 3thexddcoacrn[c] '	'FAO'	0	'2.3.1.21'	2	'(1374.1 or 1375.1 or 126129.1)'	''	'PMID: 21281499'
C162OHe	'C162OHe'	'3thexddcoacrn[c] -> 3thexddcoacrn[e] '	'FAO'	0	''	2	''	''	'PMID: 21281499'
C16DCc	'C16DCc'	'crn[c] + hexdicoa[c] <=> coa[c] + c16dc[c] '	'FAO'	Carnitine O-palmitoyltransferase 1, liver isoform,Carnitine O-palmitoyltransferase 1, muscle isoform,Carnitine O-palmitoyltransferase 1, brain isoform	'2.3.1.21'	4	'(1374.1 or 1375.1 or 126129.1)'	''	'journal of lipid research vol 15(1974), PMID: 20173117'
C16DCe	'C16DCe'	'c16dc[c] -> c16dc[e] '	'FAO'	0	''	2	''	'elevated in reye''s syndrome'	'PMCID: PMC1151043'
C16OHc	'C16OHc'	'crn[c] + 3hexdcoa[c] <=> coa[c] + 3hexdcrn[c] '	'FAO'	Carnitine O-palmitoyltransferase 1, liver isoform,Carnitine O-palmitoyltransferase 1, muscle isoform,Carnitine O-palmitoyltransferase 1, brain isoform	'2.3.1.21'	4	'(1374.1 or 1375.1 or 126129.1)'	''	'Biochemistry 2005, 44, 5234-5245'
C16txc	'C16txc'	'atp[c] + h2o[c] + pmtcoa[c] <=> adp[c] + h[c] + pi[c] + pmtcoa[x] '	'Transport, Peroxisomal'	ATP-binding cassette sub-family D member 1	''	4	'215.1'	'however palmitic acid is more favourable for mitochondrial beta oxidation'	'european journal of physiology(2007) 453:719-734,PMID: 18854420,PMID: 17039367'
C181OHc	'C181OHc'	'crn[c] + 3octdece1coa[c] <=> coa[c] + 3octdece1crn[c] '	'FAO'	Carnitine O-palmitoyltransferase 1, liver isoform,Carnitine O-palmitoyltransferase 1, muscle isoform,Carnitine O-palmitoyltransferase 1, brain isoform	'2.3.1.21'	4	'(1374.1 or 1375.1 or 126129.1)'	''	'Biochemistry 2005, 44, 5234-5245'
C182OHc	'C182OHc'	'crn[c] + 3ocddcoa[c] <=> coa[c] + 3octdec2crn[c] '	'FAO'	Carnitine O-palmitoyltransferase 1, liver isoform,Carnitine O-palmitoyltransferase 1, muscle isoform,Carnitine O-palmitoyltransferase 1, brain isoform	'2.3.1.21'	4	'(1374.1 or 1375.1 or 126129.1)'	''	'Biochemistry 2005, 44, 5234-5245'
C18OHc	'C18OHc'	'crn[c] + 3hodcoa[c] <=> coa[c] + 3octdeccrn[c] '	'FAO'	Carnitine O-palmitoyltransferase 1, liver isoform,Carnitine O-palmitoyltransferase 1, muscle isoform,Carnitine O-palmitoyltransferase 1, brain isoform	'2.3.1.21'	4	'(1374.1 or 1375.1 or 126129.1)'	''	'PMID: 7977144'
C2tcx	'C2tcx'	'acrn[x] <=> acrn[c] '	'Transport, Peroxisomal'	Mitochondrial carnitine/acylcarnitine carrier protein	''	4	'788.1'	''	'biochemical and biophysical research communications 263,213-218(1999),biochimica et biophysica acta 1546(2001)21-43'
C30CPT1	'C30CPT1'	'crn[c] + ppcoa[c] -> coa[c] + pcrn[c] '	'FAO'	Carnitine O-palmitoyltransferase 1, liver isoform,Carnitine O-palmitoyltransferase 1, muscle isoform,Carnitine O-palmitoyltransferase 1, brain isoform	'2.3.1.21'	4	'(1374.1 or 1375.1 or 126129.1)'	''	'PMID: 20056909, PMCID: PMC2914534'
C3DCe	'C3DCe'	'c3dc[c] -> c3dc[e] '	'FAO'	0	''	2	''	'elevated in malonyl coa carboxylase deficiency'	'Jones LL, McDonald DA, Borum PR. (2010). Progress in Lipid Research 49: 61-75'
C40CPT1	'C40CPT1'	'crn[c] + btcoa[c] <=> coa[c] + c4crn[c] '	'FAO'	Carnitine O-palmitoyltransferase 1, liver isoform,Carnitine O-palmitoyltransferase 1, muscle isoform,Carnitine O-palmitoyltransferase 1, brain isoform	'2.3.1.21'	4	'(1374.1 or 1375.1 or 126129.1)'	''	'PMID: 20591710, PMID: 18175080'
C4CRNCPT2	'C4CRNCPT2'	'coa[m] + c4crn[m] <=> btcoa[m] + crn[m] '	'FAO'	0	'2.3.1.21'	4	'1376.1'	'CPT-2 reaction'	'Biochemica et Biophysica Acta 1486(2000) 1-17, Eur. J. Biochem. 244, 1-14 (1997) FEBS 1997, Biochemica et Biophysica Acta 1546(2001) 21-43.'
C4CRNe	'C4CRNe'	'c4crn[c] -> c4crn[e] '	'FAO'	0	''	2	''	'elevated in SCAD, multiple coA dehydrogenase deficiency, GA-2, ethyl malonic encephalopathy, isobutyryl coa dehydrogenase deficiency, beta keto thiolase deficiency and formimino glutamic aciduria.'	'Jones LL, McDonald DA, Borum PR. (2010). Progress in Lipid Research 49: 61-75'
C4DCCACT	'C4DCCACT'	'c4dc[x] <=> c4dc[c] '	'FAO'	0	''	2	'788.1'	'acyl carnitines transported by CACT.'	'Westin M, Hunt M, Alexson S. (2008). Cellular and Molecular Life Sciences 65: 982-90. doi:10.1006/mgme.2000.3055,doi:10.1006/bbrc.1999.1340,biochimica et biophysica acta 1546 (2001) 21-43'
C4DCe	'C4DCe'	'c4dc[c] -> c4dc[e] '	'FAO'	0	''	2	''	'biomarker in methyl malonyl coA mutase deficiency'	'Vianey-Saban C, Guffon N, Delolne F, Guibaud P, Mathieu M, Divry P. (1997). Journal of Inherited Metabolic Disease 20: 411-4'
C4OHc	'C4OHc'	'crn[c] + 3hbcoa_R[c] <=> coa[c] + 3bcrn[c] '	'FAO'	Carnitine O-palmitoyltransferase 1, liver isoform,Carnitine O-palmitoyltransferase 1, muscle isoform,Carnitine O-palmitoyltransferase 1, brain isoform	'2.3.1.21'	4	'(1374.1 or 1375.1 or 126129.1)'	''	'PMID: 17442642'
C4tcx	'C4tcx'	'c4crn[x] <=> c4crn[c] '	'Transport, Peroxisomal'	Mitochondrial carnitine/acylcarnitine carrier protein	''	4	'788.1'	'should be noted that shortchain acylcarnitines are freely permeable accross membrane'	'biochimica et biophysica acta 1546(2001)21-43'
C4tmc	'C4tmc'	'c4crn[c] <=> c4crn[m] '	'transport, mitochondrial'	Mitochondrial carnitine/acylcarnitine carrier protein	''	4	'788.1'	''	'biochimica et biophysica acta 1546(2001)21-43'
C4x	'C4x'	'crn[x] + btcoa[x] <=> coa[x] + c4crn[x] '	'Transport, Peroxisomal'	Peroxisomal carnitine O-octanoyltransferase	'2.3.1.137'	4	'54677.1'	'crot shows activity for C6 to C10 fatty acylcoa, however some amont of activity for short chain fattyacylcoa also. The exit from peroxisomes can also be at the hexanoylcoa stage which is more frequently observed.however some levels of activity is also seen at the bytyrylcoa stage.'	'PMID: 11356164, the journal of biological chemistry volume280,no.1,issue of january,pp.738-744,2005'
C50CPT1	'C50CPT1'	'crn[c] + ivcoa[c] <=> coa[c] + ivcrn[c] '	'FAO, leucine metabolism'	Carnitine O-palmitoyltransferase 1, liver isoform,Carnitine O-palmitoyltransferase 1, muscle isoform,Carnitine O-palmitoyltransferase 1, brain isoform	'2.3.1.21'	4	'(1374.1 or 1375.1 or 126129.1)'	''	'PMID: 20807522, PMID: 20591710'
C51CPT1	'C51CPT1'	'crn[c] + 2mb2coa[c] <=> coa[c] + c51crn[c] '	'FAO, isoleucine metabolism'	Carnitine O-palmitoyltransferase 1, liver isoform,Carnitine O-palmitoyltransferase 1, muscle isoform,Carnitine O-palmitoyltransferase 1, brain isoform	'2.3.1.21'	4	'(1374.1 or 1375.1 or 126129.1)'	''	'PMID: 8930414, PMID: 14518824'
C5DCe	'C5DCe'	'c5dc[c] -> c5dc[e] '	'FAO'	0	''	2	''	'elevated in GA-1'	'Jones LL, McDonald DA, Borum PR. (2010). Progress in Lipid Research 49: 61-75'
C60CPT1	'C60CPT1'	'crn[c] + hxcoa[c] <=> coa[c] + c6crn[c] '	'FAO'	Carnitine O-palmitoyltransferase 1, liver isoform,Carnitine O-palmitoyltransferase 1, muscle isoform,Carnitine O-palmitoyltransferase 1, brain isoform	'2.3.1.21'	4	'(1374.1 or 1375.1 or 126129.1)'	''	'PMID: 8214594, PMID: 8496747, PMID: 8491807'
C6COAt	'C6COAt'	'crn[x] + hxcoa[x] <=> coa[x] + c6crn[x] '	'Transport, Peroxisomal'	Peroxisomal carnitine O-octanoyltransferase	'2.3.1.137'	4	'54677.1'	''	'the journal of biological chemistry,vol 280, no1,issue of january 7,pp 738-744,2005'
C6CRNe	'C6CRNe'	'c6crn[c] -> c6crn[e] '	'FAO'	0	''	2	''	'elevated in MCAD'	'Jones LL, McDonald DA, Borum PR. (2010). Progress in Lipid Research 49: 61-75'
C6CRNtcx	'C6CRNtcx'	'c6crn[x] <=> c6crn[c] '	'Transport, Peroxisomal'	Mitochondrial carnitine/acylcarnitine carrier protein	''	4	'788.1'	'short and medium chain acylcarnitines are also freely permeable accros the membrane.'	'biochimica et biophysica acta 1546(2001)21-43'
C6DCCACT	'C6DCCACT'	'c6dc[x] <=> c6dc[c] '	'FAO'	0	''	2	'788.1'	'acyl carnitines transported by CACT.'	'Westin M, Hunt M, Alexson S. (2008). Cellular and Molecular Life Sciences 65: 982-90. doi:10.1006/mgme.2000.3055,doi:10.1006/bbrc.1999.1340,biochimica et biophysica acta 1546 (2001) 21-43'
C6DCc	'C6DCc'	'crn[c] + adpcoa[c] <=> coa[c] + c6dc[c] '	'FAO'	Carnitine O-palmitoyltransferase 1, liver isoform,Carnitine O-palmitoyltransferase 1, muscle isoform,Carnitine O-palmitoyltransferase 1, brain isoform	'2.3.1.21'	4	'(1374.1 or 1375.1 or 126129.1)'	''	'doi:10.1016/j.physletb.2003.10.071'
C6DCe	'C6DCe'	'c6dc[c] -> c6dc[e] '	'FAO'	0	''	2	''	'elevated in HMG coA lyase deficiency'	'Jones LL, McDonald DA, Borum PR. (2010). Progress in Lipid Research 49: 61-75'
C80CPT1	'C80CPT1'	'crn[c] + occoa[c] <=> coa[c] + c8crn[c] '	'FAO'	Carnitine O-palmitoyltransferase 1, liver isoform,Carnitine O-palmitoyltransferase 1, muscle isoform,Carnitine O-palmitoyltransferase 1, brain isoform	'2.3.1.21'	4	'(1374.1 or 1375.1 or 126129.1)'	''	'PMID: 21083904, PMID: 20413428'
sink_c81coa	C81COASINK'	'c81coa[c] <=> '	'FAO'	0	''	1	''	''	''
C81CPT1	'C81CPT1'	'crn[c] + c81coa[c] <=> coa[c] + c81crn[c] '	'FAO'	Carnitine O-palmitoyltransferase 1, liver isoform,Carnitine O-palmitoyltransferase 1, muscle isoform,Carnitine O-palmitoyltransferase 1, brain isoform	'2.3.1.21'	4	'(1374.1 or 1375.1 or 126129.1)'	''	'Go Tajimaa et al,journal of chromatography B,volume 823,issue 2,5 September 2005, Pages 122-130 '
C81CRNe	'C81CRNe'	'c81crn[c] -> c81crn[e] '	'FAO'	0	''	2	''	'VLCAD biomarker C14:1/C8:1 in serum'	'Shigematsu Y, Hirano S, Hata I, Tanaka Y, Sudo M, et al. (2003). Journal of Chromatography B 792: 63-72'
C8CRNe	'C8CRNe'	'c8crn[c] -> c8crn[e] '	'FAO'	0	''	2	''	'elevated in MCAD'	'Jones LL, McDonald DA, Borum PR. (2010). Progress in Lipid Research 49: 61-75'
C8DCc	'C8DCc'	'crn[c] + sbcoa[c] <=> coa[c] + c8dc[c] '	'FAO'	Carnitine O-palmitoyltransferase 1, liver isoform,Carnitine O-palmitoyltransferase 1, muscle isoform,Carnitine O-palmitoyltransferase 1, brain isoform	'2.3.1.21'	4	'(1374.1 or 1375.1 or 126129.1)'	''	'doi:10.1016/j.physletb.2003.10.071'
C8DCe	'C8DCe'	'c8dc[c] -> c8dc[e] '	'FAO'	0	''	2	''	'elevated urinary levels in dicarboxylic aciduria'	'PMID: 6959231'
C9BRxtc	'C9BRxtc'	'dmnoncrn[x] <=> dmnoncrn[c] '	'Transport, Peroxisomal'	Mitochondrial carnitine/acylcarnitine carrier protein	''	4	'788.1'	'mentioned in recon1 as SCP22x. CACT activity has been reported in peroxisomes and they mediate transfer of acylcarnitine from peroxisomes to cytosol and then furher uptake into mitochondria.CACT are concentration dependant,uniport transporters acting in ping-pong mechanism. Synonym is CACT'	'doi:10.1006/mgme.2000.3055,doi:10.1006/bbrc.1999.1340,biochimica et biophysica acta 1546 (2001) 21-43'
DCATDc	'DCATDc'	'dca[e] <=> dca[c] '	'FAO'	0	''	2	''	'simple diffusion of fatty acids freely across membranes'	'Glatz JFC, Luiken JJFP, Bonen A. (2010). Physiological Reviews 90: 367-417, Kamp F, Hamilton JA. (2006). Prostaglandins, Leukotrienes and Essential Fatty Acids 75: 149-59, PMCID: PMC2785172, Evtodienko VY, Bondarenko DI, Antonenko YN. (1999). Biochimica et Biophysica Acta (BBA) - Biomembranes 1420: 95-103'
DCATDr	'DCATDr'	'dca[c] <=> dca[r] '	'FAO'	0	''	2	''	'simple diffusion of fatty acids freely across membranes'	'Glatz JFC, Luiken JJFP, Bonen A. (2010). Physiological Reviews 90: 367-417, Kamp F, Hamilton JA. (2006). Prostaglandins, Leukotrienes and Essential Fatty Acids 75: 149-59, PMCID: PMC2785172, Evtodienko VY, Bondarenko DI, Antonenko YN. (1999). Biochimica et Biophysica Acta (BBA) - Biomembranes 1420: 95-103'
DCSPTN1COAtxc	'DCSPTN1COAtxc'	'atp[c] + dcsptn1coa[c] + h2o[c] -> adp[c] + dcsptn1coa[x] + h[c] + pi[c] '	'Transport, Peroxisomal'	ATP-binding cassette sub-family D member 1,ATP-binding cassette sub-family D member 2	''	4	'(215.1 and 225.1)'	'mentioned in recon1 as DCSPTN1COAtx'	'PMID:18854420'
sink_dd2coa	DD2COASINK'	'dd2coa[c] <=> '	'FAO'	0	''	1	''	''	''
DDCRNe	'DDCRNe'	'3ddcrn[c] -> 3ddcrn[e] '	'FAO'	0	''	2	''	'increased amounts of C12OH in mouse brain in LCHAD.'	'PMCID: PMC1134946'
DDECCRNe	'DDECCRNe'	'ddeccrn[c] -> ddeccrn[e] '	'FAO'	0	''	2	''	'biomarker for VLCAD is C14:1/C12 ratio in blood. Mitochondrial origin has been assumed. Abnormal concentration in multiple acyl coa dehydrogenase deficiency, carnitine uptake defect and glutaric aciduria-2.'	'Sun W, Wang Y, Yang Y, Wang J, Cao Y, et al. (2011). Clinica Chimica Acta 412: 1270-4, PMID: 12828998, PMID: 9498103, Nagaraja D, Mamatha SN, De T, Christopher R. (2010). Clinical Biochemistry 43: 581-8'
DDECE1CRNe	'DDECE1CRNe'	'ddece1crn[c] -> ddece1crn[e] '	'FAO'	0	''	2	''	'abnormal in carnitine uptake defect.'	'Nagaraja D, Mamatha SN, De T, Christopher R. (2010). Clinical Biochemistry 43: 581-8'
DECCRNe	'DECCRNe'	'3deccrn[c] -> 3deccrn[e] '	'FAO'	0	''	2	''	'increased amounts in MCKAT and SCAD.'	'Jones LL, McDonald DA, Borum PR. (2010). Progress in Lipid Research 49: 61-75'
sink_decdicoa	DECDICOASINK'	'decdicoa[c] <=> '	'FAO'	0	''	1	''	''	''
DECDICRNe	'DECDICRNe'	'decdicrn[c] -> decdicrn[e] '	'FAO'	0	''	2	''	'blood levels measured for evaluating carnitine nutritional status and fatty acid and organic acid disorders'	'PMID: 21215187'
DOCO13ECOAtxc	'DOCO13ECOAtxc'	'atp[c] + h2o[c] + doco13ecoa[c] -> adp[c] + h[c] + pi[c] + doco13ecoa[x] '	'Transport, Peroxisomal'	ATP-binding cassette sub-family D member 1,ATP-binding cassette sub-family D member 2	''	4	'(215.1 and 225.1)'	''	'PMID:18854420'
DOCO13EFATP	'DOCO13EFATP'	'atp[c] + coa[c] + doco13ac[e] -> amp[c] + ppi[c] + doco13ecoa[c] '	'FAO'	Long-chain fatty acid transport protein 1 or Very long-chain acyl-CoA synthetase or Long-chain fatty acid transport protein 3 or Long-chain fatty acid transport protein 4 or Bile acyl-CoA synthetase or Long-chain fatty acid transport protein 6	'6.2.1.-, 6.2.1.3, 6.2.1.-, 6.2.1.-, 6.2.1.-, 6.2.1.7'	3	'(376497.1 or 11001.1 or 11000.1 or 10999.1 or 10998.1 or 28965.1)'	'fatty acid transport proteins mediate the uptake of long and very long chain fatty acids. These transport proteins are widely distributed and thought to possess fatty acid activating properties. May requires other proteins also.'	'PMID: 16868315, PMID: 17901542, journal of lipid research (2006) vol 47 page 665-672, 16357361, PMID: 17495600'
DOCOSACT	'DOCOSACT'	'atp[c] + coa[c] + docosac[c] -> amp[c] + ppi[c] + docoscoa[c] '	'FAO'	Long-chain-fatty-acid--CoA ligase ACSBG1 or Long-chain-fatty-acid--CoA ligase ACSBG2	'6.2.1.3'	2	'(23205.1 or 81616.1)'	'cytosolic long chain acyl coA synthatases, also found in E.R.'	'PMID: 16868315, PMID: 17762044'
DOCOSACTDe	'DOCOSACTDe'	'docosac[e] <=> docosac[c] '	'FAO'	0	''	2	''	'free fatty acids transported by simple diffusion, fatty acid transport proteins may be involved. Depends on the physiological concentration of these fatty acids.'	'PMID: 10331655, PMID: 11478366'
DOCOSACTDr	'DOCOSACTDr'	'docosac[c] <=> docosac[r] '	'FAO'	0	''	2	''	'free fatty acids transported by simple diffusion, fatty acid transport proteins may be involved. Depends on the physiological concentration of these fatty acids.'	'PMID: 10331655, PMID: 11478365'
DOCOSADIACTD	'DOCOSADIACTD'	'docosdiac[r] <=> docosdiac[c] '	'FAO'	0	''	2	''	'free fatty acids transported by simple diffusion, fatty acid transport proteins may be involved. Depends on the physiological concentration of these fatty acids.'	'PMID: 10331655, PMID: 11478366'
DOCOSCOAtxc	'DOCOSCOAtxc'	'atp[c] + h2o[c] + docoscoa[c] -> adp[c] + h[c] + pi[c] + docoscoa[x] '	'Transport, Peroxisomal'	ATP-binding cassette sub-family D member 1,ATP-binding cassette sub-family D member 2	''	4	'(215.1 and 225.1)'	''	'PMID:18854420'
DOCOSDIACTD	'DOCOSDIACTD'	'docosdiac[c] <=> docosdiac[e] '	'FAO'	0	''	2	''	'high levels may be excreted in urine in case of peroxisomal biogenesis disorders'	'PMID: 15716582'
EX_3BCRN	'EX_3BCRN'	'3bcrn[e] <=> '	'FAO'	0	''	1	''	''	''
EX_3DDCRN	'EX_3DDCRN'	'3ddcrn[e] <=> '	'FAO'	0	''	1	''	''	''
EX_3DECCRN	'EX_3DECCRN'	'3deccrn[e] <=> '	'FAO'	0	''	1	''	''	''
EX_3HDECECRN	'EX_3HDECECRN'	'3hdececrn[e] <=> '	'FAO'	0	''	1	''	''	''
EX_3HEXDCRN	'EX_3HEXDCRN'	'3hexdcrn[e] <=> '	'FAO'	0	''	1	''	''	''
EX_3IVCRN	'EX_3IVCRN'	'3ivcrn[e] <=> '	'FAO'	0	''	1	''	''	''
EX_3OCTDEC2CRN	'EX_3OCTDEC2CRN'	'3octdec2crn[e] <=> '	'FAO'	0	''	1	''	''	''
EX_3OCTDECCRN	'EX_3OCTDECCRN'	'3octdeccrn[e] <=> '	'FAO'	0	''	1	''	''	''
EX_3OCTDECE1CRN	'EX_3OCTDECE1CRN'	'3octdece1crn[e] <=> '	'FAO'	0	''	1	''	''	''
EX_3TDCRN	'EX_3TDCRN'	'3tdcrn[e] <=> '	'FAO'	0	''	1	''	''	''
EX_3TETD7ECOACRN	'EX_3TETD7ECOACRN'	'3tetd7ecoacrn[e] <=> '	'FAO'	0	''	1	''	''	''
EX_3THEXDDCOACRN	'EX_3THEXDDCOACRN'	'3thexddcoacrn[e] <=> '	'FAO'	0	''	1	''	''	''
EX_3TTETDDCOACRN	'EX_3TTETDDCOACRN'	'3ttetddcoacrn[e] <=> '	'FAO'	0	''	1	''	''	''
EX_C101CRN	'EX_C101CRN'	'c101crn[e] <=> '	'FAO'	0	''	1	''	''	''
EX_C10CRN	'EX_C10CRN'	'c10crn[e] <=> '	'FAO'	0	''	1	''	''	''
EX_C10DC	'EX_C10DC'	'c10dc[e] <=> '	'FAO'	0	''	1	''	''	''
EX_C12DC	'EX_C12DC'	'c12dc[e] <=> '	'FAO'	0	''	1	''	''	''
EX_C16DC	'EX_C16DC'	'c16dc[e] <=> '	'FAO'	0	''	1	''	''	''
EX_C3DC	'EX_C3DC'	'c3dc[e] <=> '	'FAO'	0	''	1	''	''	''
EX_C4CRN	'EX_C4CRN'	'c4crn[e] <=> '	'FAO'	0	''	1	''	''	''
EX_C4DC	'EX_C4DC'	'c4dc[e] <=> '	'FAO'	0	''	1	''	''	''
EX_C51CRN	'EX_C51CRN'	'c51crn[e] <=> '	'FAO'	0	''	1	''	''	''
EX_C5DC	'EX_C5DC'	'c5dc[e] <=> '	'FAO'	0	''	1	''	''	''
EX_C6CRN	'EX_C6CRN'	'c6crn[e] <=> '	'FAO'	0	''	1	''	''	''
EX_C6DC	'EX_C6DC'	'c6dc[e] <=> '	'FAO'	0	''	1	''	''	''
EX_C81CRN	'EX_C81CRN'	'c81crn[e] <=> '	'FAO'	0	''	1	''	''	''
EX_C8CRN	'EX_C8CRN'	'c8crn[e] <=> '	'FAO'	0	''	1	''	''	''
EX_C8DC	'EX_C8DC'	'c8dc[e] <=> '	'FAO'	0	''	1	''	''	''
EX_DDECE1CRN	'EX_DDECE1CRN'	'ddece1crn[e] <=> '	'FAO'	0	''	1	''	''	''
EX_DDECRN	'EX_DDECRN'	'ddeccrn[e] <=> '	'FAO'	0	''	1	''	''	''
EX_DECDICRN	'EX_DECDICRN'	'decdicrn[e] <=> '	'FAO'	0	''	1	''	''	''
EX_DOCO13AC	'EX_DOCO13AC'	'doco13ac[e] <=> '	'FAO'	0	''	1	''	''	''
EX_DOCOSAC	'EX_DOCOSAC'	'docosac[e] <=> '	'FAO'	0	''	1	''	''	''
EX_DOCOSDIAC	'EX_DOCOSDIAC'	'docosdiac[e] <=> '	'FAO'	0	''	1	''	''	''
EX_IVCRN	'EX_IVCRN'	'ivcrn[e] <=> '	'FAO'	0	''	1	''	''	''
EX_TDCRN	'EX_TDCRN'	'tdcrn[e] <=> '	'FAO'	0	''	1	''	''	''
EX_TETDEC2CRN	'EX_TETDEC2CRN'	'tetdec2crn[e] <=> '	'FAO'	0	''	1	''	''	''
EX_TETDECE1CRN	'EX_TETDECE1CRN'	'tetdece1crn[e] <=> '	'FAO'	0	''	1	''	''	''
EX_dca(e)	'EX_dca(e)'	'dca[e] <=> '	'FAO'	0	''	0	''	''	''
FAOXC101C102m	'FAOXC101C102m'	'fad[m] + dece4coa[m] -> fadh2[m] + dec24dicoa[m] '	'FAO'	Medium-chain specific acyl-CoA dehydrogenase, mitochondrial	'1.3.99.3'	4	'34.1'	'acyl coA dehydrogenase enzyme catalyzes this reaction in mitochondria.first step of beta oxidation'	'PMID: 15337167'
FAOXC101C102x	'FAOXC101C102x'	'o2[x] + dece4coa[x] -> h2o2[x] + dec24dicoa[x] '	'FAO'	Peroxisomal acyl-coenzyme A oxidase 1	'1.3.3.6'	4	'51.1'	'peroxisomal acyl coA oxidase reaction.'	'PMID: 18536048, PMID: 17458872'
FAOXC101C8m	'FAOXC101C8m'	'coa[m] + h2o[m] + nad[m] + dc2coa[m] -> accoa[m] + h[m] + nadh[m] + occoa[m] '	'FAO'	Enoyl-CoA hydratase, mitochondrial,Hydroxyacyl-coenzyme A dehydrogenase, mitochondrial,3-ketoacyl-CoA thiolase, mitochondrial	'4.2.1.17,1.1.1.35,2.3.1.16'	4	'(1892.1 and 3033.1 and 10449.1)'	''	'PMID:20195903, PMID:20490924, international journal of molecular medicine 19: 81-87, 2007.'
FAOXC101C8x	'FAOXC101C8x'	'coa[x] + h2o[x] + nad[x] + dc2coa[x] -> accoa[x] + h[x] + nadh[x] + occoa[x] '	'FAO'	Peroxisomal bifunctional enzyme,Peroxisomal multifunctional enzyme type 2,3-ketoacyl-CoA thiolase, peroxisomal	'4.2.1.17,1.1.1.35,2.3.1.16'	4	'(1962.1 and 3295.1 and 30.1)'	'peroxisomal beta oxidation reaction.'	'PMID:20558530'
FAOXC101m	'FAOXC101m'	'dece3coa[m] -> dc2coa[m] '	'FAO'	3,2-trans-enoyl-CoA isomerase, mitochondrial	'5.3.3.8'	4	'1632.1'	'delta3-cis->delta 2-trans isomerase'	'"Journal of Molecular Biology, Volume 342, Issue 4, 24 September 2004, Pages 1197-1208"'
FAOXC101x	'FAOXC101x'	'dece3coa[x] -> dc2coa[x] '	'FAO'	Peroxisomal bifunctional enzyme,Peroxisomal 3,2-trans-enoyl-CoA isomerase	'5.3.3.8'	4	'(1962.1 or 10455.1)'	'delta3-cis->delta 2-trans isomerase'	'PNAS August 1, 1992 vol. 89 no. 15 6673-6677,PMID: 2303409,PMID: 10419495, FEBS LETTERS vol.215 no.2 228-232'
FAOXC102C101m	'FAOXC102C101m'	'h[m] + nadph[m] + dec24dicoa[m] -> nadp[m] + dece3coa[m] '	'FAO'	2,4-dienoyl-CoA reductase, mitochondrial	'1.3.1.34'	4	'1666.1'	'2,4-dienoyl coA reductase catalyzes this reaction in mitochondria.'	'PMID: 7818482'
FAOXC102C101x	'FAOXC102C101x'	'h[x] + nadph[x] + dec24dicoa[x] -> nadp[x] + dece3coa[x] '	'FAO'	Peroxisomal 2,4-dienoyl-CoA reductase	'1.3.1.34'	4	'26063.1'	'2,4-dienoyl coA reductase'	'PMID: 11514237'
FAOXC102C103m	'FAOXC102C103m'	'fad[m] + dec47dicoa[m] -> fadh2[m] + dectricoa[m] '	'FAO'	Medium-chain specific acyl-CoA dehydrogenase, mitochondrial	'1.3.99.3'	4	'34.1'	''	'PMID: 15337167'
FAOXC102C103x	'FAOXC102C103x'	'o2[x] + dec47dicoa[x] -> h2o2[x] + dectricoa[x] '	'FAO'	Peroxisomal acyl-coenzyme A oxidase 1	'1.3.3.6'	4	'51.1'	'peroxisomal acyl coA oxidase reaction.'	'PMID: 18536048, PMID: 17458872'
FAOXC102C81m	'FAOXC102C81m'	'coa[m] + h2o[m] + nad[m] + 2decdicoa[m] -> accoa[m] + h[m] + nadh[m] + octe5coa[m] '	'FAO'	Enoyl-CoA hydratase, mitochondrial ,Hydroxyacyl-coenzyme A dehydrogenase, mitochondrial , 3-ketoacyl-CoA thiolase, mitochondrial	'4.2.1.17,1.1.1.35,2.3.1.16'	4	'(1892.1 and 3033.1 and 10449.1)'	''	'PMID:20195903, PMID:20490924, international journal of molecular medicine 19: 81-87, 2007.'
FAOXC102C81x	'FAOXC102C81x'	'coa[x] + h2o[x] + nad[x] + 2decdicoa[x] -> accoa[x] + h[x] + nadh[x] + octe5coa[x] '	'FAO'	Peroxisomal bifunctional enzyme,Peroxisomal multifunctional enzyme type 2,3-ketoacyl-CoA thiolase, peroxisomal	'4.2.1.17,1.1.1.35,2.3.1.16'	4	'(1962.1 and 3295.1 and 30.1)'	'peroxisomal beta oxidation reaction.'	'PMID:20558530'
FAOXC102m	'FAOXC102m'	'3decdicoa[m] -> 2decdicoa[m] '	'FAO'	3,2-trans-enoyl-CoA isomerase, mitochondrial	'5.3.3.8'	4	'1632.1'	'cis-delta3->trans-delta2 isomerase'	'"Journal of Molecular Biology, Volume 342, Issue 4, 24 September 2004, Pages 1197-1208"'
FAOXC102x	'FAOXC102x'	'3decdicoa[x] -> 2decdicoa[x] '	'FAO'	Peroxisomal bifunctional enzyme,Peroxisomal 3,2-trans-enoyl-CoA isomerase	'5.3.3.8'	4	'(1962.1 or 10455.1)'	'delta3-cis->delta 2-trans isomerase'	'PNAS August 1, 1992 vol. 89 no. 15 6673-6677,PMID: 2303409,PMID: 10419495, FEBS LETTERS vol.215 no.2 228-232'
FAOXC103C102m	'FAOXC103C102m'	'h[m] + nadph[m] + dectricoa[m] -> nadp[m] + 3decdicoa[m] '	'FAO'	2,4-dienoyl-CoA reductase, mitochondrial	'1.3.1.34'	4	'1666.1'	'2,4-dienoyl coA reductase'	'PMID: 7818482'
FAOXC103C102x	'FAOXC103C102x'	'h[x] + nadph[x] + dectricoa[x] -> nadp[x] + 3decdicoa[x] '	'FAO'	Peroxisomal 2,4-dienoyl-CoA reductase	'1.3.1.34'	4	'26063.1'	'2,4-dienoyl coA reductase'	'PMID: 11514237'
FAOXC10C10OHm	'FAOXC10C10OHm'	'fad[m] + h2o[m] + dcacoa[m] -> fadh2[m] + 3hdcoa[m] '	'FAO'	Medium-chain specific acyl-CoA dehydrogenase, mitochondrial and Enoyl-CoA hydratase, mitochondrial	'1.3.99.3,4.2.1.17'	4	'(34.1 and 1892.1)'	' PMID: 1730577.'	'PMID: 1730577,HMDB02203,PMID: 1912723,PMID: 7318031'
FAOXC10C8m	'FAOXC10C8m'	'coa[m] + fad[m] + h2o[m] + nad[m] + dcacoa[m] -> accoa[m] + fadh2[m] + h[m] + nadh[m] + occoa[m] '	'FAO'	Medium-chain specific acyl-CoA dehydrogenase, mitochondrial , Enoyl-CoA hydratase, mitochondrial ,Hydroxyacyl-coenzyme A dehydrogenase, mitochondrial , 3-ketoacyl-CoA thiolase, mitochondrial	'1.3.99.3,4.2.1.17,1.1.1.35,2.3.1.16'	4	'(34.1 and 1892.1 and 3033.1 and 10449.1)'	'mitochondrial beta oxidation.'	'PMID:20195903, PMID:20490924, international journal of molecular medicine 19: 81-87, 2007.'
FAOXC10C8x	'FAOXC10C8x'	'coa[x] + dcacoa[x] + h2o[x] + nad[x] + o2[x] -> accoa[x] + h2o2[x] + h[x] + nadh[x] + occoa[x] '	'FAO'	Peroxisomal acyl-coenzyme A oxidase 1,Peroxisomal bifunctional enzyme,Peroxisomal multifunctional enzyme type 2,3-ketoacyl-CoA thiolase, peroxisomal	'1.3.3.6,4.2.1.17,1.1.1.35,2.3.1.16'	4	'(51.1 and 1962.1 and 3295.1 and 30.1)'	'CPT1,CACT and CPT2 in mitochondria then tranports it to mitochondrial matrix where it is further oxidized.'	'PMID: 11411544, HMDB01070'
FAOXC10DCC8DCx	'FAOXC10DCC8DCx'	'coa[x] + h2o[x] + nad[x] + o2[x] + sebcoa[x] -> accoa[x] + h2o2[x] + h[x] + nadh[x] + sbcoa[x] '	'FAO'	Peroxisomal acyl-coenzyme A oxidase 1,Peroxisomal bifunctional enzyme,Peroxisomal multifunctional enzyme type 2,3-ketoacyl-CoA thiolase, peroxisomal	'1.3.3.6,4.2.1.17,1.1.1.35,2.3.1.16'	4	'(51.1 and 1962.1 and 3295.1 and 30.1)'	''	'PMID:15060085,PMID:9827430'
FAOXC11BRC9BRx	'FAOXC11BRC9BRx'	'coa[x] + h2o[x] + nad[x] + o2[x] + tmuncoa[x] -> dmnoncoa[x] + h2o2[x] + h[x] + nadh[x] + ppcoa[x] '	'FAO'	Peroxisomal acyl-coenzyme A oxidase 3,Peroxisomal bifunctional enzyme,Peroxisomal multifunctional enzyme type 2,3-ketoacyl-CoA thiolase, peroxisomal	'1.3.3.6,4.2.1.17,1.1.1.35,2.3.1.16'	4	'(8310.1 and 1962.1 and 3295.1 and 30.1)'	'In Recon 1, the neutral formula for dmnoncoa should be corrected to C32H56N7O17P3S (HMDB11604) and charged formula to C32H52N7O17P3S with -4 as the charge. Therefore the reaction appears unbalanced here. '	'HMDB06202,PMID:11591435'
FAOXC11C9m	'FAOXC11C9m'	'coa[m] + fad[m] + h2o[m] + nad[m] + undcoa[m] -> accoa[m] + fadh2[m] + h[m] + nadh[m] + noncoa[m] '	'FAO'	Medium-chain specific acyl-CoA dehydrogenase, mitochondrial , Enoyl-CoA hydratase, mitochondrial ,Hydroxyacyl-coenzyme A dehydrogenase, mitochondrial , 3-ketoacyl-CoA thiolase, mitochondrial	'1.3.99.3,4.2.1.17,1.1.1.35,2.3.1.16'	4	'(34.1 and 1892.1 and 3033.1 and 10449.1)'	'mitochondrial beta oxidation of odd chain fatty acids.'	'J. Oleo Sci. 57, (5) 293-299 (2008), HMDB00847'
FAOXC121C101m	'FAOXC121C101m'	'coa[m] + fad[m] + h2o[m] + nad[m] + dd5ecoa[m] -> accoa[m] + fadh2[m] + h[m] + nadh[m] + dece3coa[m] '	'FAO'	Medium-chain specific acyl-CoA dehydrogenase, mitochondrial , Enoyl-CoA hydratase, mitochondrial ,Hydroxyacyl-coenzyme A dehydrogenase, mitochondrial , 3-ketoacyl-CoA thiolase, mitochondrial	'1.3.99.3,4.2.1.17,1.1.1.35,2.3.1.16'	4	'(34.1 and 1892.1 and 3033.1 and 10449.1)'	'mitochondrial beta oxidation'	'PMID:20195903, PMID:20490924, international journal of molecular medicine 19: 81-87, 2007.'
FAOXC121C10x	'FAOXC121C10x'	'coa[x] + h2o[x] + nad[x] + dd2coa[x] -> accoa[x] + dcacoa[x] + h[x] + nadh[x] '	'FAO'	Peroxisomal bifunctional enzyme,Peroxisomal multifunctional enzyme type 2,3-ketoacyl-CoA thiolase, peroxisomal	'4.2.1.17,1.1.1.35,2.3.1.16'	4	'(1962.1 and 3295.1 and 30.1)'	''	'PMID: 10709653, PMID: 11296696, PMID: 11330072, PMID: 16766224'
FAOXC121x	'FAOXC121x'	'dd3coa[x] -> dd2coa[x] '	'FAO'	Peroxisomal bifunctional enzyme,Peroxisomal 3,2-trans-enoyl-CoA isomerase	'5.3.3.8'	4	'(1962.1 or 10455.1)'	''	'PNAS August 1, 1992 vol. 89 no. 15 6673-6677,PMID: 2303409,PMID: 10419495, FEBS LETTERS vol.215 no.2 228-232'
FAOXC122C101m	'FAOXC122C101m'	'coa[m] + h2o[m] + nad[m] + 2ddecdicoa[m] -> accoa[m] + h[m] + nadh[m] + dece4coa[m] '	'FAO'	Enoyl-CoA hydratase, mitochondrial,Hydroxyacyl-coenzyme A dehydrogenase, mitochondrial,3-ketoacyl-CoA thiolase, mitochondrial	'4.2.1.17,1.1.1.35,2.3.1.16'	4	'(1892.1 and 3033.1 and 10449.1)'	'one cycle of beta oxidation occurs in mitochondria'	'PMID:20195903, PMID:20490924, international journal of molecular medicine 19: 81-87, 2007.'
FAOXC122m	'FAOXC122m'	'3ddecdicoa[m] -> 2ddecdicoa[m] '	'FAO'	3,2-trans-enoyl-CoA isomerase, mitochondrial	'5.3.3.8'	4	'1632.1'	'delta3-cis/trans-->delta2-trans-enoyl coA isomerase enzyme catalyzes this reaction in mitochondria.'	'"Journal of Molecular Biology, Volume 342, Issue 4, 24 September 2004, Pages 1197-1208"'
FAOXC122x	'FAOXC122x'	'3ddecdicoa[x] -> 2ddecdicoa[x] '	'FAO'	Peroxisomal bifunctional enzyme,Peroxisomal 3,2-trans-enoyl-CoA isomerase	'5.3.3.8'	4	'(1962.1 or 10455.1)'	'delta3-cis->delta 2-trans isomerase'	'PNAS August 1, 1992 vol. 89 no. 15 6673-6677,PMID: 2303409,PMID: 10419495, FEBS LETTERS vol.215 no.2 228-232'
FAOXC123C102m	'FAOXC123C102m'	'coa[m] + h2o[m] + nad[m] + 2dodtricoa[m] -> accoa[m] + h[m] + nadh[m] + dec47dicoa[m] '	'FAO'	Enoyl-CoA hydratase, mitochondrial ,Hydroxyacyl-coenzyme A dehydrogenase, mitochondrial , 3-ketoacyl-CoA thiolase, mitochondrial	'4.2.1.17,1.1.1.35,2.3.1.16'	4	'(1892.1 and 3033.1 and 10449.1)'	''	'PMID:20195903, PMID:20490924, international journal of molecular medicine 19: 81-87, 2007.'
FAOXC123C102x	'FAOXC123C102x'	'coa[x] + h2o[x] + nad[x] + 2dodtricoa[x] -> accoa[x] + h[x] + nadh[x] + dec47dicoa[x] '	'FAO'	Peroxisomal bifunctional enzyme,Peroxisomal multifunctional enzyme type 2,3-ketoacyl-CoA thiolase, peroxisomal	'4.2.1.17,1.1.1.35,2.3.1.16'	4	'(1962.1 and 3295.1 and 30.1)'	'beta oxidation'	'PMID:20558530, PMID:20064629'
FAOXC123m	'FAOXC123m'	'3dodtricoa[m] -> 2dodtricoa[m] '	'FAO'	3,2-trans-enoyl-CoA isomerase, mitochondrial	'5.3.3.8'	4	'1632.1'	'cis-delta3->trans-delta2 isomerase'	'"Journal of Molecular Biology, Volume 342, Issue 4, 24 September 2004, Pages 1197-1208"'
FAOXC123x	'FAOXC123x'	'3dodtricoa[x] -> 2dodtricoa[x] '	'FAO'	Peroxisomal bifunctional enzyme,Peroxisomal 3,2-trans-enoyl-CoA isomerase	'5.3.3.8'	4	'(1962.1 or 10455.1)'	'delta-3-cis-delta2-trans isomerase'	'PNAS August 1, 1992 vol. 89 no. 15 6673-6677,PMID: 2303409,PMID: 10419495, FEBS LETTERS vol.215 no.2 228-232'
FAOXC12C10m	'FAOXC12C10m'	'coa[m] + fad[m] + h2o[m] + nad[m] + ddcacoa[m] -> accoa[m] + fadh2[m] + h[m] + nadh[m] + dcacoa[m] '	'FAO'	Medium-chain specific acyl-CoA dehydrogenase, mitochondrial , Enoyl-CoA hydratase, mitochondrial ,Hydroxyacyl-coenzyme A dehydrogenase, mitochondrial ,3-ketoacyl-CoA thiolase, mitochondrial	'1.3.99.3,4.2.1.17,1.1.1.35,2.3.1.16'	4	'(34.1 and 1892.1 and 3033.1 and 10449.1)'	'mitochondrial beta oxidation.'	'PMID:20195903, PMID:20490924, international journal of molecular medicine 19: 81-87, 2007.'
FAOXC12C10x	'FAOXC12C10x'	'coa[x] + ddcacoa[x] + h2o[x] + nad[x] + o2[x] -> accoa[x] + dcacoa[x] + h2o2[x] + h[x] + nadh[x] '	'FAO'	Peroxisomal acyl-coenzyme A oxidase 1,Peroxisomal bifunctional enzyme,Peroxisomal multifunctional enzyme type 2,3-ketoacyl-CoA thiolase, peroxisomal	'1.3.3.6,4.2.1.17,1.1.1.35,2.3.1.16'	4	'(51.1 and 1962.1 and 3295.1 and 30.1)'	'after this stage,the activated fatty acid is transported to mitochondria,carnitine helps in the export.'	'PMID: 11411544, HMDB06404'
FAOXC12C12OHm	'FAOXC12C12OHm'	'fad[m] + h2o[m] + ddcacoa[m] -> fadh2[m] + 3hddcoa[m] '	'FAO'	Medium-chain specific acyl-CoA dehydrogenase, mitochondrial and Enoyl-CoA hydratase, mitochondrial	'1.3.99.3,4.2.1.17'	4	'(34.1 and 1892.1)'	''	'PMID: 1730577, HMDB00387'
FAOXC12DCC10DCx	'FAOXC12DCC10DCx'	'coa[x] + h2o[x] + nad[x] + o2[x] + c12dccoa[x] -> accoa[x] + h2o2[x] + h[x] + nadh[x] + sebcoa[x] '	'FAO'	Peroxisomal acyl-coenzyme A oxidase 1,Peroxisomal bifunctional enzyme,Peroxisomal multifunctional enzyme type 2,3-ketoacyl-CoA thiolase, peroxisomal	'1.3.3.6,4.2.1.17,1.1.1.35,2.3.1.16'	4	'(51.1 and 1962.1 and 3295.1 and 30.1)'	''	'PMID:15060085,PMID:9827430,The Tohoku Journal of Experimental Medicine.Vol. 221 (2010) , No. 3 pp.191-195'
FAOXC12DCTc	'FAOXC12DCTc'	'c12dc[x] <=> c12dc[c] '	'FAO'	0	''	2	'788.1'	'acyl carnitines transported by CACT.'	'Westin M, Hunt M, Alexson S. (2008). Cellular and Molecular Life Sciences 65: 982-90. doi:10.1006/mgme.2000.3055,doi:10.1006/bbrc.1999.1340,biochimica et biophysica acta 1546 (2001) 21-43'
FAOXC12DCc	'FAOXC12DCc'	'crn[c] + c12dccoa[c] <=> coa[c] + c12dc[c] '	'FAO'	0	'2.3.1.21'	4	'(1374.1 or 1375.1 or 126129.1)'	'elevated in urine in C-12 dicarboxylic aciduria '	'Korman SH, Waterham HR, Gutman A, Jakobs C, Wanders RJA. (2005). Molecular Genetics and Metabolism 86: 337-43'
FAOXC12DCx	'FAOXC12DCx'	'crn[x] + c12dccoa[x] <=> coa[x] + c12dc[x] '	'FAO'	0	'2.3.1.137'	3	'54677.1'	'alternatively peroxisomal carnitine O-octanoyltransferase may convert adipoyl coa into adipoyl carnitine and excreted out. Thioesterases and CRAT/CROT show same substrate specificty and similar Vmax and Km values, however author suggested there is no competition as they are expressed differentially in different tissues.'	'PMID: 15060085, Westin M, Hunt M, Alexson S. (2008). Cellular and Molecular Life Sciences 65: 982-90, PMID: 20560540'
FAOXC13BRC11BRx	'FAOXC13BRC11BRx'	'coa[x] + h2o[x] + nad[x] + o2[x] + tmtrdcoa[x] -> accoa[x] + h2o2[x] + h[x] + nadh[x] + tmuncoa[x] '	'FAO'	Peroxisomal acyl-coenzyme A oxidase 3,Peroxisomal bifunctional enzyme,Peroxisomal multifunctional enzyme type 2,3-ketoacyl-CoA thiolase, peroxisomal	'1.3.3.6,4.2.1.17,1.1.1.35,2.3.1.16'	4	'(8310.1 and 1962.1 and 3295.1 and 30.1)'	''	'HMDB02221,PMID:11591435'
FAOXC13C11m	'FAOXC13C11m'	'coa[m] + fad[m] + h2o[m] + nad[m] + tridcoa[m] -> accoa[m] + fadh2[m] + h[m] + nadh[m] + undcoa[m] '	'FAO'	Very long-chain specific acyl-CoA dehydrogenase, mitochondrial , Trifunctional enzyme subunit alpha, mitochondrial , Trifunctional enzyme subunit beta, mitochondrial	'1.3.99.-,4.2.1.17,1.1.1.211,2.3.1.16'	4	'(37.1 and 3030.1 and 3032.1)'	'mitochondrial beta oxidation of odd chain fatty acids.'	'J. Oleo Sci. 57, (5) 293-299 (2008)'
FAOXC141C121m	'FAOXC141C121m'	'coa[m] + fad[m] + h2o[m] + nad[m] + tetd7ecoa[m] -> accoa[m] + fadh2[m] + h[m] + nadh[m] + dd5ecoa[m] '	'FAO'	Very long-chain specific acyl-CoA dehydrogenase, mitochondrial , Trifunctional enzyme subunit alpha, mitochondrial , Trifunctional enzyme subunit beta, mitochondrial	'1.3.99.-,4.2.1.17,1.1.1.211,2.3.1.16'	4	'(37.1 and 3030.1 and 3032.1)'	'mitochondrial beta oxidation'	'PMID:20195903, PMID:20490924, international journal of molecular medicine 19: 81-87, 2007.'
FAOXC141C121x	'FAOXC141C121x'	'coa[x] + h2o[x] + nad[x] + o2[x] + tetde5coa[x] -> accoa[x] + h2o2[x] + h[x] + nadh[x] + dd3coa[x] '	'FAO'	Peroxisomal acyl-coenzyme A oxidase 1,Peroxisomal bifunctional enzyme,Peroxisomal multifunctional enzyme type 2,3-ketoacyl-CoA thiolase, peroxisomal	'1.3.3.6,4.2.1.17,1.1.1.35,2.3.1.16'	4	'(51.1 and 1962.1 and 3295.1 and 30.1)'	''	'PMID: 10709653, PMID: 11296696, PMID: 11330072, PMID: 16766224'
FAOXC141C141OHm	'FAOXC141C141OHm'	'fad[m] + h2o[m] + tetd7ecoa[m] -> fadh2[m] + 3tetd7ecoa[m] '	'FAO'	0	'1.3.99.-,4.2.1.17'	2	'(37.1 and 3030.1)'	''	'PMID: 21281499'
FAOXC142C122m	'FAOXC142C122m'	'coa[m] + fad[m] + h2o[m] + nad[m] + tetdecdicoa[m] -> accoa[m] + fadh2[m] + h[m] + nadh[m] + 3ddecdicoa[m] '	'FAO'	Very long-chain specific acyl-CoA dehydrogenase, mitochondrial , Trifunctional enzyme subunit alpha, mitochondrial ,Trifunctional enzyme subunit beta, mitochondrial	'1.3.99.-,4.2.1.17,1.1.1.211,2.3.1.16'	4	'(37.1 and 3030.1 and 3032.1)'	''	'PMID:20195903, PMID:20490924, international journal of molecular medicine 19: 81-87, 2007.'
FAOXC142C122x	'FAOXC142C122x'	'coa[x] + h2o[x] + nad[x] + o2[x] + tetdecdicoa[x] -> accoa[x] + h2o2[x] + h[x] + nadh[x] + 3ddecdicoa[x] '	'FAO'	Peroxisomal acyl-coenzyme A oxidase 1,Peroxisomal bifunctional enzyme,Peroxisomal multifunctional enzyme type 2,3-ketoacyl-CoA thiolase, peroxisomal	'1.3.3.6,4.2.1.17,1.1.1.35,2.3.1.16'	4	'(51.1 and 1962.1 and 3295.1 and 30.1)'	'peroxisomal beta oxidation reaction'	'PMID:20558530'
FAOXC142C142OHm	'FAOXC142C142OHm'	'fad[m] + h2o[m] + ttetddcoa[m] -> fadh2[m] + 3ttetddcoa[m] '	'FAO'	0	'1.3.99.-,4.2.1.17'	2	'(37.1 and 3030.1)'	''	'PMID: 21281499'
FAOXC143C123m	'FAOXC143C123m'	'coa[m] + fad[m] + h2o[m] + nad[m] + 5tedtricoa[m] -> accoa[m] + fadh2[m] + h[m] + nadh[m] + 3dodtricoa[m] '	'FAO'	Very long-chain specific acyl-CoA dehydrogenase, mitochondrial , Trifunctional enzyme subunit alpha, mitochondrial , Trifunctional enzyme subunit beta, mitochondria	'1.3.99.- , 4.2.1.17 , 1.1.1.211 , 2.3.1.16'	4	'(37.1 and 3030.1 and 3032.1)'	''	'PMID:20195903, PMID:20490924, international journal of molecular medicine 19: 81-87, 2007.'
FAOXC143C123x	'FAOXC143C123x'	'coa[x] + h2o[x] + nad[x] + o2[x] + 5tedtricoa[x] -> accoa[x] + h2o2[x] + h[x] + nadh[x] + 3dodtricoa[x] '	'FAO'	Peroxisomal acyl-coenzyme A oxidase 1,Peroxisomal bifunctional enzyme,Peroxisomal multifunctional enzyme type 2,3-ketoacyl-CoA thiolase, peroxisomal	'1.3.3.6,4.2.1.17,1.1.1.35,2.3.1.16'	4	'(51.1 and 1962.1 and 3295.1 and 30.1)'	'peroxisomal beta oxidation reaction.'	'PMID:20558530'
FAOXC14C12m	'FAOXC14C12m'	'coa[m] + fad[m] + h2o[m] + nad[m] + tdcoa[m] -> accoa[m] + fadh2[m] + h[m] + nadh[m] + ddcacoa[m] '	'FAO'	Very long-chain specific acyl-CoA dehydrogenase, mitochondrial,Trifunctional enzyme subunit alpha, mitochondrial,Trifunctional enzyme subunit beta, mitochondrial	'1.3.99.-,4.2.1.17,1.1.1.211,2.3.1.16'	4	'(37.1 and 3030.1 and 3032.1)'	'mitochondrial beta oxidation.'	'PMID:20195903, PMID:20490924, international journal of molecular medicine 19: 81-87, 2007.'
FAOXC14C12x	'FAOXC14C12x'	'coa[x] + h2o[x] + nad[x] + o2[x] + tdcoa[x] -> accoa[x] + ddcacoa[x] + h2o2[x] + h[x] + nadh[x] '	'FAO'	Peroxisomal acyl-coenzyme A oxidase 1,Peroxisomal bifunctional enzyme,Peroxisomal multifunctional enzyme type 2,3-ketoacyl-CoA thiolase, peroxisomal	'1.3.3.6,4.2.1.17,1.1.1.35,2.3.1.16'	4	'(51.1 and 1962.1 and 3295.1 and 30.1)'	'the peroxosomal enzymes i.e acyl coA oxidases are specific for C6 or C4 acyl coA.'	'PMID: 11411544'
FAOXC14C14OHm	'FAOXC14C14OHm'	'fad[m] + h2o[m] + tdcoa[m] -> fadh2[m] + 3htdcoa[m] '	'FAO'	Very long-chain specific acyl-CoA dehydrogenase, mitochondrial and Long-chain enoyl-CoA hydratase	'1.3.99.-,4.2.1.17'	4	'(37.1 and 3030.1)'	''	'PMID: 11427448'
FAOXC14DCC12DCx	'FAOXC14DCC12DCx'	'coa[x] + h2o[x] + nad[x] + o2[x] + c14dccoa[x] -> accoa[x] + h2o2[x] + h[x] + nadh[x] + c12dccoa[x] '	'FAO'	Peroxisomal acyl-coenzyme A oxidase 1,Peroxisomal bifunctional enzyme,Peroxisomal multifunctional enzyme type 2,3-ketoacyl-CoA thiolase, peroxisomal	'1.3.3.6,4.2.1.17,1.1.1.35,2.3.1.16'	4	'(51.1 and 1962.1 and 3295.1 and 30.1)'	'as a C3DC.HMDB02095,PMID: 12651823'	'PMID:15060085,PMID:9827430, HMDB02095,PMID: 12651823'
FAOXC15ATPx	'FAOXC15ATPx'	'atp[x] + coa[x] + prist[x] -> amp[x] + ppi[x] + pristcoa[x] '	'FAO'	Very long-chain acyl-CoA synthetase	'6.2.1.-'	4	'11001.1'	'PMID:11591435'	'PMID:11591435,PMID: 10198260'
FAOXC15BRC13BRx	'FAOXC15BRC13BRx'	'coa[x] + h2o[x] + nad[x] + o2[x] + pristcoa[x] -> h2o2[x] + h[x] + nadh[x] + ppcoa[x] + tmtrdcoa[x] '	'FAO'	Peroxisomal acyl-coenzyme A oxidase 3,Peroxisomal bifunctional enzyme,Peroxisomal multifunctional enzyme type 2,3-ketoacyl-CoA thiolase, peroxisomal	'1.3.3.6,4.2.1.17,1.1.1.35,2.3.1.16'	2	'(8310.1 and 1962.1 and 3295.1 and 30.1)'	''	'HMDB02396,PMID:11591435'
FAOXC15C13m	'FAOXC15C13m'	'coa[m] + fad[m] + h2o[m] + nad[m] + ptdcacoa[m] -> accoa[m] + fadh2[m] + h[m] + nadh[m] + tridcoa[m] '	'FAO'	Very long-chain specific acyl-CoA dehydrogenase, mitochondrial ,Trifunctional enzyme subunit alpha, mitochondrial ,Trifunctional enzyme subunit beta, mitochondrial	'1.3.99.-,4.2.1.17,1.1.1.211,2.3.1.16'	4	'(37.1 and 3030.1 and 3032.1)'	'mitochondrial beta oxidation of odd chain fatty acids.'	'J. Oleo Sci. 57, (5) 293-299 (2008)'
FAOXC15NADPx	'FAOXC15NADPx'	'h2o[x] + nadp[x] + phyt2ohcoa[x] -> formcoa[x] + 2 h[x] + nadph[x] + prist[x] '	'FAO'	2-hydroxyacyl-CoA lyase 1,Fatty aldehyde dehydrogenase	'4.1.-.-,1.2.1.3'	4	'(26061.1 and 224.1)'	'PMID: 11356164-alpha oxidation of phytanic acid in peroxisome.pristanic acid is then activated and undergoes two cycles of beta oxidation to produce 3 acetyl coA,3 propionyl coA and dimethyl nonoyl coA. This reaction can use either nadp/nad. One molecule of water at the reactant side and one proton to the product side have been added for elemental balancing.'	'PMID: 11356164, PMID: 8144536'
FAOXC15NADx	'FAOXC15NADx'	'h2o[x] + nad[x] + phyt2ohcoa[x] -> formcoa[x] + 2 h[x] + nadh[x] + prist[x] '	'FAO'	2-hydroxyacyl-CoA lyase 1,Fatty aldehyde dehydrogenase	'4.1.-.-,1.2.1.3'	4	'(26061.1 and 224.1)'	'PMID: 11356164-alpha oxidation of phytanic acid in peroxisome.pristanic acid is then activated and undergoes two cycles of beta oxidation to produce 3 acetyl coA,3 propionyl coA and dimethyl nonoyl coA. This reaction can use either nadp/nad. One molecule of water at the reactant side and one proton to the product side have been added for elemental balancing.'	'PMID:11591435'
FAOXC161C141m	'FAOXC161C141m'	'coa[m] + fad[m] + h2o[m] + hdcoa[m] + nad[m] -> accoa[m] + fadh2[m] + h[m] + nadh[m] + tetd7ecoa[m] '	'FAO'	Very long-chain specific acyl-CoA dehydrogenase, mitochondrial , Trifunctional enzyme subunit alpha, mitochondrial,Trifunctional enzyme subunit beta, mitochondrial	'1.3.99.-,4.2.1.17,1.1.1.211,2.3.1.16'	4	'(37.1 and 3030.1 and 3032.1)'	'mitochondrial beta oxidation'	'PMID:20195903, PMID:20490924, international journal of molecular medicine 19: 81-87, 2007.'
FAOXC161C141x	'FAOXC161C141x'	'coa[x] + h2o[x] + nad[x] + o2[x] + hexde7coa[x] -> accoa[x] + h2o2[x] + h[x] + nadh[x] + tetde5coa[x] '	'FAO'	Peroxisomal acyl-coenzyme A oxidase 1,Peroxisomal bifunctional enzyme,Peroxisomal multifunctional enzyme type 2,3-ketoacyl-CoA thiolase, peroxisomal	'1.3.3.6,4.2.1.17,1.1.1.35,2.3.1.16'	4	'(51.1 and 1962.1 and 3295.1 and 30.1)'	''	'PMID: 10709653, PMID: 11296696, PMID: 11330072, PMID: 16766224'
FAOXC161C161OHm	'FAOXC161C161OHm'	'fad[m] + h2o[m] + hdcoa[m] -> fadh2[m] + 3hdeccoa[m] '	'FAO'	Very long-chain specific acyl-CoA dehydrogenase, mitochondrial and Long-chain enoyl-CoA hydratase	'1.3.99.-,4.2.1.17'	4	'(37.1 and 3030.1)'	''	'PMID: 9510849, clinical chemistry 46:2, 149-155(2000)'
FAOXC162C142m	'FAOXC162C142m'	'coa[m] + fad[m] + h2o[m] + nad[m] + hexddcoa[m] -> accoa[m] + fadh2[m] + h[m] + nadh[m] + tetdecdicoa[m] '	'FAO'	Very long-chain specific acyl-CoA dehydrogenase, mitochondrial , Trifunctional enzyme subunit alpha, mitochondrial ,Trifunctional enzyme subunit beta, mitochondrial	'1.3.99.-,4.2.1.17,1.1.1.211,2.3.1.16'	4	'(37.1 and 3030.1 and 3032.1)'	''	'PMID:20195903, PMID:20490924, international journal of molecular medicine 19: 81-87, 2007.'
FAOXC162C162OHm	'FAOXC162C162OHm'	'fad[m] + h2o[m] + thexddcoa[m] -> fadh2[m] + 3thexddcoa[m] '	'FAO'	0	'1.3.99.-,4.2.1.17'	2	'(37.1 and 3030.1)'	''	'PMID: 21281499'
FAOXC163C142x	'FAOXC163C142x'	'coa[x] + h2o[x] + nad[x] + 2hexdtricoa[x] -> accoa[x] + h[x] + nadh[x] + tetdecdicoa[x] '	'FAO'	Peroxisomal bifunctional enzyme,Peroxisomal multifunctional enzyme type 2,3-ketoacyl-CoA thiolase, peroxisomal	'4.2.1.17,1.1.1.35,2.3.1.16'	4	'(1962.1 and 3295.1 and 30.1)'	'peroxisomal beta oxidation reaction'	'PMID:20558530'
FAOXC163C143m	'FAOXC163C143m'	'coa[m] + fad[m] + h2o[m] + nad[m] + hexdtrcoa[m] -> accoa[m] + fadh2[m] + h[m] + nadh[m] + 5tedtricoa[m] '	'FAO'	Very long-chain specific acyl-CoA dehydrogenase, mitochondrial , Trifunctional enzyme subunit alpha, mitochondrial , Trifunctional enzyme subunit beta, mitochondria	'1.3.99.- , 4.2.1.17 , 1.1.1.211 , 2.3.1.16'	4	'(37.1 and 3030.1 and 3032.1)'	''	'PMID:20195903, PMID:20490924, international journal of molecular medicine 19: 81-87, 2007.'
FAOXC163C164Gm	'FAOXC163C164Gm'	'fad[m] + 4hexdtricoa[m] -> fadh2[m] + hexdectecoa[m] '	'FAO'	Very long-chain specific acyl-CoA dehydrogenase, mitochondrial	'1.3.99.-'	4	'37.1'	''	'PMCID: PMC2702680'
FAOXC163C164x	'FAOXC163C164x'	'o2[x] + 4hexdtricoa[x] -> h2o2[x] + hexdectecoa[x] '	'FAO'	Peroxisomal acyl-coenzyme A oxidase 1	'1.3.3.6'	4	'51.1'	'peroxisomal acyl coA oxidase reaction.'	'PMID: 18536048, PMID: 17458872'
FAOXC163GC142m	'FAOXC163GC142m'	'coa[m] + h2o[m] + nad[m] + 2hexdtricoa[m] -> accoa[m] + h[m] + nadh[m] + tetdecdicoa[m] '	'FAO'	Trifunctional enzyme subunit alpha, mitochondrial , Trifunctional enzyme subunit beta, mitochondrial	'4.2.1.17,1.1.1.211,2.3.1.16'	4	'(3030.1 and 3032.1)'	''	'PMID:20195903, PMID:20490924, international journal of molecular medicine 19: 81-87, 2007.'
FAOXC163Gm	'FAOXC163Gm'	'3hexdtricoa[m] -> 2hexdtricoa[m] '	'FAO'	3,2-trans-enoyl-CoA isomerase, mitochondrial	'5.3.3.8'	4	'1632.1'	''	'"Journal of Molecular Biology, Volume 342, Issue 4, 24 September 2004, Pages 1197-1208"'
FAOXC163x	'FAOXC163x'	'3hexdtricoa[x] -> 2hexdtricoa[x] '	'FAO'	Peroxisomal bifunctional enzyme,Peroxisomal 3,2-trans-enoyl-CoA isomerase	'5.3.3.8'	4	'(1962.1 or 10455.1)'	'delta3-cis->delta 2-trans isomerase'	'PNAS August 1, 1992 vol. 89 no. 15 6673-6677,PMID: 2303409,PMID: 10419495, FEBS LETTERS vol.215 no.2 228-232'
FAOXC164C143m	'FAOXC164C143m'	'coa[m] + h2o[m] + nad[m] + 2hexdtetcoa[m] -> accoa[m] + h[m] + nadh[m] + 5tedtricoa[m] '	'FAO'	Trifunctional enzyme subunit alpha, mitochondrial , Trifunctional enzyme subunit beta, mitochondrial	'4.2.1.17,1.1.1.211,2.3.1.16'	4	'(3030.1 and 3032.1)'	'beta oxidation'	'PMID:20195903, PMID:20490924, international journal of molecular medicine 19: 81-87, 2007.'
FAOXC164C143x	'FAOXC164C143x'	'coa[x] + h2o[x] + nad[x] + 2hexdtetcoa[x] -> accoa[x] + h[x] + nadh[x] + 5tedtricoa[x] '	'FAO'	Peroxisomal bifunctional enzyme,Peroxisomal multifunctional enzyme type 2,3-ketoacyl-CoA thiolase, peroxisomal	'4.2.1.17,1.1.1.35,2.3.1.16'	4	'(1962.1 and 3295.1 and 30.1)'	'beta oxidation'	'PMID:7876265, PMID:20558530'
FAOXC164C163x	'FAOXC164C163x'	'h[x] + nadph[x] + hexdectecoa[x] -> nadp[x] + 3hexdtricoa[x] '	'FAO'	Peroxisomal 2,4-dienoyl-CoA reductase	'1.3.1.34'	4	'26063.1'	'2,4-dienoyl coA reductase'	'PMID: 11514237'
FAOXC164C165m	'FAOXC164C165m'	'fad[m] + 4hexdtetcoa[m] -> fadh2[m] + hedepecoa[m] '	'FAO'	Very long-chain specific acyl-CoA dehydrogenase, mitochondrial	'1.3.99.-'	4	'37.1'	'acyl coA dehydrogenase'	'PMCID: PMC2702680'
FAOXC164C165x	'FAOXC164C165x'	'o2[x] + 4hexdtetcoa[x] -> h2o2[x] + hexdpencoa[x] '	'FAO'	Peroxisomal acyl-coenzyme A oxidase 1	'1.3.3.6'	4	'51.1'	'peroxisomal acyl coA oxidase reaction.'	'PMID: 18536048, PMID: 17458872'
FAOXC164GC163m	'FAOXC164GC163m'	'h[m] + nadph[m] + hexdectecoa[m] -> nadp[m] + 3hexdtricoa[m] '	'FAO'	2,4-dienoyl-CoA reductase, mitochondrial	'1.3.1.34'	4	'1666.1'	''	'PMID: 7818482'
FAOXC164m	'FAOXC164m'	'3hexdtetcoa[m] -> 2hexdtetcoa[m] '	'FAO'	3,2-trans-enoyl-CoA isomerase, mitochondrial	'5.3.3.8'	4	'1632.1'	'cis-delta3->trans-delta2 isomerase'	'"Journal of Molecular Biology, Volume 342, Issue 4, 24 September 2004, Pages 1197-1208"'
FAOXC164x	'FAOXC164x'	'3hexdtetcoa[x] -> 2hexdtetcoa[x] '	'FAO'	Peroxisomal bifunctional enzyme,Peroxisomal 3,2-trans-enoyl-CoA isomerase	'5.3.3.8'	4	'(1962.1 or 10455.1)'	'delta3-cis- delta2-trans isomerase'	'PNAS August 1, 1992 vol. 89 no. 15 6673-6677,PMID: 2303409,PMID: 10419495, FEBS LETTERS vol.215 no.2 228-232'
FAOXC165C164m	'FAOXC165C164m'	'h[m] + nadph[m] + hedepecoa[m] -> nadp[m] + 3hexdtetcoa[m] '	'FAO'	2,4-dienoyl-CoA reductase, mitochondrial	'1.3.1.34'	4	'1666.1'	'2,4-dienoyl coA reductase'	'PMID: 7818482'
FAOXC165C164x	'FAOXC165C164x'	'h[x] + nadph[x] + hexdpencoa[x] -> nadp[x] + 3hexdtetcoa[x] '	'FAO'	Peroxisomal 2,4-dienoyl-CoA reductase	'1.3.1.34'	4	'26063.1'	'delta-2,4-dienoyl coA reductase reaction'	'PMID: 11514237'
FAOXC16BRx	'FAOXC16BRx'	'atp[x] + coa[x] + phyt[x] -> amp[x] + phytcoa[x] + ppi[x] '	'FAO'	Very long-chain acyl-CoA synthetase	'6.2.1.-'	4	'11001.1'	''	'PMID: 11591435'
FAOXC16C14m	'FAOXC16C14m'	'coa[m] + fad[m] + h2o[m] + nad[m] + pmtcoa[m] -> accoa[m] + fadh2[m] + h[m] + nadh[m] + tdcoa[m] '	'FAO'	Very long-chain specific acyl-CoA dehydrogenase, mitochondrial ,Trifunctional enzyme subunit alpha, mitochondrial, Trifunctional enzyme subunit beta, mitochondrial	'1.3.99.-,4.2.1.17,1.1.1.211,2.3.1.16'	4	'(37.1 and 3030.1 and 3032.1)'	'mitochondrial beta oxidation'	'PMID:20195903, PMID:20490924, international journal of molecular medicine 19: 81-87, 2007.'
FAOXC16C14x	'FAOXC16C14x'	'coa[x] + h2o[x] + nad[x] + o2[x] + pmtcoa[x] -> accoa[x] + h2o2[x] + h[x] + nadh[x] + tdcoa[x] '	'FAO'	Peroxisomal acyl-coenzyme A oxidase 1,Peroxisomal bifunctional enzyme,Peroxisomal multifunctional enzyme type 2,3-ketoacyl-CoA thiolase, peroxisomal	'1.3.3.6,4.2.1.17,1.1.1.35,2.3.1.16'	4	'(51.1 and 1962.1 and 3295.1 and 30.1)'	'sequential beta oxidation of palmitoyl coA upto the stage of either hexanoyl coA or butanoyl coA.'	'PMID: 11411544, PMID:7876265, HMDB01521'
FAOXC16C16OHm	'FAOXC16C16OHm'	'fad[m] + h2o[m] + pmtcoa[m] -> fadh2[m] + 3hexdcoa[m] '	'FAO'	Very long-chain specific acyl-CoA dehydrogenase, mitochondrial and Long-chain enoyl-CoA hydratase	'1.3.99.-,4.2.1.17'	4	'(37.1 and 3030.1)'	''	'PMID: 9510849, clinical chemistry 46:2, 149-155(2000)'
FAOXC16DCC14DCx	'FAOXC16DCC14DCx'	'coa[x] + h2o[x] + nad[x] + o2[x] + hexdicoa[x] -> accoa[x] + h2o2[x] + h[x] + nadh[x] + c14dccoa[x] '	'FAO'	Peroxisomal acyl-coenzyme A oxidase 1,Peroxisomal bifunctional enzyme,Peroxisomal multifunctional enzyme type 2,3-ketoacyl-CoA thiolase, peroxisomal	'1.3.3.6,4.2.1.17,1.1.1.35,2.3.1.16'	4	'(51.1 and 1962.1 and 3295.1 and 30.1)'	'to acetyl coA and accumulates and then combines with free carnitine and ultimately excreated in urine'	'PMID:15060085,PMID:9827430'
FAOXC16DCr	'FAOXC16DCr'	'atp[r] + coa[r] + hexdiac[r] -> amp[r] + ppi[r] + hexdicoa[r] '	'FAO'	Long-chain-fatty-acid--CoA ligase 5	'6.2.1.3'	2	'51703.1'	'the enzyme is not yet charecterized at the molecular level.this evidence taken from mouse experiment.'	'PMID:15060085,PMCID:PMC1152672'
FAOXC16OHC16r	'FAOXC16OHC16r'	'h[r] + hdca[r] + nadph[r] + o2[r] -> h2o[r] + nadp[r] + omhpal[r] '	'FAO'	Leukotriene-B(4) omega-hydroxylase 1, Leukotriene-B(4) omega-hydroxylase 2	'1.14.13.30'	4	'(8529.1 and 4051.1)'	'PMID: 9827430-this reaction is omega oxidation of palmitic acid occuring in the microsomes.the dicarboxylic acid in then transported to peroxisomes'	'PMID: 4703570,PMID: 9827430,PMID:15060085'
FAOXC17C15m	'FAOXC17C15m'	'coa[m] + fad[m] + h2o[m] + hpdcacoa[m] + nad[m] -> accoa[m] + fadh2[m] + h[m] + nadh[m] + ptdcacoa[m] '	'FAO'	Very long-chain specific acyl-CoA dehydrogenase, mitochondrial , Trifunctional enzyme subunit alpha, mitochondrial , Trifunctional enzyme subunit beta, mitochondrial	'1.3.99.-,4.2.1.17,1.1.1.211,2.3.1.16'	4	'(37.1 and 3030.1 and 3032.1)'	'mitochondrial beta oxidation of odd chain fatty acids.after this it follows reaction no.80 untill the production of propanoyl coA,which after conversion to succinyl coA,enters TCA.'	'J. Oleo Sci. 57, (5) 293-299 (2008)'
FAOXC181C161m	'FAOXC181C161m'	'coa[m] + fad[m] + h2o[m] + nad[m] + octd11ecoa[m] -> accoa[m] + fadh2[m] + h[m] + hdcoa[m] + nadh[m] '	'FAO'	Very long-chain specific acyl-CoA dehydrogenase, mitochondrial , Trifunctional enzyme subunit alpha, mitochondrial , Trifunctional enzyme subunit beta, mitochondrial	'1.3.99.- , 4.2.1.17 , 1.1.1.211 , 2.3.1.16'	4	'(37.1 and 3030.1 and 3032.1)'	'mitochondrial beta oxidation'	'PMID:20195903, PMID:20490924, international journal of molecular medicine 19: 81-87, 2007.'
FAOXC181C161x	'FAOXC181C161x'	'coa[x] + h2o[x] + nad[x] + o2[x] + ocde9ecoa[x] -> accoa[x] + h2o2[x] + h[x] + nadh[x] + hexde7coa[x] '	'FAO'	Peroxisomal acyl-coenzyme A oxidase 1,Peroxisomal bifunctional enzyme,Peroxisomal multifunctional enzyme type 2,3-ketoacyl-CoA thiolase, peroxisomal	'1.3.3.6,4.2.1.17,1.1.1.35,2.3.1.16'	4	'(51.1 and 1962.1 and 3295.1 and 30.1)'	''	'PMID: 10709653, PMID: 11296696, PMID: 11330072, PMID: 16766224, PMID: 3821403'
FAOXC181C181OHm	'FAOXC181C181OHm'	'fad[m] + h2o[m] + octdececoa[m] -> fadh2[m] + 3octdece1coa[m] '	'FAO'	Very long-chain specific acyl-CoA dehydrogenase, mitochondrial and Long-chain enoyl-CoA hydratase	'1.3.99.-,4.2.1.17'	4	'(37.1 and 3030.1)'	''	'PMID:9510849'
FAOXC182C162m	'FAOXC182C162m'	'coa[m] + fad[m] + h2o[m] + lnlccoa[m] + nad[m] -> accoa[m] + fadh2[m] + h[m] + nadh[m] + hexddcoa[m] '	'FAO'	Very long-chain specific acyl-CoA dehydrogenase, mitochondrial,Trifunctional enzyme subunit alpha, mitochondrial,Trifunctional enzyme subunit beta, mitochondrial	'1.3.99.-,4.2.1.17,1.1.1.211,2.3.1.16'	4	'(37.1 and 3030.1 and 3032.1)'	'"the dehydrogenase action can also be catalyzed by ACAD9 gene(Biochemical and Biophysical Research Communications,Volume 297, Issue 4, 4 October 2002, Pages 1033-1042)."'	'harper''s biochemistry-25th edition-page no.242.'
FAOXC182C182OHm	'FAOXC182C182OHm'	'fad[m] + h2o[m] + lnlccoa[m] -> fadh2[m] + 3ocddcoa[m] '	'FAO'	Very long-chain specific acyl-CoA dehydrogenase, mitochondrial and Long-chain enoyl-CoA hydratase	'1.3.99.-,4.2.1.17'	4	'(37.1 and 3030.1)'	''	'PMID:9510849'
FAOXC183C163Gm	'FAOXC183C163Gm'	'coa[m] + fad[m] + h2o[m] + lnlncgcoa[m] + nad[m] -> accoa[m] + fadh2[m] + h[m] + nadh[m] + 4hexdtricoa[m] '	'FAO'	Very long-chain specific acyl-CoA dehydrogenase, mitochondrial , Trifunctional enzyme subunit alpha, mitochondrial , Trifunctional enzyme subunit beta, mitochondrial	'1.3.99.-,4.2.1.17,1.1.1.211,2.3.1.16'	4	'(37.1 and 3030.1 and 3032.1)'	''	'PMID:20195903, PMID:20490924, international journal of molecular medicine 19: 81-87, 2007.'
FAOXC183C163m	'FAOXC183C163m'	'coa[m] + fad[m] + h2o[m] + lnlncacoa[m] + nad[m] -> accoa[m] + fadh2[m] + h[m] + nadh[m] + hexdtrcoa[m] '	'FAO'	Very long-chain specific acyl-CoA dehydrogenase, mitochondrial , Trifunctional enzyme subunit alpha, mitochondrial , Trifunctional enzyme subunit beta, mitochondrial	'1.3.99.- , 4.2.1.17 , 1.1.1.211 , 2.3.1.16'	4	'(37.1 and 3030.1 and 3032.1)'	'mitochondrial beta oxidation'	'PMID:20195903, PMID:20490924, international journal of molecular medicine 19: 81-87, 2007.'
FAOXC184C163m	'FAOXC184C163m'	'coa[m] + h2o[m] + nad[m] + 2octdectecoa[m] -> accoa[m] + h[m] + nadh[m] + 4hexdtricoa[m] '	'FAO'	0	'4.2.1.17,1.1.1.211,2.3.1.16'	4	'(3030.1 and 3032.1)'	'beta oxidation'	'PMID:20195903, PMID:20490924, international journal of molecular medicine 19: 81-87, 2007.'
FAOXC184C163x	'FAOXC184C163x'	'coa[x] + h2o[x] + nad[x] + 2octdectecoa[x] -> accoa[x] + h[x] + nadh[x] + 4hexdtricoa[x] '	'FAO'	Peroxisomal bifunctional enzyme,Peroxisomal multifunctional enzyme type 2,3-ketoacyl-CoA thiolase, peroxisomal	'4.2.1.17,1.1.1.35,2.3.1.16'	4	'(1962.1 and 3295.1 and 30.1)'	'peroxisomal beta oxidation reaction'	'PMID:20064629, journal of lipid research 1998 vol 39 pages 2161-2171'
FAOXC184C164m	'FAOXC184C164m'	'coa[m] + fad[m] + h2o[m] + nad[m] + strdnccoa[m] -> accoa[m] + fadh2[m] + h[m] + nadh[m] + 4hexdtetcoa[m] '	'FAO'	Very long-chain specific acyl-CoA dehydrogenase, mitochondrial , Trifunctional enzyme subunit alpha, mitochondrial , Trifunctional enzyme subunit beta, mitochondrial	'1.3.99.-,4.2.1.17,1.1.1.211,2.3.1.16'	4	'(37.1 and 3030.1 and 3032.1)'	''	'PMID:20195903, PMID:20490924, international journal of molecular medicine 19: 81-87, 2007.'
FAOXC184C164x	'FAOXC184C164x'	'coa[x] + h2o[x] + nad[x] + o2[x] + strdnccoa[x] -> accoa[x] + h2o2[x] + h[x] + nadh[x] + 4hexdtetcoa[x] '	'FAO'	Peroxisomal acyl-coenzyme A oxidase 1,Peroxisomal bifunctional enzyme,Peroxisomal multifunctional enzyme type 2,3-ketoacyl-CoA thiolase, peroxisomal	'1.3.3.6,4.2.1.17,1.1.1.35,2.3.1.16'	4	'(51.1 and 1962.1 and 3295.1 and 30.1)'	'peroxisoaml beta oxidation'	'PMID:20558530'
FAOXC184m	'FAOXC184m'	'3octdectecoa[m] -> 2octdectecoa[m] '	'FAO'	0	''	4	'1632.1'	'cis-delta3->trans-delta2 isomerase'	'"Journal of Molecular Biology, Volume 342, Issue 4, 24 September 2004, Pages 1197-1208 5.3.3.8'
FAOXC184x	'FAOXC184x'	'3octdectecoa[x] -> 2octdectecoa[x] '	'FAO'	Peroxisomal bifunctional enzyme,Peroxisomal 3,2-trans-enoyl-CoA isomerase	'5.3.3.8'	4	'(1962.1 or 10455.1)'	'delta3-cis->delta 2-trans isomerase'	'PNAS August 1, 1992 vol. 89 no. 15 6673-6677,PMID: 2303409,PMID: 10419495, FEBS LETTERS vol.215 no.2 228-232'
FAOXC185C164m	'FAOXC185C164m'	'coa[m] + h2o[m] + nad[m] + 2octpencoa[m] -> accoa[m] + h[m] + nadh[m] + 4hexdtetcoa[m] '	'FAO'	Very long-chain specific acyl-CoA dehydrogenase, mitochondrial , Trifunctional enzyme subunit alpha, mitochondrial , Trifunctional enzyme subunit beta, mitochondrial	'1.3.99.-,4.2.1.17,1.1.1.211,2.3.1.16'	4	'(37.1 and 3030.1 and 3032.1)'	''	'PMID:20195903, PMID:20490924, international journal of molecular medicine 19: 81-87, 2007.'
FAOXC185m	'FAOXC185m'	'3octpencoa[m] -> 2octpencoa[m] '	'FAO'	3,2-trans-enoyl-CoA isomerase, mitochondrial	'5.3.3.8'	4	'1632.1'	'cis-delta3->trans-delta2 isomerase'	'"Journal of Molecular Biology, Volume 342, Issue 4, 24 September 2004, Pages 1197-1208"'
FAOXC18C18OHm	'FAOXC18C18OHm'	'fad[m] + h2o[m] + stcoa[m] -> fadh2[m] + 3hodcoa[m] '	'FAO'	Very long-chain specific acyl-CoA dehydrogenase, mitochondrial and Long-chain enoyl-CoA hydratase	'1.3.99.-,4.2.1.17'	4	'(37.1 and 3030.1)'	'PMID: 11751554'	'PMID: 11751554'
FAOXC201C181x	'FAOXC201C181x'	'coa[x] + h2o[x] + nad[x] + o2[x] + ei11ecoa[x] -> accoa[x] + h2o2[x] + h[x] + nadh[x] + ocde9ecoa[x] '	'FAO'	Peroxisomal acyl-coenzyme A oxidase 1,Peroxisomal bifunctional enzyme,Peroxisomal multifunctional enzyme type 2,3-ketoacyl-CoA thiolase, peroxisomal	'1.3.3.6,4.2.1.17,1.1.1.35,2.3.1.16'	4	'(51.1 and 1962.1 and 3295.1 and 30.1)'	'one cycle of peroxisomal beta oxidation'	'PMID: 20626744, PMID: 3821403'
FAOXC204C184m	'FAOXC204C184m'	'coa[m] + fad[m] + h2o[m] + nad[m] + eitetcoa[m] -> accoa[m] + fadh2[m] + h[m] + nadh[m] + 3octdectecoa[m] '	'FAO'	Very long-chain specific acyl-CoA dehydrogenase, mitochondrial , Trifunctional enzyme subunit alpha, mitochondrial , Trifunctional enzyme subunit beta, mitochondrial	'1.3.99.-,4.2.1.17,1.1.1.211,2.3.1.16'	4	'(37.1 and 3030.1 and 3032.1)'	''	'PMID:20195903, PMID:20490924, international journal of molecular medicine 19: 81-87, 2007.'
FAOXC204C205x	'FAOXC204C205x'	'o2[x] + eitetcoa[x] -> h2o2[x] + eipencoa[x] '	'FAO'	Peroxisomal acyl-coenzyme A oxidase 1	'1.3.3.6'	4	'51.1'	'peroxisomal acyl coA oxidase reaction.'	'PMID: 18536048, PMID: 17458872'
FAOXC205C184x	'FAOXC205C184x'	'coa[x] + h2o[x] + nad[x] + eipencoa[x] -> accoa[x] + h[x] + nadh[x] + 3octdectecoa[x] '	'FAO'	Peroxisomal bifunctional enzyme,Peroxisomal multifunctional enzyme type 2,3-ketoacyl-CoA thiolase, peroxisomal	'4.2.1.17,1.1.1.35,2.3.1.16'	4	'(1962.1 and 3295.1 and 30.1)'	'peroxisomal beta oxidation reaction'	'PMID:20064629, journal of lipid research 1998 vol 39 pages 2161-2171'
FAOXC205C185m	'FAOXC205C185m'	'coa[m] + fad[m] + h2o[m] + nad[m] + 5eipencoa[m] -> accoa[m] + fadh2[m] + h[m] + nadh[m] + 3octpencoa[m] '	'FAO'	Very long-chain specific acyl-CoA dehydrogenase, mitochondrial , Trifunctional enzyme subunit alpha, mitochondrial , Trifunctional enzyme subunit beta, mitochondrial	'1.3.99.-,4.2.1.17,1.1.1.211,2.3.1.16'	4	'(37.1 and 3030.1 and 3032.1)'	'one cycle of beta oxidation'	'PMID:20195903, PMID:20490924, international journal of molecular medicine 19: 81-87, 2007.'
FAOXC221C201x	'FAOXC221C201x'	'coa[x] + h2o[x] + nad[x] + o2[x] + doco13ecoa[x] -> accoa[x] + h2o2[x] + h[x] + nadh[x] + ei11ecoa[x] '	'FAO'	Peroxisomal acyl-coenzyme A oxidase 1,Peroxisomal bifunctional enzyme,Peroxisomal multifunctional enzyme type 2,3-ketoacyl-CoA thiolase, peroxisomal	'1.3.3.6,4.2.1.17,1.1.1.35,2.3.1.16'	4	'(51.1 and 1962.1 and 3295.1 and 30.1)'	'one cycle of peroxisomal beta oxidation'	'PMID: 20626744 '
FAOXC225C204m	'FAOXC225C204m'	'coa[m] + h2o[m] + nad[m] + 2docopencoa[m] -> accoa[m] + h[m] + nadh[m] + eitetcoa[m] '	'FAO'	Trifunctional enzyme subunit alpha, mitochondrial , Trifunctional enzyme subunit beta, mitochondrial	'4.2.1.17,1.1.1.211,2.3.1.16'	4	'(3030.1 and 3032.1)'	''	'PMID:20195903, PMID:20490924, international journal of molecular medicine 19: 81-87, 2007.'
FAOXC225C204x	'FAOXC225C204x'	'coa[x] + h2o[x] + nad[x] + 2docopencoa[x] -> accoa[x] + h[x] + nadh[x] + eitetcoa[x] '	'FAO'	Peroxisomal bifunctional enzyme,Peroxisomal multifunctional enzyme type 2,3-ketoacyl-CoA thiolase, peroxisomal	'4.2.1.17,1.1.1.35,2.3.1.16'	4	'(1962.1 and 3295.1 and 30.1)'	'peroxisomal beta oxidation'	'PMID:20064629, journal of lipid research 1998 vol 39 pages 2161-2171'
FAOXC225C226m	'FAOXC225C226m'	'dcsptn1coa[m] + fad[m] -> fadh2[m] + docohexcoa[m] '	'FAO'	Very long-chain specific acyl-CoA dehydrogenase, mitochondrial	'1.3.99.-'	4	'37.1'	'acyl coA dehydrogenase'	'PMCID: PMC2702680'
FAOXC225C226x	'FAOXC225C226x'	'dcsptn1coa[x] + o2[x] -> h2o2[x] + docohexcoa[x] '	'FAO'	Peroxisomal acyl-coenzyme A oxidase 1	'1.3.3.6'	4	'51.1'	'peroxisomal acyl coA oxidase reaction.'	'PMID: 18536048, PMID: 17458872'
FAOXC225m	'FAOXC225m'	'3docopencoa[m] -> 2docopencoa[m] '	'FAO'	3,2-trans-enoyl-CoA isomerase, mitochondrial	'5.3.3.8'	4	'1632.1'	'cis-delta3->trans-delta2 isomerase'	'"Journal of Molecular Biology, Volume 342, Issue 4, 24 September 2004, Pages 1197-1208"'
FAOXC225x	'FAOXC225x'	'3docopencoa[x] -> 2docopencoa[x] '	'FAO'	Peroxisomal bifunctional enzyme,Peroxisomal 3,2-trans-enoyl-CoA isomerase	'5.3.3.8'	4	'(1962.1 or 10455.1)'	'delta3-cis->delta 2-trans isomerase'	'PNAS August 1, 1992 vol. 89 no. 15 6673-6677,PMID: 2303409,PMID: 10419495, FEBS LETTERS vol.215 no.2 228-232'
FAOXC226C205m	'FAOXC226C205m'	'coa[m] + h2o[m] + nad[m] + 2docohexecoa[m] -> accoa[m] + h[m] + nadh[m] + 5eipencoa[m] '	'FAO'	Very long-chain specific acyl-CoA dehydrogenase, mitochondrial ,Trifunctional enzyme subunit alpha, mitochondrial , Trifunctional enzyme subunit beta, mitochondrial	'1.3.99.-,4.2.1.17,1.1.1.211,2.3.1.16'	4	'(37.1 and 3030.1 and 3032.1)'	'one cycle of beta oxidation'	'PMID:20195903, PMID:20490924, international journal of molecular medicine 19: 81-87, 2007.'
FAOXC226C225m	'FAOXC226C225m'	'h[m] + nadph[m] + docohexcoa[m] -> nadp[m] + 3docopencoa[m] '	'FAO'	2,4-dienoyl-CoA reductase, mitochondrial	'1.3.1.34'	4	'1666.1'	'2,4-dienoyl coA reductase'	'PMID: 7818482'
FAOXC226C225x	'FAOXC226C225x'	'h[x] + nadph[x] + docohexcoa[x] -> nadp[x] + 3docopencoa[x] '	'FAO'	Peroxisomal 2,4-dienoyl-CoA reductase	'1.3.1.34'	4	'26063.1'	'2,4-dienoyl coA reductase'	'PMID: 11514237'
FAOXC226C227m	'FAOXC226C227m'	'c226coa[m] + fad[m] -> fadh2[m] + docohepcoa[m] '	'FAO'	Very long-chain specific acyl-CoA dehydrogenase, mitochondrial	'1.3.99.-'	4	'37.1'	'acyl coA dehydrogenase'	'PMCID: PMC2702680'
FAOXC226m	'FAOXC226m'	'docosahexcoa[m] -> 2docohexecoa[m] '	'FAO'	3,2-trans-enoyl-CoA isomerase, mitochondrial	'5.3.3.8'	4	'1632.1'	'cis-delta3->trans-delta2 isomerase'	'"Journal of Molecular Biology, Volume 342, Issue 4, 24 September 2004, Pages 1197-1208"'
FAOXC227C226m	'FAOXC227C226m'	'h[m] + nadph[m] + docohepcoa[m] -> nadp[m] + docosahexcoa[m] '	'FAO'	2,4-dienoyl-CoA reductase, mitochondrial	'1.3.1.34'	4	'1666.1'	'2,4-dienoyl coA reductase'	'PMID: 7818482'
FAOXC22C20x	'FAOXC22C20x'	'coa[x] + h2o[x] + nad[x] + o2[x] + docoscoa[x] -> accoa[x] + arachcoa[x] + h2o2[x] + h[x] + nadh[x] '	'FAO'	Peroxisomal acyl-coenzyme A oxidase 1,Peroxisomal bifunctional enzyme,Peroxisomal multifunctional enzyme type 2,3-ketoacyl-CoA thiolase, peroxisomal	'1.3.3.6,4.2.1.17,1.1.1.35,2.3.1.16'	4	'(51.1 and 1962.1 and 3295.1 and 30.1)'	'one cycle of peroxisomal beta oxidation'	'PMID: 11124748 '
FAOXC22C22DCHYr	'FAOXC22C22DCHYr'	3 nadph[r] + 3 o2[r] + docosac[r] + 3 h[r] -> 4 h2o[r] + h[r] + 3 nadp[r] + docosdiac[r] '	'FAO'	Leukotriene-B(4) omega-hydroxylase 1, Leukotriene-B(4) omega-hydroxylase 2	'1.14.13.30, 1.14.13.30'	4	'(8529.1 and 4051.1)'	'for the production of dicarboxylic acids.PMID: 15716582,PMID: 19783438. one proton was added to the product for elemental and charge balancing.'	'PMID: 15716582,PMID: 19783438'
FAOXC22OHC22r	'FAOXC22OHC22r'	'h[r] + nadph[r] + o2[r] + docosac[r] -> h2o[r] + nadp[r] + omhdocosac[r] '	'FAO'	Leukotriene-B(4) omega-hydroxylase 1, Leukotriene-B(4) omega-hydroxylase 2	'1.14.13.30'	4	'(8529.1 and 4051.1)'	'omega oxidation of docosanoic acid in rat liver microsomes,showing two possible pathways '	'PMID: 15716582,PMID: 19783438'
FAOXC241C221x	'FAOXC241C221x'	'coa[x] + h2o[x] + nad[x] + nrvnccoa[x] + o2[x] -> accoa[x] + h2o2[x] + h[x] + nadh[x] + doco13ecoa[x] '	'FAO'	Peroxisomal acyl-coenzyme A oxidase 1,Peroxisomal bifunctional enzyme,Peroxisomal multifunctional enzyme type 2,3-ketoacyl-CoA thiolase, peroxisomal	'1.3.3.6,4.2.1.17,1.1.1.35,2.3.1.16'	4	'(51.1 and 1962.1 and 3295.1 and 30.1)'	'one cycle of peroxisomal beta oxidation'	'PMID: 20626744 '
FAOXC24C22x	'FAOXC24C22x'	'coa[x] + h2o[x] + lgnccoa[x] + nad[x] + o2[x] -> accoa[x] + h2o2[x] + h[x] + nadh[x] + docoscoa[x] '	'FAO'	Peroxisomal acyl-coenzyme A oxidase 1,Peroxisomal bifunctional enzyme,Peroxisomal multifunctional enzyme type 2,3-ketoacyl-CoA thiolase, peroxisomal	'1.3.3.6,4.2.1.17,1.1.1.35,2.3.1.16'	4	'(51.1 and 1962.1 and 3295.1 and 30.1)'	'one cycle of beta oxidation.this occurs in peroxisomes.the peroxisomal multifunctional enzyme acts as a catalyst for the formation of ketoacyl intermediates.'	'PMCID:PMC1131640'
FAOXC3DC	'FAOXC3DC'	'crn[c] + malcoa[c] <=> coa[c] + c3dc[c] '	'FAO'	Carnitine O-palmitoyltransferase 1, liver isoform,Carnitine O-palmitoyltransferase 1, muscle isoform,Carnitine O-palmitoyltransferase 1, brain isoform	'2.3.1.21'	4	'(1374.1 or 1375.1 or 126129.1)'	'due to deficiency of malonyl coA decarboxylase enzyme,malonyl coA cannot be converted back '	'PMID: 12651823,PMID: 18192268'
FAOXC4C2m	'FAOXC4C2m'	'btcoa[m] + coa[m] + fad[m] + h2o[m] + nad[m] -> 2 accoa[m] + fadh2[m] + h[m] + nadh[m] '	'FAO'	Short-chain specific acyl-CoA dehydrogenase, mitochondrial,Enoyl-CoA hydratase, mitochondrial,Hydroxyacyl-coenzyme A dehydrogenase, mitochondrial,3-ketoacyl-CoA thiolase, mitochondrial	'1.3.99.2,4.2.1.17,1.1.1.35,2.3.1.16'	4	'(35.1 and 1892.1 and 3033.1 and 10449.1)'	''	'PMID:20195903, PMID:20490924, international journal of molecular medicine 19: 81-87, 2007.'
FAOXC4C4DCc	'FAOXC4C4DCc'	'crn[c] + succoa[c] <=> coa[c] + c4dc[c] '	'FAO'	Carnitine O-palmitoyltransferase 1, liver isoform,Carnitine O-palmitoyltransferase 1, muscle isoform,Carnitine O-palmitoyltransferase 1, brain isoform	'2.3.1.21'	4	'(1374.1 or 1375.1 or 126129.1)'	''	'PMID:15060085'
FAOXC5C3x	'FAOXC5C3x'	'coa[m] + fad[m] + h2o[m] + nad[m] + pentcoa[m] -> accoa[m] + fadh2[m] + h[m] + nadh[m] + ppcoa[m] '	'FAO'	Short-chain specific acyl-CoA dehydrogenase, mitochondrial , Enoyl-CoA hydratase, mitochondrial ,Hydroxyacyl-coenzyme A dehydrogenase, mitochondrial, 3-ketoacyl-CoA thiolase, mitochondrial	'1.3.99.2,4.2.1.17,1.1.1.35,2.3.1.16'	4	'(35.1 and 1892.1 and 3033.1 and 10449.1)'	'mitochondrial beta oxidation of odd chain fatty acids.'	'PEDIATRICS INTERNATIONAL ,FEB 1999 ,Volume: 41 Issue: 1 Pages: 52-60 '
FAOXC5C5DCc	'FAOXC5C5DCc'	'crn[c] + glutcoa[c] <=> coa[c] + c5dc[c] '	'FAO'	Carnitine O-palmitoyltransferase 1, liver isoform,Carnitine O-palmitoyltransferase 1, muscle isoform,Carnitine O-palmitoyltransferase 1, brain isoform	'2.3.1.21'	4	'(1374.1 or 1375.1 or 126129.1)'	'1.2.4.2 is the E.C no.due to the absence of glutaryl coA dehydrogenase, glutaryl coA accumulates and combines with free carnitine forming glutaryl carnitine.C5DC then excreated in urine.'	'http://www.perkinelmergenetics.com/GlutaricAcidemiaTypeI.html , PMID: 16602100'
FAOXC5C5OHm	'FAOXC5C5OHm'	'3mb2coa[m] + h2o[m] -> 3ivcoa[m] '	'FAO'	0	''	4	''	'alpha keto acid decarboxylase catalyzes leucine degradation, due to the absence of the next enzyme i.e acyl coA dehydrogenase isovaleryl coA accumulates and combines with free carnitine forming C5OH fattyl acyl carnitine.HMDB00754'	'clinica chimica acta 240 (1995) 35-51'
FAOXC5OHc	'FAOXC5OHc'	'crn[c] + 3ivcoa[c] <=> coa[c] + 3ivcrn[c] '	'FAO'	Carnitine O-palmitoyltransferase 1, liver isoform,Carnitine O-palmitoyltransferase 1, muscle isoform,Carnitine O-palmitoyltransferase 1, brain isoform	'2.3.1.21'	4	'(1374.1 or 1375.1 or 126129.1)'	'deficiency of 3-methylcrotonylcoa carboxylase.clinica chimica acta 240 (1995) 35-51'	'clinica chimica acta 240 (1995) 35-51, http://www.perkinelmergenetics.com/3Hydroxy3MethylglutarylCoALyaseDeficiency.html'
FAOXC61C4m	'FAOXC61C4m'	'coa[m] + h2o[m] + nad[m] + hx2coa[m] -> accoa[m] + btcoa[m] + h[m] + nadh[m] '	'FAO'	Enoyl-CoA hydratase, mitochondrial ,Hydroxyacyl-coenzyme A dehydrogenase, mitochondrial , 3-ketoacyl-CoA thiolase, mitochondrial	'4.2.1.17,1.1.1.35,2.3.1.16'	4	'(1892.1 and 3033.1 and 10449.1)'	''	'PMID:20195903, PMID:20490924, international journal of molecular medicine 19: 81-87, 2007.'
FAOXC61C4x	'FAOXC61C4x'	'coa[x] + h2o[x] + nad[x] + hx2coa[x] -> accoa[x] + h[x] + nadh[x] + btcoa[x] '	'FAO'	Peroxisomal bifunctional enzyme,Peroxisomal multifunctional enzyme type 2,3-ketoacyl-CoA thiolase, peroxisomal	'4.2.1.17,1.1.1.35,2.3.1.16'	4	'(1962.1 and 3295.1 and 30.1)'	'peroxisomal beta oxidation reaction.the butyryl coA is then transported to mitochondria, where it is further oxidized.'	'PMID:20064629'
FAOXC61m	'FAOXC61m'	'hexe3coa[m] -> hx2coa[m] '	'FAO'	3,2-trans-enoyl-CoA isomerase, mitochondrial	'5.3.3.8'	4	'1632.1'	'cis-delta3->trans-delta2 isomerase'	'"Journal of Molecular Biology, Volume 342, Issue 4, 24 September 2004, Pages 1197-1208"'
FAOXC61x	'FAOXC61x'	'hexe3coa[x] -> hx2coa[x] '	'FAO'	Peroxisomal bifunctional enzyme,Peroxisomal 3,2-trans-enoyl-CoA isomerase	'5.3.3.8'	4	'(1962.1 or 10455.1)'	'delta3-cis->delta 2-trans isomerase'	'PNAS August 1, 1992 vol. 89 no. 15 6673-6677,PMID: 2303409,PMID: 10419495, FEBS LETTERS vol.215 no.2 228-232'
FAOXC6C4m	'FAOXC6C4m'	'coa[m] + fad[m] + h2o[m] + nad[m] + hxcoa[m] -> accoa[m] + btcoa[m] + fadh2[m] + h[m] + nadh[m] '	'FAO'	Medium-chain specific acyl-CoA dehydrogenase, mitochondrial , Enoyl-CoA hydratase, mitochondrial ,Hydroxyacyl-coenzyme A dehydrogenase, mitochondrial ,3-ketoacyl-CoA thiolase, mitochondrial	'1.3.99.3,4.2.1.17,1.1.1.35,2.3.1.16'	4	'(34.1 and 1892.1 and 3033.1 and 10449.1)'	''	'PMID:20195903, PMID:20490924, international journal of molecular medicine 19: 81-87, 2007.'
FAOXC6C4x	'FAOXC6C4x'	'coa[x] + h2o[x] + nad[x] + o2[x] + hxcoa[x] -> accoa[x] + h2o2[x] + h[x] + nadh[x] + btcoa[x] '	'FAO'	Peroxisomal acyl-coenzyme A oxidase 1,Peroxisomal bifunctional enzyme,Peroxisomal multifunctional enzyme type 2,3-ketoacyl-CoA thiolase, peroxisomal	'1.3.3.6,4.2.1.17,1.1.1.35,2.3.1.16'	4	'(51.1 and 1962.1 and 3295.1 and 30.1)'	''	'PMID: 11356164, HMDB01088'
FAOXC6DCC4DCx	'FAOXC6DCC4DCx'	'coa[x] + h2o[x] + nad[x] + o2[x] + adpcoa[x] -> accoa[x] + h2o2[x] + h[x] + nadh[x] + succoa[x] '	'FAO'	Peroxisomal acyl-coenzyme A oxidase 1,Peroxisomal bifunctional enzyme,Peroxisomal multifunctional enzyme type 2,3-ketoacyl-CoA thiolase, peroxisomal	'1.3.3.6,4.2.1.17,1.1.1.35,2.3.1.16'	4	'(51.1 and 1962.1 and 3295.1 and 30.1)'	''	'PMID:15060085,PMID:9827430'
FAOXC7C5m	'FAOXC7C5m'	'coa[m] + fad[m] + h2o[m] + nad[m] + hepcoa[m] -> accoa[m] + fadh2[m] + h[m] + nadh[m] + pentcoa[m] '	'FAO'	Medium-chain specific acyl-CoA dehydrogenase, mitochondrial , Enoyl-CoA hydratase, mitochondrial ,Hydroxyacyl-coenzyme A dehydrogenase, mitochondrial, 3-ketoacyl-CoA thiolase, mitochondrial	'1.3.99.3,4.2.1.17,1.1.1.35,2.3.1.16'	4	'(34.1 and 1892.1 and 3033.1 and 10449.1)'	'mitochondrial beta oxidation of odd chain fatty acids.'	'J. Oleo Sci. 57, (5) 293-299 (2008)'
FAOXC81C61m	'FAOXC81C61m'	'coa[m] + fad[m] + h2o[m] + nad[m] + octe5coa[m] -> accoa[m] + fadh2[m] + h[m] + nadh[m] + hexe3coa[m] '	'FAO'	Medium-chain specific acyl-CoA dehydrogenase, mitochondrial , Enoyl-CoA hydratase, mitochondrial ,Hydroxyacyl-coenzyme A dehydrogenase, mitochondrial , 3-ketoacyl-CoA thiolase, mitochondrial	'1.3.99.3,4.2.1.17,1.1.1.35,2.3.1.16'	4	'(34.1 and 1892.1 and 3033.1 and 10449.1)'	''	'PMID:20195903, PMID:20490924, international journal of molecular medicine 19: 81-87, 2007.'
FAOXC81C61x	'FAOXC81C61x'	'coa[x] + h2o[x] + nad[x] + o2[x] + octe5coa[x] -> accoa[x] + h2o2[x] + h[x] + nadh[x] + hexe3coa[x] '	'FAO'	Peroxisomal acyl-coenzyme A oxidase 1,Peroxisomal bifunctional enzyme,Peroxisomal multifunctional enzyme type 2,3-ketoacyl-CoA thiolase, peroxisomal	'1.3.3.6,4.2.1.17,1.1.1.35,2.3.1.16'	4	'(51.1 and 1962.1 and 3295.1 and 30.1)'	'peroxisomal beta oxidation reaction.'	'PMID:20558530'
FAOXC8C6m	'FAOXC8C6m'	'coa[m] + fad[m] + h2o[m] + nad[m] + occoa[m] -> accoa[m] + fadh2[m] + h[m] + nadh[m] + hxcoa[m] '	'FAO'	Medium-chain specific acyl-CoA dehydrogenase, mitochondrial , Enoyl-CoA hydratase, mitochondrial ,Hydroxyacyl-coenzyme A dehydrogenase, mitochondrial ,3-ketoacyl-CoA thiolase, mitochondrial	'1.3.99.3,4.2.1.17,1.1.1.35,2.3.1.16'	4	'(34.1 and 1892.1 and 3033.1 and 10449.1)'	''	'PMID:20195903, PMID:20490924, international journal of molecular medicine 19: 81-87, 2007.'
FAOXC8C6x	'FAOXC8C6x'	'coa[x] + h2o[x] + nad[x] + o2[x] + occoa[x] -> accoa[x] + h2o2[x] + h[x] + nadh[x] + hxcoa[x] '	'FAO'	Peroxisomal acyl-coenzyme A oxidase 1,Peroxisomal bifunctional enzyme,Peroxisomal multifunctional enzyme type 2,3-ketoacyl-CoA thiolase, peroxisomal	'1.3.3.6,4.2.1.17,1.1.1.35,2.3.1.16'	4	'(51.1 and 1962.1 and 3295.1 and 30.1)'	''	'PMID: 11411544, HMDB02845'
FAOXC8DCC6DCx	'FAOXC8DCC6DCx'	'coa[x] + h2o[x] + nad[x] + o2[x] + sbcoa[x] -> accoa[x] + h2o2[x] + h[x] + nadh[x] + adpcoa[x] '	'FAO'	Peroxisomal acyl-coenzyme A oxidase 1,Peroxisomal bifunctional enzyme,Peroxisomal multifunctional enzyme type 2,3-ketoacyl-CoA thiolase, peroxisomal	'1.3.3.6,4.2.1.17,1.1.1.35,2.3.1.16'	4	'(51.1 and 1962.1 and 3295.1 and 30.1)'	''	'PMID:15060085,PMID:9827430'
FAOXC9BRC7BRm	'FAOXC9BRC7BRm'	'coa[m] + dmnoncoa[m] + fad[m] + h2o[m] + nad[m] -> accoa[m] + fadh2[m] + h[m] + nadh[m] + dmhepcoa[m] '	'FAO'	0	''	4	''	'First cycle of mitochondrial beta oxidation. The mitochondrial acylcoA dehydrogenases cannot act on branched chain fatty acids so no GPR association could be found for this reaction. Recon 1 mentions ACADM gene with this reaction. In Recon 1, the neutral formula for dmnoncoa should be corrected to C32H56N7O17P3S (HMDB11604) and charged formula to C32H52N7O17P3S with -4 as the charge. Therefore t…	'PMID: 9469587,HMDB06258,PMID:9714723,PMID:11591435'
FAOXC9C7m	'FAOXC9C7m'	'coa[m] + fad[m] + h2o[m] + nad[m] + noncoa[m] -> accoa[m] + fadh2[m] + h[m] + nadh[m] + hepcoa[m] '	'FAO'	Medium-chain specific acyl-CoA dehydrogenase, mitochondrial , Enoyl-CoA hydratase, mitochondrial ,Hydroxyacyl-coenzyme A dehydrogenase, mitochondrial, 3-ketoacyl-CoA thiolase, mitochondrial	'1.3.99.3,4.2.1.17,1.1.1.35,2.3.1.16'	4	'(34.1 and 1892.1 and 3033.1 and 10449.1)'	'mitochondrial beta oxidation of odd chain fatty acids.'	'J. Oleo Sci. 57, (5) 293-299 (2008), HMDB00666'
FAOXMC10OHMC10r	'FAOXMC10OHMC10r'	'h[r] + nadph[r] + o2[r] + dca[r] -> h2o[r] + nadp[r] + omhdecacid[r] '	'FAO'	Leukotriene-B(4) omega-hydroxylase 1, Leukotriene-B(4) omega-hydroxylase 2	'1.14.13.30'	4	'(8529.1 and 4051.1)'	''	'metabolism,vol45,1996-kou-yi tserng'
FAOXOHC16C16DCc	'FAOXOHC16C16DCc'	'h2o[c] + 2 nad[c] + omhpal[c] -> 3 h[c] + 2 nadh[c] + hexdiac[c] '	'FAO'	Alcohol dehydrogenase class-3,Fatty aldehyde dehydrogenase	'1.1.1.1,1.2.1.3'	3	'(128.1 and 224.1)'	'undergoes series of beta oxidation cycles to generate C8DC,C6DC,C4DC and acetate. The extra one proton was obtained in the product, from the aldehyde form of the omega-hydroxy palmitic acid (i.e. An intermediate not shown in this reaction). This was done in-order to balance the reaction and also to obtain the dicarboxylic form of the palmitic acid.'	'PMID:15060085,PMCID:PMC1152672'
FAOXOHC22C22DCc	'FAOXOHC22C22DCc'	'h2o[c] + 2 nad[c] + omhdocosac[c] -> 3 h[c] + 2 nadh[c] + docosdiac[c] '	'FAO'	Alcohol dehydrogenase class-3,Fatty aldehyde dehydrogenase	'1.1.1.1,1.2.1.3'	4	'(128.1 and 224.1)'	'one proton was added to the product for elemental and charge balancing.'	'PMID:15716582'
FAOXOHMC10DC10c	'FAOXOHMC10DC10c'	'h2o[c] + 2 nad[c] + omhdecacid[c] -> 3 h[c] + 2 nadh[c] + sebacid[c] '	'FAO'	Alcohol dehydrogenase class-3,Fatty aldehyde dehydrogenase	'1.1.1.1,1.2.1.3'	4	'(128.1 and 224.1)'	'The extra one proton was obtained in the product, from the aldehyde form of the omega-hydroxy decanoic acid (i.e. An intermediate not shown in this reaction). This was done in-order to balance the reaction and also to obtain the dicarboxylic form of the decanoic acid.'	'doi:10.1016/j.physletb.2003.10.071'
FAOXTC101TC102m	'FAOXTC101TC102m'	'fad[m] + tdec4ecoa[m] -> fadh2[m] + ctdecdcoa[m] '	'FAO'	Medium-chain specific acyl-CoA dehydrogenase, mitochondrial	'1.3.99.3'	4	'34.1'	'first cycle of mitochondrial beta oxidation.'	'PMID: 15337167'
FAOXTC102C101m	'FAOXTC102C101m'	'h[m] + nadph[m] + ctdecdcoa[m] -> nadp[m] + dece3coa[m] '	'FAO'	2,4-dienoyl-CoA reductase, mitochondrial	'1.3.1.34'	4	'1666.1'	'2,4-dienoyl coA reductase'	'PMID: 7818482'
FAOXTC122TC101m	'FAOXTC122TC101m'	'coa[m] + h2o[m] + nad[m] + tddedi2coa[m] -> accoa[m] + h[m] + nadh[m] + tdec4ecoa[m] '	'FAO'	Enoyl-CoA hydratase, mitochondrial ,Hydroxyacyl-coenzyme A dehydrogenase, mitochondrial , 3-ketoacyl-CoA thiolase, mitochondrial	'4.2.1.17,1.1.1.35,2.3.1.16'	4	'(1892.1 and 3033.1 and 10449.1)'	'mitochondrial beta oxidation'	'PMID:20195903, PMID:20490924, international journal of molecular medicine 19: 81-87, 2007.'
FAOXTC122m	'FAOXTC122m'	'tddedicoa[m] -> tddedi2coa[m] '	'FAO'	3,2-trans-enoyl-CoA isomerase, mitochondrial	'5.3.3.8'	4	'1632.1'	'cis-delta3->trans-delta2 isomerase'	'"Journal of Molecular Biology, Volume 342, Issue 4, 24 September 2004, Pages 1197-1208"'
FAOXTC142TC122m	'FAOXTC142TC122m'	'coa[m] + fad[m] + h2o[m] + nad[m] + ttetddcoa[m] -> accoa[m] + fadh2[m] + h[m] + nadh[m] + tddedicoa[m] '	'FAO'	Very long-chain specific acyl-CoA dehydrogenase, mitochondrial , Trifunctional enzyme subunit alpha, mitochondrial , Trifunctional enzyme subunit beta, mitochondrial	'1.3.99.3,4.2.1.17,1.1.1.211,2.3.1.16'	4	'(37.1 and 3030.1 and 3032.1)'	'mitochondrial beta oxidation'	'PMID:20195903, PMID:20490924, international journal of molecular medicine 19: 81-87, 2007.'
FAOXTC162TC142m	'FAOXTC162TC142m'	'coa[m] + fad[m] + h2o[m] + nad[m] + thexddcoa[m] -> accoa[m] + fadh2[m] + h[m] + nadh[m] + ttetddcoa[m] '	'FAO'	Very long-chain specific acyl-CoA dehydrogenase, mitochondrial ,Trifunctional enzyme subunit alpha, mitochondrial,Trifunctional enzyme subunit beta, mitochondrial	'1.3.99.-,4.2.1.17,1.1.1.211,2.3.1.16'	4	'(37.1 and 3030.1 and 3032.1)'	'mitochondrial beta oxidation'	'PMID:20195903, PMID:20490924, international journal of molecular medicine 19: 81-87, 2007.'
FAOXTC182TC162m	'FAOXTC182TC162m'	'coa[m] + fad[m] + h2o[m] + lneldccoa[m] + nad[m] -> accoa[m] + fadh2[m] + h[m] + nadh[m] + thexddcoa[m] '	'FAO'	Very long-chain specific acyl-CoA dehydrogenase, mitochondrial, Trifunctional enzyme subunit alpha, mitochondrial , Trifunctional enzyme subunit beta, mitochondrial	'1.3.99.- , 4.2.1.17 , 1.1.1.211 , 2.3.1.16'	4	'(37.1 and 3030.1 and 3032.1)'	'mitochondrial beta oxidation'	'PMID:20195903, PMID:20490924, international journal of molecular medicine 19: 81-87, 2007.'
FOAXC122C101x	'FOAXC122C101x'	'coa[x] + h2o[x] + nad[x] + 2ddecdicoa[x] -> accoa[x] + h[x] + nadh[x] + dece4coa[x] '	'FAO'	Peroxisomal bifunctional enzyme,Peroxisomal multifunctional enzyme type 2,3-ketoacyl-CoA thiolase, peroxisomal	'4.2.1.17,1.1.1.35,2.3.1.16'	4	'(1962.1 and 3295.1 and 30.1)'	'peroxisomal beta oxidation'	'PMID:20558530'
GLUTCOAACBP	'GLUTCOAACBP'	'glutcoa[m] <=> glutcoa[c] '	'FAO'	Acyl-CoA-binding protein	''	3	'1622.1'	'acyl coA binding protein is localized in cytosol, nucelus, golgi, E.R., mitochondrial inter memebrane space. In mitochondria its released when the integrity of the organelle is compromised. It has wide role in lipid metabolism, also acts as a coA transporter between different cellular compartments. can transport accumulated acyl coAs from cutosol into mitochondria for beta oxidation or into cyto…	'PMID: 20511713, PMID: 11859412, PMID: 16908521, PMID: 8001684'
HDCACBP	'HDCACBP'	'3hdcoa[m] <=> 3hdcoa[c] '	'FAO'	Acyl-CoA-binding protein	''	3	'1622.1'	'acyl coA binding protein is localized in cytosol, nucelus, golgi, E.R., mitochondrial inter memebrane space. In mitochondria its released when the integrity of the organelle is compromised. It has wide role in lipid metabolism, also acts as a coA transporter between different cellular compartments. can transport accumulated acyl coAs from cutosol into mitochondria for beta oxidation or into cyto…	'PMID: 20511713, PMID: 11859412, PMID: 16908521, PMID: 8001684'
HDDACBP	'HDDACBP'	'3hddcoa[m] <=> 3hddcoa[c] '	'FAO'	Acyl-CoA-binding protein	''	3	'1622.1'	'acyl coA binding protein is localized in cytosol, nucelus, golgi, E.R., mitochondrial inter memebrane space. In mitochondria its released when the integrity of the organelle is compromised. It has wide role in lipid metabolism, also acts as a coA transporter between different cellular compartments. can transport accumulated acyl coAs from cutosol into mitochondria for beta oxidation or into cyto…	'PMID: 20511713, PMID: 11859412, PMID: 16908521, PMID: 8001684'
HDECAACBP	'HDECAACBP'	'3hexdcoa[m] <=> 3hexdcoa[c] '	'FAO'	Acyl-CoA-binding protein	''	3	'1622.1'	'acyl coA binding protein is localized in cytosol, nucelus, golgi, E.R., mitochondrial inter memebrane space. In mitochondria its released when the integrity of the organelle is compromised. It has wide role in lipid metabolism, also acts as a coA transporter between different cellular compartments. can transport accumulated acyl coAs from cutosol into mitochondria for beta oxidation or into cyto…	'PMID: 20511713, PMID: 11859412, PMID: 16908521, PMID: 8001684'
HDECEACBP	'HDECEACBP'	'3hdeccoa[m] <=> 3hdeccoa[c] '	'FAO'	Acyl-CoA-binding protein	''	3	'1622.1'	'acyl coA binding protein is localized in cytosol, nucelus, golgi, E.R., mitochondrial inter memebrane space. In mitochondria its released when the integrity of the organelle is compromised. It has wide role in lipid metabolism, also acts as a coA transporter between different cellular compartments. can transport accumulated acyl coAs from cutosol into mitochondria for beta oxidation or into cyto…	'PMID: 20511713, PMID: 11859412, PMID: 16908521, PMID: 8001684'
HEDCECRNe	'HEDCECRNe'	'3hdececrn[c] -> 3hdececrn[e] '	'FAO'	0	''	2	''	'elevated C16:1OH in LCHAD and TFP deficiency'	'Jones LL, McDonald DA, Borum PR. (2010). Progress in Lipid Research 49: 61-75'
HEXCOAACBP	'HEXCOAACBP'	'hxcoa[m] -> hxcoa[c] '	'FAO'	Acyl-CoA-binding protein	''	3	'1622.1'	'acyl coA binding protein is localized in cytosol, nucelus, golgi, E.R., mitochondrial inter memebrane space. In mitochondria its released when the integrity of the organelle is compromised. It has wide role in lipid metabolism, also acts as a coA transporter between different cellular compartments. can transport accumulated acyl coAs from cutosol into mitochondria for beta oxidation or into cyto…	'PMID: 20511713, PMID: 11859412, PMID: 16908521, PMID: 8001684'
HEXDCRNe	'HEXDCRNe'	'3hexdcrn[c] -> 3hexdcrn[e] '	'FAO'	0	''	2	''	'elevated C16OH in LCHAD and TFP deficiency'	'Jones LL, McDonald DA, Borum PR. (2010). Progress in Lipid Research 49: 61-75'
HEXDIACTD	'HEXDIACTD'	'hexdiac[c] <=> hexdiac[r] '	'FAO'	0	''	2	''	'free fatty acids transported by simple diffusion, fatty acid transport proteins may be involved. Depends on the physiological concentration of these fatty acids.'	'PMID: 10331655, PMID: 11478366'
HEXDICOAACBP	'HEXDICOAACBP'	'hexdicoa[r] <=> hexdicoa[c] '	'FAO'	Acyl-CoA-binding protein	''	2	'1622.1'	'required for the production of C16DC. acyl coA binding protein is localized in cytosol, nucelus, golgi, E.R., mitochondrial inter memebrane space. In mitochondria its released when the integrity of the organelle is compromised. It has wide role in lipid metabolism, also acts as a coA transporter between different cellular compartments. can transport accumulated acyl coAs from cutosol into mitoch…	'PMID: 20511713, PMID: 11859412, PMID: 16908521, PMID: 8001684'
HEXDICOAACBPx	'HEXDICOAACBPx'	'hexdicoa[r] -> hexdicoa[x] '	'FAO'	Acyl-CoA-binding protein	''	2	'1622.1'	'required for the production of short chain DC in peroxisomes. Alternatively C16 DC can also be produced from C18DC and other higher DC. Peroxisomes does not contain ACBP, so this reaction is irrerversible'	'PMID: 20511713, PMID: 11859412, PMID: 16908521, PMID: 8001684'
HIVCACBP	'HIVCACBP'	'3ivcoa[m] <=> 3ivcoa[c] '	'FAO'	Acyl-CoA-binding protein	''	3	'1622.1'	'acyl coA binding protein is localized in cytosol, nucelus, golgi, E.R., mitochondrial inter memebrane space. In mitochondria its released when the integrity of the organelle is compromised. It has wide role in lipid metabolism, also acts as a coA transporter between different cellular compartments. can transport accumulated acyl coAs from cutosol into mitochondria for beta oxidation or into cyto…	'PMID: 20511713, PMID: 11859412, PMID: 16908521, PMID: 8001684'
HIVCRNe	'HIVCRNe'	'3ivcrn[c] -> 3ivcrn[e] '	'FAO'	0	''	2	''	'elevated in beta keto thiolase deficiency, multiple carboxylase deficiency, MHBD, 3-MCC, HMGcoa lyase deficiency and methyl-glutaconyl hydratase deficiency.'	'Jones LL, McDonald DA, Borum PR. (2010). Progress in Lipid Research 49: 61-75'
HOCDACBP	'HOCDACBP'	'3hodcoa[m] <=> 3hodcoa[c] '	'FAO'	Acyl-CoA-binding protein	''	3	'1622.1'	'acyl coA binding protein is localized in cytosol, nucelus, golgi, E.R., mitochondrial inter memebrane space. In mitochondria its released when the integrity of the organelle is compromised. It has wide role in lipid metabolism, also acts as a coA transporter between different cellular compartments. can transport accumulated acyl coAs from cutosol into mitochondria for beta oxidation or into cyto…	'PMID: 20511713, PMID: 11859412, PMID: 16908521, PMID: 8001684'
HOCTDACBP	'HOCTDACBP'	'3octdece1coa[m] <=> 3octdece1coa[c] '	'FAO'	Acyl-CoA-binding protein	''	3	'1622.1'	'acyl coA binding protein is localized in cytosol, nucelus, golgi, E.R., mitochondrial inter memebrane space. In mitochondria its released when the integrity of the organelle is compromised. It has wide role in lipid metabolism, also acts as a coA transporter between different cellular compartments. can transport accumulated acyl coAs from cutosol into mitochondria for beta oxidation or into cyto…	'PMID: 20511713, PMID: 11859412, PMID: 16908521, PMID: 8001684'
HOCTDEC2CRNe	'HOCTDEC2CRNe'	'3octdec2crn[c] -> 3octdec2crn[e] '	'FAO'	0	''	2	''	'detected in FAO disorders'	'Bodamer OA, Mühl A. (2005). Monatshefte für Chemie / Chemical Monthly 136: 1293-7, http://www.childrensmn.org/Manuals/Lab/Chemistry/051465.pdf'
HOCTDECCRNe	'HOCTDECCRNe'	'3octdeccrn[c] -> 3octdeccrn[e] '	'FAO'	0	''	2	''	'elevated in LCHAD and TFP deficiency.'	'Jones LL, McDonald DA, Borum PR. (2010). Progress in Lipid Research 49: 61-75'
HTDCACBP	'HTDCACBP'	'3htdcoa[m] <=> 3htdcoa[c] '	'FAO'	Acyl-CoA-binding protein	''	3	'1622.1'	'acyl coA binding protein is localized in cytosol, nucelus, golgi, E.R., mitochondrial inter memebrane space. In mitochondria its released when the integrity of the organelle is compromised. It has wide role in lipid metabolism, also acts as a coA transporter between different cellular compartments. can transport accumulated acyl coAs from cutosol into mitochondria for beta oxidation or into cyto…	'PMID: 20511713, PMID: 11859412, PMID: 16908521, PMID: 8001684'
HTDCRNe	'HTDCRNe'	'3tdcrn[c] -> 3tdcrn[e] '	'FAO'	0	''	2	''	'abnormal increased pattern in LCHAD.'	'PMID: 20583174'
IVCOAACBP	'IVCOAACBP'	'ivcoa[m] -> ivcoa[c] '	'FAO'	Acyl-CoA-binding protein	''	3	'1622.1'	'acyl coA binding protein is localized in cytosol, nucelus, golgi, E.R., mitochondrial inter memebrane space. In mitochondria its released when the integrity of the organelle is compromised. It has wide role in lipid metabolism, also acts as a coA transporter between different cellular compartments. can transport accumulated acyl coAs from cutosol into mitochondria for beta oxidation or into cyto…	'PMID: 20511713, PMID: 11859412, PMID: 16908521, PMID: 8001684'
IVCRNe	'IVCRNe'	'ivcrn[c] -> ivcrn[e] '	'FAO'	0	''	2	''	'elevated in beta kto thiolase deficiency, SCAD'	'Jones LL, McDonald DA, Borum PR. (2010). Progress in Lipid Research 49: 61-75'
LGNCCOAtcx	'LGNCCOAtcx'	'atp[c] + h2o[c] + lgnccoa[c] -> adp[c] + h[c] + lgnccoa[x] + pi[c] '	'Transport, Peroxisomal'	ATP-binding cassette sub-family D member 1,ATP-binding cassette sub-family D member 2	''	4	'(215.1 and 225.1)'	'4 peroxisomal transporters have been identified. ABCD1,ABCD2,PMP69 and PMP70.all are ABC half transporters, role of only ABCD1 has been characterized in details.role of ABCD2 identified recently in PMID: 18854420'	'PMID: 17039367,FEBS Volume 492, Issues 1-2, 9 March 2001, Pages 66-72-doi:10.1016/S0014-5793(01)02235-9(PMID: 11248239 ),PMID: 18854420'
NRVNCCOAtxc	'NRVNCCOAtxc'	'atp[c] + h2o[c] + nrvnccoa[c] -> adp[c] + h[c] + nrvnccoa[x] + pi[c] '	'Transport, Peroxisomal'	ATP-binding cassette sub-family D member 1,ATP-binding cassette sub-family D member 2	''	4	'(215.1 and 225.1)'	''	'PMID:18854420'
OCD11COACPT1	'OCD11COACPT1'	'crn[c] + octd11ecoa[c] <=> coa[c] + ocdececrn[c] '	'Carnitine shuttle'	Carnitine O-palmitoyltransferase 1, liver isoform,Carnitine O-palmitoyltransferase 1, muscle isoform,Carnitine O-palmitoyltransferase 1, brain isoform	'2.3.1.21'	4	'(1374.1 or 1375.1 or 126129.1)'	''	'Biochemica et Biophysica Acta 1486(2000) 1-17, Eur. J. Biochem. 244, 1-14 (1997) FEBS 1997, Biochemica et Biophysica Acta 1546(2001) 21-43.'
OCD11CRNCACT	'OCD11CRNCACT'	'ocdececrn[c] <=> ocdececrn[m] '	'Carnitine shuttle'	Mitochondrial carnitine/acylcarnitine carrier protein	''	4	'788.1'	''	'Biochemica et Biophysica Acta 1486(2000) 1-17, Eur. J. Biochem. 244, 1-14 (1997) FEBS 1997, Biochemica et Biophysica Acta 1546(2001) 21-43.'
OCD11CRNCPT2	'OCD11CRNCPT2'	'coa[m] + ocdececrn[m] <=> crn[m] + octd11ecoa[m] '	'Carnitine shuttle'	Carnitine O-palmitoyltransferase 2, mitochondrial	'2.3.1.21'	4	'1376.1'	''	'Biochemica et Biophysica Acta 1486(2000) 1-17, Eur. J. Biochem. 244, 1-14 (1997) FEBS 1997, Biochemica et Biophysica Acta 1546(2001) 21-43.'
OCT11EFATP	'OCT11EFATP'	'atp[c] + coa[c] + vacc[e] -> amp[c] + ppi[c] + octd11ecoa[c] '	'FAO'	Long-chain fatty acid transport protein 1 or Very long-chain acyl-CoA synthetase or Long-chain fatty acid transport protein 3 or Long-chain fatty acid transport protein 4 or Bile acyl-CoA synthetase or Long-chain fatty acid transport protein 6	'6.2.1.-, 6.2.1.3, 6.2.1.-, 6.2.1.-, 6.2.1.-, 6.2.1.7'	3	'(376497.1 or 11001.1 or 11000.1 or 10999.1 or 10998.1 or 28965.1)'	'fatty acid transport proteins mediate the uptake of long and very long chain fatty acids. These transport proteins are widely distributed and thought to possess fatty acid activating properties. May requires other proteins also.'	'PMID: 16868315, PMID: 17901542, journal of lipid research (2006) vol 47 page 665-672, 16357361, PMID: 17495600'
OCTDEC2ACBP	'OCTDEC2ACBP'	'3ocddcoa[m] <=> 3ocddcoa[c] '	'FAO'	Acyl-CoA-binding protein	''	3	'1622.1'	'acyl coA binding protein is localized in cytosol, nucelus, golgi, E.R., mitochondrial inter memebrane space. In mitochondria its released when the integrity of the organelle is compromised. It has wide role in lipid metabolism, also acts as a coA transporter between different cellular compartments. can transport accumulated acyl coAs from cutosol into mitochondria for beta oxidation or into cyto…	'PMID: 20511713, PMID: 11859412, PMID: 16908521, PMID: 8001684'
OCTDECCACT	'OCTDECCACT'	'octdececrn[c] <=> octdececrn[m] '	'FAO'	0	''	4	'(788.1)'	''	'Biochemica et Biophysica Acta 1486(2000) 1-17, Eur. J. Biochem. 244, 1-14 (1997) FEBS 1997, Biochemica et Biophysica Acta 1546(2001) 21-43.'
OCTDECCPT1	'OCTDECCPT1'	'crn[c] + octdececoa[c] <=> coa[c] + octdececrn[c] '	'FAO'	0	'2.3.1.21'	4	'(1374.1 or 1375.1 or 126129.1)'	''	'Biochemica et Biophysica Acta 1486(2000) 1-17, Eur. J. Biochem. 244, 1-14 (1997) FEBS 1997, Biochemica et Biophysica Acta 1546(2001) 21-43.'
OCTDECCPT2	'OCTDECCPT2'	'coa[m] + octdececrn[m] <=> crn[m] + octdececoa[m] '	'FAO'	0	'2.3.1.21'	4	'(1376.1)'	''	'Biochemica et Biophysica Acta 1486(2000) 1-17, Eur. J. Biochem. 244, 1-14 (1997) FEBS 1997, Biochemica et Biophysica Acta 1546(2001) 21-43.'
OCTDECE1CRNe	'OCTDECE1CRNe'	'3octdece1crn[c] -> 3octdece1crn[e] '	'FAO'	0	''	2	''	'elevated in LCHAD and TFP deficiency. '	'Jones LL, McDonald DA, Borum PR. (2010). Progress in Lipid Research 49: 61-75'
sink_octdececoa	OCTDECECOASINK'	'octdececoa[c] <=> '	'FAO'	0	''	1	''	''	''
OMHDEACIDTD	'OMHDEACIDTD'	'omhdecacid[r] <=> omhdecacid[c] '	'FAO'	0	''	2	''	'free fatty acids transported by simple diffusion, fatty acid transport proteins may be involved. Depends on the physiological concentration of these fatty acids.'	'PMID: 10331655, PMID: 11478366'
OMHDOCOSACTD	'OMHDOCOSACTD'	'omhdocosac[r] <=> omhdocosac[c] '	'FAO'	0	''	2	''	'free fatty acids transported by simple diffusion, fatty acid transport proteins may be involved. Depends on the physiological concentration of these fatty acids.'	'PMID: 10331655, PMID: 11478366'
OMHPALTD	'OMHPALTD'	'omhpal[r] <=> omhpal[c] '	'FAO'	0	''	2	''	'free fatty acids transported by simple diffusion, fatty acid transport proteins may be involved. Depends on the physiological concentration of these fatty acids.'	'PMID: 10331655, PMID: 11478366'
PRISTCOAtcx	'PRISTCOAtcx'	'atp[c] + h2o[c] + pristcoa[c] -> adp[c] + h[c] + pi[c] + pristcoa[x] '	'Transport, Peroxisomal'	ATP-binding cassette sub-family D member 3	''	4	'5825.1'	''	'PMID:11356164'
SBCOAACOTx	'SBCOAACOTx'	'h2o[x] + sbcoa[x] -> coa[x] + h[x] + subeac[x] '	'FAO'	Acyl-coenzyme A thioesterase 8	'3.1.2.27'	4	'10005.1'	'human peroxisomal thioesterases are ACOT-4 and ACOT-8. ACOT 4 is specific for C4DC and C5DC, where as ACOT-8 catalyzes wide range of substrates. One proton added to the product for balancing'	'PMID: 15007068, PMID: 18538142, Westin MAK, Hunt MC, Alexson SEH. (2005). Journal of Biological Chemistry 280: 38125-32'
SCP21cx	'SCP21cx'	'atp[c] + h2o[c] + phytcoa[c] -> adp[c] + h[c] + phytcoa[x] + pi[c] '	'Transport, Peroxisomal'	ATP-binding cassette sub-family D member 3	''	4	'5825.1'	'already present in recon 1 but without coupled atp hydrolysis'	'PMID:11356164'
SEBACACT	'SEBACACT'	'atp[c] + coa[c] + sebacid[c] -> amp[c] + ppi[c] + sebcoa[c] '	'FAO'	0	''	2	''	'dicarboxylic coa synthetase, origin and gene not known'	'Hunt MC, Alexson SEH. (2008). Progress in Lipid Research 47: 405-21'
SEBACIDTD	'SEBACIDTD'	'sebacid[x] <=> sebacid[c] '	'FAO'	0	''	2	''	'simple diffusion of fatty acids freely across membranes'	'Glatz JFC, Luiken JJFP, Bonen A. (2010). Physiological Reviews 90: 367-417, Kamp F, Hamilton JA. (2006). Prostaglandins, Leukotrienes and Essential Fatty Acids 75: 149-59, PMCID: PMC2785172, Evtodienko VY, Bondarenko DI, Antonenko YN. (1999). Biochimica et Biophysica Acta (BBA) - Biomembranes 1420: 95-103'
SEBCOACROT	'SEBCOACROT'	'crn[x] + sebcoa[x] <=> coa[x] + c10dc[x] '	'FAO'	0	'2.3.1.137'	3	'54677.1'	'alternatively peroxisomal carnitine O-octanoyltransferase may convert adipoyl coa into adipoyl carnitine and excreted out. Thioesterases and CRAT/CROT show same substrate specificty and similar Vmax and Km values, however author suggested there is no competition as they are expressed differentially in different tissues.'	'PMID: 15060085, Westin M, Hunt M, Alexson S. (2008). Cellular and Molecular Life Sciences 65: 982-90, PMID: 20560540'
SEBCOAPET	'SEBCOAPET'	'h2o[x] + sebcoa[x] -> coa[x] + h[x] + sebacid[x] '	'FAO'	Acyl-coenzyme A thioesterase 8	'3.1.2.27'	4	'10005.1'	'human peroxisomal thioesterases are ACOT-4 and ACOT-8. ACOT 4 is specific for C4DC and C5DC, where as ACOT-8 catalyzes wide range of substrates. One proton added to the product for balancing'	'PMID: 15007068, PMID: 18538142, Westin MAK, Hunt MC, Alexson SEH. (2005). Journal of Biological Chemistry 280: 38125-32'
STCOATxc	'STCOATxc'	'atp[c] + h2o[c] + stcoa[c] <=> adp[c] + h[c] + pi[c] + stcoa[x] '	'Transport, Peroxisomal'	ATP-binding cassette sub-family D member 1	''	4	'215.1'	'mentioned in recon1 as STCOAtx'	'Biochemica et Biophysica Acta 1486(2000) 1-17, Eur. J. Biochem. 244, 1-14 (1997) FEBS 1997, Biochemica et Biophysica Acta 1546(2001) 21-43.'
STRDNCCOAtxc	'STRDNCCOAtxc'	'atp[c] + h2o[c] + strdnccoa[c] -> adp[c] + h[c] + pi[c] + strdnccoa[x] '	'Transport, Peroxisomal'	ATP-binding cassette sub-family D member 1	''	4	'215.1'	''	'european journal of physiology(2007) 453:719-734'
SUBEACTD	'SUBEACTD'	'subeac[x] <=> subeac[c] '	'FAO'	0	''	2	''	'simple diffusion of fatty acids freely across membranes'	'Glatz JFC, Luiken JJFP, Bonen A. (2010). Physiological Reviews 90: 367-417, Kamp F, Hamilton JA. (2006). Prostaglandins, Leukotrienes and Essential Fatty Acids 75: 149-59, PMCID: PMC2785172, Evtodienko VY, Bondarenko DI, Antonenko YN. (1999). Biochimica et Biophysica Acta (BBA) - Biomembranes 1420: 95-103'
SUBERCACT	'SUBERCACT'	'c8dc[x] <=> c8dc[c] '	'FAO'	0	''	2	'788.1'	'acyl carnitines transported by CACT.'	'Westin M, Hunt M, Alexson S. (2008). Cellular and Molecular Life Sciences 65: 982-90. doi:10.1006/mgme.2000.3055,doi:10.1006/bbrc.1999.1340,biochimica et biophysica acta 1546 (2001) 21-43'
SUBERCROT	'SUBERCROT'	'crn[x] + sbcoa[x] <=> coa[x] + c8dc[x] '	'FAO'	0	'2.3.1.137'	3	'54677.1'	'alternatively peroxisomal carnitine O-octanoyltransferase may convert adipoyl coa into adipoyl carnitine and excreted out. Thioesterases and CRAT/CROT show same substrate specificty and similar Vmax and Km values, however author suggested there is no competition as they are expressed differentially in different tissues.'	'PMID: 15060085, Westin M, Hunt M, Alexson S. (2008). Cellular and Molecular Life Sciences 65: 982-90, PMID: 20560540'
SUBERICACT	'SUBERICACT'	'atp[c] + coa[c] + subeac[c] -> amp[c] + ppi[c] + sbcoa[c] '	'FAO'	0	''	2	''	'dicarboxylic coa synthetase, origin and gene not known'	'Hunt MC, Alexson SEH. (2008). Progress in Lipid Research 47: 405-21'
SUCCACT	'SUCCACT'	'atp[c] + coa[c] + succ[c] -> amp[c] + ppi[c] + succoa[c] '	'FAO'	0	''	2	''	'dicarboxylic coa synthetase, origin and gene not known'	'Hunt MC, Alexson SEH. (2008). Progress in Lipid Research 47: 405-21'
SUCCCROT	'SUCCCROT'	'crn[x] + succoa[x] <=> coa[x] + c4dc[x] '	'FAO'	0	'2.3.1.137'	3	'54677.1'	'alternatively peroxisomal carnitine O-octanoyltransferase may convert adipoyl coa into adipoyl carnitine and excreted out. Thioesterases and CRAT/CROT show same substrate specificty and similar Vmax and Km values, however author suggested there is no competition as they are expressed differentially in different tissues.'	'PMID: 15060085, Westin M, Hunt M, Alexson S. (2008). Cellular and Molecular Life Sciences 65: 982-90, PMID: 20560540'
SUCCOAPET	'SUCCOAPET'	'h2o[x] + succoa[x] -> coa[x] + h[x] + succ[x] '	'FAO'	Acyl-coenzyme A thioesterase 8	'3.1.2.27'	4	'(122970.1 or 10005.1)'	'human peroxisomal thioesterases are ACOT-4 and ACOT-8. ACOT 4 is specific for C4DC and C5DC, where as ACOT-8 catalyzes wide range of substrates. One proton added to the product for balancing'	'PMID: 15007068, PMID: 18538142, Westin MAK, Hunt MC, Alexson SEH. (2005). Journal of Biological Chemistry 280: 38125-32'
SUCCTD	'SUCCTD'	'succ[x] <=> succ[c] '	'FAO'	0	''	2	''	'simple diffusion of fatty acids freely across membranes'	'Glatz JFC, Luiken JJFP, Bonen A. (2010). Physiological Reviews 90: 367-417, Kamp F, Hamilton JA. (2006). Prostaglandins, Leukotrienes and Essential Fatty Acids 75: 149-59, PMCID: PMC2785172, Evtodienko VY, Bondarenko DI, Antonenko YN. (1999). Biochimica et Biophysica Acta (BBA) - Biomembranes 1420: 95-103'
TDCRNe	'TDCRNe'	'tdcrn[c] -> tdcrn[e] '	'FAO'	0	''	2	''	'elevated in VLCAD'	'Jones LL, McDonald DA, Borum PR. (2010). Progress in Lipid Research 49: 61-75'
sink_tetdec2coa	TETDEC2COASINK'	'tetdec2coa[c] <=> '	'FAO'	0	''	1	''	''	''
TETDEC2CRNe	'TETDEC2CRNe'	'tetdec2crn[c] -> tetdec2crn[e] '	'FAO'	0	''	2	''	'elevated in VLCAD'	'Jones LL, McDonald DA, Borum PR. (2010). Progress in Lipid Research 49: 61-75'
sink_tetdece1coa	TETDECE1COASINK'	'tetdece1coa[c] <=> '	'FAO'	0	''	1	''	''	''
TETDECE1CRNe	'TETDECE1CRNe'	'tetdece1crn[c] -> tetdece1crn[e] '	'FAO'	0	''	2	''	'elevated in VLCAD'	'Jones LL, McDonald DA, Borum PR. (2010). Progress in Lipid Research 49: 61-75'
TIGCRNe	'TIGCRNe'	'c51crn[c] -> c51crn[e] '	'FAO'	0	''	2	''	'beta keto thiolase deficiency, urine analysis shows high levels of tiglyl carnitine. Flushed out of the body and excreted in the urine. '	'PMID: 20157782'
Abbv of irrversible rxns in Recon 1	Reaction Abbreviation	Reaction Name	Reaction formula	Subsystem	Protein	EC Number	Confidence score	GPR	Notes	Physiological Evidence
ADRNCPT1	ADRCOACPT1	'transport of adrenyl coenzyme A into mitochondrial matrix'	'adrncoa[c] + crn[c] <=> coa[c] + adrncrn[c] '	'Carnitine shuttle'	Carnitine O-palmitoyltransferase 1, liver isoform,Carnitine O-palmitoyltransferase 1, muscle isoform,Carnitine O-palmitoyltransferase 1, brain isoform	'2.3.1.21'	4	'(1374.1 or 1375.1 or 126129.1)'	in recon1 ADRNCPT1'	'Biochemica et Biophysica Acta 1486(2000) 1-17, Eur. J. Biochem. 244, 1-14 (1997) FEBS 1997, Biochemica et Biophysica Acta 1546(2001) 21-43.'
ADRNCRNt	ADRCRNCACT	'transport of adrenyl coenzyme A into mitochondrial matrix'	'adrncrn[c] <=> adrncrn[m] '	'Carnitine shuttle'	Mitochondrial carnitine/acylcarnitine carrier protein	''	4	'788.1'	in recon1 ADRNCRNt'	'Biochemica et Biophysica Acta 1486(2000) 1-17, Eur. J. Biochem. 244, 1-14 (1997) FEBS 1997, Biochemica et Biophysica Acta 1546(2001) 21-43.'
ADRNCPT2	ADRCRNCPT2	'transport of adrenyl coenzyme A into mitochondrial matrix'	'adrncrn[m] + coa[m] <=> adrncoa[m] + crn[m] '	'Carnitine shuttle'	Carnitine O-palmitoyltransferase 2, mitochondrial	'2.3.1.21'	4	'1376.1'	in recon 1 ADRNCPT2'	'Biochemica et Biophysica Acta 1486(2000) 1-17, Eur. J. Biochem. 244, 1-14 (1997) FEBS 1997, Biochemica et Biophysica Acta 1546(2001) 21-43.'
LNLNCACPT1	ALNLNCOACPT1	'transport of alpha-linolenyl carnitine into the mitochondrial matrix'	'crn[c] + lnlncacoa[c] <=> coa[c] + lnlncacrn[c] '	'Carnitine shuttle'	Carnitine O-palmitoyltransferase 1, liver isoform,Carnitine O-palmitoyltransferase 1, muscle isoform,Carnitine O-palmitoyltransferase 1, brain isoform	'2.3.1.21'	4	'(1374.1 or 1375.1 or 126129.1)'	mentioned in recon 1 as LNLNCACPT1'	'Biochemica et Biophysica Acta 1486(2000) 1-17, Eur. J. Biochem. 244, 1-14 (1997) FEBS 1997, Biochemica et Biophysica Acta 1546(2001) 21-43.'
LNLNCACRNt	ALNLNCRNCACT	'transport of alpha-linolenyl carnitine into the mitochondrial matrix'	'lnlncacrn[c] <=> lnlncacrn[m] '	'Carnitine shuttle'	Mitochondrial carnitine/acylcarnitine carrier protein	''	4	'788.1'	in recon 1 LNLNCACRNt'	'Biochemica et Biophysica Acta 1486(2000) 1-17, Eur. J. Biochem. 244, 1-14 (1997) FEBS 1997, Biochemica et Biophysica Acta 1546(2001) 21-43.'
LNLNCACPT2	ALNLNCRNCPT2	'transport of alpha-linolenyl carnitine into the mitochondrial matrix'	'coa[m] + lnlncacrn[m] <=> crn[m] + lnlncacoa[m] '	'Carnitine shuttle'	Carnitine O-palmitoyltransferase 2, mitochondrial	'2.3.1.21'	4	'1376.1'	'mentioned in recon1 as LNLNCACPT2'	'Biochemica et Biophysica Acta 1486(2000) 1-17, Eur. J. Biochem. 244, 1-14 (1997) FEBS 1997, Biochemica et Biophysica Acta 1546(2001) 21-43.'
ARACHCPT1	ARCOACPT1	'transport of arachidyl CoA into mitochondrial matrix'	'crn[c] + arachcoa[c] <=> coa[c] + arachcrn[c] '	'Carnitine shuttle'	Carnitine O-palmitoyltransferase 1, liver isoform,Carnitine O-palmitoyltransferase 1, muscle isoform,Carnitine O-palmitoyltransferase 1, brain isoform	'2.3.1.21'	4	'(1374.1 or 1375.1 or 126129.1)'	'in recon1 ARACHCPT1'	'Biochemica et Biophysica Acta 1486(2000) 1-17, Eur. J. Biochem. 244, 1-14 (1997) FEBS 1997, Biochemica et Biophysica Acta 1546(2001) 21-43.'
ARACHCRNt	ARCRNCACT	'transport of arachidyl CoA into mitochondrial matrix'	'arachcrn[c] <=> arachcrn[m] '	'Carnitine shuttle'	Mitochondrial carnitine/acylcarnitine carrier protein	''	4	'788.1'	'in recon1 ARACHCRNt'	'Biochemica et Biophysica Acta 1486(2000) 1-17, Eur. J. Biochem. 244, 1-14 (1997) FEBS 1997, Biochemica et Biophysica Acta 1546(2001) 21-43.'
ARACHCPT2	ARCRNCPT2	'transport of arachidyl CoA into mitochondrial matrix'	'coa[m] + arachcrn[m] <=> crn[m] + arachcoa[m] '	'Carnitine shuttle'	Carnitine O-palmitoyltransferase 2, mitochondrial	'2.3.1.21'	4	'1376.1'	'in recon1 ARACHCPT2'	'Biochemica et Biophysica Acta 1486(2000) 1-17, Eur. J. Biochem. 244, 1-14 (1997) FEBS 1997, Biochemica et Biophysica Acta 1546(2001) 21-43.'
C204CPT1	ARHDCOACPT1	'transport of arachdcoa into mitochondrial matrix'	'crn[c] + arachdcoa[c] <=> coa[c] + arachdcrn[c] '	'Carnitine shuttle'	Carnitine O-palmitoyltransferase 1, liver isoform,Carnitine O-palmitoyltransferase 1, muscle isoform,Carnitine O-palmitoyltransferase 1, brain isoform	'2.3.1.21'	4	'(1374.1 or 1375.1 or 126129.1)'	'in recon 1 C204CPT1'	'Biochemica et Biophysica Acta 1486(2000) 1-17, Eur. J. Biochem. 244, 1-14 (1997) FEBS 1997, Biochemica et Biophysica Acta 1546(2001) 21-43.'
EICOSTETCRNt	ARHDCRNCACT	'transport of arachdcoa into mitochondrial matrix'	'arachdcrn[c] <=> arachdcrn[m] '	'Carnitine shuttle'	Mitochondrial carnitine/acylcarnitine carrier protein	''	4	'788.1'	'in recon1 EICOSTETCRNt. Arachidonic acid and eicosatetraenoic acid are the same'	'Biochemica et Biophysica Acta 1486(2000) 1-17, Eur. J. Biochem. 244, 1-14 (1997) FEBS 1997, Biochemica et Biophysica Acta 1546(2001) 21-43.'
C204CPT2	ARHDCRNCPT2	'transport of arachdcoa into mitochondrial matrix'	'coa[m] + arachdcrn[m] <=> crn[m] + arachdcoa[m] '	'Carnitine shuttle'	Carnitine O-palmitoyltransferase 2, mitochondrial	'2.3.1.21'	4	'1376.1'	'in recon1 C204CPT2'	'Biochemica et Biophysica Acta 1486(2000) 1-17, Eur. J. Biochem. 244, 1-14 (1997) FEBS 1997, Biochemica et Biophysica Acta 1546(2001) 21-43.'
C160CPT1	C160CPT1c	'production of Palmitoylcarnitine'	'crn[c] + pmtcoa[c] <=> coa[c] + pmtcrn[c] '	'Carnitine shuttle'	Carnitine O-palmitoyltransferase 1, liver isoform,Carnitine O-palmitoyltransferase 1, muscle isoform,Carnitine O-palmitoyltransferase 1, brain isoform	'2.3.1.21'	4	'(1374.1 or 1375.1 or 126129.1)'	'mentioned in recon1 as C160CPT1'	'PMID: 20392676, PMID: 20070908'
C161CRNt	C161CACT	'transport of Hexadecenoyl-CoA into mitochondrial matrix'	'hdcecrn[c] <=> hdcecrn[m] '	'Carnitine shuttle'	Mitochondrial carnitine/acylcarnitine carrier protein	''	4	'788.1'	'in recon1 C161CRNt'	'Biochemica et Biophysica Acta 1486(2000) 1-17, Eur. J. Biochem. 244, 1-14 (1997) FEBS 1997, Biochemica et Biophysica Acta 1546(2001) 21-43.'
C161CPT1	C161CPT1c	'production of palmitoleoylcarnitine'	crn[c] + hdcoa[c] <=> coa[c] + hdcecrn[c] '	'FAO'	Carnitine O-palmitoyltransferase 1, liver isoform,Carnitine O-palmitoyltransferase 1, muscle isoform,Carnitine O-palmitoyltransferase 1, brain isoform	'2.3.1.21'	4	'(1374.1 or 1375.1 or 126129.1)'	'in recon1 C161CPT1'	'Biochem. J. (1996) 319 (633?640)'
C161CPT2	C161CPT2m	'transport of Hexadecenoyl-CoA into mitochondrial matrix'	'coa[m] + hdcecrn[m] <=> crn[m] + hdcoa[m] '	'Carnitine shuttle'	Carnitine O-palmitoyltransferase 2, mitochondrial	'2.3.1.21'	4	'1376.1'	'in recon1 C161CPT2'	'Biochemica et Biophysica Acta 1486(2000) 1-17, Eur. J. Biochem. 244, 1-14 (1997) FEBS 1997, Biochemica et Biophysica Acta 1546(2001) 21-43.'
C181CRNt	C181CACT	'transport of Octadecenoyl-CoA into mitochondrial matrix'	'odecrn[c] <=> odecrn[m] '	'Carnitine shuttle'	Mitochondrial carnitine/acylcarnitine carrier protein	''	4	'788.1'	'in recon1 C181CRNt'	'Biochemica et Biophysica Acta 1486(2000) 1-17, Eur. J. Biochem. 244, 1-14 (1997) FEBS 1997, Biochemica et Biophysica Acta 1546(2001) 21-43.'
C181CPT1	C181CPT1c	'transport of Octadecenoyl-CoA into mitochondrial matrix'	'crn[c] + odecoa[c] <=> coa[c] + odecrn[c] '	'Carnitine shuttle'	Carnitine O-palmitoyltransferase 1, liver isoform,Carnitine O-palmitoyltransferase 1, muscle isoform,Carnitine O-palmitoyltransferase 1, brain isoform	'2.3.1.21'	4	'(1374.1 or 1375.1 or 126129.1)'	'in recon1 C181CPT1'	'Biochemica et Biophysica Acta 1486(2000) 1-17, Eur. J. Biochem. 244, 1-14 (1997) FEBS 1997, Biochemica et Biophysica Acta 1546(2001) 21-43.'
C181CPT2	C181CPT2m	'transport of Octadecenoyl-CoA into mitochondrial matrix'	'coa[m] + odecrn[m] <=> crn[m] + odecoa[m] '	'Carnitine shuttle'	Carnitine O-palmitoyltransferase 2, mitochondrial	'2.3.1.21'	4	'1376.1'	'in recon1 C181CPT2'	'Biochemica et Biophysica Acta 1486(2000) 1-17, Eur. J. Biochem. 244, 1-14 (1997) FEBS 1997, Biochemica et Biophysica Acta 1546(2001) 21-43.'
C226CPT1	C226COACPT1	'transport of cervonyl coenzyme A into mitochondrial matrix'	'crn[c] + c226coa[c] <=> coa[c] + c226crn[c] '	'Carnitine shuttle'	Carnitine O-palmitoyltransferase 1, liver isoform,Carnitine O-palmitoyltransferase 1, muscle isoform,Carnitine O-palmitoyltransferase 1, brain isoform	'2.3.1.21'	4	'(1374.1 or 1375.1 or 126129.1)'	'in recon 1 C226CPT1'	'Biochemica et Biophysica Acta 1486(2000) 1-17, Eur. J. Biochem. 244, 1-14 (1997) FEBS 1997, Biochemica et Biophysica Acta 1546(2001) 21-43.'
C226CRNt	C226CRNCACT	'transport of cervonyl coenzyme A into mitochondrial matrix'	c226crn[c] <=> c226crn[m] '	'Carnitine shuttle'	Mitochondrial carnitine/acylcarnitine carrier protein	''	4	'788.1'	''	'Biochemica et Biophysica Acta 1486(2000) 1-17, Eur. J. Biochem. 244, 1-14 (1997) FEBS 1997, Biochemica et Biophysica Acta 1546(2001) 21-43.'
C226CPT2	C226CRNCPT2	'transport of cervonyl coenzyme A into mitochondrial matrix'	'coa[m] + c226crn[m] <=> crn[m] + c226coa[m] '	'Carnitine shuttle'	Carnitine O-palmitoyltransferase 2, mitochondrial	'2.3.1.21'	4	'1376.1'	'in recon 1 C226CPT2'	'Biochemica et Biophysica Acta 1486(2000) 1-17, Eur. J. Biochem. 244, 1-14 (1997) FEBS 1997, Biochemica et Biophysica Acta 1546(2001) 21-43.'
ACRNtm	C2tmc	'transport of acetylcarnitine from cytosol to mitochondrial inner matrix'	'acrn[c] <=> acrn[m] '	'transport, mitochondrial'	Mitochondrial carnitine/acylcarnitine carrier protein	''	4	'788.1'	'in recon1 ACRNtm'	'biochimica et biophysica acta 1546(2001)21-43'
PCRNtc	C3tcx	'transport of propionylcarnitine to cytosol'	pcrn[x] <=> pcrn[c] '	'Transport, Peroxisomal'	Mitochondrial carnitine/acylcarnitine carrier protein	''	4	'788.1'	'after formation of propionylcarnitine in peroxisomes in recon1 reaction CSNAT3x, it is transported out into cytosol. It should be noted however that small and medium chain acylcoa can aslo diffuse accross the memebrane without the need of a transporter.'	'biochemical and biophysical research communications 263,213-218(1999), PMID: 7654220'
PCRNtm	C3tmc	'transport of propionylcarnitine to mitochondrial matrix'	'pcrn[c] <=> pcrn[m] '	'transport, mitochondrial'	Mitochondrial carnitine/acylcarnitine carrier protein	''	4	'788.1'	''	'biochimica et biophysica acta 1546(2001)21-43'
DCSPTN1CPT1	DCPCOACPT1	'transport of docosa-4,7,10,13,16-pentaenoyl coenzyme A into mitochondrial matrix'	'crn[c] + dcsptn1coa[c] <=> coa[c] + dcsptn1crn[c] '	'Carnitine shuttle'	Carnitine O-palmitoyltransferase 1, liver isoform,Carnitine O-palmitoyltransferase 1, muscle isoform,Carnitine O-palmitoyltransferase 1, brain isoform	'2.3.1.21'	4	'(1374.1 or 1375.1 or 126129.1)'	'in recon 1 DCSPTN1CPT1'	'Biochemica et Biophysica Acta 1486(2000) 1-17, Eur. J. Biochem. 244, 1-14 (1997) FEBS 1997, Biochemica et Biophysica Acta 1546(2001) 21-43.'
DCSPTN1CRNt	DCPCRNCACT	'transport of docosa-4,7,10,13,16-pentaenoyl coenzyme A into mitochondrial matrix'	'dcsptn1crn[c] <=> dcsptn1crn[m] '	'Carnitine shuttle'	Mitochondrial carnitine/acylcarnitine carrier protein	''	4	'788.1'	'in recon1 DCSPTN1CRNt'	'Biochemica et Biophysica Acta 1486(2000) 1-17, Eur. J. Biochem. 244, 1-14 (1997) FEBS 1997, Biochemica et Biophysica Acta 1546(2001) 21-43.'
DCSPTN1CPT2	DCPCRNCPT2	'transport of docosa-4,7,10,13,16-pentaenoyl coenzyme A into mitochondrial matrix'	'coa[m] + dcsptn1crn[m] <=> crn[m] + dcsptn1coa[m] '	'Carnitine shuttle'	Carnitine O-palmitoyltransferase 2, mitochondrial	'2.3.1.21'	4	'1376.1'	'in recon 1 DCSPTN1CPT2'	'Biochemica et Biophysica Acta 1486(2000) 1-17, Eur. J. Biochem. 244, 1-14 (1997) FEBS 1997, Biochemica et Biophysica Acta 1546(2001) 21-43.'
DLNLCGCPT1	DGLCOACPT1	'transport of dihomo-gamma-linolenyl coenzyme A into mitochondrial matrix'	'crn[c] + dlnlcgcoa[c] <=> coa[c] + dlnlcgcrn[c] '	'Carnitine shuttle'	Carnitine O-palmitoyltransferase 1, liver isoform,Carnitine O-palmitoyltransferase 1, muscle isoform,Carnitine O-palmitoyltransferase 1, brain isoform	'2.3.1.21'	4	'(1374.1 or 1375.1 or 126129.1)'	'in recon1 DLNLCGCPT1'	'Biochemica et Biophysica Acta 1486(2000) 1-17, Eur. J. Biochem. 244, 1-14 (1997) FEBS 1997, Biochemica et Biophysica Acta 1546(2001) 21-43.'
DLNLCGCRNt	DGLCRNCACT	'transport of dihomo-gamma-linolenyl coenzyme A into mitochondrial matrix'	'dlnlcgcrn[c] <=> dlnlcgcrn[m] '	'Carnitine shuttle'	Mitochondrial carnitine/acylcarnitine carrier protein	''	4	'788.1'	'in recon1 DLNLCGCRNt'	'Biochemica et Biophysica Acta 1486(2000) 1-17, Eur. J. Biochem. 244, 1-14 (1997) FEBS 1997, Biochemica et Biophysica Acta 1546(2001) 21-43.'
DLNLCGCPT2	DGLCRNCPT2	'transport of dihomo-gamma-linolenyl coenzyme A into mitochondrial matrix'	'coa[m] + dlnlcgcrn[m] <=> crn[m] + dlnlcgcoa[m] '	'Carnitine shuttle'	Carnitine O-palmitoyltransferase 2, mitochondrial	'2.3.1.21'	4	'1376.1'	'in recon1 DLNLCGCPT2'	'Biochemica et Biophysica Acta 1486(2000) 1-17, Eur. J. Biochem. 244, 1-14 (1997) FEBS 1997, Biochemica et Biophysica Acta 1546(2001) 21-43.'
ELAIDCPT1	ELAIDCPT1c	'production of Elaidic carnitine'	crn[c] + od2coa[c] <=> coa[c] + elaidcrn[c] '	'Carnitine shuttle'	Carnitine O-palmitoyltransferase 1, liver isoform,Carnitine O-palmitoyltransferase 1, muscle isoform,Carnitine O-palmitoyltransferase 1, brain isoform	'2.3.1.21'	4	'(1374.1 or 1375.1 or 126129.1)'	''	'PMID: 20508999, PMID: 10443971, PMID: 444549 '
LNLNCGCPT1	GLNLNCOACPT1	'transport of gamma-linolenyl carnitine into the mitochondrial matrix'	'crn[c] + lnlncgcoa[c] <=> coa[c] + lnlncgcrn[c] '	'Carnitine shuttle'	Carnitine O-palmitoyltransferase 1, liver isoform,Carnitine O-palmitoyltransferase 1, muscle isoform,Carnitine O-palmitoyltransferase 1, brain isoform	'2.3.1.21'	4	'(1374.1 or 1375.1 or 126129.1)'	'mentioned in recon1 as LNLNCGCPT1'	'Biochemica et Biophysica Acta 1486(2000) 1-17, Eur. J. Biochem. 244, 1-14 (1997) FEBS 1997, Biochemica et Biophysica Acta 1546(2001) 21-43.'
LNLNCGCRNt	GLNLNCRNCACT	'transport of gamma-linolenyl carnitine into the mitochondrial matrix'	'lnlncgcrn[c] <=> lnlncgcrn[m] '	'Carnitine shuttle'	Mitochondrial carnitine/acylcarnitine carrier protein	''	4	'788.1'	'in recon 1 LNLNCGCRNt'	'Biochemica et Biophysica Acta 1486(2000) 1-17, Eur. J. Biochem. 244, 1-14 (1997) FEBS 1997, Biochemica et Biophysica Acta 1546(2001) 21-43.'
LNLNCGCPT2	GLNLNCRNCPT2	'transport of gamma-linolenyl carnitine into the mitochondrial matrix'	'coa[m] + lnlncgcrn[m] <=> crn[m] + lnlncgcoa[m] '	'Carnitine shuttle'	Carnitine O-palmitoyltransferase 2, mitochondrial	'2.3.1.21'	4	'1376.1'	'mentioned in recon1 as LNLNCGCPT2'	'Biochemica et Biophysica Acta 1486(2000) 1-17, Eur. J. Biochem. 244, 1-14 (1997) FEBS 1997, Biochemica et Biophysica Acta 1546(2001) 21-43.'
HPDCACRNCPT1	HPDCOACPT1	'transport of heptadecanoyl CoA into mitochondrial matrix'	'crn[c] + hpdcacoa[c] <=> coa[c] + hpdcacrn[c] '	'Carnitine shuttle'	Carnitine O-palmitoyltransferase 1, liver isoform,Carnitine O-palmitoyltransferase 1, muscle isoform,Carnitine O-palmitoyltransferase 1, brain isoform	'2.3.1.21'	4	'(1374.1 or 1375.1 or 126129.1)'	'in recon1 as HPDCACRNCPT1'	'Biochemica et Biophysica Acta 1486(2000) 1-17, Eur. J. Biochem. 244, 1-14 (1997) FEBS 1997, Biochemica et Biophysica Acta 1546(2001) 21-43.'
HPDCACRNt	HPDCRNCACT	'transport of heptadecanoyl CoA into mitochondrial matrix'	'hpdcacrn[c] <=> hpdcacrn[m] '	'Carnitine shuttle'	Mitochondrial carnitine/acylcarnitine carrier protein	''	4	'788.1'	'in recon 1 HPDCACRNt'	'Biochemica et Biophysica Acta 1486(2000) 1-17, Eur. J. Biochem. 244, 1-14 (1997) FEBS 1997, Biochemica et Biophysica Acta 1546(2001) 21-43.'
HPDCACRNCPT2	HPDCRNCPT2	'transport of heptadecanoyl CoA into mitochondrial matrix'	'coa[m] + hpdcacrn[m] <=> crn[m] + hpdcacoa[m] '	'Carnitine shuttle'	Carnitine O-palmitoyltransferase 2, mitochondrial	'2.3.1.21'	4	'1376.1'	'mentioned in recon1 HPDCACRNCPT2'	'Biochemica et Biophysica Acta 1486(2000) 1-17, Eur. J. Biochem. 244, 1-14 (1997) FEBS 1997, Biochemica et Biophysica Acta 1546(2001) 21-43.'
LNELDCCPT1	LNELDCCPT1c	'production of Linoelaidyl carnitine'	crn[c] + lneldccoa[c] <=> coa[c] + lneldccrn[c] '	'Carnitine shuttle'	Carnitine O-palmitoyltransferase 1, liver isoform,Carnitine O-palmitoyltransferase 1, muscle isoform,Carnitine O-palmitoyltransferase 1, brain isoform	'2.3.1.21'	4	'(1374.1 or 1375.1 or 126129.1)'	''	'Biochem. J. (1989) 263 (867?873)'
LNELDCCPT1	LNELDCOACPT1	'transport of Linoelaidyl carnitine into the mitochondrial matrix'	'crn[c] + lneldccoa[c] <=> coa[c] + lneldccrn[c] '	'Carnitine shuttle'	Carnitine O-palmitoyltransferase 1, liver isoform,Carnitine O-palmitoyltransferase 1, muscle isoform,Carnitine O-palmitoyltransferase 1, brain isoform	'2.3.1.21'	4	'(1374.1 or 1375.1 or 126129.1)'	'mentioned in recon1 as LNELDCCPT1'	'Biochemica et Biophysica Acta 1486(2000) 1-17, Eur. J. Biochem. 244, 1-14 (1997) FEBS 1997, Biochemica et Biophysica Acta 1546(2001) 21-43.'
LNELDCCRNt	LNELDCRNCACT	'transport of Linoelaidyl carnitine into the mitochondrial matrix'	'lneldccrn[c] <=> lneldccrn[m] '	'Carnitine shuttle'	Mitochondrial carnitine/acylcarnitine carrier protein	''	4	'788.1'	'in recon 1 LNELDCCRNt'	'Biochemica et Biophysica Acta 1486(2000) 1-17, Eur. J. Biochem. 244, 1-14 (1997) FEBS 1997, Biochemica et Biophysica Acta 1546(2001) 21-43.'
LNELDCCPT2	LNELDCRNCPT2	'transport of Linoelaidyl carnitine into the mitochondrial matrix'	'coa[m] + lneldccrn[m] <=> crn[m] + lneldccoa[m] '	'Carnitine shuttle'	Carnitine O-palmitoyltransferase 2, mitochondrial	'2.3.1.21'	4	'1376.1'	'mentioned in recon1 as LNELDCCPT2'	'Biochemica et Biophysica Acta 1486(2000) 1-17, Eur. J. Biochem. 244, 1-14 (1997) FEBS 1997, Biochemica et Biophysica Acta 1546(2001) 21-43.'
LNLCCPT1	LNLCCOACPT1	'transport of Linoleyl carnitine into the mitochondrial matrix'	'crn[c] + lnlccoa[c] <=> coa[c] + lnlccrn[c] '	'Carnitine shuttle'	Carnitine O-palmitoyltransferase 1, liver isoform,Carnitine O-palmitoyltransferase 1, muscle isoform,Carnitine O-palmitoyltransferase 1, brain isoform	'2.3.1.21'	4	'(1374.1 or 1375.1 or 126129.1)'	'mentioned in recon 1 as LNLCCPT1'	'Biochemica et Biophysica Acta 1486(2000) 1-17, Eur. J. Biochem. 244, 1-14 (1997) FEBS 1997, Biochemica et Biophysica Acta 1546(2001) 21-43.'
LNLCCRNt	LNLCCRNCACT	'transport of Linoleyl carnitine into the mitochondrial matrix'	'lnlccrn[c] <=> lnlccrn[m] '	'Carnitine shuttle'	Mitochondrial carnitine/acylcarnitine carrier protein	''	4	'788.1'	'in recon1 LNLCCRNt'	'Biochemica et Biophysica Acta 1486(2000) 1-17, Eur. J. Biochem. 244, 1-14 (1997) FEBS 1997, Biochemica et Biophysica Acta 1546(2001) 21-43.'
LNLCCPT2	LNLCCRNCPT2	'transport of Linoleyl carnitine into the mitochondrial matrix'	'coa[m] + lnlccrn[m] <=> crn[m] + lnlccoa[m] '	'Carnitine shuttle'	Carnitine O-palmitoyltransferase 2, mitochondrial	'2.3.1.21'	4	'1376.1'	'mentioned in recon1 as LNLCCPT2'	'Biochemica et Biophysica Acta 1486(2000) 1-17, Eur. J. Biochem. 244, 1-14 (1997) FEBS 1997, Biochemica et Biophysica Acta 1546(2001) 21-43.'
PTDCACRNCPT1	PDCOACPT1	'transport of pentadecanoyl-CoA into mitochondrial matrix'	'crn[c] + ptdcacoa[c] <=> coa[c] + ptdcacrn[c] '	'Carnitine shuttle'	Carnitine O-palmitoyltransferase 1, liver isoform,Carnitine O-palmitoyltransferase 1, muscle isoform,Carnitine O-palmitoyltransferase 1, brain isoform	'2.3.1.21'	4	'(1374.1 or 1375.1 or 126129.1)'	'mentioned in recon1 as PTDCACRNCPT1'	'Biochemica et Biophysica Acta 1486(2000) 1-17, Eur. J. Biochem. 244, 1-14 (1997) FEBS 1997, Biochemica et Biophysica Acta 1546(2001) 21-43.'
PTDCACRNt	PDCRNCACT	'transport of pentadecanoyl-CoA into mitochondrial matrix'	'ptdcacrn[c] <=> ptdcacrn[m] '	'Carnitine shuttle'	Mitochondrial carnitine/acylcarnitine carrier protein	''	4	'788.1'	'in recon 1 PTDCACRNt'	'Biochemica et Biophysica Acta 1486(2000) 1-17, Eur. J. Biochem. 244, 1-14 (1997) FEBS 1997, Biochemica et Biophysica Acta 1546(2001) 21-43.'
PTDCACRNCPT2	PDCRNCPT2	'transport of pentadecanoyl-CoA into mitochondrial matrix'	'coa[m] + ptdcacrn[m] <=> crn[m] + ptdcacoa[m] '	'Carnitine shuttle'	Carnitine O-palmitoyltransferase 2, mitochondrial	'2.3.1.21'	4	'1376.1'	'mentioned in recon1 as PTDCACRNCPT2'	'Biochemica et Biophysica Acta 1486(2000) 1-17, Eur. J. Biochem. 244, 1-14 (1997) FEBS 1997, Biochemica et Biophysica Acta 1546(2001) 21-43.'
C160CRNt	PMCRNCACT	'transport of Palmitoyl CoA into mitochondrial matrix'	'pmtcrn[c] <=> pmtcrn[m] '	'Carnitine shuttle'	Mitochondrial carnitine/acylcarnitine carrier protein	''	4	'788.1'	'in recon1 C160CRNt'	'Biochemica et Biophysica Acta 1486(2000) 1-17, Eur. J. Biochem. 244, 1-14 (1997) FEBS 1997, Biochemica et Biophysica Acta 1546(2001) 21-43.'
C160CPT2	PMCRNCPT2	'transport of Palmitoyl CoA into mitochondrial matrix'	'coa[m] + pmtcrn[m] <=> crn[m] + pmtcoa[m] '	'Carnitine shuttle'	Carnitine O-palmitoyltransferase 2, mitochondrial	'2.3.1.21'	4	'1376.1'	'in recon1 C160CPT2'	'Biochemica et Biophysica Acta 1486(2000) 1-17, Eur. J. Biochem. 244, 1-14 (1997) FEBS 1997, Biochemica et Biophysica Acta 1546(2001) 21-43.'
C180CRNt	STCRNCACT	'transport of Stearoyl-CoA into mitochondrial matrix'	'stcrn[c] <=> stcrn[m] '	'Carnitine shuttle'	Mitochondrial carnitine/acylcarnitine carrier protein	''	4	'788.1'	'cpt1 reaction mentioned above as C180CPT1. cact reaction in recon1 as C180CRNt'	'Biochemica et Biophysica Acta 1486(2000) 1-17, Eur. J. Biochem. 244, 1-14 (1997) FEBS 1997, Biochemica et Biophysica Acta 1546(2001) 21-43.'
C180CPT2	STCRNCPT2	'transport of Stearoyl-CoA into mitochondrial matrix'	coa[m] + stcrn[m] <=> crn[m] + stcoa[m] '	'Carnitine shuttle'	Carnitine O-palmitoyltransferase 2, mitochondrial	'2.3.1.21'	4	'1376.1'	''	'Biochemica et Biophysica Acta 1486(2000) 1-17, Eur. J. Biochem. 244, 1-14 (1997) FEBS 1997, Biochemica et Biophysica Acta 1546(2001) 21-43.'
STRDNCCPT1	STDCOACPT1	'transport of stearidonyl coenzyme A into mitochondrial matrix'	'crn[c] + strdnccoa[c] <=> coa[c] + strdnccrn[c] '	'Carnitine shuttle'	Carnitine O-palmitoyltransferase 1, liver isoform,Carnitine O-palmitoyltransferase 1, muscle isoform,Carnitine O-palmitoyltransferase 1, brain isoform	'2.3.1.21'	4	'(1374.1 or 1375.1 or 126129.1)'	'in recon 1 STRDNCCPT1'	'Biochemica et Biophysica Acta 1486(2000) 1-17, Eur. J. Biochem. 244, 1-14 (1997) FEBS 1997, Biochemica et Biophysica Acta 1546(2001) 21-43.'
STRDNCCRNt	STDCRNCACT	'transport of stearidonyl coenzyme A into mitochondrial matrix'	'strdnccrn[c] <=> strdnccrn[m] '	'Carnitine shuttle'	Mitochondrial carnitine/acylcarnitine carrier protein	''	4	'788.1'	'in recon1 STRDNCCRNt'	'Biochemica et Biophysica Acta 1486(2000) 1-17, Eur. J. Biochem. 244, 1-14 (1997) FEBS 1997, Biochemica et Biophysica Acta 1546(2001) 21-43.'
STRDNCCPT2	STDCRNCPT2	'transport of stearidonyl coenzyme A into mitochondrial matrix'	'coa[m] + strdnccrn[m] <=> crn[m] + strdnccoa[m] '	'Carnitine shuttle'	Carnitine O-palmitoyltransferase 2, mitochondrial	'2.3.1.21'	4	'1376.1'	'in recon1 STRDNCCPT2'	'Biochemica et Biophysica Acta 1486(2000) 1-17, Eur. J. Biochem. 244, 1-14 (1997) FEBS 1997, Biochemica et Biophysica Acta 1546(2001) 21-43.'
TTDCPT1	TDCOACPT1	'transport of Tetradecanoyl-CoA into mitochondrial matrix'	'crn[c] + tdcoa[c] <=> coa[c] + ttdcrn[c] '	'Carnitine shuttle'	Carnitine O-palmitoyltransferase 1, liver isoform,Carnitine O-palmitoyltransferase 1, muscle isoform,Carnitine O-palmitoyltransferase 1, brain isoform	'2.3.1.21'	4	'(1374.1 or 1375.1 or 126129.1)'	'mentioned in recon1 as TTDCPT1'	'Biochemica et Biophysica Acta 1486(2000) 1-17, Eur. J. Biochem. 244, 1-14 (1997) FEBS 1997, Biochemica et Biophysica Acta 1546(2001) 21-43.'
TTDCRNt	TDCRNCACT	'transport of Tetradecanoyl-CoA into mitochondrial matrix'	ttdcrn[c] <=> ttdcrn[m] '	'Carnitine shuttle'	Mitochondrial carnitine/acylcarnitine carrier protein	''	4	'788.1'	''	'Biochemica et Biophysica Acta 1486(2000) 1-17, Eur. J. Biochem. 244, 1-14 (1997) FEBS 1997, Biochemica et Biophysica Acta 1546(2001) 21-43.'
TTDCPT2	TDCRNCPT2	'transport of Tetradecanoyl-CoA into mitochondrial matrix'	'coa[m] + ttdcrn[m] <=> crn[m] + tdcoa[m] '	'Carnitine shuttle'	Carnitine O-palmitoyltransferase 2, mitochondrial	'2.3.1.21'	4	'1376.1'	'mentioned in recon1 as TTDCPT2'	'Biochemica et Biophysica Acta 1486(2000) 1-17, Eur. J. Biochem. 244, 1-14 (1997) FEBS 1997, Biochemica et Biophysica Acta 1546(2001) 21-43.'
C161CPT12	THD2COACPT1	'transport of trans-Hexadec-2-enoyl-CoA into mitochondrial matrix'	'crn[c] + hdd2coa[c] <=> coa[c] + hdd2crn[c] '	'Carnitine shuttle'	Carnitine O-palmitoyltransferase 1, liver isoform,Carnitine O-palmitoyltransferase 1, muscle isoform,Carnitine O-palmitoyltransferase 1, brain isoform	'2.3.1.21'	4	'(1374.1 or 1375.1 or 126129.1)'	'in recon1 C161CPT12'	'Biochemica et Biophysica Acta 1486(2000) 1-17, Eur. J. Biochem. 244, 1-14 (1997) FEBS 1997, Biochemica et Biophysica Acta 1546(2001) 21-43.'
C161CRN2t	THD2CRNCACT	'transport of trans-Hexadec-2-enoyl-CoA into mitochondrial matrix'	'hdd2crn[c] <=> hdd2crn[m] '	'Carnitine shuttle'	Mitochondrial carnitine/acylcarnitine carrier protein	''	4	'788.1'	'in recon1 C161CRN2t'	'Biochemica et Biophysica Acta 1486(2000) 1-17, Eur. J. Biochem. 244, 1-14 (1997) FEBS 1997, Biochemica et Biophysica Acta 1546(2001) 21-43.'
C161CPT22	THD2CRNCPT2	'transport of trans-Hexadec-2-enoyl-CoA into mitochondrial matrix'	'coa[m] + hdd2crn[m] <=> crn[m] + hdd2coa[m] '	'Carnitine shuttle'	Carnitine O-palmitoyltransferase 2, mitochondrial	'2.3.1.21'	4	'1376.1'	'in recon 1 C161CPT22'	'Biochemica et Biophysica Acta 1486(2000) 1-17, Eur. J. Biochem. 244, 1-14 (1997) FEBS 1997, Biochemica et Biophysica Acta 1546(2001) 21-43.'
TMNDNCCPT1	TMDCOACPT1	'transport of timnodonyl coenzyme A into mitochondrial matrix'	'crn[c] + tmndnccoa[c] <=> coa[c] + tmndnccrn[c] '	'Carnitine shuttle'	Carnitine O-palmitoyltransferase 1, liver isoform,Carnitine O-palmitoyltransferase 1, muscle isoform,Carnitine O-palmitoyltransferase 1, brain isoform	'2.3.1.21'	4	'(1374.1 or 1375.1 or 126129.1)'	'in recon 1 TMNDNCCPT1'	'Biochemica et Biophysica Acta 1486(2000) 1-17, Eur. J. Biochem. 244, 1-14 (1997) FEBS 1997, Biochemica et Biophysica Acta 1546(2001) 21-43.'
TMNDNCCRNt	TMDCRNCACT	'transport of timnodonyl coenzyme A into mitochondrial matrix'	tmndnccrn[c] <=> tmndnccrn[m] '	'Carnitine shuttle'	Mitochondrial carnitine/acylcarnitine carrier protein	''	4	'788.1'	''	'Biochemica et Biophysica Acta 1486(2000) 1-17, Eur. J. Biochem. 244, 1-14 (1997) FEBS 1997, Biochemica et Biophysica Acta 1546(2001) 21-43.'
TMNDNCCPT2	TMDCRNCPT2	'transport of timnodonyl coenzyme A into mitochondrial matrix'	'coa[m] + tmndnccrn[m] <=> crn[m] + tmndnccoa[m] '	'Carnitine shuttle'	Carnitine O-palmitoyltransferase 2, mitochondrial	'2.3.1.21'	4	'1376.1'	'in recon 1 TMNDNCCPT2'	'Biochemica et Biophysica Acta 1486(2000) 1-17, Eur. J. Biochem. 244, 1-14 (1997) FEBS 1997, Biochemica et Biophysica Acta 1546(2001) 21-43.'

## Sheet: metabolites
NEW abbv.	description	neutral formula	charged formula	charge	keggid	pubchemid	chebid	inchi string	smile	hmdb
c51crn	tiglyl carnitine	C12H21NO4	C12H21NO4	0						HMDB02366
c4crn	butyryl carnitine	C11H21NO4	C11H21NO4	0	C02862	213144				HMDB02013
ivcrn	isovaleryl carnitine	C12H23NO4	C12H23NO4	0						HMDB00688
3ivcoa	3-hydroxyisovalerylcoa	C26H44N7O18P3S	C26H40N7O18P3S	-4	C05998	11966188				HMDB06870
3bcrn	3-hydroxy butyryl carnitine	C11H21NO5	C11H21NO5	0
c6crn	hexanoyl carnitine	C13H25NO4	C13H25NO4	0						HMDB00705
3ivcrn	3-hydroxy-isovaleryl carnitine	C12H23NO5	C12H23NO5	0
c81crn	octenoyl carnitine	C15H27NO4	C15H27NO4	0						HMDB13324
c81coa	octenoylcoa	C29H48N7O17P3S	C29H44N7O17P3S	-4	C05276					HMDB03949
c8crn	octanoyl carnitine	C15H29NO4	C15H29NO4	0	C02838					HMDB00791
c3dc	malonyl carnitine	C10H17NO6	C10H16NO6	-1						HMDB02095
c4dc	succinyl carnitine	C11H19NO6	C11H18NO6	-1
c6dc	adipoyl carnitine	C13H23NO6	C13H22NO6	-1
adpcoa	adipoylcoa	C27H44N7O19P3S	C27H39N7O19P3S	-5	C14143					HMDB04047
c8dc	suberyl carnitine	C15H27NO6	C15H26NO6	-1
sbcoa	suberylcoa	C29H48N7O19P3S	C29H43N7O19P3S	-5
c10dc	sebacoyl carnitine	C17H31NO6	C17H30NO6	-1
sebcoa	sebacoylcoa	C31H52N7O19P3S	C31H47N7O19P3S	-5
decdicrn	decadienoyl carnitine	C17H29NO4	C17H29NO4	0						HMDB13325
decdicoa	decadienoylcoa	C31H50N7O17P3S	C31H46N7O17P3S	-4						HMDB01168
dec24dicoa	2,4-decadienoylcoa	C31H50N7O17P3S	C31H46N7O17P3S	-4						HMDB01168
c101crn	decenoyl carnitine	C17H31NO4	C17H31NO4	0						HMDB13205
c101coa	decenoylcoa	C31H52N7O17P3S	C31H48N7O17P3S	-4
c10crn	decanoyl carnitine	C17H33NO4	C17H33NO4	0						HMDB00651
ddece1crn	dodecenoyl carnitine	C19H35NO4	C19H35NO4	0
ddeccrn	lauroyl carnitine	C19H37NO4	C19H37NO4	0						HMDB02250
tetdec2crn	tetradecadienoyl carnitine	C21H37NO4	C21H37NO4	0
tetdece1crn	tetradecenoyl carnitine	C21H39NO4	C21H39NO4	0						HMDB02014
tetdec2coa	tetradecadienoylcoa	C35H58N7O17P3S	C35H54N7O17P3S	-4
tdcrn	myristoyl carnitine	C21H41NO4	C21H41NO4	0						HMDB05066
3tdcrn	3-hydroxy-tetradecanoyl carnitine	C21H41NO5	C21H41NO5	0
c5dc	glutaryl carnitine	C12H21NO6	C12H21NO6	0						HMDB13130
3hdececrn	3-hydroxyhexadecenoylcarnitine	C23H43NO5	C23H43NO5	0
3hdeccoa	3-hydroxyhexadecenoylcoa	C37H64N7O18P3S	C37H60N7O18P3S	-4
3octdec2crn	3-hydroxyoctadecadienoylcarnitine	C25H45NO5	C25H45NO5	0
3octdece1crn	3-hydroxy-octadecenoyl carnitine	C25H47NO5	C25H47NO5	0
3octdece1coa	3-hydroxyoctadecenoylcoa	C39H68N7O18P3S	C39H64N7O18P3S	-4
3octdeccrn	3-hydroxyoctadecanoyl carnitine	C25H49NO5	C25H49NO5	0
docoscoa	docosanoylcoa	C43H78N7O17P3S	C43H74N7O17P3S	-4						HMDB12930
omhpal	w-hydroxypalmiticacid	C16H32O3	C16H31O3	-1						HMDB06294
hexdiac	hexadecanediocacid	C16H30O4	C16H28O4	-2	C08260					HMDB00672
hexdicoa	hexadecanedioylcoa	C37H64N7O19P3S	C37H59N7O19P3S	-5
tmtrdcoa	4,8,12-trimethyl tridecanoylcoa	C37H66N7O17P3S	C37H62N7O17P3S	-4
tmuncoa	2,6,10-trimethyl undecanoylcoa	C35H62N7O17P3S	C35H58N7O17P3S	-4
dmhepcoa	2,6-dimethyl heptanoylcoa	C30H52N7O17P3S	C30H48N7O17P3S	-4						HMDB06258
docosac	Behenic acid	C22H44O2	C22H43O2	-1	C08281					HMDB00944
omhdocosac	w-hydroxydocosanoicacid	C22H43O3	C22H42O3	-1		17802799
docosdiac	docosanedioicacid	C22H42O4	C22H40O4	-2		244872
4hexdtetcoa	4,7,10,13-hexadecatetraenoylcoa	C37H58N7O17P3S	C37H54N7O17P3S	-4
hexdpencoa	2,4,7,10,13-hexadecapentaenoylcoa	C37H56N7O17P3S	C37H52N7O17P3S	-4
3hexdtetcoa	3,7,10,13-hexadecatetraenoylcoa	C37H58N7O17P3S	C37H54N7O17P3S	-4
2hexdtetcoa	2,7,10,13-hexadecatetraenoylcoa	C37H58N7O17P3S	C37H54N7O17P3S	-4
5tedtricoa	5,8,11-tetradecatrienoylcoa	C35H56N7O17P3S	C35H52N7O17P3S	-4
3dodtricoa	3,6,9-dodecatrienoylcoa	C33H52N7O17P3S	C33H48N7O17P3S	-4
2dodtricoa	2,6,9-dodecatrienoylcoa	C33H52N7O17P3S	C33H48N7O17P3S	-4
dec47dicoa	4,7-decadienoylcoa	C31H50N7O17P3S	C31H46N7O17P3S	-4
dectricoa	2,4,7-decatrienoylcoa	C31H48N7O17P3S	C31H44N7O17P3S	-4
3decdicoa	3,7-decadienoylcoa	C31H50N7O17P3S	C31H46N7O17P3S	-4
2decdicoa	2,7-decadienoylcoa	C31H50N7O17P3S	C31H46N7O17P3S	-4
octe5coa	5-octenoylcoa	C29H48N7O17P3S	C29H44N7O17P3S	-4
hexe3coa	3-hexenoylcoa	C27H44N7O17P3S	C27H40N7O17P3S	-4						HMDB06522
docohexcoa	2,4,7,10,13,16-docosahexenoylcoa	C43H66N7O17P3S	C43H62N7O17P3S	-4
3docopencoa	3,7,10,13,16-docosapentenoylcoa	C43H68N7O17P3S	C43H64N7O17P3S	-4
2docopencoa	2,7,10,13,16-docosapentenoylcoa	C43H68N7O17P3S	C43H64N7O17P3S	-4
eitetcoa	5,8,11,14-eicosatetraenoylcoa	C41H66N7O17P3S	C41H62N7O17P3S	-4
eipencoa	2,5,8,11,14-eicosapentaenoylcoa	C41H64N7O17P3S	C41H60N7O17P3S	-4
3octdectecoa	3,6,9,12-octadecatetraenoylcoa	C39H62N7O17P3S	C39H58N7O17P3S	-4
2octdectecoa	2,6,9,12-octadecatetraenoylcoa	C39H62N7O17P3S	C39H58N7O17P3S	-4
4hexdtricoa	4,7,10-hexadecatrienoylcoa	C37H60N7O17P3S	C37H56N7O17P3S	-4
hexdectecoa	2,4,7,10-hexadecatetraenoylcoa	C37H58N7O17P3S	C37H54N7O17P3S	-4
3hexdtricoa	3,7,10-hexadecatrienoylcoa	C37H60N7O17P3S	C37H56N7O17P3S	-4
2hexdtricoa	2,7,10-hexadecatrienoylcoa	C37H60N7O17P3S	C37H56N7O17P3S	-4
tetdecdicoa	5,8-tetradecadienoylcoa	C35H58N7O17P3S	C35H54N7017P3S	-4						HMDB02288
3ddecdicoa	3,6-dodecadienoylcoa	C33H54N7O17P3S	C33H50N7O17P3S	-4	C05280					HMDB03952
2ddecdicoa	2,6-dodecadienoylcoa	C33H54N7O17P3S	C33H50N7O17P3S	-4	C05279					HMDB11123
dece4coa	4-decenoylcoa	C31H52N7O17P3S	C31H48N7O17P3S	-4						HMDB02145
dece3coa	3-decenoylcoa	C31H52N7O17P3S	C31H48N7O17P3S	-4		16019966	29126
doco13ecoa	13-docosenoylcoa	C43H76N7O17P3S	C43H72N7O17P3S	-4		24892791
ei11ecoa	11-eicosenoylcoa	C41H72N7O17P3S	C41H68N7O17P3S	-4		24892790
ocde9ecoa	9-octadecenoylcoa	C39H68N7O17P3S	C39H64N7O17P3S	-4		5280355
hexddcoa	7,10-hexadecadienoylcoa	C37H62N7O17P3S	C37H58N7O17P3S	-4
tridcoa	tridecanoylcoa	C34H60N7O17P3S	C34H56N7O17P3S	-4						HMDB13109
undcoa	undecanoylcoa	C32H56N7O17P3S	C32H52N7O17P3S	-4						HMDB13114
noncoa	nonanoylcoa	C30H52N7O17P3S	C30H48N7O17P3S	-4	C01942					HMDB13028
hepcoa	heptanoylcoa	C28H48N7O17P3S	C28H44N7O17P3S	-4						HMDB12969
pentcoa	pentanoylcoa	C26H44N7O17P3S	C26H40N7O17P3S	-4	C00888					HMDB13037
tetd7ecoa	7-tetradecenoylcoa	C35H60N7O17P3S	C35H56N7O17P3S	-4
dd5ecoa	5-dodecenoylcoa	C33H56N7O17P3S	C33H52N7O17P3S	-4
octd11ecoa	11-octadecenoylcoa	C39H68N7O17P3S	C39H64N7O17P3S	-4
thexddcoa	trans7,10-hexadecadienoylcoa	C37H62N7O17P3S	C37H58N7O17P3S	-4
ttetddcoa	trans5,8tetradecadienoylcoa	C35H58N7O17P3S	C35H54N7O17P3S	-4						HMDB02288
tddedicoa	trans3,6dodecadienoylcoa	C33H54N7O17P3S	C33H50N7O17P3S	-4		5280771
tddedi2coa	trans2,6dodecadienoylcoa	C33H54N7O17P3S	C33H50N7O17P3S	-4
tdec4ecoa	trans4decenoylcoa	C31H52N7O17P3S	C31H48N7O17P3S	-4
ctdecdcoa	cis2trans4decadienoylcoa	C31H50N7O17P3S	C31H46N7O17P3S	-4
hexdtrcoa	7,10,13-hexadecatrienoylcoa	C37H60N7O17P3S	C37H56N7O17P3S	-4
docohepcoa	2,4,7,10,13,16,19-docosaheptenoylcoa	C43H64N7O17P3S	C43H60N7O17P3S	-4
docosahexcoa	3,7,10,13,16,19-docosahexenoylcoa	C43H66N7O17P3S	C43H62N7O17P3S	-4
2docohexecoa	2,7,10,13,16,19-docosahexenoylcoa	C43H66N7O17P3S	C43H62N7O17P3S	-4
5eipencoa	5,8,11,14,17-eicosapentenoylcoa	C41H64N7O17P3S	C41H60N7O17P3S	-4
3octpencoa	3,6,9,12,15-octadecapentenoylcoa	C39H60N7O17P3S	C39H56N7O17P3S	-4
2octpencoa	2,6,9,12,15-octadecapentenoylcoa	C39H60N7O17P3S	C39H56N7O17P3S	-4
hedepecoa	2,4,7,10,13-hexadecapentenoylcoa	C37H56N7O17P3S	C37H52N7O17P3S	-4
c16dc	Hexadecanedioic acid mono-L-carnitine ester	C23H43NO6	C23H42NO6	-1						HMDB00712
c14dccoa	tetradecanedioylcoa	C35H60N7O19P3S	C35H55N7O19P3S	-5
c12dccoa	dodecanedioylcoa	C33H56N7O19P3S	C33H51N7O19P3S	-5
omhdecacid	w-hydroxydecanoicacid	C10H20O3	C10H19O3	-1
sebacid	sebacicacid	C10H18O4	C10H16O4	-2	C08277					HMDB00792
3deccrn	3-hydroxydecanoylcarnitine	C17H33NO5	C17H33NO5	0
3ddcrn	3-hydroxydodecanoylcarnitine	C19H37NO5	C19H37NO5	0
3hexdcoa	3-hydroxyhexadecanoylcoa	C37H66N7O18P3S	C37H62N7O18P3S	-4	C05258					HMDB03932
3hexdcrn	3-hydroxyhexadecanoylcarnitine	C23H45NO5	C23H45NO5	0						HMDB13336
octdececoa	octadecenoylcoa	C39H68N7O17P3S	C39H64N7O17P3S	-4
3ocddcoa	3-hydroxyoctadecadienoylcoa	C39H66N7O18P3S	C39H62N7O18P3S	-4
ocdececrn	11-octadecenoyl carnitine	C25H47NO4	C25H47NO4	0						HMDB06351
hexde7coa	7-hexadecenoylcoa	C37H64N7O17P3S	C37H60N7O17P3S	-4
tetde5coa	5-tetradecenoylcoa	C35H60N7O17P3S	C35H56N7O17P3S	-4
tetdece1coa	tetradecenoylcoa	C35H60N7O17P3S	C35H56N7O17P3S	-4
adpac	adipic acid	C6H10O4	C6H8O4	-2						HMDB00448
3hdcoa	(S)-3-Hydroxydecanoyl-CoA		C31H50N7O18P3S	-4
dodecanac	Dodecanedioic acid	C12H22O4	C12H20O4	-2						HMDB00623
c12dc	dodecanedioyl carnitine	C19H35NO6	C19H34NO6	-1
3hddcoa	(S)-3-Hydroxydodecanoyl-CoA		C33H54N7O18P3S	-4
3tetd7ecoa	3-hydroxy tetradecenoyl-7-coa	C35H60N7O18P3S	C35H56N7O18P3S	-4
3tetd7ecoacrn	3-hydroxy tetradecenoyl-7-carnitine	C21H39NO5	C21H39NO5	0
3ttetddcoa	3-hydroxy trans5,8tetradecadienoyl coa	C35H58N7O18P3S	C35H54N7O18P3S	-4
3ttetddcoacrn	3-hydroxy trans5,8tetradecadienoyl carnitine	C21H37NO5	C21H37NO5	0
3htdcoa	(S)-3-Hydroxytetradecanoyl-CoA		C35H58N7O18P3S	-4
3thexddcoa	3-hydroxy trans7,10-hexadecadienoylcoa	C37H62N7O18P3S	C37H58N7O18P3S	-4
3thexddcoacrn	3-hydroxy trans7,10-hexadecadienoyl carnitine	C23H41NO5	C23H41NO5	0
3hodcoa	(S)-3-Hydroxyoctadecanoyl-CoA		C39H66N7O18P3S	-4
hxcoa	Hexanoyl-CoA (n-C6:0CoA)		C27H42N7O17P3S	-4
dca	Decanoate (n-C10:0)		C10H19O2	-1
doco13ac	docosenoic acid (C22:1)	C22H42O2	C22H41O2	-1						HMDB02068
dc2coa	trans-Dec-2-enoyl-CoA		C31H48N7O17P3S	-4
hx2coa	trans-Hex-2-enoyl-CoA		C27H40N7O17P3S	-4
octdececrn	octadecenoyl carnitine (hypothetical, position of double bond unknown)	C25H47NO4	C25H47NO4	0
subeac	suberic acid	C8H14O4	C8H12O4	-2						HMDB00893
dd3coa	3-dodecenoylcoa	C33H56N7O17P3S	C33H52N7O17P3S	-4

## Sheet: genes
locus name	gene symbol	chromosome	5' coordinates	3'coordinates	gene type	putative function
26061	HACL1	3p25.1			protein coding	2-hydroxyacyl-CoA lyase 1
26063	DECR2	16p13.3			protein coding	2,4-dienoyl CoA reductase 2, peroxisomal
10455	PECI	6p24.3			protein coding	peroxisomal D3,D2-enoyl-CoA isomerase
37	ACADVL	17p13.1			protein coding	acyl-CoA dehydrogenase, very long chain
3033	HADH	4q22-q26			protein coding	hydroxyacyl-CoA dehydrogenase
10449	ACAA2	18q21.1			protein coding	acetyl-CoA acyltransferase 2
1666	DECR1	8q21.3			protein coding	2,4-dienoyl CoA reductase 1, mitochondrial
215	ABCD1	Xq28			protein coding	ATP-binding cassette, sub-family D (ALD), member 1
225	ABCD2	12q11-q12			protein coding	ATP-binding cassette, sub-family D (ALD), member 2
5825	ABCD3	1p22-p21			protein coding	ATP-binding cassette, sub-family D (ALD), member 3
28965	SLC27A6	5q23.3			protein coding	This gene encodes a member of the fatty acid transport protein family (FATP). FATPs are involved in the uptake of long-chain fatty acids and have unique expression patterns.
23205	ACSBG1	15q23-q24			protein coding	The protein encoded by this gene possesses long-chain acyl-CoA synthetase activity. It is thought to play a central role in brain very long-chain fatty acids metabolism and myelinogenesis.
81616	ACSBG2	19p13.3			protein coding	acyl-CoA synthetase bubblegum family member 2
1622	DBI	2q12-q21			protein coding	diazepam binding inhibitor (GABA receptor modulator, acyl-CoA binding protein)
51	ACOX1	17q24-q25; 17q25.1			protein coding	acyl-CoA oxidase 1, palmitoyl
1962	EHHADH	3q26.3-q28			protein coding	enoyl-CoA, hydratase/3-hydroxyacyl CoA dehydrogenase
3295	HSD17B4	5q21			protein coding	hydroxysteroid (17-beta) dehydrogenase 4
30	ACAA1	3p23-p22			protein coding	acetyl-CoA acyltransferase 1
8529	CYP4F2	19p13.12			protein coding	cytochrome P450, family 4, subfamily F, polypeptide 2
4051	CYP4F3	19p13.2			protein coding	cytochrome P450, family 4, subfamily F, polypeptide 3
128	ADH5	4q23			protein coding	alcohol dehydrogenase 5 (class III), chi polypeptide
224	ALDH3A2	17p11.2			protein coding	aldehyde dehydrogenase 3 family, member A2
51703	ACSL5	10q25.1-q25.2			protein coding	acyl-CoA synthetase long-chain family member 5
11001	SLC27A2	15q21.2			protein coding	solute carrier family 27 (fatty acid transporter), member 2
5264	PHYH	10p13			protein coding	phytanoyl-CoA 2-hydroxylase
8310	ACOX3	4p15.3			protein coding	acyl-CoA oxidase 3, pristanoyl
3030	HADHA	2p23			protein coding	hydroxyacyl-CoA dehydrogenase/3-ketoacyl-CoA thiolase/enoyl-CoA hydratase (trifunctional protein), alpha subunit
3032	HADHB	2p23			protein coding	hydroxyacyl-CoA dehydrogenase/3-ketoacyl-CoA thiolase/enoyl-CoA hydratase (trifunctional protein), beta subunit
1632	DCI	16p13.3			protein coding	dodecenoyl-CoA isomerase
1892	ECHS1	10q26.2-q26.3			protein coding	enoyl CoA hydratase, short chain, 1, mitochondrial
34	ACADM	1p31			protein coding	acyl-CoA dehydrogenase, C-4 to C-12 straight chain
35	ACADS	12q24.31			protein coding	acyl-CoA dehydrogenase, C-2 to C-3 short chain
5096	PCCB	3q21-q22			protein coding	propionyl CoA carboxylase, beta polypeptide
5095	PCCA	13q32			protein coding	propionyl CoA carboxylase, alpha polypeptide
84693	MCEE	2p13.3			protein coding	methylmalonyl CoA epimerase
4594	MUT	6p12.3			protein coding	methylmalonyl CoA mutase
31	ACACA	17q21			protein coding	acetyl-CoA carboxylase alpha
32	ACACB	12q24.11			protein coding	acetyl-CoA carboxylase beta
23417	MLYCD	16q24			protein coding	malonyl-CoA decarboxylase
1374	CPT1A	11q13.2			protein coding	carnitine palmitoyltransferase 1A (liver)
1375	CPT1B	22q13.33			protein coding	carnitine palmitoyltransferase 1B (muscle)
126129	CPT1C	19q13.33			protein coding	carnitine palmitoyltransferase 1C
5019	OXCT1	5p13.1			protein coding	3-oxoacid CoA transferase 1
64064	OXCT2	1p34			protein coding	3-oxoacid CoA transferase 2
622	BDH1	3q29			protein coding	3-hydroxybutyrate dehydrogenase, type 1
54677	CROT	7q21.1			protein coding	carnitine O-octanoyltransferase
788	SLC25A20	3p21.31			protein coding	solute carrier family 25 (carnitine/acylcarnitine translocase), member 20
1384	CRAT	9q34.1			protein coding	carnitine O-acetyltransferase
1376	CPT2	1p32			protein coding	carnitine palmitoyltransferase 2
10005	ACOT8	20q13.12			protein coding	The protein encoded by this gene is a peroxisomal thioesterase that appears to be involved more in the oxidation of fatty acids rather than in their formation. The encoded protein can bind to the human immunodeficiency virus-1 protein Nef, and mediate Nef-induced down-regulation of CD4 in T-cells
376497	SLC27A1	19p13.11			protein coding	solute carrier family 27 (fatty acid transporter), member 1
11000	SLC27A3	1q21.3			protein coding	solute carrier family 27 (fatty acid transporter), member 3
10999	SLC27A4	9q34.11			protein coding	solute carrier family 27 (fatty acid transporter), member 4
10998	SLC27A5	19q13.43			protein coding	solute carrier family 27 (fatty acid transporter), member 5
